# Supplementary material
Source: publisher figshare collection journal article supplement (https://gsajournals.figshare.com/ndownloader/files/26579624)
Supplement: Supplementary file 1 [file 26579624]

>1 length=4944462 depth=1.00x circular=true
GTGTCACTTTCGCTTTGGCAGCAGTGTCTTGCCCGATTGCAGGATGAGTTACCAGCCACAGAATTCAGTA
TGTGGATACGCCCATTGCAGGCGGAACTGAGCGATAACACGCTGGCCCTGTACGCGCCAAACCGTTTTGT
CCTCGATTGGGTACGGGACAAGTACCTTAATAATATCAATGGACTGCTAACCAGTTTCTGCGGAGCGGAT
GCCCCACAGCTGCGTTTTGAAGTCGGCACCAAACCGGTGACGCAAACGCCACAAGCGGCAGTGACGAGCA
ACGTCGCGGCCCCTGCACAGGTGGCGCAAACGCAGCCGCAACGTGCTGCGCCTTCTACGCGCTCGGGTTG
GGATAACGTCCCGGCTCCGGCAGAACCGACCTATCGTTCTAACGTAAACGTCAAACACACGTTTGATAAC
TTCGTTGAAGGTAAATCTAACCAACTGGCGCGCGCGGCGGCTCGCCAGGTGGCAGATAACCCTGGCGGTG
CTTATAACCCGTTGTTCCTTTATGGCGGCACGGGTTTGGGTAAAACTCACCTGCTGCATGCGGTGGGTAA
CGGCATTATGGCGCGCAAGCCGAATGCCAAAGTGGTTTATATGCACTCCGAGCGCTTTGTTCAGGACATG
GTTAAAGCCCTGCAAAACAACGCGATCGAAGAGTTTAAACGCTACTACCGTTCCGTAGATGCACTGCTGA
TCGACGATATTCAGTTTTTTGCTAATAAAGAACGATCTCAGGAAGAGTTTTTCCACACCTTCAACGCCCT
GCTGGAAGGTAATCAACAGATCATTCTCACCTCCGATCGCTATCCGAAAGAGATCAACGGCGTTGAGGAT
CGTTTGAAATCCCGCTTCGGCTGGGGACTGACTGTGGCGATCGAACCGCCAGAGCTGGAAACCCGCGTGG
CGATCCTGATGAAAAAGGCCGACGAAAACGACATTCGTTTGCCGGGCGAAGTGGCGTTCTTTATCGCCAA
GCGTCTACGATCTAACGTACGTGAGTTGGAAGGCGCGCTGAACCGCGTCATTGCCAACGCCAACTTTACC
GGACGGGCGATCACCATCGACTTCGTGCGTGAGGCGCTGCGCGACTTGCTGGCATTGCAGGAAAAACTGG
TCACCATCGACAATATTCAGAAGACGGTGGCGGAGTACTACAAGATCAAAGTCGCGGATCTCCTTTCCAA
GCGTCGATCCCGCTCGGTGGCCCGTCCGCGCCAGATGGCGATGGCGCTGGCGAAAGAGCTGACTAACCAC
AGTCTGCCGGAGATTGGCGATGCCTTTGGTGGTCGTGACCACACGACGGTGCTTCATGCCTGCCGGAAGA
TCGAGCAGTTGCGTGAAGAGAGCCACGATATCAAAGAAGATTTTTCTAATTTAATCAGAACATTGTCATC
GTAAACCTATGAAATTTACCGTAGAACGTGAGCATTTATTAAAACCGCTACAACAGGTGAGCGGTCCGTT
AGGTGGTCGTCCTACGCTACCGATTCTCGGTAATCTGCTGTTACAGGTTGCTGACGGTACGTTGTCGCTG
ACCGGTACTGATCTCGAGATGGAAATGGTGGCACGCGTTGCGCTGGTTCAGCCGCACGAACCAGGGGCGA
CGACCGTTCCGGCGCGCAAATTCTTTGATATCTGCCGTGGTCTGCCTGAAGGCGCGGAAATTGCCGTGCA
GCTGGAAGGTGAGCGGATGCTGGTGCGCTCCGGGCGTAGCCGTTTTTCGCTGTCTACCCTGCCAGCGGCA
GATTTCCCGAACCTCGATGACTGGCAGAGCGAAGTCGAATTTACCCTGCCGCAGGCGACGATGAAGCGTC
TGATTGAAGCGACCCAGTTTTCTATGGCGCATCAGGACGTTCGCTATTACTTAAACGGTATGCTGTTTGA
AACCGAAGGTGAAGAACTGCGCACCGTGGCGACCGACGGCCACCGTCTGGCAGTCTGTTCAATGCCAATT
GGTCAATCTTTGCCAAGCCATTCGGTGATCGTGCCGCGTAAAGGCGTGATTGAACTGATGCGTATGCTCG
ACGGCGGCGACAATCCGATGCGCGTGCAGATTGGCAGCAACAACATTCGCGCCCACGTTGGCGACTTTAT
TTTCACCTCGAAACTGGTGGATGGTCGCTTCCCGGATTACCGTCGCGTTCTGCCGAAGAACCCGGACAAG
CATCTGGAAGCTGGCTGTGATCTGCTCAAGCAGGCGTTTGCCCGTGCGGCAATTCTCTCTAACGAGAAAT
TCCGCGGCGTGCGTCTGTATGTCAGCGAAAACCAGCTGAAAATCACCGCCAACAACCCAGAACAGGAAGA
AGCGGAAGAGATCCTCGACGTTACCTATAGCGGTGCGGAGATGGAAATCGGCTTCAACGTCAGCTATGTG
CTGGATGTTCTGAACGCACTGAAATGCGAAAACGTCCGCATGATGCTGACCGATTCGGTTTCCAGCGTGC
AGATTGAAGATGCGGCCAGCCAGAGCGCGGCTTATGTTGTCATGCCAATGAGACTGTAATGTCCCTCACC
CGCTTGTTGATCCGCGATTTCCGCAACATTGAAACCGCGGATCTCGCCTTATCTCCCGGCTTTAACTTTC
TGGTAGGTGCCAACGGCAGTGGCAAAACCAGCGTGCTGGAAGCCATCTATACGCTCGGCCACGGTCGGGC
GTTTCGCAGTTTGCAGATTGGTCGCGTCATTCGCCACGAGCAGGAGGCGTTTGTTCTCCACGGACGATTA
CAGGGCGAAGAGCGCGAGACGGCGATTGGTTTAACCAAAGACAAACAAGGCGACAGCAAAGTCCGTATTG
ACGGTACAGACGGGCATAAAGTCGCGGAGCTGGCGCACCTGATGCCAATGCAGCTGATAACGCCAGAAGG
GTTTACTTTACTCAACGGCGGCCCCAAATACAGAAGAGCATTCCTCGACTGGGGATGCTTTCACAACGAA
CCCGGATTTTTCACCGCCTGGAGCAATCTCAAGCGATTGCTCAAGCAGCGCAATGCGGCGCTGCGCCAGG
TGACTCGTTACGAACAGCTACGCCCGTGGGATAAAGAACTGATCCCGCTGGCGGAGCAAATCAGCACCTG
GCGCGCGGAGTATAGCGCCGGTATCGCGGCCGATATGGCTGATACCTGTAAGCAATTTCTCCCTGAGTTT
TCTCTGACTTTCTCTTTCCAGCGCGGCTGGGAGAAAGAGACAGAGTACGCTGAGGTGCTGGAACGTAATT
TTGAACGCGATCGCCAGCTAACCTACACCGCGCACGGCCCGCATAAAGCGGACTTACGCATTCGCGCCGA
CGGTGCGCCGGTGGAAGATACCTTATCGCGTGGGCAGCTTAAGCTGTTGATGTGCGCCTTACGTCTGGCG
CAAGGAGAGTTCCTCACCCGTGAAAGCGGGCGGCGGTGTCTCTACCTGATAGATGATTTTGCCTCTGAGC
TTGATGATGAGCGTCGCGGGCTGCTTGCCAGCCGCTTAAAAGCGACGCAATCACAGGTCTTTGTCAGCGC
GATCAGTGCTGAACACGTTATAGACATGTCGGACGAAAATTCGAAGATGTTTACCGTGGAAAAGGGTAAA
ATAACGGATTAACCCAAGTATAAATGAGCGAGAAACGTTGATGTCGAATTCTTATGACTCCTCCAGTATC
AAAGTCCTGAAAGGGCTGGATGCGGTGCGTAAGCGCCCGGGTATGTATATCGGCGACACGGATGACGGCA
CCGGTCTGCACCACATGGTATTCGAGGTGGTAGATAACGCTATCGACGAAGCGCTCGCGGGTCACTGTAA
AGAAATTATCGTCACCATTCACGCCGATAACTCTGTCTCTGTACAGGATGACGGGCGCGGCATTCCGACC
GGTATTCACCCGGAAGAGGGCGTATCGGCGGCGGAAGTGATCATGACCGTTCTGCACGCAGGCGGTAAAT
TTGACGATAACTCCTATAAAGTGTCCGGCGGTCTGCACGGCGTTGGTGTTTCGGTAGTAAACGCCCTGTC
GCAAAAACTGGAGCTGGTTATCCAGCGCGAGGGTAAAATTCACTGTCAGATCTACGAACACGGTGTACCG
CAGGCCCCGCTGGCGGTTACCGGCGAGACTGAAAAAACCGGCACCATGGTGCGTTTCTGGCCAAGCCTTG
AAACCTTCACCAATGTGACCGAGTTCGAATATGAAATTCTGGCGAAACGTCTGCGTGAGTTGTCGTTCCT
CAACTCCGGCGTTTCCATTCGTCTGCGCGACAAGCGCGACGGCAAAGAAGACCACTTCCACTATGAAGGC
GGCATCAAGGCGTTCGTTGAATATCTGAACAAGAACAAAACGCCGATCCACCCGAATATCTTCTACTTCT
CCACCGAAAAAGACGGTATTGGCGTCGAAGTGGCGTTGCAGTGGAACGATGGCTTCCAGGAAAACATCTA
CTGCTTTACCAACAACATTCCGCAGCGTGACGGCGGTACTCACCTGGCAGGTTTCCGTGCGGCGATGACC
CGTACTCTGAACGCCTACATGGACAAAGAAGGCTACAGCAAAAAAGCCAAAGTCAGCGCCACCGGTGACG
ATGCGCGTGAAGGCCTGATTGCGGTCGTTTCCGTGAAAGTGCCGGACCCGAAATTCTCCTCACAGACCAA
AGACAAACTGGTTTCTTCTGAGGTGAAATCGGCGGTTGAACAGCAGATGAACGAACTGCTGGCGGAATAC
CTGCTGGAAAACCCAACCGACGCGAAAATCGTGGTTGGCAAAATTATCGATGCTGCCCGTGCCCGTGAAG
CGGCGCGTCGCGCGCGTGAAATGACTCGCCGTAAAGGTGCGCTCGACTTAGCGGGCCTGCCGGGCAAACT
GGCAGACTGCCAGGAACGCGACCCGGCGCTTTCCGAACTATACCTGGTGGAAGGGGACTCCGCGGGCGGC
TCTGCGAAGCAGGGGCGTAACCGCAAGAACCAGGCGATTCTGCCGCTGAAGGGTAAAATCCTCAACGTCG
AGAAAGCGCGCTTCGATAAGATGCTCTCTTCTCAGGAAGTGGCGACGCTTATCACCGCGCTTGGTTGTGG
TATCGGTCGTGACGAGTACAACCCGGACAAACTGCGTTATCACAACATCATCATCATGACCGATGCGGAC
GTCGACGGCTCGCACATTCGTACGCTGCTGTTGACCTTCTTCTATCGTCAGATGCCGGAAATCGTTGAAC
GCGGTCACGTCTACATCGCTCAGCCGCCGCTGTACAAAGTGAAGAAAGGTAAGCAGGAACAGTACATTAA
AGACGACGAAGCGATGGATCAGTACCAGATCTCTATCGCGCTGGATGGCGCAACGCTGCACACCAATGCC
AGTGCACCGGCATTGGCTGGCGAAGCGTTAGAGAAACTGGTGTCTGAGTACAACGCGACGCAGAAAATGA
TCAACCGCATGGAGCGTCGTTATCCGAAAGCAATGCTGAAAGAGCTTATCTATCAGCCGACGTTGACGGA
AGCTGACCTCTCTGATGAGCAGACCGTTACCCGCTGGGTGAATGCGCTGGTCAGCGAACTGAACAACAAA
GAACAGCACGGCAGCCAGTGGAAGTTTGATGTCCACACCAATGCCGAACAAAACCTGTTCGAGCCGATTG
TTCGCGTGCGTACCCACGGTGTGGATACTGACTATCCGCTGGATCACGAGTTTATCACCGGTGGTGAATA
TCGTCGTATCTGCACGCTGGGTGAGAAACTGCGTGGCTTGCTGGAAGAAGATGCGTTTATCGAACGTGGC
GAGCGTCGTCAGCCGGTAGCCAGCTTCGAGCAGGCGCTGGACTGGCTGGTGAAAGAGTCCCGTCGCGGCC
TCTCCATCCAGCGTTATAAAGGTCTGGGCGAGATGAACCCGGAACAGCTGTGGGAAACCACCATGGACCC
GGAAAGCCGTCGTATGCTGCGCGTTACCGTTAAAGATGCGATTGCTGCCGACCAGTTGTTCACCACGCTG
ATGGGCGACGCCGTTGAACCGCGCCGTGCGTTTATTGAAGAGAACGCCCTGAAAGCGGCGAATATTGATA
TTTAATGGCGTTAACAATGCGAGCGTGCCTGATGCGCTACGCTTATCAGGCCTCTCCTGCAATATATTGA
ATTTGCATGTTTTTGTAGGCCGGATAAGGCGTTCACGCCGCATCCGGCAAGAAGCTATAAGAAAAGGGCG
GAGATTATCTCCGCCCTTTTTATTTCTGCAATCCGCAATTATCATCCCGCAGATCTATACTTTTTGGGTC
AACACGTAACGCTTTACAGGTGATTATCATGGGGCTTTTTGATGACGTTGTCGGTGCCTTTCTGAAAGGC
GATGCGGGGAAATATCAGGCGATTTTGAGCTGGGTTGAGGAGCAGGGCGGCATTCAGGTGCTGCTGGAAA
AACTGCAAAGTGGCGGCTTAGGGGCCATTCTCTCAACCTGGTTGAGTAATCAACAGAGCAATCAGCCGGT
TAGCGGCGAGCAACTGGAATCAGCGCTCGGCACAAACGCGGTGTCCGATCTCGGGCAAAAACTTGGCGTG
GATACCAGTACAGCTTCCAGTTTACTGGCAGAACAATTGCCGAAGATTATTGATGCGCTCTCACCGCAAG
GTGAAGTGTCACCACAAGCCAATAACGATCTGCTTTCCGCAGGCATGGAACTGCTGAAAGGGAAACTTTT
CCGCTAAGCAAAAGGAGAGCACGCAAAGCGCGTTGCATCCCCCTTTTCCCTCGGGTGTTGTACTGATTTT
TGAGCGGAATCGCGTTAGCATGGATCAGGAACCAATCTACCTGGGGAACTCATGGCTATCAAACTCATTG
CTATCGATATGGATGGCACCCTTCTGCTGCCCGATCACACCATTTCACCCGCTGTTAAAAATGCGATTGC
CGCAGCTCGTGCTCGCGGTGTGAATGTCGTGCTGACGACGGGTCGCCCTTATGCAGGTGTTCACAATTAC
CTGAAAGAGCTGCATATGGAACAGCCGGGCGACTACTGCATTACTTATAACGGCGCGCTGGTACAGAAGG
CCGCTGATGGTAGCACCGTGGCGCAAACCGCTCTCAGCTATGACGACTACCGTTTCCTGGAAAAACTCTC
TCGCGAAGTCGGTTCTCATTTCCACGCCCTGGACCGCACCACGCTGTATACAGCAAATCGCGATATCAGC
TACTACACGGTGCATGAATCCTTCGTTGCCACCATTCCGCTGGTGTTCTGCGAAGCGGAGAAAATGGACC
CCAATACCCAGTTCCTGAAAGTGATGATGATTGATGAACCCGCCATCCTCGACCAGGCGATCGCGCGTAT
TCCGCAGGAAGTGAAAGAGAAATATACCGTGCTGAAAAGTGCGCCGTACTTCCTCGAAATCCTCGATAAA
CGCGTTAACAAAGGTACGGGTGTGAAATCACTGGCCGACGTGTTAGGTATTAAACCGGAAGAAATCATGG
CGATTGGCGATCAGGAAAACGACATTGCAATGATTGAATATGCAGGCGTCGGTGTGGCGATGGATAACGC
TATTCCTTCGGTGAAAGAAGTGGCGAACTTTGTCACCAAATCTAACCTTGAAGATGGCGTGGCGTTTGCC
ATTGAAAAGTATGTGCTGAATTAATCAGTGGGCGGGCAAACGGCATAAACGCGTTTGCCCGCAGCGATTA
ACAATTTTTGGTAGTGCATAAAATCAGGAACTGCAGTGGTGACGTTACTATATCCAGCGTAAGAGTGATT
GGCAGCAGCGCGTTAGCGAGGCCGCTCGGGATGCCATCTGTTGTTTTGTACTCATAAAATCCCACCGTAA
AGGGTTGATGGAAAACCATCACGTTTGAGTAATCCGCTTTTTTATTTTTCTGGTGGATAGAGCCTTTCAG
GCCGTCCAGTATCCATGTACAACGCCGGGTATCACAAATAAAACCATATTGTGTTGCCAGTGCCTTATCT
TCTTCGTTGTTCCAGTCGTAATAGAGCGTAATAGCACCAGAGAAATTCTTATTACTGCTGCTTAAAATAA
ATTTCGCGTTATCAGAAACGGTGATTCTTTCACCATGAATTGCCGGATCGTTCAGCATGTTAACTACCTC
ATCGCCGCCGGTGGTCAACAGATAGTCCAACGATTCACCAACAAAAACATAGCCTTTCGTACCGTTACTA
TCTTCTGCCAGCGATAAACCCTTAATCGTGTCTGACCGCCATTGCTCGGCATGTGGACGGCTTGCAGTAT
TGGAAACCAATCCCCAGGTGATACATCCGGTCAACGCAAATGCCAAAGAACACAAACCGGCAGCCTTAAA
AAATCCTTTAAAATTCAATTTCATGATTAATCCTTTAAACAAGAGTGCTAAGCCGTTGAAAGCATACTCT
TCTTTCCCCCCAGTTTAGCGCCTGATCTCCCTTTTCAGATTTTTGCCCGACGTAGAACATTTTCTTATGG
ATTGTTCTTTTTGTGATCTAAATTGTAGTACAATAGTATAACTTTGTACTACATTAGGCGCGCAGCAAAC
GCGAACGTCATCACGCTGGTACTACAAAATTGCCGCGTTATGCATCGATCGGGGTAAAGTAGAGAAGAAC
ATACAGAGCACAAGGACTCTCCATGACTCTCAATAAAACCGATCGCATCGTTATTACGCTGGGTAAACAG
ATCGTTCACGGCAAATACGTGCCAGGCTCGCCGCTTCCGGCTGAGGCAGAACTCTGTGAGGAGTTTGCAA
CCTCGCGCAACATCATCCGTGAGGTATTTCGTTCGCTGATGGCGAAGCGGCTGATTGAAATGAAACGTTA
TCGCGGGGCGTTTGTGGCTCCGCGTAACCAGTGGAATTACCTCGACACTGACGTACTGCAATGGGTGCTG
GAAAACGACTACGACCCACGGCTTATCAGTGCAATGAGCGAAGTGCGAAATCTGGTGGAACCGGCGATTG
CCCGTTGGGCAGCAGAACGCGCGACCTCCAGCGATCTGGCGCAGATTGAATCGGCGCTGAACGAGATGAT
TGCTAACAATCAGGACCGCGAAGCGTTTAACGAAGCGGATATTCGCTACCACGAGGCGGTGCTGCAGTCG
GTACATAACCCGGTGTTACAGCAACTGAGCATTGCGATCAGTTCGCTGCAGCGGGCGGTTTTTGAACGAA
CCTGGATGGGCGATGAGGCCAACATGCCGCAAACGCTCCAGGAACATAAGGCGCTGTTCGATGCGATAAG
GCATCAGGACGGCGATGCGGCAGAGCAGGCGGCGCTTACCATGATCGCCAGCTCGACACGAAGGTTAAAG
GAAATCACATGACAGCTCGCTACATCGCAATTGACTGGGGATCGACCAATCTGCGCGCTTGGCTTTATCA
GGGCGACCACTGCCTGGACAGCAGGCAATCAGAAGCAGGCGTCACGCGCCTGAACGGAAAATCTCCGGCT
GCGGTGTTAGCAGAAGTGACGACCGACTGGCGTGAAGAGAATACGCCAGTGGTAATGGCAGGAATGGTCG
GCAGCAATGTCGGCTGGAAAGTTGCGCCGTATTTATCCGTTCCAGCCCGTTTTTCGTCTATTGGCGAACA
ATTAACGTCTGTTGGCGACAATATCTGGATTATTCCCGGATTATGCGTCTCTCATGACGATAACCACAAT
GTGATGCGCGGCGAAGAAACACAATTGATCGGCGCGCGCACTCTGGCTCCTTCCTCTCTTTATGTCATGC
CCGGTACGCATTGCAAATGGGTGCAGGCCGATAGCCAGCAAATTAACGATTTTCGCACCGTGATGACCGG
TGAATTACATCATTTACTGTTAAATCACTCATTGATTGGCGCAGGTTTGCCGCCGCAGGAAAACTCTGCC
GATGCTTTCGCGGCTGGTCTTGAGCGTGGCCTTAATGCTCCCGACATATTGCCGCAGCTTTTTGAAGTTC
GCGCCTCGCATGTGCTGGGAACACTTCCCCGCGAACAGGTCAGCGAATTTCTCTCTGGTTTGTTGATTGG
CGCAGAGGTCGCCAGTATGCGCGACTATGTGACCCATCAACAAGTCATCACCCTTGTCGCCGGAACATCG
CTGACCGCGCGCTACCAGCAAGCCTTTCAGGCGATGGGTTGCGACGTGACGGCGGTGGCAGGCGACACGG
CATTTCAGGCTGGTATAAGGAGCATCGCTCATGCAGTGGCAAACTAAACTCCCGCTGATCGCCATTTTGC
GCGGCATTACGCCCGACGAGGCACTGGCACATGTTGGCGCGGTGATTGACGCCGGGTTCGACGCGGTTGA
AATCCCGCTGAATTCTCCACAATGGGAGCAGAGCATTCCCGCCATCGTTGATGCGTATGGCGACAAGGCG
TTGATTGGCGCAGGTACGGTACTCAAACCTGAACAGGTCGATGCGCTCGCCAGGATGGGCTGCCAGCTCA
TCGTTACGCCCAATATCCATAGTGAAGTGATCCGCCGTGCGGTGGGCTACGGCATGACCGTCTGCCCCGG
CTGCGCGACGGCGACCGAAGCCTTTACCGCGCTCGAAGCGGGCGCGCAGGCGCTGAAAATATTTCCGTCA
TCGGCTTTTGGTCCGCAATACATCAAAGCATTAAAAGCGGTATTACCACCGGACATCGCGGTCTTTGCCG
TTGGCGGTGTGACGCCAGAAAACCTGGCGCAGTGGATAGATGCAGGCTGTGCCGGAGCGGGCTTAGGTAG
CGATCTCTATCGCGCCGGGCAGTCCGTAGAACGGACTGCGCAGCAGGCAGCAGCATTTGTTAAGGCGTAT
CGAGAGGCAGTGCAATGAAAATCACCAAAATTACCACGTATCGTTTACCTCCCCGCTGGATGTTCCTGAA
AATTGAAACCGATGAAGGCGTGGTCGGTTGGGGCGAGCCCGTGATTGAAGGCCGCGCTCGCACGGTGGAA
GCGGCAGTCCACGAGCTGAGTGACTATTTGATTGGTCAGGACCCGTCACGCATCAACGACTTATGGCAAG
TGATGTATCGCGCCGGATTTTATCGTGGCGGTCCAATCCTGATGAGCGCCATCGCCGGGATCGACCAGGC
GTTATGGGATATCAAAGGTAAAGTGCTGAATGCGCCGGTCTGGCAACTGATGGGCGGCCTGGTTCGCGAC
AAAATTAAAGCCTACAGTTGGGTCGGCGGCGATCGTCCTGCGGATGTTATCGACGGCATTAAAACGCTAC
GCGAAATCGGCTTCGATACCTTCAAACTGAACGGTTGTGAAGAACTGGGGCTAATTGATAACTCCCGCGC
GGTAGATGCGGCAGTCAACACCGTGGCGCAAATTCGTGAAGCCTTTGGCAATCAGATTGAGTTTGGTCTT
GATTTCCACGGTCGCGTCAGCGCGCCGATGGCGAAAGTGCTGATTAAAGAGCTGGAACCGTATCGCCCGC
TGTTTATTGAAGAGCCGGTGCTGGTGGAACAGGCCGAATACTACCCGAAACTGGCGGCACAAACGCATAT
TCCACTGGCGGCGGGTGAGCGCATGTTCTCACGCTTCGATTTTAAACGTGTGCTGGAGGCAGGCGGTATT
TCGATTCTGCAACCGGATCTCTCCCATGCACTGTCTCTTATACACAAATCCCCACCCGGGGATTTGTGAT
GTCTGTCAGTCTGCTTTAGGGGGACTCTTTCCATCCGGTAGTTTCCTTCCTCCCCGGCAGCGATTTTTTG
AACTTTTTCCTCACCCGTTGATCTTCTCTTATATTTCATTTTCTTCGGGTCTGTTATGGTACTTTCTGAT
TGTTATTCATGGGCTAACGAGCAGTTTGGACATGCCCGTCTCGGTGATCCGCGTCGTACACGACGCCTTG
TGTCACTGGCCTCTTCTCTCGCTCAGCATGCAGGTCTTTCTATTGTGAAATCATCCCAGTCCACTGCTCA
GGTTGAAGGTGCGTACCGCCTGATACGTAACCCGTCTGTGTCCCCGCAAGCCATTGCCGAAGCCGGATTT
ACCGCCACTGTAAGGGCATGTGAGGCTCATCCGCTGCTCCTCGCGCTGGAAGACACCACCACCATTAACT
TCAGTCACAGTACGGCATCTGATGACCTGGGGAATACCACCACTAACCCGAAGACGCGCGGGCTGCTGGC
TCACTCTGTCCTGATGTACGCCCCCGACAGCGCCCTGCCAGTCGGTCTTATCGAACAGCAGCGCTGGAGT
CGTGCCACGGACACCTACGGTGTTAAGCACCAGCGAAAAGAACGTCCCTATGAAGAAAAAGAAAGTTACC
GCTGGCAGCAGGCTTCGGAGCGCATGGCCGAACGGCTGGGGGAGATACAGAAACGGGTAATCACTGTCTG
TGACCGGGAAGCGGATATCTGGCATTACCTGCATTATAAAGTCAGCCACGGGCAGCGCTTCGTGGTGCGT
GCAGCACAGAATCGCCGGCTGGAAGAAGCACCCGGCAAGCTCTTCGAACTGCCGGAAGTCCTGGCAACCG
CGGGAAGCCACACGCTGAATGTGATGCAAAAAGGCGGGCGGGCAGCCCGCCAGGCCCGGATGTTCATCAG
TTACAGCGAAGTCAGCATAAAAAATCCCGACAACAGCGGCCAGGCGCTCCCGCTCACGTATGTCTGTTGC
CGGGAGCAGGCAGAGGACGGCGCCTGCTGGCATCTGCTGACGTCAGAAAAAGTGGCGAGTGCCGCCGATG
CGCGACGTATCGTCAGCCATTACGAGCGACGCTGGCTGATAGAGGAATACCACAAGGCGTGGAAAAGTGG
TGGTACATGTGTGGAATCGCTGCGAATGCAGACCCGGGATAACCTCGAGCGCATGGTGGTTATCAAGGCG
TTTATCGCGGTGCGGGTGCTGGGCCTGCGGCAGGGCGGTATCAGTGAAGAAACACAAAATGACAGCTGTG
AGAAAATACTGACGCCGACAGAGTGGAAACTGCTGTGGGTTAAGCTGGAAGGAAAACCGCTTCCGTCACA
GATGCCGACACTGAAATGGGCCTGTCTGAAACTGGCGAAACTGGGGCGATGGCATGACAGCAAACGCACC
GGTCGCCCCGGTTGGGTAGTCATGTGGGATGGCTGGTTCAGACTTCAGGATATGGTTGAGGGTTACCTGG
TGATGAAGTCTCTTGATCAGGAGATCTGATCAAGAGACAGCCCATGCAGGCGGTATTACCGAATGCTACA
AAATTGCCGGAATGGCAGAAGCCTATGACGTGACCCTTGCGCCGCACTGTCCGCTCGGACCGATTGCACT
GGCGGCTTGCCTGCATATCGACTTTGTTTCCTATAACGCCGTCCTTCAGGAACAAAGTATGGGCATTCAT
TACAACAAAGGCGCGGAGTTACTCGACTTTGTGAAAAACAAAGAGGACTTCAGCATGGTCGGCGGTTTCT
TTAAACCATTAACGAAACCGGGCTTAGGCGTGGAAATCGACGAAGCTAAAGTTATTGAGTTCAGTAAAAA
TGCCCCGGACTGGCGTAATCCGCTCTGGCGTCATGAAGATAACAGCGTAGCAGAGTGGTAATTCCTGCCA
CGTAAGCCCCTCATCGGGCACTAAAACAGCAATACAAAAATATAACCCTCTGTAAATTACAGGGCATGGT
GAGCGGCTTCGCTATGCCCAAAATCTGGAGAAAGCTCGCTATGGATATTCCCGTTAATGCAGCAAAGCCG
GGGCGTCGGCGTTATCTGACGCTGGTGATGATCTTTATTACGGTGGTCATTTGTTATGTTGACCGCGCTA
ACCTGGCCGTGGCTTCTGCCCATATTCAGGAAGAGTTTGGTATTATTAAAGCGCAAATGGGCTATGTATT
TTCGGCCTTCGCCTGGCTTTATACGCTATGTCAGATCCCCGGTGGTTGGTTTTTAGATCGCGTAGGTTCA
CGCGTGACTTATTTTATTGCGATATTTGGCTGGTCAGTGGCGACGTTATTCCAGGGCTTTGCCACGGGCT
TAATGTCATTAATTGGTCTGCGCGCGATAACCGGTATTTTCGAAGCGCCCGCGTTCCCGACCAATAACCG
GATGGTAACCAGTTGGTTCCCGGAACATGAACGTGCTTCTGCCGTTGGTTTTTATACGTCTGGTCAGTTT
GTCGGTCTGGCGTTTCTGACTCCGCTGCTGATCTGGATTCAGGAGATGTTGAGCTGGCACTGGGTGTTCA
TTGTCACCGGTGGTATCGGCATTATCTGGTCGCTGATTTGGTTTAAGGTTTATCAGCCGCCGCGTCTGAC
CAAAGGCATCAGCAAAGCTGAACTGGATTACATTCGTGATGGCGGCGGTCTGGTGGATGGCGATGCGCCG
GTGAAGAAAGAGGCGCGTCAGCCGTTAACAGCCAAAGACTGGAAACTGGTGTTCCATCGTAAACTGATCG
GTGTCTATCTTGGGCAATTTGCGGTGGCTTCTACACTGTGGTTTTTCTTAACCTGGTTCCCGAACTATTT
AACCCAGGAAAAAGGAATCACAGCGCTGAAAGCAGGCTTTATGACCACGGTGCCGTTCCTCGCGGCGTTT
ATTGGCGTCCTGCTCTCTGGCTGGGTCGCGGATCTGCTGGTACGTAAGGGCTTTTCACTGGGCTTTGCGC
GTAAAACGCCGATTATCTGCGGCTTGCTGATCTCCACCTGCATTATGGGCGCTAACTACACCAACGATCC
GATGATGATTATGTGCCTGATGGCGCTGGCATTCTTCGGCAACGGTTTTGCTTCGATTACCTGGTCGCTG
GTTTCTTCTCTGGCACCGATGCGCCTGATTGGTTTAACCGGCGGCGTGTTTAACTTTGCCGGTGGTCTGG
GCGGCATCACTGTTCCGCTGGTGGTGGGGTACCTGGCGCAGGGTTACGGTTTCGCACCTGCACTGGTTTA
TATCTCCGCCGTCGCGTTGATTGGCGCGCTCTCTTACATCATGCTGGTGGGCGATGTGAAGCGCGTTGGA
TAATCTTTCAACTGTGGAATATGCGCCACTCCACTGCGCATAATCCACTTTCTTAAAGCCGGTGCGGTCA
GGCATCGGCTTTTTACTATCTTGCCGAAGAGTTTTAAACGCAGTTTGCGAGTGGCGCGCCAGTAAGCGGT
ATTGAGCTTCTCTGGCTGCTTCAGTAATACCGAACGCAGAATCTCTGCGCTATCCAGCGCATAGCTAATC
CCCTCCAGCGAGCTGGCGCTGATAAATCCCGCCGCTTCGCCAATCAGAAAGGCGTTGTCCTTGCCGCAGA
CAAAATCCTGCCAGCGTGAGGGAAACAGCACCGTGCATTTTTCGCTTTTCACCGCCTTACCAAACTGGAA
CTGAAAGGCACTCATTTTCTCTTTCAGCGCCGCGAAACGCGCCTGACCGTCTTTCATCGGATAGGCACCG
CCAAAGATAAAATAACCGTCTTTGCTGATACTCCATGAGTAACAGTCAGTTATCGCATTATCAAAGATGC
AGGAGTAGAACGGTACCGGATGTTTCTCTGCGAACCACTGCTGGATGGCGACATATTTACGAATCTGATG
ATCCGGGTAGAGATGTCGCCGCACCATCGAGTTGGCACCATCGGCACCGACCAGATAGCGGGCGGTAATA
TGCTGCTCCCAGCCGTCTGCGCGAAAAATGACATGCCATTTATCATCCTCACGCCAGATTTTTCGACACA
GGCTGTCGTGGTAAACCTCAACGCTGGCGGGGATCAGCGATTTCATCCACAAGTCGAAAGCATGGCGATT
AATATTGATATAGCTTCGCTGGTAGTTACGCGTGAGCGATGCGGCGACGTCGACGGCTTTGACGCTGAAA
ATCTGCGGGTTGGCGATGACATCGACAGGAAGCGTCAGTCCATCGCGAATAAAAGATCGCTGCGCGTCCG
GTGCCAGCAGACCGCCACAAGGTTTGCTGAAACCTTCAGTACCACACTGGTGCTTTTTATCCAGCGCGAT
CACCTGCATTTTTCCTGCTAACTTTCGTGCCAACGCCGACCCTGCCGGGCCGAGGCCAATAATCGCCACG
TCGAAATGTTCCATCTTTTCACTCACATTCATCACGATGGCGAAAGACTATTGTCTGAAAGTGAAGTCCT
TGTGAAGTATGATGGCGGGACCCGTTTTGTATCAGGACCGCGCCATGAAACAGATAACCTTTGCTCCCCG
TAATCACCTGCTCACCAATACCAATACCTGGACGCCCGACAGCCAGTGGCTGGTATTTGACGTGCGTCCT
TCTGGGGCGTCGTTTACCGGCGAGACCATTGAGCGTGTGAATATCCATACCGGCGAGGTCGAGGTTATCT
ATCGCGCGTCACAGGGCGCACACGTCGGCGTGGTGACCGTTCATCCGAAGTCAGAGAAGTATGTCTTCAT
CCACGGCCCGGAAAATCCTGATGAAACATGGTATTACGACTTTCATCATCGGCGCGGAGTGATTGTTGAA
AGCGGCAAGGTGAGCAATCTCGATGCAATGGATATTACCGCGCCATATACGCCAGGAGCGCTGCGCGGCG
GCAGTCATGTACATGTCTTTAGCCCAAACGGTGAAAGGGTGAGCTTTACCTACAACGACCATGTAATGCA
TGAACTCGATCCGGCGCTGGATTTGCGAAATGTCGGTGTTGCTGCACCGTTTGGCCCAGTCAACGTACAA
AAGCAGCATCCGCGTGAATACAGCGGTAGCCACTGGTGCGTGCTGGTAAGTAAAACCACGCCCACGCCAC
AGCCTGGCAGTGATGAAATCAATCGTGCTTATGAAGAAGGATGGGTAGGAAATCACGCACTGGCGTTTAT
TGGCGATACGCTTTCGCAAAAAGGCGAGAAAGTGCCGGAGCTGTTTATTGTCGAGTTGCCGAAAGATGAA
GCTGGCTGGAAAGCGGCAGGTGAAGTGCCGTTAAGTGGAACGGAAACAACCCTGCCCGCGCCACCGCGTG
GCGTCGTGCAGCGACGTTTAACCTTTACGCACCATCGTATTTATCCGGGCCTGGTTAACATTCCGCGCCA
CTGGGTGCGTTGTAATCCTCAAGGAACACAAATTGCGTTTTTAATGCGCGATGATAACGGCATTGTGCAA
CTGTGGCTTATCTCGCCACAGGGCGGTGAACCACGCCAGTTAACCCATAATAAAACGGATATTCAGTCTG
CATTTAACTGGCATCCATCAGGCGAATGGCTGGGATTTGTGCTGGATAATCGGATTGCTTGTGCCCATGC
GCAAAGCGGCGAGGTTGAGTATTTAACCGAAAACCACGCCAATCCACCTTCTGCGGACGCCGTGGTTTTC
TCGCCGGATGGTCAATGGTTGGCGTGGATGGAGGACGGTCAGTTGTGGATCACCGAAACTGATCGCTAAA
TCAGTTATCAGGCATTCTGGCCGGTGGAATAACCGCATTGGTGGCTTGTGCGTTGGCTTCGCTTTTTTCA
ACGCGCGAGCGCACTGAGCTGTCTTTGCGGAACACATCCCACGGTAGCAATATTGTGTCCAGTACTGCGG
TAAATGGCATGTCGAGTATCGCCAGCGATTTTGTGCCCCAGTTGGTTTCATCGTCGCCAATCATGGTTGC
GCTGGCGCGGGTGCCAGGATACGTTCCTTCTTTCCCCCCGGTATGGGACATCACGCTGGAGCATCCTCCG
AGTAATGTCATTCCGCTGCATATCATGAACGCTAACAACACATTTCTTATCATAATAAATTCATCTGTTG
ATCGTGGGTGTTGGCCTGATGAGTTATAGCGATCCCTTGCTGAAAATAACATCATCATTACGTCGCACTG
TGGCGGCTATCGCACTTTAACGTTTCGTGCTGCCCCCTCAGTCTATGCAATAGACCATAAACTGCAAAAA
AAGTCCGCTGATAAGGCTTGAAAAGTTCATTTCCAGACCCATTTTTACATCGTAGCCGATGAGGACGCGC
CTGATGGGTGTTCTGGCTACCTGACCTGTCCATTGTGGAAGGTCTTAGATTCTCGCTGATTTCAGGAGCT
ATTGATTATGCGTAACTTTGATTTATCCCCGCTTTACCGTTCTGCTATTGGATTTGACCGTTTGTTTAAC
CACTTAGAAAACAACCAGAGCCAGAGTAATGGCGGCTACCCTCCGTATAACGTTGAACTGGTAGACGAAA
ACCATTACCGCATTGCTATCGCTGTGGCTGGTTTTGCTGAGAGCGAACTGGAAATTACCGCCCAGGATAA
TCTGCTGGTGGTGAAAGGTGCTCACGCCGACGAACAAAAAGAGCGCACCTATCTGTACCAGGGCATCGCT
GAACGCAACTTTGAACGTAAATTCCAGTTAGCTGAGAACATTCATGTTCGTGGTGCTAACCTGGTGAATG
GTCTGCTGTATATCGATCTCGAACGCGTGATTCCGGAAGCGAAAAAACCGCGCCGCATCGAAATCAACTA
ATTCCCTAAGGCCGCCTGGCGCGGCCTGACATCTCCATGCTCGCCGTCAGGGAGCATATGCGAATCTTCG
GATTTGCAGGTACTTACTCGCTTCTTAGAAGGAGAAATGACTATGCGTAACTTCGATTTATCCCCACTGA
TGCGTCAATGGATCGGTTTTGACAAACTGGCCAACGCACTGCAAAACGCCGGTGAAAGCCAGAGCTTCCC
GCCGTACAACATTGAGAAAAGCGACGATAACCACTACCGCATTACCCTTGCGCTGGCAGGTTTCCGTCAG
GAAGATTTAGAGATTCAACTGGAAGGTACGCGCCTGAGCGTAAAAGGCACGCCAGAGCAGCCAAAAGAAG
AGAAAAAATGGCTGCATCAAGGGCTTATGAATCAGCCTTTTAGCCTGAGCTTTACGCTGGCTGAAAATAT
GGAAGTCTCTGGCGCAACCTTCGTAAACGGTTTACTGCATATTGATTTAATTCGTAACGAGCCTGAACCC
ATCGCAGCGCAGCGTATCGCTATCAGCGAACGTCCCGCGTTAAATAGCTAATTAGCTATTCTCTTTGCCC
CGCCATTCTGGTGGGGCTTTTTTTGTCTTTTTTCTTCGACAATGCGTTAAATTCCGCCTGTTTAAGATAT
TTCGGCACGTTCTTTCCCGTGATAATGTGCGCTATAAGGCAAATCTGCTTCACCGATTCAGCCATAATCC
GTAGCAATTAAAATGTTATTTCAAGAGAAATGGACGATGAGTGATATAGCATTAACGGTCAGTATTCTGG
CTTTGGTGGCGGTCGTCGGGTTGTTTATCGGCAACGTCAAGTTTCGCGGTGTTGGATTGGGCATTGGCGG
CGTGCTGTTCGGTGGGATCATCGTCGGCCATTTTGTTTCTCAGGCGGGGATGACATTAAGTAGCGATATG
CTGCATGTTATTCAGGAGTTTGGCCTGATCCTGTTCGTTTATACCATCGGGATTCAGGTAGGGCCGGGCT
TCTTTGCCTCATTGCGCGTCTCCGGATTACGCCTCAACCTGTTTGCTGTTCTGATCGTCATCATCGGTGG
TCTGGTTACCGCCATCCTGCATAAACTGTTTGATATTCCACTGCCGGTAGTGCTGGGGATTTTTTCCGGC
GCGGTCACCAATACGCCAGCGCTGGGGGCAGGGCAGCAGATCTTGCGCGACCTGGGGACACCGATGGCGA
TGGTCGATCAAATGGGGATGAGCTATGCGATGGCGTATCCATTTGGGATTTGCGGCATTTTGTTCACTAT
GTGGATGCTGCGGGTTATTTTCCGCGTCAATGTTGAGACTGAGGCCCAGCAGCACGAGTCCACGCGAACC
AACGGCGGTGCGCTAATCAGGACGATTAACATCCGAGTTGAGAATCCTAATTTGCATAATTTAGCCATTA
AAGATGTGCCGATTCTCAATGGCGATAAAGTTATTTGCTCACGATTGAAACGAGAAGAAACCCTAAAAGT
GCCTTCGCCAGAAACCGTTATTCAACTGGGCGATTTGCTGCATCTGGTGGGGCAGCCTGCGGATTTACAT
AATGCGCAACTGGTGATTGGTCAGGAGGTCGATACCTCGCTGTCTACGAAAGGCACTGATTTGCGCGTCG
AGCGTGTGGTGGTCACCAATGAAAACGTGCTCGGTAAACGTATTCGCGACCTGCACTTTAAAGAACGCTA
TGACGTTGTTATCTCGCGCCTGAATCGTGCTGGTGTTGAATTAGTTGCAAGTAGCGATATCAGCCTGCAG
TTCGGCGATATCCTCAACCTGGTGGGGCGTCCGTCCGCAATTGATGCCGTTGCCAATGTGCTGGGGAATG
TGCAGCAAAAACTGCAACAGGTTCAGATGCTGCCAGTGTTTATTGGTATCGGGCTTGGCGTATTGTTAGG
TTCTATTCCCGTCTTTGTGCCTGGGTTCCCGGCGGCGTTGAAACTCGGGCTGGCGGGCGGTCCGCTGATT
ATGGCGTTGATCCTCGGGCGTATCGGCAGTATCGGCAAGCTGTACTGGTTTATGCCGCCAAGCGCCAACC
TCGCGCTGCGGGAGCTGGGGATCGTACTGTTCCTCTCGGTCGTTGGCCTGAAATCCGGCGGCGATTTTAT
CCATACACTGGTGGATGGCGAAGGGTTAAGCTGGATTGGTTATGGTGCCCTGATCACCGCCGTTCCGCTG
ATTACTGTTGGCATTCTGGCGCGGATGTTAGCCAAAATGAATTACCTGACCATGTGCGGGATGCTGGCAG
GTTCCATGACCGATCCTCCGGCGCTGGCGTTTGCTAATAATCTTCATCCAACCAGCGGTGCGGCGGCGCT
CTCTTACGCCACTGTCTATCCGTTAGTGATGTTCCTGCGCATTATCACACCCCAATTACTGGCGGTGCTC
TTCTGGAGTATCGGTTAACTCTTTTCCGGGTGGAGTCGCCGTAAATGGTACTCCGCCTGGTATTTCTGAA
CATCATCGAGTCATTTACACACTCGCCATTCTGGTTATTACCTGTCCGTATTCTTCAGCACAGCTGACGG
CGCATAACCAAATTTATGCTTAAAGGCTTTGCTGAAATGAAAGGAGTCGAAGAAGTTGAGCGTATCAGCG
ACTTCGCCAACCGAGTTCCCTTGTTGCTTTAATAGCGATAGCGCCAGATCCAGACGCGCATCGAGGTAAT
ATTCTTTCGGCGTCTTGCCGGTATAGCGTAAAAACAGACGACGCAACCAGGCCTCGCTACAGGGGATCGT
GGCAGCCATATCAGCTACGCTCCAGCGTTGTTGTAGACTGGCATGTAAAGTGGCAATTAATTTTTCAATT
TGCCGCCGTTGTGGATCTTTTTTACCGACTGCGTGCATAAGACAAATCCACTGATAAATAATTTTCGTCA
GAAAAGCGACTGCCAGATTATTTTTTATTGCTTCTGGTGAAGTAATTAACTCAGCAACTTCGGTGAGTTC
CTGATTATAAACTTCGCCATTATAAATAACGCTTTGCTGACCGACGGGAATATCCATCATACTGGTGGGG
GTAAATTCCATCCAGTACTGTTCCCAGACTAAACCTTCACAGTGATAAGAGTGAATATCCATTGGCTTTA
AAAATATAATACAGTTGCCATGCAGAGTTATTTGTTCGTCATTCTTTAAAAGAATTTTCCCACATCCTTG
TACGGTATACACCGCAACCCATGAGTTGGCGATAAGCGGTTTCTTCTTGTCCCGCGGCCAGATCACCCGG
TAATGCTCGTCGGCGTAGGTATGCCAGAGCGATATCAGAGAAATTCCGCTGGAGATCACATTTTCGTTAA
TCAATAAGGGAATATTGTACGGAGTTTCGTTTTTTACATCCGAACTTTGCAATTTTCCATTCATTTTAAT
ATCCCTCCGGCGAATTATGCTCACAACCTGAACTTAACAGAAAACAATCCGTTCAGGGATACGACGTTTG
TATTTTAAGAATCTGACTGCCTGACCCGACGCATTTTACCTCTCCCTATATTCATGCGTCCGGGACATAA
ACATAAATAAGGGCTATGAGATGAATTCGTTACAAATCTTGAGTTTTGTCGGTTTTACGCTGCTGGTAGC
GGTCATCACCTGGTGGAAGGTCCGTAAAACAGATACCGGATCGCAACAAGGCTATTTTCTTGCCGGACGT
TCACTAAAAGCGCCGGTTATTGCCGCTTCGTTAATGCTAACCAACCTTTCCACGGAACAACTGGTCGGCC
TTTCCGGGCAGGCCTACAAAAGTGGCATGTCGGTGATGGGCTGGGAAGTCACCTCTGCAGTGACGCTGAT
CTTCCTCGCGCTAATCTTTTTACCGCGCTATCTGAAGCGCGGCATTGCCACCATCCCCGATTTTCTGGAG
GAACGTTATGATAAAACGACGCGTATTATCATCGACTTCTGCTTCCTCATTGCCACCGGCGTCTGCTTTC
TGCCGATTGTTCTCTATTCCGGCGCGTTGGCGCTCAACAGCCTGTTTCATGTGGGTGAGTCGCTACAACT
TTCCGATGGTGCGGCTATCTGGTTACTGGTTATTTTGCTTGGTCTGGCGGGAATTTTGTATGCGGTGATC
GGCGGACTGCGCGCAATGGCAGTGGCGGACTCCATTAACGGTATTGGGCTGGTTATTGGCGGGTTGATGG
TGCCGGTATTTGGCCTGATCGCGATGGGCAAGGGCAGCTTTATGCAGGGCATTGAGCAACTCACCACCGT
TCACGCCGAGAAATTAAACTCAGTCGGCGGCCCGACCGATCCCTTGCCGATTGGCGCGGCATTTACCGGT
TTGATTCTGGTGAACACCTTTTACTGGTGTACAAATCAGGGCATCGTGCAACGCACGCTGGCGTCAAAAA
GCCTGGCGGAAGGGCAAAAGGGGGCGCTGTTAACGGCGGTGCTGAAAATGCTCGACCCGCTGGTACTGGT
GCTGCCAGGGTTGATTGCGTTTCATCTGTATCAGGATTTACCGAAAGCCGACATGGCCTACCCGACGCTG
GTCAATAACGTTCTGCCGGTGCCACTAGTGGGCTTCTTCGGTGCGGTGTTATTTGGTGCGGTGATCAGTA
CCTTCAACGGCTTTCTGAATAGCGCCAGTACGTTATTCAGTATGGGTATTTACCGGCGCATCATTAACCA
GAATGCCGAGCCGCAACAGCTGGTCACCGTCGGGCGCAAATTTGGTTTCTTTATCGCCATCGTTTCGGTG
ATGGTCGCGCCGTGGATCGCCAACGCGCCGCAGGGGCTGTATAGCTGGATGAAACAGCTCAACGGTATTT
ACAACGTGCCGCTGGTTACCATCATCATTATGGGCTTTTTCTTCCCGCGCATTCCGGCGCTGGCGGCAAA
AGTGGCGATGGGGATTGGCATAATCAGCTACATCACCATCAACTATCTGGTGAAGTTCGACTTCCATTTC
CTCTATGTGCTGGCCTGTACGTTCTGCATCAACGTGGTCGTGATGCTGGTGATCGGTTTTATCAAACCGC
GCGCCACGCCGTTCACCTTCAAAGATGCGTTTGCGGTGGACATGAAACCGTGGAAAAACGTCAAGATTGC
GTCAATTGGTATCCTGTTCGCGATGATTGGCGTCTATGCCGGGTTGGCTGAATTCGGTGGCTACGGTACG
CGCTGGTTAGCGATGATCAGTTATTTCATCGCCGCCGTAGTGATTGTCTACCTGATTTTTGACAGCTGGC
GGCATCGTCACGACCCAGCCGTAACCTTTACTCCCGATGCGAAGGATAGCCTATGAAACGCCCCAATTTT
CTGTTCATCATGACCGATACCCAGGCCACCAATATGGTCGGTTGCTATAGCGGTAAGCCGCTGAATACGC
AAAATATTGATAGTCTGGCGGCAGAAGGTATTCGCTTTAATTCTGCCTACACCTGTTCACCGGTTTGTAC
ACCTGCACGCGCCGGACTATTCACCGGTATCTACGCTAACCAGTCCGGCCCGTGGACCAACAACGTCGCG
CCGGGCAAAAACATCTCCACGATGGGGCGCTACTTTAAGGATGCGGGCTATCACACCTGTTACATCGGCA
AATGGCATCTCGATGGACATGACTATTTCGGCACTGGCGAGTGTCCGCCGGAGTGGGACGCTGATTACTG
GTTCGATGGAGCGAACTATCTTAGTGAACTGACGGAGAAAGAGATTAGCCTGTGGCGCAATGGCCTAAAC
AGCGTTGAGGATTTACAGGCGAACCATATTGACGAAACCTTCACCTGGGCGCACCGCATCAGCAATCGGG
CGGTGGATTTTCTGCAACAGCCCGCGCGCGCCGAGGAACCTTTCCTGATGGTGGTTTCGTATGATGAGCC
GCATCACCCGTTTACCTGTCCGGTGGAGTATTTAGAGAAATATACTGATTTTTACTACGAACTGAGTGAG
AAAGCAGAGGATGACCTGGCGAACAAACCGGAACATCACCGCTTATGGGCGCAGGCGATGCCATCGCCAG
TCGGTGATGACGGGCTTTATCACCATCCGCTCTATTTTGCCTGCAATGACTTTGTTGATGACCAAATCGG
ACGGGTCATCAATGCCTTAACGCCAGAGCAACGTGAAAATACGTGGGTTATTTATACCTCCGATCACGGC
GAAATGATGGGCGCACATAAGCTGATCAGTAAAGGAGCGGCGATGTATGACGACATCACCCGCATTCCAC
TGATCATCCGTTCGCCGCAAGGGGAGCGGCGACAGGTCGATACGCCAGTCAGTCATATTGATTTACTGCC
GACAATGATGGCGCTGGCAGATATTGAAAAACCAGAGATTCTGCCGGGGGAAAATATCCTTGCCGTGAAA
GAACCACGTGGCGTGTTGGTGGAATTTAATCGCTACGAGATTGAGCATGACAGCTTTGGCGGTTTTATTC
CGGTGCGTTGCTGGGTAACGGATGACTTTAAACTGGTGCTCAACCTCTTCACCAGTGATGAACTTTACGA
TCGCCGTAATGACCCAAATGAAATGCATAACCTGATCGATGATATCCATTTTGCCGACGTTCGCAGCAAA
ATGCATGACGCCTTATTGGATTACATGGACAAAATTCGCGATCCGTTCCGCAGTTATCAATGGAACCTGC
GTCCGTGGCGCAAAGATGCACAACCGCGCTGGATGGGGGCGTTTCGTCCACGCCCACAGGATGGTTATTC
TCCAGTGGTACGCGACTATGACACCGGTTTACCGACACAAGGGGTGAAGGTGGAAGAGAAAAAACAGAAG
TTCTGATGCATTATTGCTGTTCCTGGCCTAATTTTTCGGCGAGGAACAGTTTACAAGGAGCAACAATGAA
AATTTCCCGCCTCGGAGAAGCGCCCGATTACCGCTTCTCGCTGGCTAATGAGCGTACTTTTCTGGCGTGG
ATCCGTACTGCACTAGGATTTCTGGCGGCGGGGGTTGGGCTTGATCAACTTGCGCCAGATTTCGCCACGC
CCGTCATCCGCGAACTGCTGGCGTTGTTGTTGTGTCTGTTTTCCGGCGGGTTAGCGATGTATGGCTACTT
GCGCTGGTTACGCAATGAAAAAGCGATGCGCCTGAAAGAGGACCTGCCCTATACCAACAGCTTATTAATC
ATTAGCTTAATATTGATGGTCGTGGCAGTGATCGTCATGGGACTGGTGTTGTATGCCGGATAGCCGCAAA
GCCAGACGCATTGCCGACCCAGGGCTGCAGCCGGAACGCACATCACTGGCGTGGTTTCGTACCATGCTGG
GCTACGGCGCGTTGATGGCGTTGGCTATCAAACACAACTGGCACCAGGCGGGCATGTTATTCTGGATTTC
GATTGGCATCCTCGCCATTGTGGCGCTGATCCTCTGGCACTACACCCGTAATCGCAATTTAATGGATGTC
ACGAATAGCGATTTTTCCCAATTTCACGTAGTCCGTGACAAATTTTTGATCTCCCTCGCGGTGTTATCTC
TCGCAATACTGTTTGCTGTAACGCATATACATCAACTTATCGTATTTATTGAGAGAGTCGCATGACAGGA
AGTCAGGTCATTGATGCTGAAGAGGACAGGCATAAACTGGTTGTAGAGTATAAGGATGCTCTGCAACCTG
CCGATTTTTATCACAATTTCAAACAGCTGGGCATCCGCTCAGTACAGCTTATTCCCCATCTTGAATTTGA
TGACCGGGGCGATCTGACGGCCGCTTCGGTGACAGCAGAGCTGTGGGGGAAATTTTTAATTGCCCTGTTC
GAGTGTTGGGTACGGGCAGATATCAGTCGTATTTCGATTGAGCTTTTTGACGCCACCCTACAAAAATGGT
GTGGCAGCGAAAACCCGCAACCGCGTCGTGGCTGCCAGGCGTGCGACTGGCATCGCCTGTGCCCGCACGC
TCGGGAGGAGACGCCAGACAACGTGCTTTGTGCGGGCTATCAGGCGTTTTATTCTTACTCCGCGCCGCAT
ATGCGGGTGATGCGTGATCTGATAAAGCAGCATCGTTCTCCCATGGAGCTGATGACGATGCTGCGGTGAC
GTGAGCTTAAACAGGCTGCCCCTGATGCGACATCCGCGTCGCCAGCGGTAGCCAGCACAGCACGATCAAC
AATCCCATTAAGGTCATCAACAACCCCAGGCTGCCCTGACCGGTTTGCGGCAACATCGCAGAGAGCGACG
CCAGCACGCCGGAACCAATGTTTTGCAGACCGCCGACCAGCGCGCCAGCGGTGCCCGCCAGGAAGGGGAA
CGGCTCCATCGCGCCGCTGGTAGCCAGTGGAAACAGCATCCCGGCACCGAAAAAGAACAGCGCGGCGGGA
ATGAGCAGCGTCCAGACATTCATCACGCCAAACCAGTCGGGGATCCACATCAGCAAGCCAGCCAGCAGGC
AACAGATAACCGACTGCCACATCAACGTTGAGAAGCGTTTATTGGGACGTCCGGCAAACCATGCGCCAAA
AAATGCCGCCGGAATCGGCAGAATAAACAAAATACTGACCGTCATACTGCTCAGCCCTAACACCGCGCCC
ATCAGCACGCCGGAGCAGGCTTCAAAGGCGGCAATTCCGGCCAGACCGCCAATCAGCATCAGCAAATAAC
AGTTAAAACCGCTGTTACCGAAAAGCGTTTTATAACTGGTAAGCAGGCGCGTGCGCGGTGCGTCGACCGG
ACGCGTTTCCGGCATCCAGCGGGCCATACTGAAAGTCACACCGGCACAAAGAACCAACAAAAAGAGATAA
CAGGCACGCCAGTTCCACATCGTATCCAGCAGACCGCCGATTAGCGGTGCGAGCAACGGACTGACAAGAA
TCCCCATGTTTAACAGGCTGTTAGCATGGCGCAACTGTGTCCGTTCATATAAATCGCGCGGCAAAGTACG
CGCCATTACGCCGCCAACGCCGGTGCCCATCCCCTGCATCGCGCTGGCGGCAATCAATACCGTCAAACTG
GAGGTCGTGACCGCGACCAGCGTTGCCAGCATAAAAATGGACATTCCGACGAGGATCACCGGTCGGCGAC
CCACGCGGTCGGAAATCGGGCCATAAAACAGCTGTGAGACACCGTAAGTCAGCAGATAAGCGCCCATTAC
GCTCTGCACCGCCCCTTCACGGACATTGAGATCGCGCGCCATATCGGCAATAGCTGGAATATAAATGGTT
TGCGCCATCTGACCGACGGCCACGAGTAATACCAACATCAATAACAAATTGACGTTTCTATGCCTTTTCA
TTATCACGGATGCTTTTATAAAAATAATTAGAATAAGTCACTACGCATTCCCATAAATGCGGGAGAGGAA
TCTATCACATTGATGAATGTTAGCCAGATATACGCCAGGAATGGGGAATTGTTTAGCGGCAGAATATGTA
AACAAAAGCGGCAATAAATGTTGCCGGAAACAGTGATGGTGCGGTTGGTAGGGTAAGGTGTTTACGCTGT
ATTCGACATGAATAAGGCGCACTCTGTCAACAATCTGACCGTCTTTCAGGTGATGATGCTTTATTGCCTG
AGTTTCAGTTCAAAATGTGATCTGCCACGTATTTTTATCCGGAAGAAAAATTTTCCATTGTCTCCCCTGT
AAAGCTGTGCTTGTATAAATATTGTTAAACACAAAACCAACAAGGTCCCTAATGACTACTTCCATGTTCA
ACGCAAAACTACTACCAACTGCGCCATCTGCCGCAGTGGTCGTCGTGCGTGTGGTGGTGGTCGTCGGCAA
TGCGCCGTAGGGACTGGAACAACACACGATTCCAAAACCCCGCCGGCGCAAACCGGGCGGGGTTTTTCGT
TTAAGCACCTCCCGGAAAGTCGGCCCAGAAGAAAAGGACTGGAGCATGGCAAGTTCGGGCACAACATCGA
CGCGTAAGCGCTTTACCGGCGCAGAATTTATCGTTCATTTCCTGGAACAGCAGGGCATTAAGATTGTGAC
GGGCATTCCGGGCGGTTCTATCCTGCCTGTTTACGATGCCTTAAGCCAAAGCACGCAAATCCGCCATATT
CTGGCTCGCCATGAACAGGGCGCGGGGTTTATCGCTCAGGGAATGGCGCGCACCGACGGTAAACCGGCGG
TCTGTATGGCCTGTAGCGGACCGGGTGCGACTAACCTGGTGACCGCCATTGCCGATGCGAGGCTGGACTC
CATCCCGCTGATTTGCATCACCGGTCAGGTTTCCGCCTCGATGATCGGCACCGACGCCTTCCAGGAAGTC
GACACCTACGGCATCTCTATCCCCATCACCAAACACAACTATCTGGTCAGACATATCGAAGAACTCCCGC
AGGTCATGAGCGATGCCTTCCGTATTGCGCAATCAGGCCGCCCTGGCCCGGTGTGGATAGACATTCCTAA
GGATGTGCAAACGGCAGTTTTTGAGATTGAAACACAGCCCGCTATGGCAGAAAAAGCCGCCGCACCCGCC
TTTAGCGAAGAAAGTATTCGTGACGCGGCGGCGATGATTAACGCCGCCAAACGCCCGGTGCTTTATCTGG
GTGGTGGTGTGATCAACGCGCCTGCGCGAGTGCGTGAACTGGCGGAGAAAGCGCAACTGCCTACCACCAT
GACTTTAATGGCGCTGGGTATGTTGCCAAAAGCGCATCCGCTGTCGCTGGGTATGCTGGGGATGCACGGT
GTGCGCAGCACCAACTATATTTTGCAGGAGGCGGATCTGCTGATTGTACTCGGTGCGCGTTTTGATGACC
GGGCGATTGGCAAAACCGAGCAGTTCTGTCCGAATGCCAAAATTATTCATGTCGATATCGACCGCGCAGA
GCTGGGCAAAATCAAGCAACCGCATGTGGCAATTCAGGCGGATGTTGATGACGTGCTGGCGCAGTTGATC
CCGCTGGTGGAAGCGCAACCGCGTGCAGAGTGGCACCAGTTGGTGGCGGATTTGCAGCGTGAATTCCCGT
GTCCAATCCCGAAAGCGTGCGATCCATTAAGCCATTACGGCCTGATCAACGCCGTTGCCGCCTGTGTCGA
TGACAATGCGATTATCACCACCGACGTGGGTCAGCATCAGATGTGGACCGCGCAAGCCTATCCGCTCAAT
CGCCCACGCCAGTGGCTGACCTCCGGCGGGCTGGGCACGATGGGTTTTGGCCTGCCTGCGGCGATTGGCG
CGGCGCTGGCGAACCCGGATCGCAGAGTGTTGTGCTTCTCCGGCGACGGCAGCCTGATGATGAATATTCA
GGAGATGGCGACCGCCAGTGAAAATCAGCTGGATGTTAAAATCATTTTGATGAACAACGAAGCGCTGGGG
CTGGTGCATCAGCAACAGAGTCTGTTCTACAAGCAGGGCGTTTTTGCCGCTACCTATCCGGGAAAAATCA
ACTTTATGCAGATTGCCGCCGGATTCGGCCTCGAAACCTGTGATTTGAATAACGAAACCGATCCGCAGGC
TGCATTGCAGGAAATCATCAATCGCCCTGGTCCGGCGCTGATCCACGTGCGCATTGATGCCGAAGAAAAA
GTGTACCCGATGGTGCCGCCAGGTGCGGCGAATACTGAAATGGTGGGGGAATAAGCCATGCAAAACACAA
CTCATGACAACGTGATTCTCGAACTCACCGTTCGCAACCATCCGGGCGTAATGACCCACGTTTGTGGCCT
TTTTGCCCGTCGCGCTTTTAACGTTGAAGGCATTCTCTGCCTGCCGATTCAGGACAGCGACAAAAGCCAT
ATCTGGCTACTGGTCAATGACGACCAGCGTCTGGAGCAGATGATAAGCCAAATCGATAAGCTGGAAGATG
TGGTGAAAGTGCAGCGTAATCAGTCCGATCCGACAATGTTTAACAAGATTGCGGTGTTTTTTCAGTAACC
GCTCAAGGCTTGAACAACATCGCGCTTATCGTTAAGGTAAGCGCGTTTTATTACCCGCTAGGACAAGATC
ATGATCACCGTTGCCCTTATAGACGATCACCTTATCGTCCGCTCCGGCTTTGCGCAGCTGCTGGGGCTGG
AACCTGATTTGCAAGTAGTTGCCGAGTTTGGTTCGGGGCGCGAGGCGCTGGCGGGGTTGCCGGGGCGCGG
TGTGCAGGTGTGTATTTGCGATATCTCCATGCCCGATATCTCCGGTCTGGAGCTGCTAAGCCAGCTGCCG
AAAGGTATGGCGACGATTATGCTCTCTGTTCATGACAGTCCGGCGCTGGTTGAGCAGGCGCTTAACGCGG
GGGCGCGCGGCTTTCTCTCCAAGCGTTGTAGCCCTGACGAACTGATTGCTGCGGTGCATACGGTTGCCAC
GGGCGGCTGTTATCTGACGCCGGATATTGCCATTAAACTGGCATCCGGTCGTCAGGACCCGCTAACCAGA
CGTGAACGCCAGGTGGCGGAAAAACTGGCGCAAGGAATGGCGGTGAAAGAGATTGCCGCCGAACTGGGCT
TGTCACCGAAAACGGTACACGTCCATCGCGCCAATCTGATGGAAAAACTGGGCGTCAGTAACGACGTTGA
ACTGGCGCGCCGTATGTTTGATGGCTGGTGATGAAGACGTTGTTCTCCCGCTTAATTACCGTTATTGCCT
GCTTTTTTATCTTCTCTGCCGCATGGTTTTGCCTGTGGAGTATCAGCCTGCACCTGGTTGAGCGCCCTGA
TATGGCGGTGCTGTTATTTCCGTTTGGCCTGCGGCTAGGGCTAATGCTGCAATGCCCGCGCGGATACTGG
CCGGTGCTACTGGGTGCGGAGTGGCTGCTGATTTACTGGCTAATGCAGGCGGTCGGTTTAACCCATTTCT
CCTTATTGATGATCGGTAGTTTACTGACGTTATTGCCCGTGGCGCTGATCTCGCGCTATCGCCATCAACG
TGACTGGCGCACCTTGCTGTTACAGGGTGCGGCGTTAACGGCGGCGGCGTTGTTGCAGTCGCTGCCCTGG
CTTTGGCACGGCAAAGAGTCGTGGAATGCGCTGCTGCTGACTTTAACTGGCGGCCTGACGCTGGCCCCGA
TATGTCTGGTGTTCTGGCACTATCTCGCCAATAACACCTGGCTGCCGCTCGGCCCGTCACTGGTTTCTCA
ACCAATCAACTGGCGCGGGCGACATCTGGTCTGGTACTTGCTGCTGTTTGTTATCAGTCTCTGGCTCCAG
TTGGGATTGCCAGACGAACTGTCGCGCTTTACGCCATTCTGTCTGGCGCTGCCGATTATCGCGCTGGCCT
GGTACTATGGTTGGCAAGGAGCGCTGATTGCGACATTGATGAACGCCATCGCGCTGATCGCCAGTCAAAC
CTGGCGCGATCATCCGGTGGATTTATTGCTCTCGCTGCTGGTGCAAAGTCTGACAGGGTTGTTACTGGGC
GCAGGCATCCAGCGGTTGCGTGAACTTAACCAGTCGCTGCAAAAAGAACTGGCGCGCAATCAGCATCTGG
CTGAACGTTTGTTAGAAACTGAAGAGAGCGTGCGCCGTGATGTGGCGCGTGAGCTGCACGATGATATCGG
CCAGACTATCACTGCCATTCGTACTCAGGCGGGCATTGTCCAGCGGCTGGCGGCAGATAACGCCAGTGTG
AAGCAGAGCGGGCAGCTCATCGAACAACTATCGCTGGGCGTTTACGACGCGGTGCGCCGTTTGTTAGGTC
GGTTACGTCCGCGCCAGTTGGATGATCTCACCCTGGAGCAGGCCATCCGCTCACTGATGCGGGAAATGGA
GCTGGAAGGGCGCGGCATTGTCAGCTATCTCGAATGGCGAATCGATGAGTCCGCGTTAAGTGAAAACCAG
CGTGTGACGCTGTTTCGTGTCTGCCAGGAAGGGCTGAACAACATTGTGAAACATGCCGATGCCAGCGCGG
TCACCCTGCAAGGCTGGCAGCAGGATGAACGGTTGATGCTGGTAATTGAAGACGATGGCAGCGGTTTGCC
GCCGGGATCCGGGCAACAAGGTTTTGGCCTCACCGGAATGCGCGAGCGCGTAACGGCGCTGGGCGGCACA
TTACACATTTCCTGCCTGCATGGCACGCGTGTCAGCGTTTCTCTACCTCAACGCTATGTCTAAGGTTCGA
TGATGTTGCCGTTTCTGAAAGCGCCTGCCGATGCGCCATTAATGACTGATAAATATGAAATTGATGCCCG
CTATCGTTACTGGCGTCGGCATATTCTGCTGACCATCTGGCTGGGTTACGCGCTGTTTTACTTCACGCGG
AAAAGTTTTAACGCCGCCGTACCAGAAATCCTTGCTAACGGCGTGCTCAGCCGTAGCGATATCGGCCTGT
TAGCGACCCTGTTTTACATTACTTACGGCGTGTCGAAGTTTGTCTCCGGCATTGTCAGCGATCGCTCAAA
TGCCCGTTATTTTATGGGGATAGGGCTTATCGCCACGGGCATCATCAACATTCTGTTTGGCTTCTCGACG
TCGCTATGGGCGTTTGCCGTGCTCTGGGTGCTGAACGCCTTTTTCCAGGGCTGGGGTTCACCGGTGTGTG
CGCGTCTGTTAACGGCCTGGTATTCTCGTACCGAGCGCGGTGGTTGGTGGGCATTATGGAACACGGCGCA
TAACGTTGGCGGCGCACTCATTCCCATTGTGATGGCAGCAGCTGCGCTGCATTACGGCTGGCGTGCCGGG
ATGATGATTGCGGGTTGTATGGCGATCGTCGTGGGGATTTTTCTCTGCTGGCGGCTGCGCGATCGTCCGC
AGGCGTTAGGTTTACCTGCGGTTGGTGAATGGCGGCACGATGCGCTGGAGATTGCTCAACAACAAGAAGG
GGCAGGGCTGACGCGTAAAGAGATCCTCACCAAGTATGTGTTGTTGAATCCGTATATCTGGCTGCTTTCG
TTTTGCTATGTGCTGGTCTATGTGGTTCGGGCGGCGATCAACGACTGGGGCAATTTGTATATGTCCGAGA
CGCTGGGCGTCGATCTGGTCACGGCGAATACAGCAGTGACGATGTTTGAACTGGGCGGATTTATCGGTGC
GCTGGTAGCGGGTTGGGGCTCGGACAAACTGTTTAACGGCAACCGCGGGCCGATGAATTTGATTTTCGCT
GCCGGAATTTTGCTTTCAGTCGGCTCGCTGTGGCTGATGCCATTTGCCAGCTACGTGATGCAGGCAACCT
GCTTCTTCACCATTGGTTTTTTTGTCTTTGGCCCGCAGATGTTAATCGGTATGGCGGCGGCAGAGTGTTC
CCACAAAGAGGCGGCAGGGGCGGCGACGGGATTTGTCGGCTTGTTTGCTTATCTGGGGGCGTCGCTTGCT
GGTTGGCCGCTGGCGAAAGTGCTCGATACCTGGCACTGGAGCGGATTTTTTGTGGTTATCGCCATTGCCG
CCGGGGTTTCCGCACTGCTGTTACTGCCCTTTTTGAACGCCCAGACACCGCGAGAAGCGTGATGCATCTC
ACCTTTTCACTTCATATCCGGCAAAACTAAGAAATTTTCCAGGTTTTGCCTGGACGCTATCTCAGGCCTG
ATTTGCTGCTGATTTTTACAATGCCATCATTCATTAATTCTTTCCCAAAATAATTCAAGTTGCAGGAACG
CAGCAAACGCGTGAGTCCCGGGAGCATAGTGAACTATGTGACCGGGAGGAATGCGTGCAGCTAAGGCACC
TGCGGCTTGAAGTATGAAGGGAAATCAGGAGTAACCCATGCTGGCTTTCCTAAACCAGGTTCGCAAGCCG
ACCCTGGACCTTCCGCTCGAAGTGCGGCGCAAAATGTGGTTCAAACCGTTCATGCAATCCTACCTGGTGG
TCTTTATCGGCTACCTTACGATGTACCTGATTCGCAAGAACTTTAACATCGCGCAGAACGACATGATCTC
GACCTACGGGTTGAGCATGACGCAGCTGGGGATGATCGGCCTGGGCTTCTCCATCACTTATGGCGTGGGT
AAAACGCTGGTTTCTTACTACGCCGACGGCAAAAACACCAAACAATTCCTGCCGTTCATGCTGATCCTGT
CTGCCATTTGTATGCTGGGCTTCAGCGCCAGTATGGGCAGCGGCTCGGTTAGCCTGTTCCTGATGATTGC
CTTCTACGCCTTAAGCGGCTTTTTCCAGAGTACCGGCGGTTCGTGCAGTTACTCCACCATCACCAAATGG
ACGCCGCGTCGTAAACGCGGGACATTCCTCGGTTTCTGGAACATTTCTCACAACCTTGGTGGTGCAGGCG
CAGCAGGTGTGGCGCTGTTCGGCGCAAATTACCTGTTCGATGGTCATGTCATCGGCATGTTTATTTTCCC
GTCGATTATCGCGCTGATTGTTGGTTTTATCGGTCTGCGTTACGGCAGCGACTCCCCGGAATCTTATGGC
CTCGGCAAAGCTGAAGAGCTGTTTGGCGAGGAGATCAGTGAAGAGGATAAAGAGACAGAATCTACCGATA
TGACCAAGTGGCAGATCTTTGTTGAGTATGTGCTGAAAAACAAAGTGATCTGGCTGCTGTGCTTTGCCAA
CATTTTCCTCTATGTGGTGCGTATTGGTATCGACCAGTGGTCAACCGTGTATGCGTTCCAGGAACTGAAA
CTCTCTAAAGCGGTGGCGATTCAGGGCTTTACGCTGTTTGAAGCTGGTGCGCTGGTCGGTACGCTGCTGT
GGGGCTGGCTCTCTGACCTGGCGAACGGTCGCCGTGGCCTGGTGGCCTGTATCGCGCTGGCGCTGATTAT
CGCCACGCTCGGTGTGTATCAACACGCCAGCAACGAATATATCTACCTGGCTTCTCTCTTTGCGTTGGGT
TTCCTGGTCTTTGGCCCGCAATTGTTGATTGGCGTGGCGGCTGTTGGCTTTGTACCTAAAAAAGCGATTG
GCGCTGCCGATGGTATTAAAGGCACCTTCGCTTACCTGATTGGTGACAGCTTTGCCAAGTTAGGGCTGGG
GATGATTGCCGATGGTACGCCGGTATTCGGCCTTACCGGCTGGGCAGGCACCTTCGCCGCGCTGGATATC
GCCGCGATTGGTTGTATCTGCCTGATGGCGATAGTGGCGGTGATGGAAGAACGCAAAATCCGTCGCGAGA
AAAAAATTCAGCAGTTGACAGTGGCATAAACGTAACTGGTGACTTTTGCCCGGCATGACGCCGGGCTTTT
TTTATTATTCCGTGAATTCCAGCGTAGTGAAGGCAAACTTCTCGCCATCAAACAGCCCCTGACTGGTTAG
TTTCAGCGCGGGGATCACTGGCAGGGAAAGAAACGCCATCTGAATAAACGGCTCATCCGGTAACGGACCG
CATTCACGGGCGGCGGCTTTCAAGGCGTCAATTTGCTCCGCCAGTGACTGAGCCGTGTCGGTGCTCATTA
GCCCGGCAATGGGCAACGGTAGATGACTTTGTACCTGGCCGTTACGGACCACGCACAGCCCGCCGCCATC
CTGAATCACCTGATTGACCGCCAGCGCCATTTCTTCTGCGCTACGACCGATCACCACAATATTATGGCTG
TCATGGCTGACCGTCGCCGCCAGCGCACCTTCATTCAGGCCAAAGCCGCCGAGCAAACCACAGGCCGGAG
CCAGTCGTTGTCCGTAACGCTCAAGAACGGCAATAAAGCACACATCATCGCGATCAAAACCGTTTTCGCT
GTAGACGCTGGAGCGGGAGTGCGTGATCAGTTCGTTATGGATTACCTCAATAACGCGATAGCGTTTTCCG
GGGGTAAATTGCAGGGCAAAGTCGCTGGCGGAAACTGGCTGGCGATCAATGGTATTGCCATATGGCGGGG
CGGATTGTGCCAGTCTCGCCGACTCTTCCGCCTGTAAGGTTTGTGCATCGATCGGCTCGCCTTTCACCAG
TACCTGCTGCACCGTGACCTTACGCGCATCGCTCAACAGGACGATATCGGCCTGCTTGCCGGGTGCCAGT
AAGCCGAGGTGATTCAGACCAAAATGGCGCGCCGTCGACCAGCTGGCTACGCGATATGCCACATGCAGCG
GTACATTGTGTTGTTCGATCAGGCGGCGAATTAAGGCATCGATGTGTCCTTCATGGGCGATCTCCCACGG
GTTACGGTCATCGGTACAGAGCATGCATTGCGGGCTGTTAAATTCGTTGATCAACGGTGCCAGCGCGTTG
AGATTGCGGGCTGCGGACCCTTCACGGATCATCAATGACATGCCGAGTTGCAATTTCCGGCGTCCTTCTT
CCAACTGATAACTTTCGTGGCAGTTTTCAATACCCGCAGCAATATAGGCGTTAAGTTCTTTACCACCCAA
ACCCGGGCAGTGACCGTCCAGTGTCAGGTGGCGAAATGCGTCCAGTTTATCGAGCAGCGCATTCTGCCCG
CTAATTACGCCAGGGTAGTCCATCATTTCTGCAAGGCCGGTAACCTGCGGATGGTCCCGCCAGGCGAGCA
TCTGTTCAAGGGTAAAACTGGCACCGTTAACATCGCAGCCTTTTCCAGGGCGGGTACGCAAGAGCTGACC
TGTAAGTACTGGTTTTGCCTTGCCTGTTCGGCACAGCGGGCAAACCAGGCGAATCCGGCTTCTCCCATCA
CGTTGACGATTTCATGAGGGTCGCAAATAACGGTCGTCAGGCCGCGCGGCAGGGTCGCGGTTTCAAAAGT
GACTGGCGTCATCATGCTGGATTCAATATGCAGGTGAGCATCAATAAACCCTGGCACCGCCGTTGCGCCG
CGGGCATCAATCCGCTGCAAAGCCGGAGCATCAGCGTATTCTGCGCCAACACCGGCAATGTAACGTCCTT
TAATCACAATTGGGCCGGAAATTTCTCCGCCATTGATCAGGTCGAGAATAGAGACATTATCAATAATATA
ATCGGCAACAGCGTCTCCACGGGAAACGGCTAACAATTCCTGGTATTCAGCCCGGCTAATGTGATGAAAT
TTATGGTTAATAGAATTATTCATATTTTTTCTCATTTTGATTTTATCAATTTGATTATTATTTATCATAA
AGAAATATCGCGAGATTATTAAAGAATATCCATTAATGTGCAATTGAAATGTGATAATTATCACTGAACC
GTTGTTGTCATTTGTTTTACAAAAGCAAGGGATTAAATCTCCTCCAATGGACAAAAAAATGAATAATGAC
AATACCGATTACGTGAGTAATGAATCAGGGACGCTTTCGCGATTATTTAAACTACCTCAGCATGGGACCA
CCGTCCGCACAGAATTGATTGCGGGGATGACCACTTTTTTAACCATGGTGTACATCGTTTTTGTGAACCC
GCAAATCCTCGGCGCGGCACAAATGGACCCAAAAGTGGTGTTTGTTACCACCTGTTTGATTGCCGGTATC
GGCAGTATTGCGATGGGGATATTTGCTAACTTACCCGTGGCACTGGCTCCGGCAATGGACCTGAACGCCT
TCTTTGCCTTCGTGGTCGTGGGGGCGATGGGTATCTCCTGGCAGACCGGGATGGGCGCGATATTCTGGGG
CGCAGTTGGGCTATTTTTGCTCACGCTGTTTCGTATCCGGTACTGGATGATCTCCAACATTCCATTAAGT
TTACGTATTGGTATCACCAGCGGGATCGGATTATTTATCGCCTTAATGGGATTAAAAAACACTGGCGTTA
TTGTCGCCAATAAAGACACACTGGTGATGATTGGCGATTTAAGTTCTCACGGCGTGTTGTTAGGTATTTT
AGGTTTTTTTATTATAACCGTGTTGTCATCACGTCATTTTCATGCCGCGGTGCTTGTTTCTATTGTGGTG
ACGTCTTGCTGTGGATTATTTTTCGGTGATGTTCATTTTAGCGGTGTCTATTCCATTCCGCCTGATATTA
GCGGCGTCATTGGTGAAGTGGATTTGAGCGGTGCGTTATCACTTGAACTCGCCGGTATCATTTTCTCCTT
TATGCTGATCAACTTATTTGATTCATCAGGAACATTAATTGGTGTGACTGATAAAGCTGGCTTAATAGAT
AGTAACGGTAAATTCCCCAATATGAATAAGGCGCTGTATGTTGATAGCGTCAGTTCGGTGGCGGGTGCGT
TTATCGGTACCTCGTCTGTTACCGCTTATATTGAAAGTACTTCAGGTGTGGCTGTCGGTGGTCGCACGGG
GCTGACGGCTGTCGTAGTCGGCGTTATGTTCCTGTTAGTTATGTTCTTCTCACCGCTGGTGGCGATGGTT
CCTCCTTACGCAACCGCCGGAGCGTTAATCTTTGTTGGCGTGCTGATGACTTCAAGCCTGGCGCGCGTTA
ACTGGGATGATTTTACCGAATCGGTGCCTGCGTTTATTACCACGGTGATGATGCCCTTTACTTTCTCGAT
CACCGAAGGGATTGCACTAGGCTTTATGTCGTACTGCATCATGAAAGTGTGCACCGGGCGCTGGCGCGAT
CTGAACCTGTGTGTGGTGGTGGTCGCAACTCTGTTTGCACTGAAGATTATTCTGGTGGATTAGTAACTGG
CGAGGGTTTCCAGATATCATGAGTTCTGATTACGCAGGAGAACTCATGATCTGGATAATGCTCGCCACGC
TGGCGGTAGTGTTTGTGGTTGGTTTTCGGGTGCTGACATCCGGGGCCAGAAAAGCGATTCGCCGTCTCAG
CGATCGGCTGAACATCGATGTCGTACCCGTGGAGTCGATGGTCGATCAAATGGGAAAGTCAGCCGGTGAC
GAATTTTTACGTTATTTGCATCGCCCGGATGAGTCGCACCTGCAAAACGCCGCGCAGGTGTTGCTCATCT
GGCAAATTGTCATTGTCGATGGTAGCGAACAGAACCTGCTGCAATGGCATCGGATTTTACAAAAAGCCCG
CCTTGCCGCGCCGATTACCGATGCTCAGGTCAGGCTGGCGCTGGGTTTTCTGCGCGAAACCGAACCTGAA
ATGCAGGATATCAATGCTTTTCAGATGCGCTATAACGCGTTCTTTCAGCCTGCCGAGGGCGTTCACTGGC
TGCATTAAAACCGCTTCGTCTTATCAGCCTACAGACCGCGCCTGACCTGGTGGGTGGATAAGACGTTCAC
ACCGCATCCGGTAATCTTTGCCCTGTTCCGTTTCGATCTTAACTCCAGCTCAAGCAACACCGTAAAAGTT
GCAAAAACGTTAAATACGTCACACATTTCAATGTTAAAGTGGTCGGCTTTCCCTCTGAAACATGCCACGG
GTAACACCATGAGTGAATTTATTGCTGAAAACCGCGGCGCGGATGCCATCACCCGACCGAACTGGTCAGC
CGTTTTCTCAGTGGCGTTTTGCGTCGCCTGTCTGATTATCGTTGAGTTTTTGCCTGTCAGTTTGTTGACG
CCAATGGCCCAGGATTTAGGCATTTCGGAAGGGGTTGCCGGCCAATCGGTGACCGTAACCGCCTTTGTGG
CGATGTTTGCTAGTTTGTTTATTACCCAGACCATTCAGGCCACTGACCGCCGCTACGTTGTCATTCTGTT
CGCCGTTTTGCTGACGCTTTCCTGTTTGCTGGTTTCCTTTGCCAACTCATTCAGTCTGCTGTTAATCGGT
CGCGCCTGTCTGGGGCTGGCGCTGGGCGGGTTCTGGGCGATATCGGCGTCGCTGACCATGCGTCTGGTAC
CGCCGCGTACGGTGCCGAAGGCGCTGTCGGTGATCTTCGGCGCGGTTTCTATTGCGCTGGTGATTGCTGC
GCCGTTGGGCGGTTTTTTAGGCGAGCTTATCGGTTGGCGCAATGTCTTTAATGCGGCGGCGGCGATGGGT
GTGCTGTGTATTTTCTGGATTATCAAATCACTGCCTTCGCTGCCAGGTGAACCTTCGCATCAGAAACAAA
ATACTTTCCGCTTATTACAACGTCCGGGAGTGATGGCCGGGATGATCGCCATCTTTATGTCCTTTGCCGG
ACAGTTTGCTTTTTTCACTTATATTCGCCCAGTGTATATGAATCTGGCGGGATTCGGTGTTGATGGCTTA
ACCCTGGTGCTGCTGAGTTTTGGTATCGCCAGCTTTGTCGGGACATCGCTTTCGTCGTTTATTCTCAAAC
GTTCGGTGAAACTGGCCTTAGCGGGCGCACCGTTTGTGCTCGCCCTGAGCGCGCTGGTACTGACGCTGTG
GGGAAGCGATAAAATTGTTGCTACTGGTGTGGCGATTATCTGGGGGCTGACCTTTGCTTTAATTCCCGTT
GGCTGGTCAACGTGGATCACTCGCTCACTGGCCGATCAGGCAGAAAAAGCCGGATCTATTCAGGTGGCCG
TTATTCAGCTTGCCAATACCTGCGGTGCGGCAATCGGCGGTTATGCGTTGGATAACATTGGTCTGACTTC
GCCGCTGATGTTGTCCGGCACATTGATGTTGCTGACTGCATTGTTGGTAACTGCAAAGGTGAAAATGAAG
AAATCCTGATATCAGGTAAAGAAGCGTTGGTCAGTGGTTGTTGCCGTTCTTACATATCCGGGCATTCTAC
CTTACCCAACGCTTCCCAATAATTGCTCTGATTATTACGTTCCATCGCCACGATGGCCTCGCGTATATGT
TGTTTATTGTTTTCATCTGACAACATTAACTTTTCCCACGCTTCATCGGATAATGACGCCTGTGGCGTGC
AAATTTTACGTAAATCTTGCAATACCGTGGTTTTCTCTTTTGCCGACTGTAGAGAACTGAATGGCGACTC
GGCCTGAGAAATGGCTGGAAAAATCAGGAATACGGTAATCATGAGTAGCATCGTTGGCTTCATAGCGGCA
ACCTTCTGCAAATGTGCATCGAATGAAGCATAAGTGTAGTTTGCTTTTGCCGCTCTCATCATGCTGTACG
AAAGGTGTTTGCGTGGTCAGTAAGAAGTGCCAGACTTTATATTCCACTTTTATTCCTTTTTATTCTTATC
GATAGCGTTTTGTTTTTTAAACTGCAGCGACCTTACCGCTATAGTCCGGTAATCATTAATAAAAGGATAA
AAAAATGAAACTGACAACACATCATCTACGGGCGGGGGCCGCATTATTACTGGCAGGAGTTCTGCTGGCA
GGTTGCGACCAGAGCAGCAGCGATGAAAAGCATATTAAAGTTGGCGTTATTAATGGCGCAGAACAAGATG
TCGCGGAAGTCGCTAAAAAGGTAGCAAAAGAGAAATATGGCCTCGATGTTGAACTGGTAGGATTTAGCGG
TTCGTTGCTACCGAACGATGCGACAAATCATGGCGAGCTTGATGCGAACGTCTTCCAGCATCGACCCTTT
CTTGAACAAGATAATCAGACGCATGGTTATAAACTGGTAGCGGTGGGAAATACGTTTGTCTTCCCCATGG
CGGGCTATTCCAAAAAAATCAAAACCGTGGCGCAAATAAAAGAAGGTGCGACAGTGGCGATCCCCAACGA
CCCGACTAACCTTGGTCGCGCGCTTTTACTGCTGCAAAAAGAGAAGCTAATTACTCTGAAAGAGGGAAAA
GGGTTATTACCTACCGCGTTGGATATAACCGATAATCCACGCCATTTGCAGATAATGGAGCTGGAAGGGG
CACAGTTGCCACGTGTACTGGACGACCCGAAAGTGGATGTAGCGATTATCAGCACCACTTACATCCAGCA
AACAGGACTTTCTCCGGTTAACGACAGCGTATTTATTGAAGATAAAAATTCGCCGTATGTGAATATTCTG
GTGGCACGGGAAGATAATAAGAATGCAGAAAACGTGAAGGAATTTCTGCAATCTTATCAATCACCCGAAG
TCGCTAAAGCGGCAGAAACCATCTTTAACGGTGGCGCGGTGCCTGGCTGGTAATTCTCACTCATGCCGCG
CCGGACGATTTATTTTTCTGGCGCGGCGGCGGGAATCCATTGAAATCAAAATCACCGATGACAGAATCAG
CAGCGTTCCCAGCCAGTCCGGCAATGTGAAGGTGATCCCCAGCAACAGCAAAGAGAGCAGCGCGCTACTT
AATGGTTCAGCACAGCTTAAAATGCTGGCTTTTGGACCGCCAATTAATTGTGCTCCTTTTAGGTACAGAC
TAAATGTCAGGGACGTACCAATGACCACCAAATAAAAAAACGCCAGAATCAAACTTCCGTTAACGACAAA
ATTTGTCCCTTGTCCGGCATAAAAGGGCAGCAAGATCAGACCGCCAATGAGCATACTCCAGCCGACGACC
GGTAACGTGCCATAGCGGGCAATCAGCATTGAGGGATAGGTGGTATAGAATGCAGCAGCAAATGCCGAGG
CAATGCCCCAGAATAACGCGGCAGGAGAGATCGATAATGACGTCGGATTACCGTGTGTCACCAATAAAAA
AGTCCCGATCAGAGATGTCAAAATAGCGCAGAAAACCAGAATGCCCGGGCGGGATTTACGCACCAGTGAG
AACCAGGCGACGATAATAGTCGGTGAGAGGAATTGCAGCACCGTTGCCGTGGCTGCGTTCGATTTTTCGA
TGGTTAGCAAAAAAGTGAGCTGTACGGTTAGCGCGCCAACCACGGAAAAAATCAGTAGGCTAATGGCATC
TTTGTGATTGTTAATAATAGAAAAGATTTTATCACCATGAACAAATGATAGCGTCAGCAGAATCAAACCG
GCGAATATCAAACGCGTCATAGTCAAAAACTGCGACGACATCTGGCTTTGCTCCATGATGTATTGCGCGC
AGACCCCTGAACTTCCCCACAACACGGCGGCAATCAGAACGTTCAGCATCCCCTTTCTGGTGGAACCCAT
TTTTCCCTCTGCATACTGTTTTGTCGTTTATGTATGCAGGCATGATAGCAAAAATGGCGAGGATGGCTCA
GTTTGCGCCACGCCGATTTTTCTTAGCCCAGACTGGTGAGCTAAATATCTTTAATAAACAGCAAGCAAAT
CATTGCAATACCCAACATCCCTATCGCCAGCCAGAACAACGTGTGGTAGCTCCAGATTTCAACCATAATT
TCGTCAACAGAGCCGGCGATAATCTAGCCGAAGCGTGAGGTATTTGCATATAACGTTGTTGCGGAACCTA
TTCTTATTTATCGGAGTGCCTTGCCAGTAATTTACTGACGAGGATCCTCATAATAGCGTTACCCATCTGT
TGCATTGAGCCTTTACAGGCCGTTATTCTAAATGACCAAAATTAAATCAGTGCATAAGGGGAAGTATTCT
GTAGTGATGTCTCCCTGAGATGCAGGTTCCACTGGAGAAAATTATGAGCAGTTTGTTTCAGAATGAAATA
AAGGATAAATTTAAAACTGGACTTGCATATGTGCGGGGGCCAGAAAAAAGCGGATCTTCCGCTCAAAATG
CAGGTAGCGAAGGTGGTAAAAATGCGCCGGGAGAAGCAGAAGATTGTCCCGCGATGTCCGTTTGAGAAAC
ACGAGTTTGATTAAACGCGTGAGCATGATGATATTAGTAGCTGACCAGAGAAATTATATCCGTCGTAAGC
AATAAAAATCAGAAGTGATGTTATGGATATTTTTAACCTGAATAACTCCGTAAGTACGGGGTTATTCAGG
TTTTTGCTAGCCTGTGCTTTTCTATACCAGATGTGGTGTGAACACTCTATTCTGCATACAAATTAAATAT
ATTGTAGGATCTAATATAAGTCTGATAATCCTAATAGACTGAGTAAGATTCTGGTTGATAATAGCTGATG
TCCTTTTCAGCTATTAATGTGTTTATTTAGCGTGAAATTATACTCGTATTTTTATAACTTTATGAGATTG
CCAGATTTGGTCGATAAATAATAAGGCCAGTGACAGACTTACTTATTAGGGACAAATTTCGCGAGGATAT
CAGGTTCACTGGCAACATAAATGCTTTCATCAGGCAGAGTTACAATTCCTTCAGGTTGGGGCAAATCACT
GGTCAGAGAATGATTTCCTTTTGTCAGGTCAAGCATCTCAATGAAAGACATCTCTGTCAGGTTAAACTTG
AGTAATTTACGCGATTCATCGGACAGAATCATCAGACTTTCATTATTAAAGGCCAGGCCGGATATATCGT
TAACACGTATATCATTTAGTGCCTCTGGAATAGTTGCTTGCTTTACACTCAGCAGGTCTGAAGAAAGTTG
ATATATAAATATTTTACTTGGGCGTCTTTCTTTTGCGACAAACAGCATCCGATCATCTGCTTTCCATGCC
AGCCCTTCAAACCCTCTATTCTTTTTATTGAATTTTTCTAACTGAATTTTATTTCGAAAGGAGATATGCA
TATCTTTTGTAACTGTAAAAAAGAATAGTTCAGAAGTCTTTTCGTCTACTGCAGCAAAAATGTTCCCTTG
TATGTGTTCAATTGTTTCAGCATCAGAGATAAAAGGCAGCGGGGCTCTGTCCATGATGTCGCCACTTTTG
GTTATTTTAAGTAGCTGTGCAGGGCTATTCTGGGTGGCATACAGGAAATCATCCTCTTTATTATAAGTAA
GAGATGATAAGTTCACCGTATTTGGTAATTGTTTTATAAATGAAAGTGAGTGTTCTTGAGGTGATTTTTT
GTAAGTACAATTAAATGGAAATAATATTAATATGGTTAGCATAATAAATATCGCAATGAAAAATGCAATT
AATGGTTTTCTTTTCATTTTCTCTATTTACTGTAAATTGTTTGCAGAACAAATATTTTTGTTTGATTGTA
ATTAACTTCAGGATAAATTGTTAATAATTGTGGGTGTGATTTCTATTATTGGTTTTGATTAATAAAGTTT
TATTTTAAGTGTTTTGTAAGTACGTTTCAGATGCGGCATACCTTGGTTGTAGCGCTCTTACCATTTCATC
GATTGTACATTTCACACCTTGCGGCACTTCATAAGAAGTCCTGTTCGTCAACATGCCCATCTCGTTGGGG
CGGTCTTCTGGCGCCATTATCAGAACCCCGGTATGGCTGGTAACATAAATGTTTCCATCTGATGATTGAG
AGATACTGATGTTAATGCAAGCGTTAGGTGTATCTAACGATCTTTCCGCATTGTATTCACTGGCTTTAGA
GATCCTTTCATGTGTCAACGTTAAGGCTGGCACATTGAAAGATTGATAGAAAGCCGAGCATATGGCCGTT
GCTGCTTCTGGATGGCATAAAAATTCCACAACTTCAGCTTTCTGATTATCGCTGCCGCTGCTTTCTCTTG
CTATTTGCTCTGCATCATGGCGAGAAATACCATGATCTATAACATTCCGGGAAGGTGATGAGTGTGTGTC
TTTAAGTCCTAGTGCATCGCGAAGCAACATTTGTGCATTTGCAGGTATATCAACACCATTGAGTGAAAGC
TTTGCATTGCCGAGTCCTCGACATGTATCCATAAAGATAGAGCTGAATGGTGTAGGCCCGGAAAGCGGAT
CTGTTTGAGCATTATGAGGAATCAAGGTTGTTGATAGTTTTGACGTAAAACCAAGTAGATTGCGCATTGA
GGTAGTATCAGTCAGGTCCATCTCAGATAAGGCACGATGAACCTGAATGTATGGCATGTGGCGATCGATG
GGTAAAGATTGTAATAACCTATTTTGTTCGTTTGACTCCAGGAGCACAGTAATCTTTTCATTATCTGGTG
TGCGAATCTCGGCTTCAATACTTTCGCTGTTAGTGACGGAAATTCTTAAGGATGAGCCATCTGAAAAACG
AGCAGATACTCTGCCTAATTCATTGGGAAGTGGATATACAGGCTCTAAAACGGTTAACAACTCTTGAAAT
GATTGTCTTTCACTACGACTGTACGTTGGATTCCATAAACCAAAACTAAGTACTTTAAGTAACTTTTCAG
CGCATGACATCTCATCCCAGCTTTTTTTAAACCCAGAATTAACTTTCATTGCAGCATCTAAAACTAAAGA
TGCGGAGTCATTATTAAGTCCATTTATCATGAGAGATTCTCCTATCTGGTTTGTAATGAACAATTTGGCA
ACAAGTATCATATAGCATCATATAGTGTCAATAATATACAAGATATTTATAGCGGGTGTTTTAAACGCAT
AGAAAGTTATTTTTACCTTCTGAAAAATAAGTGAAAATATTAATCTAATGATGGATAATTGATTGCAAGT
GATGCGTCAGCCATAGTTTTTGTGTCTATGAAAAGGTTGTACTTATTTACATAAGTAATAGAATTTAGAT
AATTTTTTATTGTGACGATAAAATATACCATTAATGATTGATTTAGAGATACTGGCTTTCAGGAAACTTA
TTTTGGCCTGTATATAATGTGATGATTACTAAAGTGGTACATTGATATCAGTTAGCTTTCCCTTTTCAAG
TTGCCTTATCAAAGAATTCTCTTTATAGAGGGGCGCATTGTTCTGATTAACATAAACCTGTTGTGGCATT
ACACCGATCGATAGGTGCGACAAAGAACAGGGTTAATGAATTTGTAACCAGTCCCACCTTAGCGCTATGC
ACTTTTGAATCACAGATCTTGCTAATCGTTTGTCCGACTTTAACAGAGTTAATGACGGCGATGATCTGAT
GCCAAGTAAAACGGACTTGATGTATGGCAGATCCTCTTTCGCCGAATGGATATGGGCAATACTTCTTAAT
ACGAATGGTACGGTTATGCGGGAAGAGACTAACGCGGTTACTTGTTCAGCTATTTGTCCCTTGTTCCTTT
TTATAATGCACCCGTTCCAGGTTAGTGCTGGCTGTAGCTTATGTCCGGGAGACAGCTAATAGATATATAT
ACTCGTCATACTTCAAGTTGCATGTGCTGCGACTGCGTTCGCTTACCCCAATCACTTACTTATGTAAGCT
CCTGGGGATTCACTCGCTTGCCGCCTTCCTGTAACTCGAATTAAGTAGAGTATAGTGAAACGGTTCAGCT
TGGTTTTTATTCTGTTTTATTTGTTTATGCAATGAGATCTATCTTATAAAGAGAAACGCTTAACTAAATG
GAAATGCAATTATTAAAGTCGTTTGTTAACGAGATGGTTTTCTTCTATATCATTGATTTTAAATGGATTT
TAAAAATATATGATTTTTTTTGTTGACATTTAATGATAATGTATTTTACACATTAGAAAACAGAGAATAA
TAACATTTTAAGGTGGTTGTTTGATGAAATAGATGTGTCCTAATTTGATAGATAAACGTTATCTCACATA
ATTTATATCATTTGATTAATTGTTGTCCTTCCTGATAAGGATAAGGTCGCTAATAGCTTAAAATATTAAA
GCATGCGGAGATTATTTATTATGAATATGGAAACTAATTCACATACAACAAGTCCATACATTCAGCTTAT
AGAGCAAATTGCAGTTCTACAGCAGGAAGCAAAGCGACTGCGAGAGCAGGAAGTTCAAAGTGTAATTGAG
TCGATTCAGAAGCAGATTACTTATTACAATATAACCTTACAAGAGCTGGGATATACTAATGTGCCTGATG
ATGGACTCGCTCGCCGGAACTCATCGAAAGGTGTTTACTACCGCAATGAAGAAGGGCAGACCTGGTCGGG
CGTAGGCCGACAGCCACGCTGGCTTAAAGAAGCACTGTTGAATGGAATGAAGAAAGAAGATTTTCTTGTG
AAGGACACTGAAGAAGAAATAATACCGCTGAAAAATATTTAACATAAAATAATTAAATGATAACGATAAC
TGAGCTGGAAGACGAAATAATAAAAAATAAAGAAGCCGCAAATGTTTTTATTGAAAAAATAAACGACAAA
AAGAACGAAATCCATGAAAAAATGAAACACCCTTTGGATAAAGTTACCTACAATGAAGCAAAGGAACTGC
TCATTGCGTGTGATGCGGCAATTAGGACTATAGAGATAATGCGAATCAGGATTAATAATAAATAGAGGAT
GAGTATTGTGAGCCAAACAAGAAATAAAGAACTATTAGATAAAAAAATAAGATCAGAAATTGAGGCGATA
AAAAAAATAATCGCCGAATTTGATGTCGTAAAAGAAAGCGTTAATGAGTTAAGTGAAAAAGCAAAAACAG
ATCCTCAGGCGGCAGAAAAATTAAACAAATTAATTGAGGGGTACACATATGGTGAAGAGCGAAAATTATA
TGATTCTGCCCTAAGTAAGATTGAAAAACTAATAGAGACACTGAGTCCAGCAAGATCTAAAAGCCAATCA
ACAATGAATCAACGGAATAGAAATAATAGAAAAATAGTATGACAATTTTTAATAAAATAGACTATAACTA
CTATAAATTAATTAATTATCCAATCATGATGGTTCATGATGAATGGCTAGGTGATTTAACCGGTGTCAAT
CAGGTCAGTTTTCGGCGTTTAAGAGAAACTAGTTCTACTCGTAATCAACTCAATAAGATATTGCGTCAGG
AGATACAAGATAAAATTTCTGGTGTGGAATTATCTGACATAAATAAGGAAGGTTTTTTATATCAGTCAAT
TGGGAAAATAAGATTGCTTGCTCTAAGTAGTGCATTATTTGACATTCAATGCCCTGATTATATTTTCTCA
CGATTATATCGAGAAACTCTGATTAGAGAGATAGGATATCAAAATGTGAAGCAGTTATCATTCTATTGGC
AGGGAGGGCAATGTAAACCAGAATATGGTGAAGAACGGTTTTGTGCTGAGTTAATAAAATACGGTGCAGG
AAATTTGGAGTGGCTATTTGCTGATAATCCTTTATGGACCATAGTCAAATATCTTTTACCGAAAAGTGGA
GAAATAAAACCAACTCATATTAATGATTTATTTCTTAACAGACTTAATAAAATTTTATTGCCTTATGAAA
CTTTATGAATTTAAAAATATAGAAATTGATTTAGTGCTTACAGAAGATATCATACCAGAGGATAAGTTAC
AGGAAATTATTCAATCTGATGATATTATCAAACTGGCTCGAAAAAAAACATATGAACATTTACTGAGGGC
GAGGAGGAAATCGAAAGAATTAAAGATAGAATCCAGAAAAAAAATTGCCAGAAAAATGATTGCAATGAGA
GAAAGGATTCGAAAAAATAATAAAATAAAATTAGATAAAGAGGTTAACCAATCGATAAAATGGGTTAAAG
ATATCCAGGCTATCGAGTTGGTCTTAATGCAGGACATAATGAATAAGGTTCATTTGTCACTGACTAATGC
ATTACATTCTTTAGATACATCATCAAGAATTAATTGGGATGATTTACTTAATGAAGTTGTAAGGGAAACT
CTATCTAATAACAATATTGTCGGAGCTATTAAGATCACTAAAAATCCAGACATTAAACTTGATCCTGGCG
AGGCCAACAATATACAGCTTATTAATGATGCAAACACACCGCATAATAAAATTATAATAGAAAATGAATA
TATTAGAATAACTTTAGACCCATTAGAGCAAATAAGTATTTTATTGAATTCATTTAAAGATAATTATCTT
AGCATTATTCAGGAATGATGATATGTCTCAATTAATGACCATTGGCTCACAGCCAATATTTTTAATTATT
GTATTTTTTCTGTTATCATTACTGCCAATATTTGTTGTTATTGGTACTTCATTCCTGAAAATTTCTATTG
TACTGGGGATATTGAAGAACGCATTAGGCATTCAACAGGTACCACCAAACATGGCGCTAACATCAGTGTC
TTTGATACTGACAATGTTTATTATGTCTCCGATAATATTACAGATAAATGATAATATTTCTCAGGAACCA
ATCAATTATACCGACTCTGATTTTTTTCAAAAAGTTGATGAGAAAATATTATCACCATATCGCGGTTTTT
TAGAAAAAAATACAGAGAAAGACAATGTAGAGTTTTTTGAACGTGCAGCTCAAAAAAAATTGGGTAATGA
AACTATCTTAAAAAAAGACTCTCTATTTATACTGTTACCGGCTTTCACGATGGGGCAGCTTGAAGCTGCA
TTCAAGATAGGTTTTTTGCTCTATTTACCCTTTATTGCGATAGATTTGATCATTTCCAATATCTTATTGG
CCTTGGGTATGATGATGGTATCGCCAGTAACAATTTCGATTCCTTTTAAGATCTTGTTATTCATTCTTGT
TGGAGGCTGGCAAAAATTATTCGAATTTCTGTTGGTGGTGAATTGATGGATACTGGATATTTTGTTCAAT
TATGTGTGCAAACGTTCTGGATAATATTTATCCTCTCATTGCCTACAGTCATAGCGGCCTCTGTTATCGG
TATTATTATTAGTCTGGTCCAGGCTATAACGCAGTTACAGGATCAAACATTGCCTTTTTTGCTAAAAATA
ATAGCAGTGTTTGCTACGCTTGCCCTGACTTATCACTGGATGGGAACAACAATCATCAACTTCTCGTCGA
TAATATTTGAAATGATTCCGAAGGTGAACGGCTAATGAATGAGATAATGACGGTCATAGTATCATCATTT
TATTGTATACTCAGGCCGCTGGGGATGTTTATTATCCTACCAATATTTTCAACAGGTGTTTTGCTCAGTA
ACTTTATTCGCAACTCAATTATGATTGCGTTTACGCTTCCGATCATAGTAGAGAACTATACATTTTCGGA
AAAATTGCCATCTGGAATCTTTCAGTTGACAGGAATAGTGCTAAAAGAAATAAGTATTGGTTTTTTCATT
GGGTTATCATTTACTATTCTTTTTTGGGCAATAGATGCGGCTGGGCAGATTATTGATACTCTAAGAGGTT
CAACAATATCTTCAATTTTTAACCCGTCCATAAGTGATTCATCTTCTATCACTGGCGTTATTTTGTACCA
ATTTATCTCTGTGATCTTTGTTATTCATGGTGGGATACAAAGCATTCTGGATAAGCTATATTTATCCTAC
GAGATATTACCATTACAAGCCGATATTGCATTCAATCGTGCTTTAATAGATTTTTTGTTTTCTCTATGGG
ATTCATTTATTAAACTGATGTTATCATTTTCAGTTCCCATGATTATCGGTATATTCTTATGTGATATGGG
GTTTGGGTTTCTTAACAAAACAGCGCCTCAACTAAACGTATTCACATTATCACTGCCAGTAAAAAGTTTG
ATAGCAATCTTTATATTGCTATTAGTTATTCATGTTTTTCCTGATTTTATTACGGCAAATATTCATTCTG
ACATAATTGATAGATCGTTACCGAGCATGATTAATGAGTGAAAAAACAGAAAAGCCCACACCCAAAAAAC
TGAGGGATCTAAAAAAGAAGGGCGATGTAACAAAAAGTGAAGAGGTAATGGCTGCAGTGCAGTCATTAAT
CTTATTTTCATTTTTTTCTTTATATGGCATGAGTTTTTTTGTTGATATAGTTGGGTTAGTTAATACGACA
ATAGACTCGCTAAATAGACCGTTTTTGTATGCCATTCGAGAAATATTAGGTGCGGTGTTAAATATATTTT
TATTATATATTTTGCCAATTTCTTTGATTGTCTTTGTTGGAACTGTTACGACTGGTGTATCACAAATAGG
ATTCATCTTTGCGGTTGAAAAAATAAAACCATCGGCTCAGAAGATTAGTGTAAAAAATAACCTGAAAAAT
ATTTTTTCTGTAAAGAGCATTTTTGAGCTACTTAAATCAGTATTTAAGTTAGTGATAATTGTTCTCATTT
TTTATTTTATGGGGCATTCATATGCAAATGAGTTTGCTAATTTCACAGGACTGAACGCATATCAAGCTCT
TGTCGTTGTTGCCTTTTTTGTTTTTCTTTTATGGAAAGGCGTGCTATTCGGATATCTACTCTTTTCAGTA
TTTGATTTCTGGTTCCAGAAGCATGAGGGACTGAAGAAAATGAAAATGAGTAAAGATGAGGTGAAACGAG
AAGCCAAGGATACTGATGGTAACCCTGAAATTAAAGGGGAGCGCCGTCGCCTTCATTCCGAGATACAAAG
TGGAAGTTTGGCGAATAACATCAAAAAATCAACCGTTATTGTTAAAAACCCGACTCACATTGCGATTTGC
CTATACTATAAACTTGGGGAGACTCCATTACCTTTAGTTATTGAAACAGGAAAAGATGCCAAAGCTCTAC
AGATCATTAAACTGGCTGAACTCTATGATATTCCAGTGATTGAAGATATTCCTTTAGCAAGAAGTCTCTA
TAAGAATATACATAAAGGACAATATATAACAGAAGACTTTTTTGAACCTGTGGCACAATTGATTCGTATT
GCGATAGACCTTGATTATTAATCGATAATTTGCTCATTATTCTTTAATTTATTATATGTTTTATATATTT
TCATTGCGTATTGCCTTCTGAGTTCTACTGCATTTGGTGTATTAAAGTAACCTGCATTATACGCACCAAC
TGCATCCCATGTATTCCCTCTGTATTTTATGTTAGAGGCTAAGATATAACCAGCAACAGATATGTTTATA
CAGGCATTATTCAATAAATCATCTTCAGATATATTAAATTTGCTTAATAAATCTAAATGAGATGAATTAA
TTTGCATTATACCTATATCATACGTTCCGTTTTTGTTTGTTTTGCTTTTTATTCCGCTTTTGCATTTTGA
TTCATTCCATGCAATTGCTTTTAATATTAGTGGATCTATGTTATATGCTTTTCCTGTAATTTCAAAACAA
TCGGAAGCATTACAGTAATTTGAAATGAGAATGATACTCAGTATTATTTTTTTCATTTTTACGTTGTTAC
TCAATATTATTAATCAGAAATTACATATGTTAACCAGGGAAACAGCAGGTTGAAACATGAGTATATTTAA
TGATATATTACATTGCAATCTGGAGAAAAAGAAAGGTCTCCATTATTCTTGATATTGCTTATGGATAGAA
CAAATTGAAAGGAGTGAGGTTAGTATGAAACTGAGTGAGTTATGATTATGAAGGATGGCATCTATAGCAT
TATATTTATTAGCAATGAAGACTCCTGTGGGGAAGGTATACTGATTAAAAATGGAAATATGATCACTGGC
GGCGATATTGCTTCTGTGTATCAGGGGGTTCTCTCTGAAGATGAGGACATCATACTTCATGTCCATCGAT
ATAATTACGAAATTCCCTCGGTGCTAAACATTGAACAAGATTATCAATTAGTTATCCCTAAAAAAGTACT
GAGTAATGATAATAATCTCACATTACATTGCCATGTAAGAGGAAATGAAAAATTGTTTGTTGATGTTTAT
GCCAAATTTATAGAACCATTAATTATTAAAAACACAGGAATGCCACAAGTTTATTTAGAATAATTTTTAT
GTATGTTTTTTATGTCGATTTATTTATCAAATAAAAAGAATATGGAAAATGGAATCTAAAAATAAAAATG
GCGACTATGTAATTCCTGACTCAGTAAAGAATTACGATGGTGAACCTCTGTATATCTTGGTTTCTCTTTG
GTGTAAATTGCAGGAGAAATGGATTTCTCGCAATGATATTGCCGAAGCATTCGGTATAAACCTGAGGAGA
GCATCATTTATTATAACTTATATATCGAGAAGAAAAGAAAAAATTTCATTTCGTGTCAGATATGTTAGTT
ATGGTAATTTGCATTATAAGCGCCTTGAGATTTTCATTTATGATGTTAACCTTGAGGCGGTTCCGATAGA
AAGTCCTGGATCAACCGGACCAAAAAGAAAAACCTACCGAGTTGGTAATGGTATTGTGGGACAGTCTAAT
ATCTGGAACGAAATGATCTTGAGGCGGAAAAAGGAGAGTTAGACGTAATTTTTTGAGTATATTTTATAGA
AGAATAAAAATAAAGCTATATTTAAGGGTTTTGTTTTCCAGGGTAAGCCTTTTTCTCGGCTAAAGTTTGA
AGGTCATTTCCTGACAAATATACTCTGAGCTATAGATGATTGGAAAGATCAGATTTCTAATGCTAAGTTA
AGATATACAGATTGTTTCATAAACGGAAATGATATTAAATACAGCAGAAGATAGTTCAGGGCATAAAATC
CTGGTTAATGGAATAACCCCACACCTGTAGATAAATCTACCAGTGGTCGGTGCTCAACTTTGGGAGCACT
TCACTATAGCAGCTTTATTATTTCCGATAGAAAATCCCCAGTCAGCCTGGGGATTGGTATAGCTGATGGT
AGTTTTTACTCTGTATTACCTAACAATTTTTTAATATTTTCTTTATATGTAGTGTATTTTTCTTTTTCAT
TACACCACATTAAACAAGCCTTAAAGGCTTTCTTGGCCATTTTCTTATTTCCGACGAGTAAGTAGCTAAT
TCCAGAATAATAAGATGCCCTGGGATCTTGCATAACTAAAGTTGCACAGCGTGCGAAACACAGTTGTGCA
TCTTCATGATTTGATAAACGCTGATGGCATAAGCCCAGAGATAAGGTGTAGTCATAATTCCAGTGTTCCA
GATATGTGAGCAAATGGAATAGATTTCTTGCGGTTATTACATCACCAGATTGATATGCTGTATAGGCATA
AGAATGAAGGTCATTGAGATCTTGTTGTGTCAGATTTGTTAATGACGCTAATGTGCCACCATCCTGGTAG
AAATCATAAATATCCTCTAGAGAGCTAAATTTCCTGCTCATAAAGCCTCATTTATTATTCGCTAGATGCA
GATTTTATCGGGGTTGCTTTAATTAAAAAGAGTCGAACAACACTATGTTTTTGTTTTACCGTACTGGAGA
ATAAACTACCAATAACAGGAATGTCGCTTAACAGCGGTATACCATCTTTACTTGAACTTTCTTTATCTTG
GATAAATCCGCCAAGTAATAAACTTTCTCCTGCACTTAATGTCGCTTCTGTTGTCATTTCTGAATTTTGT
ACTTCAGGTAAGGTGCTGCTGGCATCCTGAGCATTGCTTTGGTTAGTCGATTGATTGCCATCCTGAATAT
CAAGTAACAAACGAACTCGTTCCCGACGTTTTCCGGTAAGACTATTCGAGCTGTCATCAAGTATACGTGG
TGTCACTCTCAGCAATGTTCCGCTTGTAATACTTTCCAGAGACGCCACCTTTTCTCCGGAGACTTTTGTA
TAAAACGTTACGTTTTTATCAAGAATCGCCTGCATATTATTTAAGGTTATAATTGACGGCTGAGAGAGTA
TTTTAGCTTTCGAGTTCTGTTGTAACGCATTCACCCTAATCATAAAATTACTGGCATTACTTATCACAGA
AGAGCTGATATTAGCCTGTGCGGTAGAGCTATTAAAGGCAATCGTACCTTGTCCTGCATTTAACGTACCG
GACCAGTTTACGCCGAGCTGCTGAAGATCGTTTGCATCAACATCAATAATTGAGACAGAAATTTCAATTT
GCCTTTGTTCAATATCAAGCTCAGAAATTAATTGCTGATAGATATCCATCGTTATTTCGCGGTCTTTTAC
AACAACTGCATTAAGACGTGGATCAGCGGAAATCGTTACACTGTTATCAAACAGGTTACCGCTTCGCTCG
ACGGCACCTTTACCGGTACTGGGAAGCGAACCATTACTTGCCATTGTCTTCAGAATGGAGACAACACCTG
GGACGACAACATTTTGGTCACGGTATTTGTATGTTATATCTGTCGCTGACGCATAGTTCAGTTTAAAGAC
CTTAACAACATCTTTATTTTTGGCTTTAGACTGTGCCTCTTTATCAAGACTTTCTGATAAAGATGTAATA
TATTTTATACATTCAGGAACACCCCGAACTTCAATCGAGTTAAATGTCGTAATTTTTCTCACATTGCAAG
AGTTTTTGTTTACTGAGATTGTATCACTCAGATATTTTAGCAGTGAGTCAATATCCAGATATGTTGGTGT
AATTATACTTCTTGATATTTCATTTGTTTTATAAATATACAAGATGTTCTCATCATAATACCATGTGAGA
TGATAGAGTTTGGACAGTTTTTCCAGTACTTTTACAGGTTTTTCATTTTTTATTTCGCCAGAGAAATCAT
CATTCACGGAACTACTGATGAAAACAGGAATGCTGTAGTTAGCAGCAAAGTCATTAAGGATTGCACGTAC
TGGAGAACTTTTAGTAATAATAAAATATTCGTTCTTGCCTAATCTTTTTTCCAGAGAGGACGGGGCAGCT
TGTGCACTGCAGCAAAATAGTGCTGTAAAAATAAAAAAACTTATTTTTTTCATTACACAATTCGTCCTAT
ATCAGAAAACAAGTGTGTTGGCGGCATCATTGTATCTGATGAAGATGATTGCTCTAGTTTATCAAATTGC
TTGTCGAGCAACGAGGCGAGAGTATGTTGCATTATTGCTTTTGACATGTTTGCGCGATGATTATTATCTT
TATGAAAAATTTGGCAAAGATACCACTTCTTATTAGACAGGAAAATACCCATTTGTTTATATTCTTTACT
AACGGCCAGGATATTGCAGAGTCTGATAAATGTATCTGTTGGAATCTGACGAAAATCACCACTAAGCTCG
ATATATAGAACCCAGTAGTTTCCAAAATCGTGCAAGAAAGCATTTTTTTGGTAGATATAAAAAGTGAGAT
GCGTTGGTGAACCGTTGACATCCTTTACAAAATCAAGGGCCGTTAGCCAGTCACAATCATTCTTTGCTAT
GCCATTATTATTGTTCATACATATTACCCGTCCTGTCCTGAGGATGACTTGATAACAACACTAATATTTT
CTAATTTGAGATCGTCGACACTATTCTTAACCAGGTTTTTTATCTGAATGACCGATGGTGCTAAGTTAAC
CTCTGGCGAGCTGATGACTAAAACGGCTGCTGAGGATGGTTGACTTTCGTTATTGTTAACATTTAATGAA
ACGCTGCAATCGATAACACCGGGTATTTTACTTAGCAACCTTTCGATGTCTTGTTCTTTGAGATAGTTGA
TTTTTGCATTTTCTTGTGATGGCGATGCCACTAACTGGCTGGGTGGGAAAATAACCTCGATATCTGCAAA
TTTCTTTTTCGGGAAGCCGTTATTATTTAAAATCGTTATTGCGCGAACAAAATCCTCTTTTTCCACACTG
AGTGTCATATTTCCACTTTTGTCCATTTCTTTGGAAACATTGACATCATTGGATAGCAACAGTGCTTGCA
TCTGATTAGCTTCTTTTTCTGTTAATCCTGTATACAATTGCTCTTTACATGCCACTGTCAAACAAATAGC
AGCCAATAAAAAAAGGTTTTTAATGTGTTTTTTCATTTTTATTGCATCGAAACTAATTTTGTAACCGATG
TTGAAAGGAGGCTTGCTAACTTAGATACGACATCAACATTGACGTTTGCGTTGAGCACATTCTTTTGTAA
AGTGAGTACATCTTCGGGCGAGAGCCCACCTGCAGATAGTGCATCGAAACTGAGATCGGTGTTCATTGTT
GCAAGATGTCGCTTTTTAATTTCCTCAATCAACACTTGTTCTGGGGAAGACACTCCCGCCGTTTTAGGGA
GTAATTGATCAAGAAACTGAGCCGCTCCGGCTGCAGAGGGGGTTGATGCTAACGGGATATGCTCATCAAC
GACATTTGTTTGGGATGCTTTATTTAACTGAATATTAATGTTTTCCGATTGATTAATATTATTCATATTT
ACTGTTAGTCTCTTTTCATGAGAGAGGCAATAGCATAATGCATCCATTACCTCTCTATTTTTATGCGATG
CGATGATTAGGCATATTTCATCGCTAATCCGCCGGCAACAGTAGTTACGCCACCTAATACACCGGCTGCG
ATTCCTAAGCCTAATCTTTGTGAAGGGTCGTCAACACACATTGCTGCGATACCAGTACCGATAGCGGCTA
GAACACCTGCACCTATTAAAACTCCACCCAGGATTCTAACGCTGCGACTTGTTCCACCTTCTGACTGCAT
CACCCCTGTCTTCTCATCCACTGGATTATTTCCATTGATTGTGGCTGCCAGTGGTAATACTGCACCAGAA
GGGCTTAAATTTGCTGCTTCCATTGATCTTTCTCCTTTTGTCTAATTTAGACATTTACCTGGTTATAAAT
AACCAAATTATCCCATAGGCAACTATTATATTATTTAAATAGTTGCAATGTACATAAAGTACATATACTG
TATATATTATCCAATACGCTTTTTCAAGCAATAATATTCACACGTATACTTACTTCAGAGCCTGCAGATG
AATCTTTTAGTTAAAAGAAATGTTGAAGAGTTTTTAAGATTGTTGGGAAATGATTTTTATTTATTTGATA
ACCGTGTTGAAATTGATTTTAATGGGTTTTCTTTTTTTATTGAAATAATTGATAATAATGTTTTTGTTAC
GTTTGCTTTAGAGTATAACGAAAACGCATTTTTCTCTTTCTTTAGTGCCCTTGCTCCTGAGCGTACGCAG
GGAGTGATTGAACATATTTTTGTCTACGATAATAAATTGTGCTTAAGTTGTTTGTTAACCAATATCGATG
TTTTTTTTCTAATGAATACTTTTCAACAGCATGTGCAGATTATTGAGCGCGTTCGCAGGATGACATCATG
AATAAACTCTTAAATATATTTAAAAAAGCAGAGTCATATCACGATCTTATTCTGGCTCTCTTCTTCTTTA
TGGCTGTAATGATGATGATTATTCCACTACCAACAGTTGTGGTGGATATCATTATCGCGATTAATATTTC
GACAGCTTTACTTTTATTAATGCTCTCAATCTATATAAAAAATCCTCTTGAACTAACTTCTTTCCCCACA
ATCCTGTTGATTACGACGTTGATGCGCCTGTCGCTCAGTGTTAGTACAACCAGACTTATTCTGCTGCATC
ACGATGCGGGTGACATTATTTACTCCTTCGGTAACTTTGTTGTTGGCGGTAATATTGTTGTTGGCCTGGT
TATTTTTACTATTATCACCATTGTTCAATTTATGGTTATTACAAAAGGGGCCGAGCGTGTTGCTGAAGTG
AGTGCTCGTTTTTCCCTTGATGGTATGCCAGGAAAGCAAATGAGTATTGATGGTGATATGCGCGCAGGCG
TTATTGACCCGCTTGAGGCAAAAGTTCTTCGCTCCCGAGTGCAAAAGGAAAGCCAGTTTTATGGTTCAAT
GGACGGGGCGATGAAGTTTGTAAAAGGGGACGCTATTGCTGGTATCATTATTGTTTTAGTTAACCTTTTT
GGTGGCGTGCTCATTGGTATGTGGCAATTTGACATGCCATTTAGTGAGGCACTTAGCCTGTTTTCTGTAT
TGTCTGTCGGTGATGCTTTGGTTGCCCAGATCCCTGCGCTTATTATTTCTGTCACCGCGGGCGTGGTTGT
TACTCGTGTGCCCGGTGAAAGCGAAAAAGAAGAAAACCTTGCAGGTGATATTGTTCAACAGGTTTCTGTT
AATAGTCGCCCTTTTTTAATCAGTGCCGCACTAATGCTCGTAATGGCGATTATTCCGGGCTTTCCTACAT
TGGTCTTCTTATTTCTGGCGGTTTGCCTGTTGGGGATAGCCTGGAAATTACAGAAGAAAAGAACATTTGG
AGCTGGCAATAATAAGGATGCTATGGGAGCTGATTTGTCTAATAGCCAAAACATCTCACCGGGCGCTGAG
CCATTGATTTTAAACTTAAGTAGTAATATTTATAGTTCAGACATTACACAGCAAATTGAGGTCATGCGTT
GGAATTTCTTTGAGGAAAGTGGAATTCCATTGCCTAAGATTATTGTTAATCCGGTTAAAAATAATGATAG
CGCAATAGAATTTTTGCTCTATCAAGAGTCAATATACAAAGATACTCTTATAGATGATACTGTCTATTTT
GAGGCTGGGCATGCAGAGATATCATTCGAATTTGTCCAGGAAAAGCTTTCGACTAACTCTATCGTATATA
AGACGAATAAGACTAATCAACAACTCGCTCACCTTACAGGTATGGATGTTTATGCAACAACAAATGATAA
GATAACGTTTTTGCTAAAGAAACTTGTATTGTCTAATGCCAAAGAGTTCATCGGCGTACAAGAAACGCGT
TATTTGATGGACATCATGGAGAGAAAATATAACGAGCTTGTGAAAGAGCTGCAGCGCCAGCTTGGTTTGA
GCAAAATTGTTGACATTCTACAACGTCTCGTAGAGGAAAATGTCTCAATTAGAGATCTGAGAACTATCTT
TGAGACGCTTATTTTTTGGTCAACAAAAGAAAAGGATGTGGTTATCTTGTGCGAATACGTTCGTATCGCC
CTGCGTCGGCATATTTTAGGTCGCTATAGCGTTAGCGGTACACTTCTGAACGTTTGGCTTATTGGCTCTG
ATATTGAAAATGAGCTACGAGAGTCGATCAGACAAACGTCATCAGGTTCGTATCTGAATATCTCACCGGA
GCGAACTGAGCAGATAATTGGCTTCTTAAAAAATATCATGAATCCAACGGGGAACGGCGTCATTCTGACC
GCTTTAGATATCAGGCGCTATGTGAAGAAAATGATTGAAGGTTCGTTCCCGTCAGTCCCCGTGCTCTCTT
TTCAGGAGGTTGGGAATAATATCGAACTTAAAGTATTAGGAACGGTAAATGATTTCAGAGCATGATTCTG
TATTGGAAAAATACCCACGTATTCAGAAAGTGCTCAATAGCACTGTGCCGGCATTATCATTAAATTCGTC
TACCAGATATGAAGGCAAGATTATCAATATCGGCGGGACGATTATTAAGGCGCGTTTACCAAAAGCGCGT
ATTGGCGCCTTTTACAAGATAGAACCCAGTCAACGTTTAGCCGAGGTGATCGCTATTGATGAAGATGAGG
TTTTCTTGTTGCCTTTTGAGCATGTTTCCGGCATGTACTGTGGTCAGTGGTTAAGTTATCAGGGGGATGA
GTTCAAGATTCGTGTTGGAGACGCACTACTTGGGCGGCTTATTGATGGCATAGGCAGACCAATGGAGAGT
AATATTGTTGCCCCCTATCTTCCGTTTGAACGCAGCTTGTATGCTGAACCACCAGATCCTTTATTAAGGC
AGGTTATTGATCAGCCATTTATACTTGGCGTCAGGGCAATTGATGGGCTACTAACTTGCGGTATTGGGCA
GCGTATCGGTATTTTTGCTGGTTCAGGCGTTGGTAAAAGTACGCTTTTGGGGATGATTTGTAATGGCGCA
TCCGCAGATATTATTGTCCTTGCTCTTATCGGCGAACGTGGTCGCGAAGTAAATGAATTCCTCGCGCTTT
TACCTCAATCCACGCTTTCTAAATGTGTGCTGGTCGTCACAACGTCAGACCGCCCCGCGCTGGAAAGGAT
GAAAGCCGCATTTACGGCGACGACTATTGCAGAGTACTTCCGCGATCAAGGTAAAAATGTATTATTAATG
ATGGATTCTGTAACTCGTTATGCCCGAGCCGCGCGTGATGTTGGGCTTGCATCGGGAGAGCCTGATGTAA
GGGGGGGATTCCCTCCGAGTGTTTTTTCTTCGTTACCCAAATTATTAGAGCGAGCGGGGCCTGCGCCAAA
AGGTTCAATAACCGCGATTTATACGGTGTTGTTAGAAAGCGATAATGTTAATGATCCTATTGGCGATGAA
GTCCGCTCTATTCTTGATGGGCACATCGTACTTACCCGAGAACTTGCAGAGGAAAACCATTTCCCTGCAA
TTGATATTGGTTTAAGTGCCAGTCGTGTTATGCATAACGTTGTTACATCGGAGCATTTGCGTGCGGCGGC
AGAATGCAAAAAGCTTATTGCAACTTATAAAAATGTTGAGCTGCTTATTCGTATTGGTGAGTACACGATG
GGGCAAGATCCTGAAGCAGATAAGGCAATAAAAAATAGGAAATTAATTCAGAACTTTATACAACAAAGCA
CCAAAGATATCAGTAGTTACGAAAAAACGATTGAAAGCCTATTCAAAGTGGTTGCCTGAGTATGTTGGAC
AGAATTTTATCTATTCGTAAAAGCAGAGCGAACCGATTGAGAGAATCAATGGCTAAGATTAACTCTCAGA
TAAAAGAGGTGGATGGTAAACTCGATGACTGCGAGCAATCCATTAAAGAGTCGATTGCCTCTAAGCAGGC
GTATTGTGCATCGCTGGTGAATTTGGATAAAGTGTCGTTGTATAAATATCAGATTAAAAACAATGCATTT
GATGAGCAAAAGCAGCGATTGTATGAGAAAAAATCTTCACTTTCGAAGGAAAAGCGTTCATTGCTAGATT
CACAAAAACGAACAAAAGAGAATCTGCAACATGTTAATAAATCAGTAGAAAAATTATCTTTTGCCATAAA
GGAACATTACTTTGACTAGAGTTTCTCTAAAAAGAAATTTGATAGAGCCTGTTTCTTTTCGGCCATCAGA
TGATTGGCCGCAAGGAGAAGAAAGTTTTAATGATATTTTTTATCATATAAAAAAAAGATCGCCTGATACG
TTGTTCATACGAATGGCTTCTTTATGGAAGAGATTGTTTTACTCCTCGGGCCGAAGACGACGCTACTTTG
AAGAAGGGGAGCACTCGTTTAGTATTCTTTGTGGAAGATTACGAGGAGTTGTTTTAACAATTAAATGTAG
TAACGGAATCATTTATCTGTCTATTAAAATAAGCCAAAATAATAGAAATCATGTTTTTTTATATCATAAA
AAAGACTATGTTTTCGATAAGTTAAAAGAAATCTTTCCTGATGAAGCCATTGAGTTCACAATTGAATATG
AAAATTAACGATTTTTATTTGCCGTTGTTGCCAGTTATCGGAACCGGTCGCCTCTATATTACGTCCGAAG
GTCATGCTTGCCATGCATATTTTCGTGAGGTCAGCGGTCATGGTATTCGTTTCACGTTGACATACTCGGG
CTATGAGGGGCGTTTCTGGATATCAGAAGAACAGTTCATTCAGTGGTGCCAAGAGTTATTCCCGTATAGT
GAAAGCCGGCTGATACCGGAAGATATGATAAAACTCATGATCTTATGGGTAATGCAGACTGCCTTACCGG
AAGGTGATGTGTCAGTTGATGATGTTCAATTTACGATGCTAAATAAAGATGTTTATCCGGTAATAGAAAA
TAATAATGGAGAAAACAGACTTAATGTAATTATACTCGAAACAACGGTACAAAGTTTACAACATCTGATT
AATGATAATTGGCAATTTGTTCCACATTCTAATGCTCTTTTTTTTGATGGCTATATCGTACCTGGGTGGA
CTGATTATCCAGTTACAGAGTTGAGAGTTGGTGATAGTCTGAGACTCTATCATGTTGATGATAGTCAAGA
GAGAAGGTGCTGGATTGTTATTAATAACCCTTTGGCAACCGTAAAGCTGAGCGATAATAATTTATCTGTC
ACGGATGTTCTGGCTGCAGATCCGTTATGTACTATCAGCAGCGAGACTGTGATGAATCGCATTTATTGTG
TGATTGGCACAGTGCATATTGATATACATATGTTGCGTAATGTCCAAAAAGATGACATTATCGATTCAAC
GGGATATCATCTTTTTGGTGGGTGCCAGTTAGTACGGAATAATACCACAATCGCATACGGGAGTATTATA
AAAATCAACGAAGATTTTTATTTTACTATTAGCGTAGTATGTGATTAATCAGGAATGCGTTATATAGGGA
GGTGTATGATGTCGTCATCATTATCAGGTATAACATTCACTACTTCTTTGACAAGCCATGCGTCATGGAA
TAAGTTGACCCGAACTCTTCATATATCGAATGATGATATAGTAGATGAACTGCAACTTAAAGCACGCATG
CAGCAGCGTCACCACCGGGTTTTTGCAGGCATTGATGACTATTCAATTATCAATTTTCGTGGAAAAGATT
ATGCTGTCCGCTTCATTAAAGATAAAGATAATTATGTGTACAAAGTAAATAAGATAACTCAGGAAAGTGG
ATGTTTCTCAAGGATATTTAGCTTTTTGTATGGAGGCGTTACGAAGGCCCTGGAAAGTAAATTAAATGAG
AGACACATTACGCCACTGTCTTCAACCTGGTTTCCTCGCACTGCACTGGAAGGCTTTTTAACTGAAAGAG
GGCTCTCTTCTTTGTTACGTCGCGTACAGTCTACAGAAGGTGTGAACCCTCCAGAGAATACTACATTAAA
CTCTTTATCAGGTGTGACAGTTTAAGTATTATTTTATGCTGTTTTCTTTTTCTCCCCAGAATGTGTTCTG
TTCTGGGGACGATATTTCATTATTTTTTTGAAAAGAATATGCAGGCGAAATGATTAGTATTTCAAGGATA
GAGCACTGTAGTTTTTGTGAAATATGGACTGAATGGATGCCACCATCCAGTCCATATTATCACTTCCAAA
GTAAAAAGCAAATAAATCAAAGTGAAAGTAGTTTTATTATTTCTTTTTTTAGTAGATATCCGTTTTCCAT
CAAGTTAGTGAATTCCGTTATATCTATTTTATTTTTGGGGAATGCAATGTTTAAGAAAGTTTTATCGTCT
TTTAATGATAAGAAAAACATACCAAGCATTTCTCGGTTGTTGTTTATTTCTAATATTTTATTGATTTGAT
CTGGTTCGTTGGTTGATAGGTAACAATAAAAAAACAAAATTTCTGATTGAGGTGCGCACTCAAGTATCCA
CTCATGACCATCGTTATCGTGAAAAGCGAGGGCGTCAGTTTGCTCTTCCAATGTTATCCCAAACGTATGT
GCAAGATCTTTGCAAAATTGTTCATTCATATTGTAGTCCTGTCATTCTTATAACGCTGATGTGTTCATAG
GTAATTTATTTGTGAGTTCTTACACAAATAACAAGGAAAAAATATAACATGTAAGTAATAATGTTGCATA
TTCATGATAGCATATGATAAATGTAGTGCAACCACCTATAAATAGTGCTGGAGGAAAAGTTCTGGAGGAA
AATTAAAATCATAAAATAATATTATAGTTTTATTTATTCGTTTTATTTTTATAGGTGTAAATGTTTTTTA
TGTAATTTATAAAGGTTTATAGCATGTTTAGTCCAACGGCAATGGTAGGTAGAGCGTTAGCTCAGGCGGT
TACACAAACTCTTAGACCCGCTGTAACCAAGGCTGCGACGCAAGCGGGCATGGCAGCCAGTGGTATGAGG
TTCACACCTATGCAGTCGAACCTTATGATTAATCATGGCAAACTGACTACCCAGCTACTACAGGCCGTAG
CCAAACAAACTGGTAGTAGTGATACCCAGCAATGGTTCAAGCAAGAGCAGATTACTTTTCTATCCAGAGC
AGTAAACAAAACTGTGGATGACTATTGCATGAGTAATAATTCGGCAATTAGTAAGGAGACTAAATGTCGC
ATTTTTAAAGAGGTTGAAAGCGCGATACAACAGCCTCTCGATATGAACTGTGCACAATCATCAATTAGTC
ACTTTTTGCAATCCAATAAATACTTTAATCAGAAAGTTGATGAGCAGTGTGGTAAAGGAGTGGATCCCAT
TACACGTTTTAACACTCAAACCAAATTGATAGAACAAGTCTCACGCGAAATCTTTGAACAGAATTTTAGC
ACCGCGAAAATCAGTGATATCAAGGCTCTAACTGAGAAGGCGATTGCAGACAATGTGCAGGATACTCGGC
TGTAGGGGGAAACTTACTGCGCTGTTATTTTTTTTCTTGATGCAAAAAGGTCTCTATAGACGTTTAAAAT
AAAATATTATTTTTCAATACACAATTAAATTTCTGCATATAAAAATTATAATTATTTTTTTTCGATAATT
ATATAATGATTTTGATTATGTGATTTTTTAGTTGGAAATACAGACATGCATTTCTGGTGCGTTATTTTGC
TTGCATCAAAAATTATACTGTGATTTATTTGGTTTATGCTCAGTTGTTTTATCGGCTGCATACCGTTACG
TCATAGTAATATAAAGGAACGTGTCAAATTTCTAAATAAAAGGATATATGTATGCCTATTGGTAACCTTG
GTAATAATGTAAATGGCAATCATTTAATTCCCCCTGCGCCGCCACTACCTTCACAAACAGACGGCGCGGC
ACGGGGAGGAACTGGTCATCTAATTAGCTCTACAGGAGCATTAGGATCTCGTTCATTGTTTTCTCCCCTG
AGAAATTCTATGGCTGATTCTGTCGATTCCAGAGATATTCCAGGACTTCCTACAAACCCATCGAGGCTTG
CTGCAGCTACATCTGAGACATGCTTGCTTGGAGGATTTGAAGTTCTCCATGATAAGGGGCCACTTGATAT
TCTCAATACGCAAATTGGACCCTCTGCATTTCGTGTTGAAGTGCAGGCAGATGGTACTCATGCCGCTATT
GGAGAAAAAAATGGTTTGGAGGTTAGCGTTACATTAAGTCCTCAAGAATGGAGCAGCTTGCAATCTATTG
ATACTGAGGGTAAAAACAGATTTGTTTTTACCGGGGGACGTGGCGGTAGTGGGCATCCGATGGTCACTGT
CGCATCAGATATCGCGGAAGCTCGTACGAAAATACTGGCCAAATTAGACCCAGACAATCATGGAGGACGT
CAACCCAAGGACGTTGATACGCGTTCTGTTGGTGTTGGCAGCGCTTCGGGAATAGATGATGGCGTTGTTA
GCGAAACCCATACTTCAACAACAAATTCCAGCGTTCGCTCAGATCCTAAATTCTGGGTTTCTGTCGGCGC
AATTGCTGCTGGTTTAGCGGGACTGGCGGCAACTGGTATTGCACAGGCGTTGGCTTTGACACCGGAACCG
GATGATCCTACAACCACCGATCCTGATCAGGCCGCAAATGCTGCAGAAAGTGCAACAAAAGATCAGTTAA
CGCAAGAAGCATTCAAGAACCCTGAGAACCAGAAAGTTAACATCGATGCGAACGGAAATGCTATTCCGTC
TGGGGAATTAAAAGATGATATTGTTGAGCAAATAGCACAACAAGCTAAAGAGGCTGGTGAGGTGGCCAGA
CAGCAGGCTGTTGAAAGCAATGCACAGGCGCAGCAGCGATATGAGGATCAGCATGCCAGACGTCAGGAGG
AATTACAGCTTTCATCGGGTATTGGTTACGGCCTCAGCAGTGCATTGATTGTTGCTGGGGGAATTGGTGC
TGGTGTAACGACTGCGCTCCATAGACGAAATCAGCCGGCAGAACAGACAACTACTACAACAACACATACG
GTAGTGCAGCAACAGACCGGAGGGAATACCCCAGCACAAGGTGGCACTGATGCCACAAGAGCAGAAGACG
CTTCTCTGAATAGACGTGATTCGCAGGGGAGTGTTGCATCGACACACTGGTCAGATTCCTCTAGCGAAGT
GGTTAATCCATATGCTGAAGTTGGGGGGGCTCGGAATAGTCTATCGGCTCATCAGCCAGAAGAGCATATT
TATGATGAGGTCGCTGCAGATCCTGGTTATAGCGTTATTCAGAATTTTTCAGGGAGCGGCCCAGTTACCG
GAAGGTTAATAGGAACTCCAGGGCAAGGTATCCAAAGTACTTATGCGCTTCTGGCAAACAGCGGCGGATT
GCGTTTAGGTATGGGAGGATTAACGAGTGGTGGCGAGAGCGCAGTAAGTTCTGTAAATGCCGCACCAACG
CCGGGACCAGTACGTTTCGTTTAAATATATCTGTGAGTATTTAGTTGAGGTTGGGGTGGGGTGGGGGGGC
GTTTTACTAGCGTTAATGTTTCAGAGAACAACGTTGCAGCATGGGTAACTCTTGAACTTCTGTTATTATA
AATCAATTAAGAGAAATTATAATGTCATCAAGATCTGAACTTTTATTAGATAGGTTTGCGGAAAAAATTG
GTGTTGGATCTATTTCCTTTAATGAAAATAGATTGTGTTCTTTTGCTATTGATGAAATTTATTATATTTC
GTTATCTGATGCCAATGACGAATATATGATGATTTATGGCGTCTGTGGAAAATTCCCGACAGATAACCCT
AACTTCGCTCTTGAGATTTTGAATGCAAACTTATGGTTTGCAGAGAATGGTGGGCCATACCTGTGTTATG
AGTCAGGAGCACAATCGCTGTTGTTAGCGTTACGTTTCCCGCTCGATGATGCTACCCCTGAAAAACTTGA
GAATGAAATAGAAGTCGTCGTTAAGTCGATGGAAAATCTGTATTTGGTATTACATAATCAGGGAATAACA
TTAGAAAACGAACATATGAAAATAGAGGAAATTAGCTCAAGCGATAATAAACATTATTACGCCGGAAGAT
AAAACTTATTTATTAGTATTAATTTACTACTCATTCTAACTCATTGTGGTGGAGCCCAAACATGATTACT
CATGGTTTTTATGCCCGGACCCGGCACAAGCATAAGCTAAAAAAAACATTTATTATGCTTAGTGCTGGTT
TAGGATTGTTTTTTTATGTTAATCAGAATTCATTTGCAAATGGTGAAAATTATTTTAAATTGGGTTCGGA
TTCAAAACTGTTAACTCATAATAGCTATCAGAATCGCCTTTTTTATACGTTGAAAACAGGTGAAACTGTT
GCCGATCTTTCTAAATCGCAAGATATTAATTTATCGACGATTTGGTCGTTGAATAAGCATTTATACAGTT
CTGAAAGCGAAATGATGAAGGCCGCGCCTGGTCAGCAGATCATTTTGCCACTCAAAAAACTTCCCTTTGA
ATACAGTGCCTTACCACTTTTAGGTTCGGCACCTCTTGTTGCTGCAGGTGGTGTCGCTGGTCATACAAAT
AAACTGACTAAAATGTCCCCGGACGTGACCAAAAGCAACATGACCGATGACAAGGCATTAAATTATGCGG
CACAACAGGCGGCGAGTCTCGGTAGCCAGCTTCAGTCGCGATCTCTGAACGGCGATTACGCGAAAGATAC
CGCTCTTGGTATCGCTGGTAACCAGGCTTCGTCACAGTTGCAGGCCTGGTTACAACATTATGGAACGGCA
GAGGTTAATCTGCAGAGTGGTAATAACTTTGACGGTAGTTCACTGGACTTCTTATTACCGTTCTATGATT
CCGAAAAAATGCTGGCATTTGGTCAGGTCGGAGCGCGTTACATTGACTCCCGCTTTACGGCAAATTTAGG
TGCGGGTCAGCGTTTTTTCCTTCCTGAAAATATGTTGGGCTATAACGTCTTCATTGATCAGGATTTTTCT
GGTGATAATACCCGTTTAGGTATTGGTGGCGAATACTGGCGAGACTATTTCAAAAGTAGTGTTAACGGCT
ATTTCCGCATGAGCGGCTGGCATGAGTCATACAATAAGAAAGACTATGATGAGCGCCCAGCAAATGGCTT
CGATATCCGTTTTAATGGCTATCTGCCATCATACCCGGCATTAGGTGCCAAGCTGATGTATGAGCAGTAT
TATGGTGATAATGTTGCTTTGTTTAATTCTGATAAGCTGCAGTCGAATCCTGGTGCGGCGACCGTTGGTG
TAAACTATACTCCGATTCCTCTGGTGACGATGGGGATCGATTACCGTCATGGTACGGGTAATGAAAATGA
TCTCCTTTACTCAATGCAGTTCCGTTATCAGTTTGATAAACCGTGGTCTCAGCAAATTGAGCCACAATAT
GTTAACGAGTTAAGAACATTATCAGGCAGCCGTTACGATCTGGTTCAGCGTAATAACAATATTATTCTGG
AGTACAAAAAGCAGGATATTCTTTCTCTGAATATTCCGCATGATATTAATGGTACTGAACGCAGTACGCA
GAAGATTCAATTGATCGTTAAGAGCAAATACGGTCTGGATCGTATCGTCTGGGATGATAGTGCATTACGT
AGCCAGGGCGGCCAGATTCAGCATAGCGGAAGCCAAAGCGCACAAGATTACCAGGCTATTTTGCCTGCTT
ATGTGCAAGGTGGTAGCAATGTTTATAAAGTGACGGCTCGCGCCTATGACCGTAATGGCAATAGCTCTAA
CAATGTACTGCTTACTATTACCGTTCTGTCGAATGGTCAGGTGGTCGACCAGGTTGGGGTAACGGACTTT
ACGGCTGATAAGACTTCGGCTAAAGCGGATGGCACCGAAGCAATTACTTATACTGCGACGGTGAAAAAGA
ATGGGGTAGCTCAGGCTAATGTCCCTGTTTCATTTAATATTGTTTCAGGAACTGCAGTTTTAAGTGCCAA
TAGTGCCAATACCAATGGTAGCGGTAAGGCGACTGTAACCCTGAAATCGGATAAACCAGGCCAGGTCGTC
GTGTCTGCTAAAACAGCAGAGATGACTTCAGCGCTTAATGCCAATGCAGTTATATTTGTTGATCAAACCA
AGGCCAGCATTACTGAGATTAAGGCTGATAAAACAACGGCAGTAGCAAATGGTCAGGATGCTATTACATA
CACTGTTAAAGTGATGAAGGGGGATAAGCCTGTATCTAATCAGGAAGTGACCTTTACGACGACCTTAGGT
AAGTTAAGTAATTCCACTGAAAAAACGGATACGAATGGCTATGCCAAAGTAACATTAACATCGACAACTC
CAGGAAAATCACTCGTTAGTGCCCGTGTTAGCGATGTCGCCGTTGATGTCAAAGCACCTGAAGTTGAATT
TTTTACAACGCTTACAATTGATGACGGTAATATTGAAATTGTTGGAACCGGAGTTAAAGGGAAGTTACCC
ACTGTATGGTTGCAATATGGTCAAGTTAATCTGAAAGCCAGCGGAGGTAACGGAAAATATACATGGCGCT
CAGCAAATCCAGCAATTGCTTCGGTGGATGCTTCTTCTGGTCAGGTCACCTTAAAAGAGAAGGGAACTAC
AACTATTTCCGTTATCTCAAGTGATAATCAAACTGCAACTTATACTATTGCAACACCTAATAGTCTGATT
GTTCCTAATATGAGCAAGCGTGTGACCTATAATGATGCTGTGAATACATGTAAGAATTTTGGAGGAAAGT
TGCCGTCTTCTCAGAATGAACTGGAAAATGTCTTTAAAGCATGGGGGGCTGCAAATAAATATGAATATTA
TAAGTCTAGTCAGACTATAATTTCATGGGTACAACAAACAGCTCAAGATGCGAAGAGTGGTGTTGCAAGT
ACATACGATTTAGTTAAACAAAACCCTCTGAATAATATTAAGGCTAGTGAATCTAATGCTTATGCCACTT
GTGTAAAATAAATTTAATAAATATCTAATCATTGTCCGGCTAAAATGTATCTTTTAGTCGGACATTTTTA
TGCGATATATTCTATATTAGCACCTTTCGAGTTGTATCCTGGTAATCAAGTCTCTAGCTAGCTTTTCTCT
CCACCCAATAATTTGACATCATGAAGACTATATCTATAACATCCACACAATAAAAAACCCTCCGAAGAGG
GGGAAGAGGATAAGAAATTAATACGACAGTGGAATATGTATATATTCGTCTGGGCGGGAGATGTTGATAC
CATCTTTAGGATCAATTGCGTCGATGACATAGCCTCCTTTCAGAATGCTACCAATCCCGAGGCTGGTACC
ATTATCAAGAGCAATTGTAGGATTCTTCATCGTACCGCTGATTCTGAGTATTTTTCCGGGAAAAATATCT
GCTGAAATGTACGGCTGAATGTTCTGAAAGAGTATCTTGACGTTACTATTTTTGTTCATTGCATTTATAA
TGGCAAGGATCTTACTCTCGTTCTGTTGAGAAACTTCCCCCGCGACAATGATGACATCATTCTTTTTGAA
AATATTGACATAGTTTATTAGTTTATTCTTTTTAAACTCTGATGCCAGTTCATTGATTTTATTGTTACTG
TTGTTGTGTATTTCCCATCCTGCAACCCCTGGCGTATTCAGTAACAGATTTTCAACCTCGCTCCATTTGG
GTGAAGGGGGAATGTATCCCGATAACAGAAAGAACCCAGGCTTATTACCTTTTGTAATAATGATATCTTT
GTAACCGTATTCCGTTAAGACATCATTAATTGCGGATATGATTTGGTTATTGCAAATGATTTTATTGTAA
TAAAAAATATTTTTTTCTTTCAGGTAATTAAAAAATGGAGTTAAATCCGTGGTTGATTCGCAACGCCCAT
AAAGCGCGATATTTTTTCCATGCCATACCAGAGTGATTGCATGAAGTTTGTTTTCTTTTAGCTGCTGATA
TACATCAGCTCTGGTAAACGTTGGGGGTTCAGCTTTTGGGGAAAGCAAAACGTAACTGCCGATGGCACCA
GACAACGCAAAAGTAGCACCAATCACGCTCGCCAGGATAAGGCGTTTTTTGCGTTGATTTTTGGCAGAAA
ACCTTTCTGGCACATCAGACAATGGCAAGGAATGGTCAATATCACCAATGATGAAGCAACATCCCGCTAT
ATCAATAATCTTTCCGACAGGTAATGGTTTATCTGCTTCATAGGGCGTGGGTTGCCCATCAATCCAAAAT
TCAACCGGAGATAAAAGGAAAACACCTTCCTCACGTATATCAAGTAAAAACTGATTGAGGCCTTGTTCAA
GAGGAAAGTAAACAATATCGTTATCTTCCGTACCTAGCGTTAGGTTTCCCATCGGAAGTTGTAATTCCCG
ATTACGCATCGCACCATTGAGAAGTTTTATTTTATATGAGGATAACATTTTTAAATTTTATTCATCCTGG
TGGTTGAACAATGAGAAAAAATATGGTGAACTTACATCGTCTAAGAATAGAGTAGAAAGGAAGCTGTTGT
ACAGTACTATTTAATGGAATATTCATAATTAATGATTACGTGAGTTTCCAATGGCTAATGGTATTGAATT
TAATCAAAACCCCGCATCTGTTTTTAATTCTAATTCATTAGATTTTGAATTAGAATCTCAGCAATTAACG
CAAAAAAATTCTTCTAATACTTCTTCGCCATTAATAAATTTGCAAAATGAATTAGCAATGATTACTAGCT
CATCGCTTTCTGAAACGATTGAAGGGCTAAGCCTGGGATATCGCAAAGGTAGCGCAAGGAAAGAAGAGGA
AGGCACGACAATCGAGAAGCTGCTCAATGAAATGCAAGAGCTGCTTACTCTTACCGATAGTGATAAAATA
AAAGAACTATCATTAAAAAACAGCGGGTTGCTGGAACAACACGATCCTACTTTGGCGATGTTTGGCAACA
TGCCAAAGGGGGAAATTGTTGCGCTAATATCTTCTTTATTACAATCTAAATTCGTTAAGATTGAATTAAA
AAAGAAATACGCCAAATTATTATTGGATTTATTAGGCGAAGACGATTGGGAGCTGGCTCTGCTTTCCTGG
TTAGGGGTGGGTGAGTTAAACCAGGAAGGTATCCAGAAGATCAAGAAGCTTTATGAAAAGGCTAAGGATG
AGGATTCTGAAAATGGCGCCTCTTTACTTGACTGGTTTATGGAGATTAAGGATCTTCCTGAGCGTGAAAA
GCACTTAAAGGTTATTATTAGGGCGCTATCGTTCGATCTGTCTTATATGTCTTCTTTTGAAGACAAGGTA
AGAACATCTTCAATTATTAGTGATTTATGTCGGATAATCATTTTTTTATCACTTAATAACTATACGGATA
TTATTGCAATCTCCATTAAGAAAGATAAAGATGTCATTTTAAATGAAATGCTATCTATTATTGAACATGT
ATGGTTAACAGAAGACTGGCTACTGGAGAGCCCTTCTCGGGTATCGATTGTCGAAGATAAACATGTTTAT
TATTTCCATTTATTGAAAGAATTTTTTGCATCATTACCTGATGCTTGTTTTATTGATAACGAGCAGAGGA
GTAATACATTATTAATGATTGGTAAAGTGATAGATTATAAGGAGGATGTTATGTGATATTGTTTTTTTTA
TAGTTTTTGTCATGCTAAGAAAGATTATGAAGAGGTATATACATGGATACATCAACTACAGCATCAGTTG
CTAGTGCGAATGCGAGTACTTCGACATCAATGGCCTATGATTTAGGGAGCATGTCGAAAGATGACGTTAT
TGATCTATTTAATAAACTCGGTGTTTTTCAGGCTGCAATTCTCATGTTTGCCTATATGTATCAGGCACAA
AGCGATCTGTCGATTGCAAAGTTTGCTGATATGAATGAGGCATCTAAGGAGTCAACCACTGCCCAAAAAA
TGGCTAATCTTGTAGATGCTAAAATTGCTGACGTTCAGAGTAGCTCTGACAAGAATGCGAAAGCTCAACT
TCCTGATGAAGTGATTTCATATATAAATGATCCTCGCAATGACATTACAATAAGTGGTATTGACAATATA
AATGCTCAATTAGGCGCTGGTGATTTGCAAACGGTGAAAGCAGCTATTTCAGCTAAAGCGAATAATTTGA
CAACGACGGTCAATAATAGCCAGCTTGAAATACAGCAAATGTCAAATACGTTAAACCTATTAACGAGTGC
ACGTTCTGATATGCAGTCACTGCAATATAGAACTATTTCAGGAATATCCCTTGGTAAATAACCGGAGATA
ACTATGCTTAATGTAAATAACGATATCCAGTCTGTGAGGTCTGGAGCCAGTGCTGCTACGGCTACTTCAG
GTATTAATCAGTCTGAAGTGACTTCCGCGCTGGATTTACAACTGGTTAAATCCACGGCCCCATCAGCAAG
TTGGACAGAAAGTACCGCTTTACCAACGCCACCGGCAGGTCACTCATTAGTGACGCCCTCTGCTGCTGAG
GATGTCCTGAGTAAGCTGTTTGGTGGTATTAGTGGTGAAGTTACGAGTCGAACAGAGGGAACAGAACCAC
AGCGCAGCACTCAGAATGCAAGCTCTGGCTATCCTTATCTTTCTCAGGTGAATAACGTTGACCCTCAGGC
CATGATGATGATGGCCACTCTGTTATCCCTGGATGCCTCAGCGCAGAGAGTTGCGAGTATGAAAAACTCC
AACGAGATCTACGCGGATGGACAAAATAAAGCGCTGGATAATAAAACGCTGGAGTTTAAAAAGCAGCTCG
AAGAACAACAAAAAGCCGAAGAGAAAGCACAAAAAAGTAAAATTGTTGGTCAGGTCTTTGGTTGGTTAGG
GGTTGCAGCAACTGCTATTGCAGCTATTTTTAACCCGGCACTCTGGGCTGTTGTTGCTATTAGTGCAACA
GCAATGGCACTGCAAACTGCAGTTGATGTTATGGGCGATGATGCTCCACAGGCGTTAAAAACAGCAGCGC
AAGCTTTTGGCGGTCTATCTCTTGCCGCAGGTATTCTGACAGCCGGCATTGGCGGGGTGTCTTCACTTAT
ATCTAAAGTTGGCGATGTCGCTAACAAAGTTGGTTCAAACATCGTAAAAGTAGTCACTACGCTGGCCGAC
ACTTTTGTTGATAATGTTGCATCGAAAATTTCGGCAGTGGCAAATGGTTTAACTACTTCTTCGCGCTCTA
TTGGTACAACTGTGCTGAATAATGACGCAGCGTATTATAATGTGTTATCACAGGTTTCTGCTTTTGCTGT
GGAAAATTTAACTCGACAAAGTGAGTACTTAAGTCAGAGTGCGAAGGCAGAGCTGGAAAAAGCTACTCTC
GAGCTGCAAAACCAGGCGAATTATATACAGAGTGCTTCTCAGCTGATGTCTGATTCTGCGCGAGTGAATA
TCCGTATTGTCAGCGGTCGAGTTTAATTATTAAAGAGGCGTTTATTATGAATACTATCGATAATAACAAT
GCGGCAATCGCAGTTAATTCTGTTTTGAGCAGCACGACTGACAGCACCAGTTCAACAACTACATCAACTT
CGTCAATCAGTTCATCTTTACTTACTGATGGCAGAGTGGATATTTCTAAACTTCTGCTGGAGGTTCAAAA
ACTGTTGCGTGAGATGGTCACCACATTGCAAGATTATCTTCAGAAGCAATTGGCGCAAAGCTATGACATC
CAAAAAGCCGTTTTTGAGAGCCAAAATAAAGCTATTGATGAGAAAAAAGCCGGTGCGACAGCCGCTCTGA
TTGGTGGTGCTATCTCATCTGTCCTGGGGATTTTAGGCTCTTTTGCTGCCATTAATAGCGCAACTAAAGG
CGCGAGTGATGTCGCTCAGCAAGCCGCTTCTACTTCTGCGAAGTCTATCGGTACAGTCTCTGAAGCTTCA
ACTAAAGCACTGGCGAAGGCTTCCGAAGGTATTGCAGATGCAGCAGATGATGCAGCTGGCGCAATGCAGC
AAACTATCGCGACAGCTGCAAAAGCGGCCAGTCGTACATCCGGTATCACTGATGATGTTGCTACTTCGGC
TCAGAAAGCTTCTCAGGTAGCTGAAGAGGCTGCTGATGCTGCTCAAGAATTAGCACAGAAGGCAGGATTA
TTAAGTCGCTTTACTGCTGCTGCCGGAAGGATTTCCGGTTCAACGCCATTTATTGTTGTTACCAGCCTTG
CTGAAGGTACGAAAACATTGCCAACAACGATATCTGAATCTGTCAAGTCCAATCATGATATCAATGAGCA
GCGTGCTAAATCTGTAGAAAATCTTCAGGCGTCGAATTTAGATACCTACAAACAGGATGTTCGCAGAGCG
CAGGATGATATCTCTAGCCGTCTACGTGATATGACAACGACAGCCCGTGATCTTACTGACCTTATTAATC
GCATGGGGCAAGCGGCTCGCTTAGCTGGGTAATTGATCATGGTCGATACGTTTAATGATGAAGTGTTTAA
TTACTATCTTGAACAAAAAGGGTACACAATACAGAAGGAGTTTCTTTGTGGCAGTGCCTTTTTTATCGGA
TGGCGGATTGAGACACCTTTTTTTTCATTAGCGTACAGACTGGATGAACAAGAACTGATTTTGTGCTCTT
TTGAAGCACGTAACCAAACAGGGCTTAACGGCCCTGTTTTATCACTGACTCGTTTGCTCGAAGAGTTGTA
TCACCACTTTTCGGGTATTAAGAAAATCAGTGCGATGAAATCTAAGATTGGTTCAGATTCAGAACGTCAA
AAGCGCGAAGAGTTGTTTAATTACTTCATCAGAAAGGGTGCCGTGCAGCAAGAAACAGAAGACGGAATTT
GGTTCGTAATGAACGTAAATAGTTAAAAAAAAATTATTTTATTAACTTCTGAGGGAAATTTAATGAATTT
ATCTGAAATTACTCAACAAATGGGTGAAGTAGGTAAAACGCTGAGCGATTCTGTGCCAGAGTTACTTAAT
AGCACCGATTTGGTTAATGACCCTGAAAAAATGTTAGAGTTGCAGTTTGCGGTTCAGCAATATTCTGCTT
ATGTTAACGTAGAAAGTGGAATGTTGAAAACGATAAAAGATCTGGTCTCAACCATTTCTAACCGTAGTTT
TTAATTTTTATGGTTAATGATATTTCTGCTAATAAGATACTGGTGTGGGCGGCTGTAGCTGCGGCAAACC
ATAAGCTTCCCAAATATGCGGAAGCTATCCTGAATGTATTCCCACAAATTATACCTGATAAAAAAGATAT
CGCACATTTAGAATTTATTATCTTATTTGGATTAAATAGAAAAAATGATGCGATAAAGGCTTTGGAGGGC
TGTATGGATGATGAGTCGAGTCAGTTATTGTACAGTTTGTTCCATGAGAATGTTAGTGGTTGGGTACGAG
GATTTTAATTTATTTTGATTTAAAAATCATTTTATTATTCGTTTTGATATATATGAGAGTTAGCCAAGAT
TAGATATAAAGAGGCATAAATTATGCTTAATGGAATTAGTAACGCTGCTTCTACACTAGGGCGGCAGCTT
GTAGGTATCGCAAGTCGAGTGAGCTCTGCGGGGGGAACTGGATTTTCTGTAGCCCCTCAGGCTGTTCGTC
TTACTCCGGTGAGAGTTCATTCCCCCTTTTCTCCAGGTTCGTCGAATGTTAATGCGAGGACGATTTTTAA
TGTGAGCAGCCAGGTGACTTCATTTACTCCCTCTCGTCCGGCACCGCCGCCACCGACAAGTGGACAGGCA
TCCGGGGCATCCCGACCTTTACCGCCCATTGCACAGGCATTAAAAGATCATTTAGCTGCCTATGAACTAT
CGAAAGCGTCTGAGACTGTAAACTTTAAGCCAACCCGTCCGGCACCGCCGCCACCGACAAGTGGACAGGC
ATCCGGGGCATCCCGACCTTTACCGCCCATTGCACAGGCATTAAAAGATCATTTAGCTGCCTATGAACTA
TCGAAAGCGTCTGAGACTGTAAGCTTTAAGCCAACCCGTCAGGCACCACCGCCACCGACAAGTGGACAGG
CATCCGGGCCTGGTGGACTACCGCCCCTTGCACAGGCACTAAAAGATCATTTAGCTGCCTATGAGCAATC
GAAGAAAGGGTAACCAACTAATTTAAAACGATTAATCGGTATTGATTATTTGTTTTCCAACTAATAAAAA
CCGATATCAAATTGCGTGGTAATAAATGTGATTAGTAATATCGGTTTTTATTGGAGGGGTAATAAATAAT
GTATTATTATACGGTGAAAGTGGAGAAAGAGACGTTTTGTTAAAAGCGCACAGAGCTCAAAAGTCTGTTC
GCTATTGATTGTGATAATCTGAAAGGCAGTAAACTCAGGTATACTGGCAATAGCGGACACCACCATTTGT
TCTTTTTTTACGCAGTTATCTGGTTATATTTTTCCTGAAGGCTACTAGGGAGATATTCCCCAGACGGGAG
TGGCGGCGCTGATGGTTGTAGAAAATCTCAATGTATTTCCGTATTACTTAGATGGCTTCATCCCGGTTAT
TAAAACGATAGTTTCATTCTTCAGCGTTTACTATAAGTTTTTCATTGAGGTGTTGTCGTAACGGTTACCT
TTACGCGGCATGGATGTTTTCAGACCAAACCGCTCCTGTATAGCCCGGTAATCGTGTGTGTAGTACTGCG
AACCACGATTGGAGTGGTGGATTAGCCCGACTGGTGGGCGTTGCATTTCCCGGCGTTACCATACGTTTTT
GCTGCCCACGTAGTTTCCTGTCCGCACCGATTTTGAGATTTTTCCTGATATCCTCAATGCCCCCTTGTAT
AACAAAGATGCTGTTAAAAACCATTGTTATGTATTACCTTTTTCCTATTATGGGAGGCTAATATTTCAAG
AGGAAATAATACCCCCTAAAGTATCCCCAAAAGCAACTTGATACAGGTTGAGTCGATTGATCTCTGGACA
CAAAGAAAGCCTGATATATAAGGGATTAGAAGGGGTTTTGTTAACGTCGGGAGAGTTCAGGAGAGGCATT
TTGGCGGAAGATCACAGGAGTCGAACCTGCCCGGGACCGCTGGCGGCCCCAACTGGATTTGAAGTCCAGC
CGCCTCACCGGAGACGACGATCTTCCGCGCCTCGATTGCTACATGGAGGCGGGGCGCATTATAGCTACTT
CCTTGAGTTTCTACATCCCCCAGATCAGTTTTTTCCGCCTAATACACGCAGCGTATTATCACGAAAACAT
TATAGTTCATATAAAACTCATATTTTACAATGATATATGAGCGAAATTAACGCTACCACGATCACATAAA
ACAAGAATCATAAATTAATAACCAGATATCGGAATATTCGCTCTCGCAGGGATGGTTTACAAAATGCGTT
ATCGGTCTCAGCACCCCTATAGCATCAAGGAAAAGCAGATGAAGAGTGAAGTGTTGTCCGTTAAAGAGAA
AATTGGTTATGGCATGGGAGACGCCGCCAGCCACATTATTTTCGATAACGTAATGTTATATATGATGTTC
TTTTATACCGATATTTTTGGCATTCCTGCCGGATTTGTCGGAACCATGTTTTTGGTCGCTCGTGCACTGG
ATGCGATTTCCGATCCTTGCATGGGGTTGTTGGCCGATCGAACGCGCTCTCGCTGGGGTAAATTTCGGCC
GTGGGTGCTGTTTGGCGCACTGCCATTCGGGATCGTCTGTGTACTGGCCTATAGCACGCCAGATCTCAGT
ATGAACGGAAAAATGATTTATGCAGCAATTACTTATACCCTACTTACCTTACTTTATACCATCGTCAATA
TCCCTTACTGCGCATTGGGTGGTGTAATCACCAATGACCCGACTCAGCGTATCTCGCTGCAATCCTGGCG
TTTTGTGCTGGCGACCGCGGGAGGCATGCTCTCTACTGTTCTGATGATGCCACTGGTTAATTTAATTGGT
GGTGATAATAAACCACTCGGTTTCCAGGGCGGTATCGCGGTCCTTTCCGTGGTGGCATTTATGATGCTGG
CATTCTGTTTCTTCACCACTAAAGAACGCGTTGAAGCACCACCTACAACGACGTCTATGCGGGATGATTT
ACGTGATATCTGGCAAAACGACCAGTGGCGTATTGTCGGTTTCCTGACAATTTTCAATATCCTGGCGGTG
TGCGTACGCGGTGGGGCGATGATGTATTACGTCACATGGATTTTGGGTACGCCGGAAGTGTTTGTCGCTT
TTCTCACCACTTATTGCGTGGGTAACCTGATTGGTTCCGCACTGGCGAAACCGCTGACCGACTGGAAATG
TAAAGTCACTATCTTCTGGTGGACGAACGCCCTGCTGGCAGTGATTAGCCTCGCGATGTTCTTTGTTCCT
ATGCAGGCCAGCATCACCATGTTTGTCTTCATCTTCGTGATTGGTGTGTTGCATCAACTGGTGACACCTA
TCCAGTGGGTAATGATGTCCGATACCGTCGACTACGGCGAGTGGTGCAATGGTAAACGCCTGACCGGGAT
CAGTTTTGCTGGCACGCTGTTTGTGCTCAAACTGGGGTTGGCCTTCGGTGGTGCCCTTATCGGCTGGATG
CTGGCTTATGGCGGATATGATGCGGCAGAAAAAGCGCAGAACAGCGTCACAATTAGCATCATTATCGCGC
TATTCACGATTGTTCCGGCGATCTGTTACTTGCTGAGCGCGATTATCGCTAAACGCTACTACTCACTCAC
GACGCACAATCTGAAAACCGTTATGGAACAGCTGGCTCAGGGCAAACGCCGTTGCCAGCAACAATTCACC
TCTCAAGAAGTGCAGAACTAAGGAACGGCAATGAAAATTAGCGACGGAAACTGGTTGATTCAACCTGGCC
TCAATTTGATTCACCCGCTTCAGGTGTTCGAGGTTGAACAGCAGGGTAATGAAATGGTGGTCTATGCTGC
CCCCCGTGATGTGCGTGAACGTACCTGGCAGCTTGATACACCTTTATTTACGCTGCGCTTTTTCTCCCCA
CAGGAAGGTATTGTTGGTGTACGGATTGAGCATTTTCAGGGGGCGCTGAATAACGGTCCTCATTATCCGC
TCAATATTTTGCAGGATGTGAAGGTCACAATCGAAAACACAGAACGTTATGCTGAGTTTAAAAGTGGCAA
CTTAAGCGCGCGTGTCAGCAAAGGTGAGTTCTGGTCACTGGATTTTCTGCACAACGGCGAACGTATTACC
GGTAGTCAGGTGAAAAATAATGGCTACGTGCAGGACACGAATAGTCAACGAAATTATATGTTTGAGCGGC
TGGATCTTGGCGTTGGCGAAACAGTTTACGGTCTGGGAGAGCGCTTTACTGCCCTGGTGCGCAATGGCCA
GACGGTAGAGACCTGGAACCGGGACGGCGGCACAAGTACTGAACAGGCGTATAAAAATATTCCGTTCTAT
ATGACTAACCGTGGTTATGGGGTACTGGTCAATCATCCTCAATGCGTCTCTTTTGAAGTGGGATCGGAGA
AAGTCTCCAAAGTGCAGTTCAGCGTTGAGAGTGAATATCTCGAATACTTTGTTATCGACGGCCCGACGCC
GAAAGCGGTACTTGATCGTTATACCCGTTTTACTGGTCGTCCGGCGCTGCCGCCCGCGTGGTCCTTCGGC
CTGTGGCTAACCACTTCATTTACCACCAACTACGACGAAGCGACGGTAAACAGCTTTATCGATGGTATGG
CGGAACGCAATCTGCCACTGCATGTTTTCCACTTTGACTGTTTCTGGATGAAAGCCTTCCAGTGGTGCGA
TTTTGAGTGGGACCCGCTGACTTTCCCGGACCCGGAAGGGATGATCCGCCGCCTGAAAGCGAAAGGGCTA
AAAATCTGCGTCTGGATTAACCCCTATATCGGGCAAAAATCCCCTGTCTTTAAAGAGTTACAAGAGAAAG
GCTATTTACTCAAACGCCCGGACGGTTCGTTATGGCAGTGGGATAAATGGCAGCTAGGTCTGGCGATTTA
TGACTTTACCAATCCGGATGCCTGCAAATGGTACGCCGACAAACTGAAAGGTCTGGTCGCGATGGGCGTT
GATTGCTTTAAGACCGACTTTGGCGAACGTATTCCAACCGATGTTCAATGGTTTGATGGTTCCGAGCCGC
AGAAAATGCATAACCATTATGCGTACATCTACAACGAACTGGTGTGGAACGTGCTCAAGGACACCGTTGG
TGAGGAAGAAGCCGTCTTGTTTGCCCGCTCGGCCTCCGTCGGTGCGCAGAAATTCCCGGTACACTGGGGT
GGTGACTGTTACGCTAACTACGAATCAATGGCGGAAAGCCTGCGCGGTGGTTTGTCTATTGGCCTTTCAG
GTTTTGGTTTCTGGAGCCACGATATCGGCGGCTTTGAAAATACCGCTCCGGCGCACGTTTACAAACGCTG
GTGCGCGTTTGGTTTGCTTTCCAGCCATAGCCGTTTACATGGCAGCAAATCTTATCGTGTGCCGTGGGCC
TACGATGATGAGTCCTGTGATGTGGTGCGCTTCTTCACGCAACTGAAATGCCGCATGATGCCGTATCTGT
ATCGTGAAGCTGCACGTGCAAACGCGCGGGGTACGCCGATGATGCGGGCCATGATGATGGAGTTCCCGGA
CGATCCGGCTTGTGATTACCTTGACCGTCAATACATGTTAGGCGACAACGTGATGGTTGCGCCTGTGTTC
ACTGAAGCGGGCGATGTGCAGTTCTACCTGCCGGAAGGTCGCTGGACACACCTGTGGCACAACGATGAAC
TCGACGGTAGTCGCTGGCATAAACAGCAGCACAGCTTCCTGAGTCTGCCCGTTTATGTGCGTGATAGCAC
CCTACTGGCGCTGGGCAACAACGATCAACGTCCCGATTACGCGTGGCACGAAGGTACGGCATTCCACCTC
TTTAATCTGCAAGACGGGCATGAAGCCGTCTGTGAAGTGCCCGGTGCTGACGGTTCGGTGATCTTTACTT
TAAAAGCAGCACGTACTGGCAACACGATTACTGTGACTGGTACGGGCGAGGCGAAGAACTGGACACTGTG
CTTGCGCAATATTGTGAAAGTAAATGGTCTGCAAGGCGGTTCGCAGGCTGAAAGTGAGCAGGGACTGGTG
GTGACTCCTCAAGGGAATGCGCTGACAATTACGTTGTAATCTATTGAAGAATGCCGGATACGAATGGTTT
TGTGTCGTATCCGGTAAATAATCTCACATCTGGTAATAAATATTTCTTCCATCGTATTTGCGAGCATGAT
CACGATTATTCATCACGAAAATGTGATCTGTGCTGAAAAATATCCCTTAACCGCCTTGCTTTGTTTTATC
ACTGTCCGGATTACGGACAGATTTTAGTATTGTTGTGAAATTATTCTGCTTTATATTTACCCTCAGAGAT
GGCAACTGAAGCTCTTCCATATGGGGCTTCTTAATCTGTGATAAGGGTAAAAAATGCAAATGATTACCTC
GCGACAAAACAGATTATTACGATTCCTTTTACCTCGAAGGGAATATACGACTATTGTTACGATTGCCGGC
TATTTAAATGTTTCGGAAAAAACCATTCAACGTGATTTACGTTTACTTGAGCAATGGCTGGGACAATGGA
GAATAAATGTTGAGAAGCGTGCTGGCGCGGGTGTGATGTTAAGCGCGGAGAATATTGCTGATTTGCTGCA
TCTTGATCATTTGTTGGTGGCAGAATGTGAAGAGATTGATGGTGTAATGAATAATGCCAGGCGCGTTAAA
ATAGCGTCGCAGTTATTAAGTGAAACACCGAATGAAACGTCGATCAGTAAATTGTCAGAACGCTACTTTA
TCAGCGGAGCCTCTATTGTTAATGACCTGAGAGTAATTGAGTCCTGGCTTGCGCCGTTGGGGTTATCGTT
GATCCGCAGTCCAAGTGGTACGCATATTGAAGGTAGTGAAGGGCAAGTCCGACAGGCAATGGCATTACTG
ATTAACGGCATTATTAACCATAATGAGACGCAAGGTGTCGTGTATTCACGTCTGGATCCCGGAAGCTATA
AAGCATTAGTCCATTATTTTGGAGAAGAAGCGGTGTTATTTGTCCAGTCATTGTTACTGGATATGGAAAA
TGAATTAAGTTGGTCTTTGGGAGAACCTTATTACGTTAACATTTTTACTCATATCCTTATTATGATGTAT
CGCAACACGCACGGGAATGCGTTATCAAGAGAAGAAGATCAAACCAGGCAATATGATGAAAATATCTTTA
ATGTTGCCAGTCAGATGATTCATAAGATAGAACAACGAATTGCACATACATTGCCCGATGATGAAGTCTG
GTTTATTTATCAATATATCATTTCATCAGGTGTGGCGATTGATGGACAAAAAGATGTTAGCATTATTTCA
CATATGCAGGCCAGCAATGAAGCGCGTCTGATTACCTGGCGTTTAATTACGGTATTCAGTGACATCGTGG
ACTGCGATTTTAGTGAAGACAGCGCATTATATGATGGCTTATTGGTGCATATTAAACCGCTGATTAACCG
ACTAAATTATCGTATTCATATCCGTAATCCATTGTTGGAAGATATTAAAGCAGAACTAGCGGATGTCTGG
CGGTTGACGCAATATGTGGTGAATCAGGTATTTAAAACCTGGGGTGAGAATGCAGTGAGCGAGGATGAAG
TAGGTTACCTGACCGTTCATTTTCAGGCTGCGATGGAGCGGCAAATTGCCCGTAAACGCGTATTACTGGT
CTGTTCAACCGGAATCGGAACTTCGCATCTACTGAAAAGCCGTATTCTGCGAGCATTTCCTGAATGGACG
ATTGTTGATGTTATTTCAGCAGCGAATTTATCACAGGTTTTGCCTGACAATATCGAACTGATTATTTCGA
CCATTAATTTGCCTACAGTCACTATGCCGGTCGCTTATGTTACCGCTTTTTTTAATGATGCCGATATTAA
GCGGGTCACTGAAATGGTGATTACGGAAAAATTACATCATGCGACATCTCGGGTCGTTGAAATTTAATGT
CAGAATTTTATGAGGTATGACGAATGGACATAACAAAAATCCTGAATACGAATCGCGTTATTTTAGATAT
GCAAGCGACGAATAAAGAGGAGGCGATTGAAGAATTAACTAATCTTCTCAAAAAAGATGGTGCGATCGAT
TGTCGGGAAACCTTTATTAAAGATGTCTGGCAGCGCGAAGCGGAAGGCTCGACTGGTTTTGAAAATCATA
TTGCGATCCCGCATGGTAAATCTTCAGCTGTGATTAATACTACGCTGGCAATTGGCCGTACCCGGCAGGA
TATTCCCTGGGAAACGCTGGATGGCAGTAGCGTGCGCTGTATTATTTTATTTGCGGTACGTCTTGAAGAT
CAAAATACCACCCATATCCGTTTACTTTCCCAGGTCGCGGGCGCACTGGCGGATGATGACATCATAGAAC
AATTGTTAGTTGAGACGAGTCCGCAAAAAATCATTGATCTCTTTAGTCAGTATGCACAATCCGATGTCTG
CTAAATAACAGGGAGTATGTCATGAATATTGTCTGTGTTGCCGCCTGTACGGCGGGTATTGCTCATACCT
ATATTGCTCGTGAAAAGTTAATCAAAGGAGCAAAAGCTCTGGGTCATACCATTAAAGTTGAAACCCAGGG
AACCATTGGTACAGAAAATGAATTACAGGCGGCAGATATCTCTGCTGCTGACGTCGTGATTCTTGCTGTA
GATGTGAAAATAAAAGGAGAAGAACGCTTCACCAATAAACGTATTGTGCGAGTAAAGACAGAGATCGTCA
TTAAATCGCCCGTTCAATTTCTTGAAAAGGTCGAAAAATCACTGGGAAACAAATGATCCTTATACTGGAG
GGATCTTAATATGAAAGACAATAAAATTCCGGTTTCACAGGAAATTAAAAAACATTTATTAACCGGCATC
TCGTGGATGATACCCCTTATTGTGGCCGCCGGGATATGTATTGCGTTGGGGCAAGTTCTTGGCGGTACAG
ATGTTGGTGAAAAAACAGGAACAATCCCGTGGATGCTTAATCAGATTGGCGGCTGGGGAATGGGGCTGAT
TGTGCCGCTGATTAGCGCGGCAATTGCCTATTCTATTGCCGATCGTCCCGGATTTGCCCCAGGCCTGATT
GTCGGCTTTCTCTGCGGGCAAATCCATACCGGATTTATTGGCGGTATGTTGGGTGGTTTCCTGGTGGGCT
ACACCATTTTGCTACTTAAACGCTATATCCGCCTGCCGCAGTCGATGCAAGGACTCATGCCAATCATGGT
GTTGCCGGTATTAAGCACCATTATCGGTGGGCTGTTAATGATGACGCTGATTGGTAAACCCATCGCCTGG
TTACAAGAAGCACTGATTCATTTGCTCGAGTCGATGCAGGGCGGATCGCGCTTCCTGATGGGGGCCATAC
TTGGCGCGATGGCAACCTTCGATTTCGGTGGTCCGGTCAACAAAACCATGTCGCTGTTTTCCGATGGCTT
GCTGGTCAGTGGCGTCTACGGACCAGAAGCCGTGAAATTTGTCGGCTCAATCATCCCTCCGTTTGGCATC
ACACTTTCGTTCTTACTGACACGCCATAAATACACCCGTGCGGAGCGCGAGGCGCTGAAAGCCGCGTTTC
CGATGGGGATCTGCATGATCACTGAAGGAGTCATTCCGATCGCCGCGCGTGACCTGCTGCGAGTAGTGGG
ATCTTGTGTGGTGGCATCGGCGGTCGCGGGCGGCTTAATCATGGTGTGGGGCGTGGAGAGTCCGGTTCCG
CATGGCGGCATGTTTGTTGTGCCTCTGTTCACCCATCCTCTGCTGTTTTGCCTGGCGCTGGGTATAGGCA
CGGTGATTTGTGGCGTGATGCTTTCACTCTGGAAGAAACCGGTAACGGAACGCGACGAAGAGTTTGACGA
ACTGAGCGATCAAAAGCTGAAAGATGAAGAGATCACTTTCACCCTCGAATAACCGGAGGCCCTATGTTTG
CCGATATGAAAAGTATGGTGATGAAAGCCTGGCATGAACATTACGCCTTGCTGGCGATCAACTGTATGAA
TCTGGAAAGTGCTCACGCAGCTATCCGCGTGGCGGAGAAGAATCGCGCTCCGATCATTCTCAATCTCTAT
CAGGGGCATCTGGCGCATTTTCCTGCACCCGTCGCGGCGGCAGTGGTTAAAACGCTCGCGGAATCTGCCT
CAGTACCGGTCACTCTGGCGCTTGATCATGGCAAAAATCCGGACTGTATTCGTCAGGCGTTTCGTGCTGG
TTTCAGCGGATTAATGATTGATGCTTCTGCTTTTCCCCTGGAGGAAAACGTGCGCCAGACCAGGGCGGTG
GTGGAACTCGCCGCCAGCGCGCAGCTCTGCGTGGAAGGCGAACTGGGCCATCTGGCAGATGCGCCGCGTT
ACGACCAGGCCGCCAATGCAGACCTGATGACGCAACCCACTGATGTGGAACCGTTTATCGCGCAGACAGG
CATTGATCTACTGGCCGTCTCGGTAGGCACGGCGCACGGCATGTACGCGCCTGGTGTTGTACCTGCTATT
GATTTTCAGCGTCTGGCGGAGATTTTCCACTGCTCGAGCGTGCCTCTGGCATTACATGGCGGTAGCGGTA
CGCCGTTCGATCAGCTCCAGCTCTGTACGACTCTGGGGGTAGCAAAAATCAACGTGGGGGCGGCCATTTT
TGAACGGGGGAAATCCGCGCTCCTGCATACCCTCTGTCACGATATATCCATTGAACTGGTGGACGCGCTG
AAAGCTATGGAACTGGCCTTCGAAGAAGCGATTACACCGTATTTACAGGCGAGCGGCGCTATTGGCAAAG
CCTGATTCATTTTCTGTCATGGCCTTTATGCCAGTGCAATAACGCACCGGCAGGGCGGACTACACGCTGA
AACTGGAGATTTAACATGTTAGTTTCGATGAAAGAATTACTGCAACCTACCCGCCAGCACGGCTTTGCCA
TTGGCGCATTTAATGTGGCGGATAACTGTTTCCTTCGCGCAGTCGTGGATGAAGCAGAAGCGACAAATAC
TCCGGCGATTATTGCCATCCATCCCAGCGAACATGATTTTGTGGGCGATGCCTTTTTCGCTCACGTTCGC
GAAATTACCCAGCGTAGTCCGGTCCCGTTTGTACTGCACCTCGATCATGGTGCCTCTGTAGAGCATGTTT
TGCGTGCGATTCGCTGCGGATTTACCTCAGTAATGATCGACGGTTCGCTGCTGCCGTATGAAGAAAACGT
GGCGCTGACCGCAGAAGTGGTTCGCCTCGCTCACGCGGTTGGCGTGTCGGTTGAGGGTGAACTGGGAACC
ATCGGACAAACAGGAACGTCGGTAGAAGGTGGTGTTTCACAAGTGACCTACACAGATCCGGCGCAGGCCG
CCGATTTTATTGCTCGTACAGGTGCTGACACACTGGCTGTGGCGATTGGTACAGCGCATGGCATCTATCC
TAAAGGGATGCAGCCGAAGCTGCAAATGGACATTTTGCGCGACATTGCCGGACGTATTGATATTCCGCTG
GTACTACACGGTGGTTCGGCAAACCCGGACGCGGAGATTGCTGAATCAGTTACGCTCGGCGTCGGCAAAA
TCAATATCTCCAGCGATATGAAATACGCCTATTTCCAGAAAGTGCGTGAAATTCTCGCTAAAGAGAGCTG
GTGGGACCCGAACGTCATCTATCCGGATGCGATTAACGCGGCGCGGGAAGTCATTCGCCACAAAATGAAA
CTGTTCGGTTCGTTCGGTAAAGCATCACTGTACTAAGCCAGAAGGGCGGGGTGACCCGCCTTTTACGCAA
CAAGGAACGAGATATGCACTATCTGGGGTTGGATATTGGTGGGACCAAAATCGCCGCCGTTGTCATGGAT
GCGCATGGCTGGGAGATTCGCCGTTACCGCTGCCCGACGCAAAAGTCGACATATCAACAATTTGTCTCAT
GCGTTGTGGCGCTTATCGAGCAGATTAGGCGGGACGTTCAACGACCGATGCTGACAGGGATCGCCTTACC
CGGCAGTATCTCGCCACTCACTGGCCTGATTAAAAACGCGAATATTCAGGTGATTAACGGTCATGCGTTA
CAGGCTGATTTGCAGCAATTGCTTGGGCAACCGGTGGTGATAGCCAATGATGGTAACTGTTTCGCGCTAT
CAGAAGCTTGCGACGGTGCCGGGCAAGATTATGACGTGGTATTTGGTATTACGCTTGGTACGGGCTGCGG
CGGTGGCATTGCCATCAAGCAACGACCGTTTATAGGGGCCTGGGGAAATGCTGCCGAATGCGGTCATATC
ACGTTGCCAGGCTATACGGAGCAGGAAGATGGTCCATCAGTCAGTTGCTATTGCGGCAAACACAACTGCG
TGGAGTCGTTTGTTTCCGGCAGCGGTTTTAGTGAACGCTATCAACAGATGACTGGTAACTTGCTCACTCC
TGCGGCGATTGTCACCCTGGCACAACGTGGTGATGCTTGTGCCATGCAGCAGGTGGCACGTTTTCGCCAA
CAGCTTGCCCGCACGCTGGCAACCATCGTTAACGTTGTTGACCCTGGCGTGATTGTGATCGGCGGCGGGC
TTTCGAATGTGGAACTGCTTATCACCGATCTGAACGCAGAAGTCGCTCCACTGGTTTTCACCGATCAATT
CACCACTCCCATTGTAAAAGCACAGCACGGCGACAGTAGCGGAATGCGTGGCGCTGCCTGGCTTGCTATG
CGCAACGGAGAAGCCAATGAAACGTTCACAAATTAATTATGTTATTGATAAAGCACATGCCATTGCGCAG
ACCTTCCGCGTTTGTTTGCCAGAGTTCGCCTATTTTACGGTGGATGACTGGCTGCAGCGGGAACGGGATA
ACTGGCAAGAAGTGGTCGACTTACAGCTCGGTTGGGATATCACCGATTTTGGTCGTGGTGATTTCAACCA
AACGGGACTAACACTGCTAACGATGCGCAACGGCGCGCTGGGGTCGGCGGCATATCCAAAACCGTATGCT
GAGAAAATGTTGCAGATCCAACAAGATCAGCAGACTCCCTGGCATTTTCACACCCACAAAATGGAAGATA
TCCTCAATCGGGGCGGTGGAGACTTATGCATGCAGTTGGCCTGGGCCAACGAAGCCAATCTCTGTGATGA
TCAACGAGTCATTACCGTGAGTGTTGATGGTCAGCGGCGTACCATGAAACCTGGTGAAACGCTGGTGCTA
AAGCCGGGGCAGGGCATTTGCCTGCCGCCGCGTCTGTATCATCGCTTCTGGGCGGAAAAAGCGTTTGTTC
TCGGCTGGGAAATCTCGATGGTAAATGATGACCAACACGATAATTATTTTCTTGAGCCGGGAGGACGTTT
TCCGGCGATAGAAGAAGATGAACCGGTGAAATGGTTATTGTGCAGTGAGTATGGAATTTTGCGCTAATAA
CGGGGAACGCTAGCGCTGATATCCGCTAGCGTCCTTATTTTTACTGCACCGGCTCCGTCGACGTAACTTC
ACCACTGGAAACTACGCCCGCATTCATGGTTTGAGTCACTTGCTGCTTTGCGGCATTCACGGCATGCAAT
TGCCCGCTAACCGTAGGTTTCAGCGGGACATTGACCTGAAGATCGCCACTGGCGGTAAGCTGAATATTGC
CGTCGCCAGTCAACGGTAATTCAGGCCATCCCCAATGTTGCAAAATATTCACCGGCACACCGCGTCCATT
CAGGCTGATATGGGTCTGACGTTGTGGCGTTTGTGAAACACTGGCGGTGGCTTCCAGAATGCCTTTTTCA
GTAAATGCACTCAGTTCGCTGATATTCACCGTGCTGCTGTTGGCAGTTAGCGCCAGCGACGGACGACGGA
CATCAACACGATTAAACGTTGCGGCGGCGGCATTCAGATTCGCCGAGCCACTCCAGACGCCCCATTTATG
ATCGGTAACCAGCGTCAGATTGGCACCGTAACCATCGAGCGCGGTGAGCTGCCACGGGAAGTCAGGGTCG
ATATCAATGATCAGATTGCGGCTGGCGCTAAATCTCTTCAGTTGCAGGCTGTTTAACCAACCGGGTGTCG
TTTCCATCCACAACTGTTGCCAGTTTTTGGGCAAGGTATATTCCAGTCCGGCAATTGCCGCATCATCGAG
GATCAGCGTTTTCCCGTCGCGTTGCCAGTTTCCTGACGTTCTGACCATACCCCCTTCCCAGCGGCTGGTG
AACTGGCGCAGTGCTACGCCCTGCGGGGAAAATTCCGCGTTTATAATCGGATCAAATAAATGCAGCGAGC
CATAAATAAACTCGCTGGCGTTCATCGACAGTTTACCTTCCTGTGTCTGCCAGTCATCTTTACTGAAGGT
CATGTTGCGCAAGCTGAGATCGAGGTCGGCCACCGCCCAGTCCGGACCTTGCAAACGAGCGTCGATGACT
TCCAGGCGACCAATCTGCAACGACGGGACAGAGCGTAATGGTGCAAAGAAGTCGGTTAGCGATTTTTCGC
TTTGTAGACGGATATCCGCCATGCGCAGGTTTTCCACTTGCCAGCTGCCGTCAGCGTTACGCTGCGCGTT
TCCGGTTAATGTCCCGCGGGCGATGTCGGCACCCAGGTTAGTCAGCGTAACGCGATCGTTATCAATACTG
CCTTCAATCAGTACATTGGTGGCAGGAACATCATTGAGCGAAAGCGATCCGGCACTAAACTGAATCTGTG
CCTTCGTACCCAGCACTTTACCGGCTTCTGGTGACCACGGAACCACGCCGCCATTTACCCGCTGCGCGCT
CAGTTTCCATTCGCTATTCGGGCTATTAAACGCCATATCACGCAGTTGCAGACGATCGGCTTTGAACGGT
AGCGGCGCGGTCTGGTCGGTGAGATTCAGCGTCCCGTTTTCCAGCAGGATGGTATCGACATGGCGTGGTT
CGGTCAGTTGCCGACTGCTTAGCGCAATGTCGACACTTTTTGCCACCAGGGTCGCGGGCTGGCCATCACG
GCCAAACGTGACGTTCTCCAGCACGATATGAGATGGCGCGGAAAAACGGTGATCCATCGCCCCGAAGGCC
AGATGATAGTCGCTATTCTCGGAAACCCATGCGCTGATATGTTCTGCTCCCCAGCGAGTTTGCAGAAGAA
AATAGAGGCCAGCGATCACCACTAACAGAGCGATGAGAATGTAGAGAAGCAGCTTCCCAATAAATTTCAT
GGTCTTCCATCCCGTGAAATGCACATAAGGGAGTTATGCACGATTTACGCGCAATCCTCAAGGCGGGAAT
GGTGAAAGAGGTGAGACTGCGGCGGTAATTATCTTACCGCCGCCAGTGAATTACTGTTTTTCTGGTGGGA
AAATCAGATTCAGCACGATGGCAGTAATACCGCCCGCGGCAATCCCGGAGGAGAGCAGGTTTTTCAGCCA
TTCAGGAGCAAACTGCAAAATCAGCGGCTGCTGAGACACGCCCAGACCGACCGCCAGCGACAGCGCGATA
ATCAGAATCGCCCGGCGGTTCAGCGGCTCACGAGAAACGATACGCACACCGGAGGCGGCGATGGTGCCAA
ACATTACAAGCGTTGCGCCGCCCAGAACCGGTTCTGGAATGTGTTGTACAAAACCGCTCACTGCCGGGAA
CAGACCCAGCACGATCAACATCAGCGCGACGACAAAACCGACATAGCGGCTGGCAACACCGGTTAACTGG
ATCACCCCGTTGTTCTGTCCGAAGCAGGAGTTCGGGAAGGTATTAAATACCGCCGAGACAAACGAGTTCA
GGCCGTTTGCCAGCACGCCGCCTTTCAGACGTTTCATGTACAGCGGACCGGAAACTGGCTGTTCGGAAAC
GTCAGAGGTCGCCGTGATATCGCCAATGGTTTCCAGCGAAGTGATCATAAAGACCAGCATCAGCGGCAGC
AGCAGACTCCATTCAATGCCAAGACCATAATAGAGCGGCGTTGGCACCATAATCAGTTCTTGTGTCATCG
GTTCGTTGCTTTCTGGCAACATGCCCATAAACCACGCCAGCGCATATCCGGCCGCCATCGCAATCACCAG
TGAGGCCACGCGTAAGTAAGGGTTACGTTGACGGTTAAGCAGGATAATTAAGGCTAAGACCACGCCTGCC
AGCAGCAGATTTTTCGGTGCGCCGAAGGTGTTATCGCTCATGGCTGCGTAACCGCCGCCAATGGAGGTCA
GCCCAACCTGAATTAGCGACAGGCCGATAATCATCACCACAACGCCAGAAACCAGCGGCGTAATAATGCG
GCGCGCCAGATGCAGAACGCGGGAGATCACCATCTCGGTACAACTTGCCAGCATCAACGTGCCGAACAAA
GCTGCCATCATGGTAGGAACATCAGCACCACCGGTCTTCAGCGCTGTGCCGCCCATAATCAGCGGAGCAA
CAAAGTTGAAGCTGGTGCCCTGAATAGACAACAACCCGGAGCCAACCGGACCCCAGGCCTTAATTTGAAT
AATCGATGCCACACCGGAGGCAAACAGCGACATACTAATAATGTGTTGCGTGTCTTGTGCCGGTAAACCC
AGCGCCTGGCAGATTAATAGCGCTGGCGTGATCACCGCAACGAACATCGCCAGCAAATGCTGACAGGCGG
CAAACAGGGTTTGAGGAAGCGGCGGACGATCTTCAAGACGGTAAATCAGTTCGCTGTTTTGAGTCTGCGC
AACCGGTTGCGCATTTTCTGACTCGAGGGTGGAAACAGACATCGAAAACAATCCCGTGGTAGCAAAGCGG
GCATTTTAGCTGACCGAAAGAGAAAAGCAAACGTTTGCCACATCCTCATCTAAATATTTAAATGAGATAA
ATGTACTTTTTTATATAACTTTTAGTTGTTTTCTGCTTAAAATCCATGCCATTTTTCTAGTTTCAGCTAA
GAATTCGAACCAGGAAAGCATGACTCGATACTCGTCATATTTCGCCTTACTGCAAATGCGCGATGAAGTA
TGACGAGTATGAAAGAGTGATGCGGACACAAAGGAGTAACTATGTTTCATCTCGATACTTTAGCAACGCT
TGTTGCCGCAACGCTGACGTTGCTGCTCGGGCGCAAGTTGGTCCATTCCGTCTCCTTTTTGAAAAAATAC
ACCATACCGGAACCTGTTGCGGGTGGTTTATTAGTGGCGCTGGCGCTGCTGATACTGAAAAAAAGCATGG
GCTGGGAAGTCAACTTTGATATGTCCCTGCGCGATCCGTTGATGCTGGCTTTCTTCGCCACCATTGGCCT
GAACGCCAACCTTGCCAGTCTGCGAGCTGGTGGGCGTGTGGTGGGGGTTTTCCTGATTGTGGTTGTTGGC
CTGTTGGTGATGCAAAATGCCATTGGCATTGGTATGGCTAGCCTGTTAGGGCTTGATCCGCTGATGGGGC
TGCTGGCCGGTTCTATTACGCTTTCCGGCGGTCACGGTACGGGTGCTGCATGGAGTAAATTGTTCATTGA
ACGTTATGGTTTCACCAACGCGACAGAAGTGGCGATGGCCTGTGCAACGTTCGGTTTGGTGCTGGGCGGC
TTGATTGGCGGTCCGGTGGCGCGCTATCTGGTGAAACACTCCACCACACCGAACGGTATTCCGGATGACC
AGGAAGTTCCGACGGCGTTCGAAAAGCCGGATGTGGGCCGCATGATCACCTCGCTGGTGCTGATTGAAAC
TATCGCGCTGATTGCTATCTGCCTGACGGTGGGGAAAATTGTTGCGCAACTTTTGGCTGGTACTGCTTTT
GAACTACCGACCTTCGTCTGTGTACTATTTGTTGGCGTGATTCTGAGCAACGGTCTGTCAATGATGGGCT
TTTACCGCGTCTTTGAGCGTGCGGTATCCGTGCTGGGTAACGTAAGCCTGTCGTTGTTCCTGGCGATGGC
GCTGATGGGGCTGAAACTGTGGGAGCTGGCTTCGCTGGCGTTGCCGATGCTGGCGATTCTGGTGGTACAG
ACCATCTTCATGGCGTTGTATGCCATCTTCGTTACCTGGCGCATGATGGGCAAAAACTACGATGCGGCAG
TGCTGGCTGCGGGTCACTGTGGTTTTGGCCTCGGTGCAACGCCAACAGCAATCGCCAACATGCAGGCGAT
CACTGAACGCTTTGGCCCGTCGCACATGGCGTTCCTGGTCGTGCCGATGGTCGGTGCGTTCTTTATCGAT
ATCGTCAATGCGCTGGTGATTAAGCTGTATTTGATGTTGCCGATTTTTGCCGGTTAACCGATGAAGCGGC
GGTCTTCTCACCGCCGCTTTTTACGCATTCGAGTAACGTTCCGTTTCCGGCATCCAGCGTTCTATCAGGG
CTTTTGCCTGTTGTGGGTAACGTTCGTGAATATGTCGCGCCAGGCGCTGAACTTCCGGGATCATCGCCTG
ATCGCGCAGTAAATCCGCCACTTTAAATTCAGCATTACCCGTCTGACGTGTACCTAACAATTCGCCAGGG
CCGCGAATTTCCAGATCTTTCTGTGCAATCACAAAACCATCGTTGCTGTCGCGTAGTACCTGCAGGCGGA
TTTGCGCGGTTTTGGAGAGCGGCGTTTTGTAGAGCAGCACGCAGTGAGAAGCCACCGCGCCACGGCCCAC
GCGGCCACGTAACTGGTGCAACTGCGCCAGACCCAGACGCTCCGGGTTTTCGATAATCATCAGACTGGCA
TTGGGTACATCAACACCGACTTCAATGACAGTAGTGGCAACCAGCAGGTGTAGCTCGCCTTGTTTAAACG
ATGTCATCACCGCCTGTTTCTCTGCGGGTTTCATCCGTCCGTGTACCAGGCCAACATTCAACTCTGGTAG
CGCCAGTTTCAACTCTTCCCAGGTCGCTTCCGCCGCCTGCGCTTCCAGTAATTCCGACTCTTCAATCAAC
GTACAAACCCAGTACGCCTGACGCCCTTCAGTCATACAGGCGTGGCGCACGCGGTCAATGATATCGATAC
GGCGGGTATCAGGAATAGCGACCGTAGTCACTGGCGTGCGGCCTGGTGGCAGCTCATCTATCACCGAGGT
ATCGAGATCGGCATACGCAGTCATCGCCAGCGTGCGGGGGATGGGCGTGGCGGTCATGATCAACTGATGC
GGATGGAAGCCCTGCTGCTGACCTTTCTCCCATAACGCCAGACGCTGATGCACGCCAAAACGATGCTGTT
CGTCGATAATCACCAGCGCCAGGCCGTTAAACTGCACCTGTTCCTGGAAAATGGCGTGCGTACCAACAAT
CATCTGCACCTGACCGCTGGCGATGGCTTCTTGCTGAGCCAGTCGTGCTTTACCTTTCTGTTTTCCGGCG
AGCCAGCCTACTTCGATACCGAGTGGTGCAAACCAGTTACGGAAGTTATTGGCGTGCTGCTCGGCGAGTA
ATTCGGTTGGTGCCATCAGGGCCACCTGTTTGCCGTGGGCAACCGCACGCAACGCGGCGAGGGCGGCGAC
CAGCGTTTTACCGGAACCTACATCGCCCTGCACCAGGCGCATCATCGGCACATCCAGCGCCATATCGCGC
TCGATCTCCGCCACTACGCGTGCCTGTGCGCCCGTTGGCTTGAACGGTAAGGCGGCGAGGAGTTTATTTT
TCAGCGCGTCATTGGCGCTCAGCGGCTGAGCATGAAAACGTTGTGCACCGGCACGTAACGCCAACATGCT
GAGGTTGTGCGCCAGTAGTTCTTCCAGAATCAGACGGCGTTGTGCCGGATGCTGCCCGGTTTCGAGATCG
CTAAGCTGTAGCGTCGGCGGCGGGCGGTGCAAAGTGCGCAACGCTTCCGGTAGCGTCATCATTCCTTGTG
ACAGTTCCGGCGGCAGGAGTTCTTCAATGGCGCATGTGTCGAGCAGATCCAGCGCCTGGTCGGTTAATTT
ACGCAGCGTAGCCTGCTTTACGCCTTCCGTAGTTGGATAAACCGGTGTGAGCGTTTCCTGTAACTCTGGC
GTGCTGAGATCGCCCTGTACGCGGTATTCCGGGTGGATCATCTCCGCACCATATTTGCCGCGCTTTGCTT
CGCCATAGGCCAGCACGCGGCGGCCTGTCGCCAGGCTATTTTTCATTGCCGCATTGAAGTTGAAAAAGCG
CATAGTGAGAATGCCGGAACCGTCGCTGATCTGGCAGGTCATCATCCGCCGACTGCCGAAGGAGATATTG
CAGTTCAGCACTTCGCCTTCCACCGTGGCATAAACACCCGGCAGTAGTTCACCGATGGGGTAGAGATGTG
TGCGATCTTCGTAGCGCAGAGGAAGGTGTAAGAGCAAATCCTGTACGGTATGCAGGTTGATTTTCGCCAG
CTTGTTACTAAGCGCTGCGCCAACGCCCGTTAGGGAACTGAGCGGGACAGCATCTAACAGGCGACCTTTC
ATCGCGCTTACCCTGCGGCCTGCATGGTGGACCACCAGTCAGCATCGGCTTCAATCTCGCCTTGCTGATT
AACGTGGGGGTAGGGCAGACCTTTGCGTTTTGCGACTTTCGCCAGCACCGGATAGCCACCTTCAAACAGC
AGGCGTTGTTGCTCGGTTTCCGGCAACATGCTGTTTTCACGCAGGTACATGCCCGCATTTTGCCGCTGGC
GCTGGGCTTCGTAAAGAATGAGGGCTGAGGCAACGGAAACATTCAGCGACTGCACCATGCCGATCATCGG
AATGATGATATCCTGATCCGCCAGGGCCAACGCTTCCTGCGTGATGCCCGTTTTCTCCTGTCCCATCAAA
ATACAGGTCGGGCGAGTGTAATCAATTTCGCGGAAATCAACAGCGTTATCAGAAAGATGGGTTGTCAGAA
TCTGCATGCCCTGGCCTTTCAGATGAGCGACGGCATCGCCAATGGTGCGGTGCGTTTTCACCTGTACCCA
GCTGTTACTACCCGCAGCTGCCGAAGCCATGGTGCGCATCCGGCTGCCAGGCCAGACAGCATGAACTTCA
TGTACGCCAACGGCATCTGCGGTACGAATAATCGCAGAAACGTTATGAGGTTTGTGGACCTGCTCCATGC
AGACGGTCAGATCAGGCTGCCGCCTGGCGAGCATTTCGCAGATGCGTGCATAACGTGTTGGGTTCATAAA
ACATTAATTTCGGTTTCGGGTGACTTTAATCACGTCTGGCATCACGCGGATTTTGCGCATGATATTCGCC
AGATGCACACGGTCACGAGCGGTCAGACGAATAAAGGCGCTGTAGACGCGACCATCTTTCTCTTCCGTAT
TCAAACTTTGAATATTCGAGGTCGTGGTGTTAATTGCCGCCGTCAGGTTTGCCAGCGCACCCTGATGATT
GAACATCTCCACCTTGATTTCGGTGATGAACTCCTGCGCCGTCTCTTTATCCCATTCCACAGCCATAAAC
TTCTCTGGCTCTTTCTGGTAGCCACGGATGTTACGGCAGGATTCATGGTGGATCACCAGACCTTTACCGG
GGCTGACGTGGGCGATAATCGGGTCGCCAGGAATAGGGCGGCAGCATTTCGCAAAGGTGATCAGCACGCC
ATCGGCACCTTTAATGGGCAGATGTCCGTGACTTTGGGTTGCCGGTGGAATGGAGGCGTCCCCATGTTGC
AGATTTTTCGCGACCACCACGCTCATTGCGTTACCAAGGCCGATTTCAGCCAGCAGATCGTCAAGCGTTG
CCAGCTTCATGCGGTCCAGCTCGCGCTGAATATTTTCCTGCGGGATTTCATTGAGCTTGCGGCTGCCACC
CAACGCATGGTTGAGCAGACGACGGCCCAGGCTTACAGAATCATCACGCTTGAGGTTTTTCAGCAATTGA
CGAATTTTGGCGCGCGCTTTCGAGCTAACGACAAAGTTCAGCCACGCGGCATTCGGGCGAGCGCCCGGTG
CGGTAATAATTTCAACGGTTTGACCGCTGGTAAGCGGCTGCGACAGCGGGTAAGGCTGGCGGTCGACGCG
TGCGCCCACGCAGGCATGACCGATATCGGTATGCACCGCATAAGCGAAGTCGACGGGCGTTGCACCGGCA
GGCAGTTCGACAATGCGCCCTTCTGGTGTGAAAACGTAAATCTCATCCGGGAAGAGATCGGATTTAACGC
TCTCGATAAATTCAAACGAGCTACCGGCACTCTGTTGCAGCTCCAGCAGGCTTTGCATCCAGCGCTGGGC
GCGTATTTGCGCGGTAGTGCTGGTTTCGCCGTGCTCTTTATAAGCCCAGTGCGCGGCAACACCCATCTCC
GCCATCTGATCCATATCTTCGGTACGGATCTGGACCTCAACCGGCACGCCGTGCGGGCCAATCATCGAGG
TGTGCAAAGACTGATAGCCGTTCGCTTTTGGAATGGCGATATAGTCTTTCACGCGGCCCGGACGCGGCTT
GTACAGGCTGTGCATCTGGCCCAGCACGCGATAACAGGTGTCAGAATCATTGACGATCACGCGGAAAGCG
TAGATGTCCATGATTGAGTGAAAACGCTGCTCTTTGAGCACCATTTTGCAGTAAATCGAATAAAGATGCT
TTTCGCGACCACTGACGCGGCACGGTATTCCCGCTTCCTGCAAACGCCCTTCGATTTCAGAAAGAATCTT
CTGGATCATCTCTTTACGGTTGCCGCGCGCGGCTTTCACCACTTCTTTGATTACGCGATAACGGTTGGGA
TACAGCGCCTCAAAACCCAGCTCTTCGAGTTCGGTTTTAATGTGGTGGATACCTAAACGGTGCGCCAGCG
GGCTGTAAATTTCGAGAGTTTCACGTGCGATGCGGCGACGTTTGTCCGGGCGAAGTGAGCCCAGCGTGCG
CATGTTGTGGGTACGGTCGGCAAGTTTGATGAGGATGACGCGGATATCCTGCACCATCGCCATAATCATC
TTGCGAAAGTTTTCGGCCTGCGCCTCTTTCTTATCGCGGAACTTGAGTTTATCAAGTTTCGACACCCCCT
CTACCAGCTCGGCGACGCTTTTACCAAAAAGCTGTTCCATGTCCTGGTAGGTGGCGGGAGTATCTTCAAT
CACGTCATGCAGCAGCGCCGCCATAAGCGTTTCATAGTCGAGTTTCATCTCGGCCAGAATGCAGGCAACC
GCCACCGGGTGCGTGATATAGGGTTCACCGCTTGAACGTGTTTGCCCCTCGTGAGCATCACGTGCAACGA
GATACGCCTGCCGCAGACGCTTGATTTGGTCTTCCGGCAGGTAGGTTTGAATCAGTTGATTCAGGCTTTC
AAACAGATACAAGGGCGACCCGCTTTGTGATTAACGACGACCTTCAGCAATAGCGGTAACGGCTTGTAAT
TCAGCGGCTTCCTGCTCTTGCTGTTCCTGGCGTTCGCGAACGTCGAGGATCTGGTTGTTGATCAGACCTT
CTTCGATTTCGCGCAGCGCGATTACAGTGGTTTTATCGTTTTCTTCCGGTACCAGCGGATCCTTTCCGCC
TACCTGCATCTGACGAGCGCGACGCGCGGCGACCAGTACCAGGTCAAAACGGTTACCAATTTTCTCTACA
GCGTCCTGAACAGTTACGCGTGCCATACTTAAAAAGCTCCACAGGTGAAGAAATGACTGGGCATGATACT
GAAATCAGGTTCAGTCTGCCAACAATTTGCTGATTAAAGCGTCATGACGCTGCTTTTGGCGGCTCATGCG
CAGACGTTCGGCGCGAATAATGGTCTTCAAATCGGTCAACGCGGTATCGAAGTCATCATTCACAATCAGG
TAATCATATTCGGCGTAATGGCTCATTTCTGCAACAGCTTGCGCCATACGCTTTGCAATGACCTCTTCGC
TGTCCTGACCGCGACCGCGTAGACGGCGGTCCAGTTCGATTTTAGACGGCGGTAAAATAAAGATACTCCG
CGCGTGCGGCATCTTCTGGCGAATTTGCTGCGCACCCTGCCAGTCGATATCGAGAAAAACATCGACACCG
GTCGCCAGTACTTGCTCAATGGCCTCACGCGAAGTGCCATAGTAATTACCAAAAACTTCTGCGTGTTCGA
GGAACGCATCTCTACTAATCATTTCTTTAAATTCATCATGATTAACAAAGAAATAATGTTCACCGTGGAC
TTCACCAGGACGCGGTTGGCGTGTGGTGTGTGAAACAGAAACCTGGGTGTCATACAACGGTTGGGTTTTT
AATAAAGCCTGAATTAGGCTGGATTTACCCGCGCCACTGGGGGCAGAAACAATATAAAGCGTGCCTTGAG
CCATGAGTATCTTTCGTATGTGATTAGCGAAATAAAGCCTACATACGAGCTTATTATACACGGCGCGGGC
ATGTGACGTAGCCCTTGCTCACACTTTTTGCGCAAAGTTGTTGCGTTTTGCGTAGCTACTTCCGCATTTG
CCTGTCATTCACTGCAATAAAGACGATTCTCAGGAAGCGTCCTCGCAGACTCCGTTTTTGCCACTCGGCT
TTGCTTTCATCACGTTGTATATCTGCCTGACTATCTACAGCGGAGGTGATGATGAAAGTATGGATGGCGA
TATTAATAAGTATCTTGTGCTGGCAATCATCGTCGTGGGCAGTCTGTCCGGCCTGGTCGCCAGCCCGAGC
ACAGGAAGAAATTTCCCGCCTGCAACAGCAAATAAAACAGTGGGACGATGACTACTGGAAAGAAGGGAAA
AGTGAGGTGGAAGACGGGGTTTACGATCAGTTAAGCGCCCGTCTCACGCAGTGGCAACGCTGTTTTGGTG
AAGAGACGCATCGCGACGCTATGATGCCGCCTTTAAACGGTGCGGTTATACATCCGGTTGCACATACGGG
TGTACGCAAAATGGCGGATAAAATCGCATTAAGTCTGTGGATGCGCGAACGTAGCGATCTTTGGGTGCAG
CCAAAAGTTGATGGCGTTGCGGTAACCCTGGTTTATCGGGACGGGAAACTGAACAAAGCAATCAGTCGCG
GCAATGGCCTGAAAGGCGAGGACTGGACGCAGAAAGTTCGCTTAATTTCCGCTGTGCCGCAAACCGTTAG
CGGGCCTTTAGCCAACAGTACGCTTCAGGGGGAAATATTTCTCAAACGCGAGGGGCATATCCAACAACAA
ATGGGGGGAATAAATGCCCGCGCAAAAGTTGCTGATCTGATGATGCGCCAGGACGATAGCGACACGCTGA
ATTCTCTGGGCGTTTTTGTCTGGGCATGGCCGGATGGACCGCAGTTAATGACCGATCGTTTAAAAGAGCT
GGCTACCGCTGGTTTTACTCTAACGCAGACGTATACCCGTGCGGTGAAAAATGCTGATGAAGTTGCGCGC
GTACGCAATGCGTGGTGGAAAACGAAATTACCCTTCGTCACCGATGGCGTGGTTGTGCGAGCGGCGAAAG
AACCCGAATCCCGCCATTGGCTACCAGGCCAGGCAGAATGGCTGGTGGCCTGGAAATATCAACCTGTAGC
TCAGGTTGCCGAAGTGAAGGCGATTCAGTTTGCGGTGGGTAAGAGCGGTAAAATATCGGTGGTTGCGTCA
CTCGCACCTGTCATGCTTGATGATAAAAAAGTCCAGCGGGTGAATATTGGTTCCGTCAGGCGCTGGCAGG
AGTGGAATATTGCGCCTGGTGATCAGATCCTCGTCAGCCTTGCCGGTCAGGGTATTCCTCGCATTGATGA
TGTGGTGTGGCGCGGTGCAGAACGTACAAAACCGACACCGCCAGAAAACCGCTTTAACTCGTTGACCTGC
TACTTTGCTTCTGATGTTTGTCAGGAACAGTTCATTTCACGCTTAGTCTGGCTGGGGTCAAAACAGGTTC
TTGGGCTGGATGGCATTGGTGAGGCCGGCTGGCGCTCGCTGCATCAGACTCATCGCTTTGAGCATATCTT
TTCCTGGCTTTTATTAACGCCAGAGCAATTACAGAACACGCCGGGGATCGCGAAAAGTAAAAGTGCGCAG
CTATGGCATCAGTTTAATCTGGCTCGTCAGCAGCCTTTTACTCGCTGGGTGATGGCAATGGGAATACCGC
TAACCCGGGCGGCGCTTAATGCCAGTGATGAACGGTCCTGGTCGCAACTTTTATTGAGCACGGAGCAGTT
CTGGCAGCAGCTGCCGGGGACTGGATCGGGGCGTGTCAGACAGGTTATTGAATGGAAGGAAAATGCGCAA
ATCAAGAAGCTGGGCAGTTGGCTGGCTGCCCAGCAGATCACAGGTTTTGAACCTTAGTGTCCTTCGTGGC
TGTAGTAAAAGACCGGTAATCCCAGCTTAAGGCGTAGCGCCAGTAAGCGGGCAAAAAAGCCGAATACCAG
GGTGGAGATAATTACCACATCATGGTTAGAAACATAGTGTTGCAGCGCGATGTACAGCACGGCGGAGGCA
AATGAGACACCGGCATACAACTCTTTCTGGAATACCAGCGGGATGCGTTTACAGAACATATCGCGCAAAA
CGCCGCCAAATACGCCGGTCGTCACAGCTGCGACAACGGCAATGATCGGGCCGTGTCCCATATCCAGTGC
AACCTGTGCGCCAATGATAGAAAAGACCACCAGTCCGAGCGCATCGAGCACCAGAAACACTTTGCGCAGG
TAAGGCATTACAGGAGCAACGATAGTGGTGAGTACTGCGGCGGTAGCGACAATAATTACATATTCCGGGT
GTTTGACCCAGCCGAGCGGATAGTGGCCCAGCAGAATATCGCGCACTGACCCTCCGCCAATTGCCGTGGC
GGTCGCAATAATAATTACGCCAAATGTATCCATGCGCCGTCGTCCGGCCGCCAGCGCCCCCGTCATGGCT
TCGGCAGTAATGCCAACCAAATACAAAATGTGTAACAGCATGGTTCTCTCCCTAAAAATCTGTCTGGCAG
GGTAGCGATTTGTGCGTATTGTCACGATTGAGATTTTTTAAGGTGAGAGGAAATTGATAACTTGTAGTTA
TGTGAAATCGCTATTTTCTGTAGCGTAGATGCATTCTTCTGACTTCTTGTCTGAGAGAATGCATAAGAAA
AAATAGGTTAAAATTGAGGGGTGGAAAAGAAAGGTGCAATGTTTAGCCATTGTGTTCACCGCACCTGGAC
TTTGGCTTACGCATCGGGTATCTCAATCAACAAAAAGAGTTTTTAGTTTCTGCTATTTCTTCTCTGTAAT
TTTTACACTGTTTTCCAACTGCTTGATGTTGACCTGCGGGGTCGGCAACTCCTCAGGCATGGTTCCGCCA
AGTTCCTGAATGGTTTGCCTCACCTTGCGACCCACGTCAAAGTGTGTGGTGTTAGCTTGCTGTTTTGAAT
TCACGCCATCCCGCTTGAGTTTTTCTTCTGTTTGGGTAGCTCGAAAGAGATTAGCCGCCAGTTCTGTTGA
ACCCATATGATCCAGGATCTTCTGACTCTTTTTCAGCCCCTTCCGCTGATGGATGGCTTTCTGATCTAAT
CCACCATACAGCCCCCGGTAACCATGATTCTGAAATATGGCGAAATCGATAGCTGTCGCTACCCCAGCTT
GCTGCGCTGCCTCAACTAATTGTTTGTTATGTTCTTTCAACTCATTTCTCAGAAAAAGACGCTTTTCGTC
TTCACGAAGTTGCCTGAAAGCTTCATCGTCAGCCAGCTCCTGCCGTCGGGTCTGGATAGCAAAATAAGTT
TGCCCTGCCGCAATAACCGGTTTCGCAGGGTCGCCGTTTTGTACTACCAGGTAACAGGCATAGCGGGAGA
GTACGATGTCTTTTAATGCTCTTTTGGCATTTGAGCCAATTTTGATCATATCGAGGATCTCCTCGAAATG
GTCATCAATTGTGTGACCACTATTCAGACAAGCTTCTTTGGCGCGCGTTAATACAGGTATAAAGTGACGA
TACTCTGAATAACCCAGTAGTTTCCCAAGTTGTCTTGCTGACCATTGTTCTGCTCCGTTTGCATTAATCA
GCTTTATCTCTTCAAAAGGTTGATGATGTTCGTTCATTGCCCACTCCATGTGATATCGATTGCAAGGAAA
GTAAGTCTACAACTGTGTTTATATACAGTTGTGAGTATCTCACGTTCTCACTGCGCTGGGCAAAAAAACA
TCGCAAAATCTGGAGCAGGCACGCAAAACAGAATTGAAGTTGCGGGGAAGAAAAATGCCGCTCTGTTTGA
GTGGGCGGCATTTGTGAAGGCTGAAAAGTAAGAATTGGCGTTACGAGTTGAATCTGAATGTTGAGTAGTG
TAACCAATCGCTGCTATTGCTGAGTTTTTATTTTCTATTTTTTCTATTGGGTACAGTCTTGGGTACAAGA
CAAAGAGGAGTGCTTGAAAATTGCTCATGCAGTTTGAACTGCTCCCCAACAAAATTTTTTCAGCACTCTA
CGTTTTGCTACGCGTTTCTGTTTTCAAGGATTGCAATTCAACTGCAAATATTAAAATATTTCGCGCTATA
GGTGTGAAGTGTTCACCCCGTCCATCTGTTCACTTATTGCGGGTAGTGTACTGATATTAAAGAAAATTAT
TAGAGTGAACAGCTTTGTTAAGGTATGCGCACCTGTTCACCCTTTCAGACTAATAAATAGACAAAAACCC
CGATTTACGGGGTTCTTGGTGATTTTTTACAAGTTACTGCAATGTGTCGGGCACAGCTGAGAGTTCGTCT
TCTCCCAGCCATTCTTGTGCCCTGTCAGACAAATTGACGTTATATCTTTTGCCCTTTTTACTCTTTTTAC
TGTCCAGAGTAATACCAAAGGCTTTGAGCGTGTCCCGTAAATCTCCGCTGAACTTCGGTAGGGTGGGGGT
TCTCTGATAACCGTAGGCTTCCAGATAGGCCAGATAAGCATGATAGAGGTAGATGCGTGGCTCTCGCGCC
ATGCGCCCATCGCCCATGTACATGCCCTCGGGATTCGGCAAACCTAGCAGGTAAGAGCAAAAGCCATACA
TCGGGTCGTTATCGTTCTTCACCTGCAGCGCTTCCGCTGAATCACGCTGCGCGATAAGTAGCGATTTGGC
TTTGCCTGGCTGTTCGAAGTCAATCAGCAGACCACGGACGATTACCGGCAGTTCGGCTTTAATTTTATCG
AGCAGATGGGGATCACGTTCCGCCTCCGGCACTTCATGGTTAAACGGGAAAATAACCCGGCGCCGCGATA
TCCCGCCTTGTCGTTCGGTGAAACGCATAGGTTCGTTGTTTGTTGCGATGACAACGGCGCGAATAACCGT
ATGGAATGGCTTTTCGTGCTTTGGGTCGATCCTTACCACGTCGCCGCCCGTTATAGCCTTGATACCCGGC
CCGGAACCCGTATATGTTGCTTGGTCGGGTAGGGTGATCAGGCTTTTGCCGACAAAAGATGCGCGTTCGC
GCGCGGTGTCCATGTCCTCCATTGTGCCGCTGGTGGCGTGTAGTTCGCCCGTCAGCATACGTGCAATACC
CGTGAACACGCTTTTACCACTGCCACCAGCACCGGTAACCTCGATGAACAGTTGCCAGTCGTAGCGGTTT
GCCAGCACCATATACAGAGCGGCTTTGATTCTCTCCATTTTGTCGAAGTCGCCCCCTGCGGAATGATGCA
GCCAGCGCCAGAAGTTTGGGGCATTGTTTTTCAGGGTTTCGCCTTTAACCGGCTGCGTGTATTCAACGCC
GTTATGGCTGGTCAGCCAATCGTCTGGGCAGTGGGGGCGGAATCGCTGCGCCTCGAGATCATAAACGCCG
TTGGCAAAGCCAATCAGGTTACGAGGAGTTTCTCCCATTAAAGGCAGAAGCATTCCCATAGCCTCAATCG
CGCTTTTAACCTCGTACGGTGTAAAGGGGACCCCGTTATCTTTGAAAATCTGCGAAAGCTGGCGGCGCAA
CTCGGCATCGGCGATGTGCTCCCACACCTGCCCGGTATAGTGATAAACCATGTTGCCATCAGCTTTCAGG
CATACGTTGCCGTAATATTGCGCCAGCAGTTCACCGCGTGTGCTGGGGGCCATTTTCTCAATGTACGCGG
CCTTTGCTCGCCATTTGCCCGGATTATTCCACCCCTGCGCCTGAGCATCAGTAAAAATAGCTTTATAGCT
GGTTTTGTCAGGGGCGAGACCATTCCAGCGTTGTGCCGCGACTTCATCAAGTTCTTCATCAGGCCAGCCA
TCCGCTGCGGTCAATGACCACTCGACCCACAGTTGCCGCGCGTCGTCCTCAAAATCGGTGCCTTTGAGAG
ATGCAAGGCGGTAGCCCTGCTCAATCCACGCCCCATTGTCCCATGCCTTTTGCAGCATGGAGGGAAACCA
GAGTGCGCTGCGCAGGTCGGCGATAAGGAAGTTATCCGGTCCGGCGCTCAGATCGTCAAAATCAGCATCT
ATTACCGCCGCGGCGTCACGCTGGCGCTGTTTCTTTGCCTTGCTTTTGGCCGCCTTCGCTGGTGGCTGGG
CGGGTTCCGGTAACGCCCCTACGTCGATTACCGCGCCCGCGTAATTCTGGGCTTTCGCTCCAGTGTGTGG
ACAGTAGCAATAGCTTTGAGCGCCGTATACATTGCGGTCAAAGACAACATAATCGCTGCCGTTCTCCCAG
CGTGCTTTCTTATCCGCCAGGCTGGCGAATGAGAATCCAGCCTCCTGCATCAACAAAGTTTCTATGGATT
CGCCTGTCGCTCGGCGGTAGTCAGATTCAACCGCTCGGGAAAGCTCGCACACAATACGCAGACGAGGTTC
ATCCGTCGTATAGCTGGCCGTCTGGTACACCAGCATTGAGTATCGCCGGAACACCTGTACAAGTGCTGTG
ATTGCACCGGGAGTGCTGCCGTCAATGTCCAGCATACCGAAAGCACACGGTGCCATGTTTTCGGGTTTAC
GTCGCTGCCCGTCCTGCTGGGTAGTTGCCGAGAACCAGTACAGTTTCTGCTTTTCTTTGCGCCGTTCTTC
ATCCGTCATTTCCTGTGTGATGGAAATTTGCACACGATGCGATAGAATAGCGTTGCACAGGTCAGAAAAG
CTATTTGCAGTAAAACGAGCAGGGGTGCGTTTCTGCCCCTGCTCCATCAGGTGATCGAATCCACTCATTT
CTGACCTCCTTTCAGATCACACATTCTTTTTGCCTGGATGCCGTGGAGCTTGCGTAGCATACGGCGGGTA
TGGCGGTTTGTAGCGTAGGTTCCGTTCGGCTCGTACGGCATGAATGTAGGGCGATTATCTGCGATCTGGA
TATCGTCGCGCCCTATACCTTTCTGGCGTTCCATTAATTTGATCAGGTTGCTTGATGAGCGATGTTTGCG
TGGCATTATTTGCCTCCCTCTTTGCCGTCAGCCAGTGAGTCCAGATGTCCTGCCATGAATTCGGCAGCGC
GCGCCATATCAGCGGTATGTTTCAGGAATGCGCCCAGCGCTGGCAGGTCAGCTTGATGGTCGGTGTAGTT
GGGGTTATCACATGCCCAGAAGATCAGATTGCCGATGGCGCTTACACCGCGCAGGTAGTTGTTGCGAGCC
TCGTCCCCCACAGCGGCCAGCAGACGCAGATCGTCCGGCGCTGTCTCAGCTGCGCCACCGTTCAGCGGCA
GCGTGAAAAGATTCCATGTATTGAGATTAAGCATTGTCCACCTCCGGGGTGTTACGTTGCGCAGCTGAGG
CACGCGCGGCTGTTTCAAGTGCCCAGGCGATCAGCTCATGGGCTAAATCGGTATTCTCCGGGTCAAGCGC
GATAAACTGCGCAGCCTCGAGTGCAACGGCGATCGGACGGAGTGCGTCCTTTGGGTTCAGGTAGGCGTCA
TACATGGCGCACCTCCACTACTTCCGCCGCGTGGGTCACAATTCTGCTCACTCCATCATCCAGATAGCTG
GTATGGGTTAACTGCTGCGCCGCTTTCTCTGCGAGCTCACGATTATTGAAACGTTCCGGAATAGCAAAAC
GACGGATCGTTCCCGAAAAGTGATAGGTGACCGTGACAATGACATTAAACATGGCTCACCTCCTGAACTG
GCAAAACGGCGGACAGTGACAGGATGTAGTGAGGTGCCAACACCTTACGTGCTTCATGCTCGCTGGTGGC
CTCAACAATGATTTTGCAGGGTTTTGCCTGGCGGTCAGCGCGATCGAGCGCCATAAAACGATACTGATAT
TTGGGGTGAGTTTGGGTACACTGCGGCTTAGCCATAGCGTTAGTCTCCGTAACGTTGTTGGTTAGACGCC
CCGTATGTGTTGCGAGCACTACGGGGCGTTGTCTTTTCTGACCTTAACATGTTAAGGTGCGTACCTATTG
ATTTGAATCTTAGTTTAATAGGTACATACATGTCAACAGTAATACAGCGTGATAAACAGCCCAAAGGCAG
GGGAAAGGCACCAGCTTTCCAAGTGAGGATCGCCCCAGAATTGAAAGAGCAATTCGAGGCCGCCGCACGA
GATGCAGGTATGAGTTTAGCTAATTGGATGAAAACCTTGGGGCGCAAAGAACTCCAGCGGCTGGGTATTG
AGCCGAAAGCCTGACCCGCCAACAATGGAGATCGAACGGCTGTCGTGCAGGGTGTGCTCACGGTCGCGTT
AAGCATTCTCACCCCCGGTTTTTTGCTTGTTCCATTGGCGAATAGCTGCGGCGTCAAAGACGGTCACGCC
GTCGGTTAACTGGTGGGGTTTTGGAAAATCAGGACGTTTTGCATAGCGCCATACGGTGCTGATATGCACT
CCAAGATAGTGCGCCACTTGTTTGGCTCGTGCGTTGCCATTGGTAGGAAAGGTGAAAGTTTGCGATTTCA
TGCGATTACCTGCTATTGAGTGAGAAGGTAATCGCAAGGCTACGGGGTAGGTGGTTACGGGTGGGGGAGT
TATTGAAAACTCATCGGAGTTATGAAAACTCAGCTACCGAACCCCTCCCTTCTTCAGCCAGTCAGTAAGG
GTATTATCATCGATTTCAGGATCACCGATTGAAGGGATCCGGTTAGATATCTTAATTCTCAGGTCCCTAA
TGCTCCCCTTAAAATCATCGTCAGTCAGGTTATACGATCTGAGTAATGCGACGATAAAGCGGCATTGCTT
AGCGGTGATACGCTCAGGCGTTGGCTTTTTTTCATAAGGCTGACCGATCAAAAAGCGCCAAACCTTTTGC
AATTCGACACCTGGTATTCGTAAATTTTCCCGGCCATAAGTATTCCTTAACGCTTCGCAAAGCCCTTCCC
CGTTATCATGGTGAGTGTTGTAGTGCGGTTCTGTTGGTATCCATAGGGACTGCTCATGGAATTCACTATC
TGAGCCATATTCTTTCACAGAAAAGTTAGCATTTAAGTTCGGTGGGTAATCAACATTTAGCCAGAAAAGG
TTGAAGCTAATCGGATCCACGGATAACAAAATGCTGTGACCATGCCCGGGAAAATTAACATCTTCACAAG
CAATGTAGTCCGGCAGAGAAAAACACAACTCGATAACGCCTTGGTTCCATAGTTCCAATAAATCGTTACC
GGTACAATTTGCCCCCTTATCAGTCAGCATCTCCGCTGCCCGGACAAGATCATAGCTTGGTAGAGGGGAA
TAAAAATCACTCATTCGCGTTAGCCTTACACACGTACTTGCCTGGATGATTGCTGAGGCAGGCGGTCAGG
CGTAGATCGCTTTTCTCCCTGTCGGAATAGCCTCAAGTTCATTGTGTTAGATAGAGAAATTCCAGTAAGC
CAAAAAATACGGGCAGGGGGAATAGCGAAAATGCCAATTTTGCCTTATACCTTGCGGCATAGGTCCCTGT
CGGCGCTGACGATGGGGCAGCAGTGGGTATAAGTTTCCCCCGTCGTAATGACCAAATATGGTACCGGAAA
TGGACGTTTTACTTTGATATTACGTTGATCTGGAATCTATAAGGTTGCTGGTAGCCAGATGATTTTTCTC
CCGGCAAGGACACCTTGTGCCATTGCTTTTTTCTAGGACTTCAAGAGTCTGTGAAAGGTTAGTGGCCCAA
ATCCTGTCATGATAGTGCTTTTTATATAATTCTTGCTGACAAAGGAAAAAATAATTGATTGCGTTATGGA
CACACGAAAAAATACTGATATAAAATCACGGCTATCAGTGACAGTGATAGGAAATGGTCGTGAAAAAATC
CAAAGTGGCAGATCTCATCGTTCAGAATGTTTCAAAACAACTCTTCATGGCCCTTTCTGACGCGATTTAC
GCGGCATCAAAGCGTTCTTACGATTATGCTCAAAAGAAGAAGCTAGATCACAGATCGACCGCGCTTGGTT
ATGATCGTCATTTAAACCTGAATGAAACTATTTATGAGGTGTTTGAGGCCAACGGTTGTAATCCTGGAAA
GCTGCGTGGTAACCGTATTGTAGAAGGCCATAGTGGTATATTCACGATTGTTCGTGAAAGCTACAATGAT
AACCAGTGGAAGAGATTATTCCGTAGCAAACGTAAGCAAGAACTCATTTCTGAGAACGTGTTTGTGGAAA
AAATGGTGCAACCGGATTTATTCTCCGATGGTTCTGATGTGCCAAAAGCTACACTGTTCGTAGTATGCCG
TTTTTCCGGTTCGTTGCAGATTCAGCCTGAAGCTCCGATGTCTATAGAGCTTGTTGTACCAAGTTCTGAT
GGGAAGCGCTGGGTTTTTCATGAGCCACTTGAACTTTTTTTAACCCGATATGATGTAGTTCCGTCCCAAG
AAGATAATGCATTCCCTGGGCTCAAAAGGGGCATTATCAGAAAAGATGGAACCGAGGAAGATAATGTATG
AGCCGAGGCGTCGCCGAATTTCAACCGGGCAGGTTAGCACAGGTACTAGCCGCCCGGCGGCTATCACAAA
CTCAATTAGCTACTATGGTGGGTGTATCACCAGCAACCATTAGCAAATGGCGTTCCGGTCAACAGGCTCC
AGAGTCTGAGGCTTTAGAACGTCTGGCCACTGTCGTAAATGTTACACCTGAATGGTTTACGCGCCCTCTG
TTGAAGGGGATGTCAAAGCCTCTGTTCAGAAGCAATGCATCAGCTCATGTAGCTGCACGAGCAATGTTAG
AAACTCGAATCCATTGGGCTAATGAGTTAGTTACTAAGCTGACTGAGTTTGTAGATCTGCCGGAGCTAAA
ACTACCGCGTCGTAGCTTTACAAACATTGATGAAATTAGTGATGCAGATATTGAAGACGCTGCTAATGAG
TGCCGTGCTCTTTGGAATCTTGGTACAAAGGAAATACCGGATCTTGCTTTAGCCGCAGAGAGTAATGGTA
TTATCGTTATTAGAGAAGAAACAGGCGTTGCGCAGATTGAAGGGCTTTCTGCCTGGAGTGAGACTTTAGG
TGTTCCTTTTGTTCTCCTCTCTTCAGATAAAGGTAATGCTTTTCGTAGCAGATTTGACCTTGCTCACGAA
ATTGGTCATCTGATCCTTCACCGCTATGTTGGCAACGAACTCGAAGCCGAACGTTATAAGCTGAAGGAAA
GTCAGGCTCATAAATTTGCGGGAGCACTGCTGCTTCCTGCTGAGACATTTGCCGAAGAAATTAGGACCCC
GGTAACATTAGATAGCTTGCTTTTAATTAAACAACGCTATGGTATTTCCGTTGCGGCAAGTATCATGCGT
TTACATGTGCTGCATATTATTACGGAAGAAGAGAAACAAAATCTTTATAAGCGTCGTTCAGCACGTTGGG
GAGCGAAATCAGAGCCGGGAGATGATTATCGTGAGCCTGAAAAACCACGTTTGTTGAAACGTACTATTGA
ATTGCTGGCATCGTCTGGAATCATTTCAGTTGAACGGCTTGCTGCATTCGCAGGTTTATCTGCTATTGAT
GTGGAAATGATTGCTGGTTTGCCCGAGGGGTACCTGACTGGCAAGAAGGCTGCTGTTGTGCATCTGGCAA
AATTAAAATCTATGTTGGTTGAGCATCGTGATGTGCAGGCTAACGATCATAAAGGGGCTTTAGTGCAATT
TACGCGATCGCCTAAGCGCTCTAATTCTTAAATGTTCACATAGCCATGCGTGTTAAATGCATGGCTACTT
TACTGTCTTCAAGTTGCTAATTCATTCGGAGGCAGGGACGAGTACGGGAGATGAGCAAATGTACTGCTCA
AGTCAGATACCAAAAATGGCGTTGCCCGGTCAATGACGTTGAGGCCGATTAGCGAGCTAACATCGCGGCC
ATTAACAATGTTATCCCGCTCAAGCAAATGCGCTATTTTTCCTACTTCCGGCCAGTATTGAGTCATGAGG
AATTTGGTCTTTTCAACAAGTTTAGAAAGCATTAACTTCCTGTTAATTCGCTTATCCGTGGCACATATTA
AATCGAGCATGTCATTTACGTTAGCCATGTCATAGCGGTGAGGGAGTGAATACTTTATATTGAAAATTTC
GTTATTTTCGTAAATGGCTTCGCTTACTGGTCCAGCGAGGGCTACAAAAGCGGCCTTTGTTGCATCGCGC
TTTATACCTTCCGCGTAGTAGCGTATGAAAGGGATAACTTTGCCATCGTGCCCAACTACACCAGATTTAC
TCTCCCGCAAACGCCTGAGATCGTGGCTGTGGATTATGCCGTGTTTAACAACGCCCAAACACTGGGCTTC
ATGTACATGTTCGCCAGCAACGTAGCCGGATTCATCCATAATGGCGATAACCTGCATATCTAAGCGAATA
AGCCATGCGGCTACTGCATGGCCCGCTTCGTGGAATGCTACACATCGTTTACCATCGCCTATCCAGTTAT
AGAACATTTCCTGCTCATATATCTGGTGAATGGCGCCCATTACGCGCCCTCGCTTGCCAGTGAGGCCAGA
GCCTTAGCCATGAGGCCGCGGGCAATCTGGTGAACGGTGGGAGCGACGCCGAGATTGGAGCGCTGGCGTT
CACGTTCCTGAATGTTGCGTATGGCCTGCATCTGCTCGGCGGACAGCAGGACCGGCTTAACGTTTGGCTT
TCTCATTCTGTTCACTCCAGAACCGTGCATTTGATTCGTTGAGTTGCTGCAGGTTGCGACTCTGGCGATC
GAAGTTATTGCGTGCCTTTGCCGTTTCAAGATCCTGACGGGTCAGCATTGGGCGGTGGGCGCGCTGTGGG
TTGCCTGCGGCTAATTTCGGGTCATAGATAGACATGCTTCATATCTCTTTAGTGTTTTTTGCCCCAGAAG
GTGGCGTTGTCAGCATTGATGCTGCGGATTGCGTCTCCTGTAGAAATTATTTTCGGAGCGATATTGTTTG
CTTTCATGTAGTCGCCAACCTGCTCGAGTATATCGATAGCCTGATCCAGCTGGATTTCTGACATTGGGGT
AGGGTGTACGGCGCTGAACGCCTCAGCAGGGGCGTAGCGCAGCACATCGAGCGCAACGATGCGCGGGTCG
GCGTCGGGCAGTGCTGAATCGTATTTCGGCGCTACGGCACGTACCAGACGCATGAACTCAGCATTCATTG
CTGTCGGTGCCGTGGAAGTAGCAGACGTGCCATTCAAACCGCGGGAAATCATATCACTGTCGCGGGTGTA
CATGCGGCGCAGGCGGTCGCCGGTGGCGATGCGCATTTTGCGTTCTTTCTCGAGTGTCGTTGCAAGACTT
GCAATGATGGTCGCAACGGTTCCGCTGCACTGGAACTCCTCTTTACTGCCGTCGGCATACGTCACCACGC
CATCTTCGCCAGTCACTGCGATGTTTGTAATATCTTGCATCGGTCAGACCTCAGTATGTTCTATCGGATA
TTTATGTTTCATTATATGCAATGATGATATTCGTTGTTGCAATTATTACAATGTGTTTTTCTTGTGATAA
CATGCAAATTGAGGTCAGAACTCAATGAGTTGATTCCAAACATGGTTATCGGTACCCAAAAGCCCGTGCG
TCTCCAGCGCGGGCTTTTTCTTTTTGGGGACGGGTGCGAGCTAGTGGCATAAAGCAGATTTTCTCTACTT
TTGAAATCAATAAGTTAGGTTGTTTTGTAGGGTGAGTGCTGGCGTCATCGTACAGATCTGTACGATGATG
ATTTTTGTAGTTTTTTTTAACGCTGGTGGCTGGCGTGTTTTCGGGCAAGGGGAGCAGCCACAGCAGCTTT
AGAAGGTGAACAGGTGAATACTAAGGTGATTAGTTTTACTGTAAGTATTCACCCTTTTTTATTATTTAAA
ATCATGAAGTTAATTAAAAAGGTGAATAGGGTGAATACCTTCAAACAAAACTTTTATATTTTAGATAAAG
GAATAACATTGTAGTTTTCCCCTCGTTCAAGCGAAACCAGAAGCCCCGCCCACAGTTCCAGGGCTGCCCG
TCGTTCTTCAAAGTACTGGTGGCGGTTGTAGATACCCTCAACGCCTTTAATGCGGTGATTCAGGCAACGT
TCTGCGACTACGGGATCGACACCCAACGCCGCTAAATGGGTGCGGGCGGTACGCCTGAAATCGTGAATTG
TGAAGTTTGGTACTTCTGGCATTTCGCGGCGTACTTTTGCCAGCGCCACTGGGAGTGTGCTTTCCTGAAT
GTGGGGAATCATGCGGTGTTGCATCTTCCGCGCGGGGAGAACCCATTTACTCCCACTGCCCGCGATAGTG
CGAAGCTCTCTCAACCAACCAACCGCAGGTGGAGGTAGTGGTATATCAATAGCGTCGCCGTTTTTAACGC
GTTCTGCTGGTAGATGCCACACTGCTTCATCAAGGTCGAATTCATCCCACTGAGCACCGCACAGCTCCAT
TTTGCGACAACACAGGCAGAGGATTAGCTTCATGGTCAGCTCGTTCTCGCGGCTGAATCCTTTTGCAGTG
CGCATAGCTTGGAAAAAACGTATAAGTTCTTCACGGGTCAGCCAGCGCATACGGCTACTTTCCTGCCCGC
CAGCGTCTGACAGATCAAATGCTCCAGCTGGGTTTAATTCCAGTGCATGACGCTTGATAGCATAATCGAA
TATGCGTTTAGTCCAGCGCAGAACGTCATTAGCTACGGTTGGAGCGCCACGATCAACAACGCTCTGTAGC
ATCGCATCAATATGACGGGGTTTTACGTCCTCTATCTTCATGTTGCCAATATGTGGGTTGATATCCTTAT
CGATTCTCCGGCGCAGAAGATCGGGATGTTTCCAGCGTCCCAAAATCTGCCGTTCGAAATACTCGGTTGC
TAGCTCTGACACGCGAAGCGCGTTTTTCTCCCGCTCCATCTTTTCTATAGCAGCCGCTTTTCGCGCTTTC
TTTTCCCCGGCGACATCGAAGCCCAGGGCTACACGTGCGGATAATTCCTTGGCTATTTCCCGTGCTTTGG
AAAGGGATATTTCGCTATAAGATCCAATAAGCATTACCCGTGATTTCCCAGCGAACTGATATCGAAAACG
CCATACAGGCACTTTATCCCCCACTCGATAGCGAAGGTATAGCCCGTTGCCGTCAGAGCGCCCCTCGAAG
CGTTCTCCTGCCTTAATCCATGACTTGATTTGGATATCTGTCAGCTTTGCCATAGTTTCACCTGAATATT
GACTATCATTTTGTACCCAAAATGAATTGGATAAATTATTAAAGGTACAGTCTTGGGTACAAATGTTTTG
CGCGATGCTATGCAATCATATGCGACAGTATGAAAATAAAAAAGCCCGCAAAATGCGGGCTATGATGGAT
TTTTGCAATTTCATGCGACAGCATGCAAAATCATTCAATATTCTGAATCTGCTCGCGCATCTGCTCGATC
AACACTTTCAGCTCAATGGCGGAGTTAGTCACTTCGGCATTGATAGACTTCGAGGCCAGGGTGTTCGACT
CGCGGTTGAACTCCTGCATCATAAAGTCCAGACGACGACCAACGGCTTCTTTTTTCTTCAGAATGTTGTA
GGTCTCTTTAACATGCGCTTCGAGGCGGTCCAACTCTTCGGCAACGTCAATTCGTTGTGCCAGCAGAACC
AACTCCTGCTCCAGACGGTTGTTTTCCAGTTGCACCTGGGCGTCTTCCAGCTTAGCCACCAGACGCTCAC
GCTGCCATTGCAGGATTTCCGGCATGTGGGCGCGGACTTTGACCACTTCGGCGGTCACGCCTTCCAGACG
CTGCTCGATCAATGCTTTCAGCGCCTGACCTTCGGTTTCGCGCGCGATGATAAAGTCGTCCAGCGTACCA
TCCAGCGCCGCGAGAATTTCAGCGGCAATCGCGTCGAGATCCTGTTCCTGGGCCGCCATCACGCCTGGCC
AGCGGAGAATATCAACCGGGTTGATTTCCCCTTCGTCACTCTGCATTTTTACCCAGTTCGCGGCAGTTAC
CAGCTGTTTAGCCAGTTTTTCGTTGAGGATCAGCTCACCTTGCGCGCTGACATCGGGCTCATAGCGCAGG
GTACATTCCACTTTACCGCGCGTCAGGCGAGAACGAATACGCTCACGAACGACAGGTTCAAGGCTACGGA
ACTGCTCCGGCAGACGAAAGTAAGTTTCCAGATAACGCTGGTTTACCGAGCGCATTTCCCAGGTTGCGCT
CCCCCATTCACCCTTGATTTCACGCCGGGCGTAGGCGGTCATACTGCGGATCATAGACGTTCCTGTTTAT
AAAAGGAGAGGTGGAAGGATTATAGCCATCGATGCCTTGTCAGGATAGGAATAACCGCCGGAAGTCCGTA
TAATGCGCAGCCACATTTGTTTCAAGCCGGAGATTTCAATATGCGTCCAGCAGGCCGTAGCAATAATCAG
GTGCGTCCCGTTACCCTGACTCGTAACTATACAAAACATGCAGAAGGCTCGGTGCTGGTCGAATTTGGCG
ATACCAAAGTGTTGTGTACCGCCTCTATTGAAGAAGGCGTGCCGCGCTTCCTGAAAGGTCAGGGCCAGGG
CTGGATCACCGCAGAATACGGTATGCTGCCGCGTTCTACTCATACCCGTAATGCCCGTGAAGCGGCGAAA
GGTAAGCAGGGGGGACGCACAATGGAAATCCAGCGTCTGATCGCCCGTGCTCTTCGCGCGGCAGTAGATT
TGAAAGCGCTGGGTGAGTTCACCATTACGCTGGACTGCGACGTGCTTCAGGCTGATGGTGGCACGCGTAC
CGCTTCGATTACCGGTGCTTGTGTTGCACTGGCCGATGCCCTGAATAAACTGGTTGAAAATGGCAAGCTG
AAAACCAACCCGATGAAAGGGATGGTAGCCGCGGTTTCTGTTGGTATTGTGAACGGCGAAGCGGTTTGCG
ATCTGGAATACGTTGAAGACTCTGCCGCTGAAACGGACATGAACGTGGTGATGACCGAAGACGGGCGCAT
CATTGAAGTTCAGGGAACGGCAGAAGGCGAGCCGTTTACCCATGAAGAGCTACTCACCTTGTTGGCGCTG
GCCCGAGGGGGAATCGAATCCATTGTAGCGACGCAGAAGGCGGCGCTGGCAAACTGATTTTTAAGGCGAC
TGATGAGTCGCCTTTTTTTTGTCTGTAGAAAAGTAAGATGAGGAGCGAAGGCATGAAACCATATCAGCGC
CAGTTTATTGAATTTGCGCTTAGCAAGCAGGTGTTAAAGTTTGGCGAGTTTACGCTGAAGTCCGGGCGCA
AAAGCCCCTATTTCTTCAACGCCGGGCTGTTTAATACCGGGCGCGATCTGGCACTGTTAGGCCGTTTTTA
CGCTGAAGCGTTAGTGGATTCCGGCATTGAGTTCGATCTGCTGTTTGGCCCTGCTTACAAAGGGATCCCA
ATTGCCACTACTACCGCTGTAGCGCTGGCGGAGCATCATGACCTGGACCTGCCGTACTGCTTTAACCGCA
AAGAAGCAAAAGATCACGGTGAAGGCGGCAATCTGGTCGGTAGCGCATTACAAGGACGCGTAATGCTGGT
GGATGATGTGATCACCGCCGGAACGGCGATTCGCGAGTCGATGGAAATTATTCAGGCCAATGGCGCGACG
CTTGCTGGCGTATTGATTTCGCTCGATCGTCAGGAGCGCGGGCGCGGCGAGATTTCGGCGATTCAGGAAG
TTGAGCGTGATTACAACTGCAAAGTGATCTCTATCATCACCCTGAAAGACCTGATTGCTTACCTTGAAGA
GAAGCCGGAAATGGCGGAACATCTGGCGGCGGTTAAGGCCTATCGCGAAGAGTTCGGCGTTTAAAAATAT
GCGCTGCGCAGGTTTTTACTGTGCGCAGCGTGATGCGGTTTAAGATATCGTGTTAATCTGCTTTCGCCAG
CAGTGGCAATAGCGTTTCCGGCCTTTTGTGCCGGGAGGGTCGGCGAGTCGCCGACTTAACGCCAGTAGTT
TGTCCAGATACCCAAAGTCGCTCCATTGTACTTAAGTACGCTTCGCGTACGTCGCGCTGACGCGCTCAGT
ACAGTTACGCGCCTTCGGGATAGTTTGAGGGTATTGCCGCTGTTGGTGCCTCTTTTGGTCGCCGTGATGT
GGAGAGTGGAATGGATGCTACCCGGATAACCCTTCTGGCGCTTGATTTGTTCGGCTCGCCGGGCTGGAGC
GCCGATAAAGAAATACAGCGGCTGTATGCGCTCAGTAATCATGCCGCACGCCATTACCGACGGATTATTC
TTTCTAAGCGTCACGGCGGTCAGCGGGTGGTGTTAGCCCCTAATTACTTGCTCAAAACCGTACAGCGCAA
CATTCTTAAGAACGTCCTTTCACAATTCCCTCTTTCCCCTTTTGCTACCGCCTACCGGCCGGGTTGCCCA
ATCGTCAGCAATGCGCAGCCTCACTGCCAACAGCCGCAGATCCTGAAACTCGATATCGAAAACTTTTTCG
ATAGCATTAGCTGGTTACAGGTCTGGCGTGTGTTTCGCCAGGCCCAGTTGCCACGCAATGTGGTAAGCAT
GCTGACCTGGCTTTGTTGCTATAACGACGCGTTACCGCAGGGGGCACCAACTTCGCCTGCCATTTCCAAT
CTTGTGATGTGCCGTTTTGATGAGCGCATAGGGGAATGGTGTCAGGCTCGGGGAATTACCTACACCCGCT
ACTGCGATGACATGACCTTTTCCGGTCACTTCAATGCCCGCCTGGTTAAAAATAAAGTGTGCGGATTGTT
AGCGGAGCTGGGCCTGAACCTCAATCAACGCAAAAGCTGCCTGGTCGCGGCCTGTAAGCGCCAGCAAGTA
ACCGGGATTGTTGTTAATCACAAACCACAACTCGCCCGCGAAGTGCGGAGGGCACTGCGTCAGGAAGTAC
ATTTGTGCCAAAAATATGGCGTCATTTCGCATCTTAGTCGTCGTGGTGAGCTTGATTCTTCTGGCGATCT
TCATGCACAGGCAACGGCGTATCTTTATGCTTTGCAGGGAAGAATAAACTGGTTATTGCAAATCAATCCT
GAGGATGAGGGTTTTAAACAGGCGAGGGAGGGTGTAAAGCGAATGCTGGTGGTATGGTAAGAAAAGCGTC
AGGCAGACGTTTCTGCCTGAACGTTTGGGAGAATTACTGCAACTGTGCGGCAATTAGCGGCCAGCGGGCG
TCAAAATCATCCGTCGGGCGGTATTTAAACTCGCTGCGGACAAATCGTGACAGCATACCTTCACAAAATG
CCAGCAACTGGCTTGCCAGCAGGGTTTCATCGGTGGTGTAACCTTCACCCTCACGCATTCTCTTTTCACG
CAATACCTGACGCAACTGCGCTTCAATACGCTCGAACAGCTGGTTGATGCGCCCTTGCAGACGATCCTGT
TCGAACATTAGCGCATGACCAGTGAGGATGCGAGTCAGGCCAGGATTACGCTCACCAAAACCGAGGAGCA
ACAACACGATCAGACGCAGGCGCGCTGTGGTGTCCTTCTCATCTTTCAGAATCAGATTGATGCGAGTAAT
CAGGCTATCTTCGATAAACTCAATCAGGCTATCGAACATGCGGGTCTTACTGGGGAAGTGGCGATACAGT
GCCGCTTCGGAAACGCCGACAGAGGCGGCCAGTTTTGCCGTCGTGATACGTTGGCTTCCATCGCTGGATT
CCAGCATCAGCGCCAGAGACTGAAGTATTTCCTCGCGACGGTTCCTTTTCGCAGTTTGTTTTTCTGCCAT
GTTACAAAATACCCCTGAAAATAAGCACTTGCCAGGCGGCACCCACGCTATGACCGCAAACGAAATGTTT
GCGGCTATGTTATGACGTTATTCGGATGCGTATGTGTTACTGACGACCAGAGTGACCAAAGCCGCCTTCA
CCGCGGTCGGTGGCGTCGAAATCTTCCACCAGATTAAATTCAGCCTGTACTACCGGAACAAAAATCATCT
GGGCGATGCGTTCGCCAGGTTGAATGGTGAAGCTGTCCTGACCACGGTTCCACACGGAAATCATCAACTG
GCCCTGATAGTCAGAATCGATCAATCCTACCAGGTTACCAAGCACGATACCGTGCTTATGTCCCAATCCG
GAGCGCGGCAGCATCATTGCCGCCAGTGAAGGATCGGCAATATGAATCGCCAGCCCGGTCGGAACTAGCG
TAGTGTCACCCGGAGCCAGTTCTACGGCGTCGTCGAGACAGGCACGCAGGTCAAGTCCGGCAGAGCCAGA
GGTGGCATAAGTCGGGAGCGGAAATTCCTTCCCAACGCGCGGGTCCAGAATCTTAACGTCGATTTTTTTC
ATCATAACGGGTCACGATCTCGTCGAGTAATAATTGGCCAAGGAGCTCTTTGCGCTCAAGCGGTAAGACT
TTATCTCCGTCCTGCCAGAAAAGGTGTAATGCGTTGTTGTCGCTGTTAAATCCTTGAGTTGGCTGGGAAA
CATCGTTCGCGCAGATCAGATCAAGGTTTTTACGGATACGTTTTTGCCGGGCGTATTCTTCCACATTATT
TGTTTCGGCGGCAAATCCAACGACGTAGGGTCGATGGTCTTTTAGTGCGGCAACGCCTGCGACGATATCG
GGGTTTTTAACCATTTTTATTGTTAATTCATCACCCTGCGTGGCCTGCTTTTTGATTTTTTCTGGGGCCA
CGGTAGCTGCGCGATAATCCGCCACGGCGGCGCAACCGATAAAAATATTTTGCTGCTGTACAGAAGCATT
CACGGCGGCTTCCATTTCCAGCGCGGTCATCACATCAACACGGTTAACAAACGGTGGCGTCGGTAGTGAA
ACCGGACCTGATACCAGCGTGACGTTCGCGCCACGACGGGCTGCGGCGGCGGCGATAGCAAAACCCATCT
TGCCGGAGCTGTGATTAGAGATATAACGCACGGGATCGAGCGGTTCACGCGTCGGACCGGCGGTAATCAT
AATGTTCAGATGTTTCAGGTCGTTGACGGGCGAAAAATGCGCTACCGCCATATCCACAATGGTTAACGGA
TCGAGCATTCGCCCTGGGCCGATATCACCACAAGCCTGACTGCCGCTGTCTGGCCCCCAGATGAGCAAAC
CACGCGAGGCAAGCACCTCTAAATTATGCTGCGTGGCAGCGGCACGGTACATCTGCTGGTTCATGGCGGG
GAGCACGGCTACAGGCGCAGGTGTAGCCAGACAAATCGTCGATACCAGGTCATTCGCCATTCCGGCTGCA
ACACGGGCAATTAAATCTGCCGTGGCAGGGGCGAGAATCACTAAATCAGCCCATTTTCCCAGCTCAATAT
GGCCCATAGCGGCTTCGGCTGCCGGGTCCAGCAGACTGTCGGAAACGGGATAACCAGAAACCGCCTGCAA
GCTAAGTGGGGTGATAAAGGCTTTTGCCGCTTCGGTCATGGCTACGCGGACATCGGCCCCGCGATCGCGC
AAACGACGCACCAGTTCAGGGGTTTTATAGGCAGCAATACCGCCGCTAACGCCGAGAACGATTTTTTTAC
CGGCCAGGCTCATGATGATTTTTCCTGTTGGGTGACACCAGAAGTTGGCGATTTTATCACAATACTTTTG
TTGTCGTGCCTTCACCTGAGATTCACTTTGCGAGGCGCTTTCCAGGATTGAAAACTGGCCGTCGATTTAA
AGGAACGGCTATGACAGGATGCGAGCACCACAAAGGAGGTGAAGGTGAAAAACAATGCACAGCTGTTGAT
GCCGCGCGAAAAAATGCTGAAGTTTGGTATTAGCGCCTTAACGGATGTCGAGCTGCTGGCGCTATTTCTG
CGTACCGGAACGCGCGGTAAAGATGTATTAACCCTGGCAAAAGAGATGCTGGAGAATTTCGGCTCTCTTT
ATGGCTTGTTAACCTCTGAATATGAGCAATTTAGTGGCGTTCATGGAATTGGCGTGGCGAAATTCGCCCA
GTTAAAGGGGATTGCCGAACTGGCGCGGCGTTACTACAACGTACGGATGCGTGAAGAAAGCCCTTTACTC
AGCCCGGAGATGACGAGGGAATTTTTACAAAGCCAGCTCACGGGCGAGGAGCGGGAGATCTTTATGGTGA
TCTTTCTCGACTCCCAACACAGAGTTATAACGCATAGCCGTCTTTTTTCCGGCACGCTAAACCATGTTGA
AGTCCATCCTCGGGAAATTATCCGCGAAGCGATAAAAATAAACGCCTCGGCGCTGATCCTTGCGCATAAT
CACCCTTCGGGTTGTGCTGAACCCAGTAAAGCGGATAAACTCATTACTGAACGGATAATAAAGAGTTGTC
AGTTCATGGATTTACGCGTGCTCGACCATATCGTGATTGGGCGTGGAGAGTATGTTTCTTTTGCCGAACG
CGGCTGGATTTAACCCGCTATGCGCGATCCTTCGGGATCTTTGTCTGTTCGGGACTTGAGCACATCGCTG
AGTCAGCGTATACTACGCCACCTTTGAGAATCTCGGGTTTGGCATTTGGGCCTGGCAATCGAGAGTTCAC
ATAGAACTGCGATGACCGGGCTGTAAAGCCTGACGAGGCGCCAATACCCCATACGAAGCTCGAGCTAATT
TGATTTTTGGAGAATAGACATGTCCCGAGTCTGCCAAGTTACTGGCAAGCGTCCGGTGACCGGTAACAAC
CGTTCCCACGCACTGAACGCGACTAAACGCCGTTTCCTGCCGAATCTGCACTCTCACCGTTTCTGGGTTG
AGAGCGAGAAGCGTTTTGTCACCCTGCGCGTATCTGCTAAAGGTATGCGTGTAATCGATAAAAAAGGCAT
CGATACAGTTCTGGCTGAACTGCGTGCCCGTGGCGAAAAGTACTAAGTACTTAGAGGAAATAAATCATGG
CTAAAGGTATTCGTGAGAAAATCAAGCTGGTTTCTTCTGCTGGTACTGGTCACTTCTATACCACTACGAA
GAACAAACGTACTAAGCCGGAAAAACTGGAACTGAAAAAATTCGATCCAGTTGTTCGCCAGCACGTGATC
TACAAAGAAGCGAAAATCAAATAATTCTCGCTTTGATGTAACAAAAAACCTCGCCCCGGCGGGGTTTTTT
GTTATCTGCTTGCCCCCATATTGACTGCATCTGTTCATTCCTGGAGATGCTATGCCTGAATTACCCGAAG
TTGAAACCAGCCGTCGCGGCATAGAACCGCATCTCGTTGGTGCAACCATTCTTCATGCGGTGGTGCGCAA
CGGACGCTTGCGCTGGCCGGTTTCAGAAGAGATCTACCGTTTAAGCGACCAACCAGTGCTTAGCGTGCAG
CGCCGGGCTAAATATCTGCTGCTGGAGCTGCCTGAGGGCTGGATTATCATTCATTTGGGGATGTCTGGCA
GCCTGCGCATCCTTCCAGAAGAACTTCCCCCTGAAAAGCATGACCATGTGGATTTGGTGATGAGCAACGG
CAAAGTGCTGCGCTACACCGATCCGCGCCGCTTTGGTGCCTGGCTATGGACCAAAGAGCTGGAAGGGCAC
AACGTGCTGGCCCATCTTGGACCGGAGCCGCTTAGTGACGATTTCAACGGTGAGTACCTGCATCAGAAGT
GCGCGAAGAAAAAAACGGCGATTAAACCGTGGCTGATGGATAACAAGCTGGTGGTAGGCGTAGGGAATAT
CTATGCCAGCGAATCGCTGTTTGCGGCGGGGATCCATCCGGATCGGCTGGCGTCATCACTGTCGCTGGCG
GAGTGTGAATTGTTAGCTCGGGTGATTAAAGCGGTGTTGCTGCGTTCGATTGAGCAGGGCGGTACAACGC
TGAAAGATTTTCTGCAAAGTGATGGTAAACCGGGCTATTTCGCTCAGGAATTGCAGGTTTACGGGCGAAA
AGGTGAGCCGTGTCGGGTGTGCGGTACGCCGATTGTGGCGACTAAACATGCGCAGCGGGCAACGTTTTAT
TGTCGGCAGTGCCAGAAGTAATTGATGCGCGCCGGATGGCATACCATCCGGCATAAACGCTACGCTAACT
TCGCCATCAGCGCCTGATGGACATTCTCCGGCAGGAAATGGGTGACATCGCCCTGATGGCGCGCCACCTC
TTTCACCAACGATGAAGAGATAAACGACCACTCTTTCGACGGCATCAGAAACACACTTTCCAGTTCTGGC
ATTAAGTGGCGATTCATATGCGCCAGCTGCATTTCATATTCAAAATCCGCCACCGCACGCAGGCCACGAA
TCAGCACCGTAGCGTGTTGATTACGGGCGAAGTTCGCCATCAAATCACTAAACCCGACCACTTCCACGCT
CCCCAGATGCGCGGTTGCCTGCTGTGCCAGCTCCACACGCTCTTCCAGGGTAAACATCGGTTTTTTACTG
GGACTAGCGGCAATCGCCAGAATAACGTGATCGAACATTTGCGTGGCGCGCGTCACGATATCGATATGAC
CATTGGTAATAGGATCGAAAGTACCCGGATAAATCGCCCGTTTTTGCATAACAACCTCAATGCGTTTTCG
GTGGCAGGTAAGGTTCCAGCAGTTGAAGCAGACGCTGTAGTGCGCCCTGGTTTTGATACAGCACTTCAAC
GGCATGACGGCCATAGAAACTACGGTAATCGGCGTCGGTGAGTAAAGAGGAAACCTCTTTTGCAAGCGTA
GTGGCATCGGTAACGGTAATCAGCCCGCTTGCCTGCTCCAGCCGCGCGCAAATGTCTTTAAAGTTAAACG
TATGCGGCCCCATCAATACCGGAATAGCGTGTGCGGCCGCTTCCAGCGGATTATGCCCACCACGTTCAAC
CAGTGAACCGCCAACAAAGGCGAGATCGGCAATGCCGTACAGTAACATCAACTCGCCCATCGTATCGCCA
ACCACAACCTGCGTGCTGGTGGAGGGGACTTCCCCTGAAGATCGTGTGATATAGCTTAGTCCAGCCTGGC
GGACAAGGTTAATCGCATCCGGGAAGCGTTCTGGATGACGGGGTACCAGGATGAGCAATAAATTCGGGAA
TTGCTGTAACAATGCCTGATGTGCGGCGATCACCACACTCTCTTCGCCTTCGTGAGTGCTGGTGGCAATC
CATACCGGGCGGTGTGGTGCCCACTGGCGGCGCAGCGTCACTGCTTTAGCAGCCAACTGCGGCGTTACAG
AAATATCGAATTTCAGGCTACCGGTAACGGTCACCTGATTATTTTTTGCGCCCAGCGCCACAAAACGTGC
ACCATCTTCTTCATTTTGGGCGGCAATCAGCGTAATACGACGCAGCAAGCGGCGGACGAATTTACCCAGT
TTGGCATAACCTGCGGCCGAGCGGGCAGAGAGTCGCGCGTTAGCGATCACCAGCGGAATTTTACGTTTAT
GTAGCGCCGCAATCAGGTTAGGCCATAGTTCAGTTTCCATAATCAACACCAGTTTAGGGTCGACTTTATT
CAGGAAACGGTTGAGTGCATCGGGCAGGTCATACGGCAGATAAACGTGCTGAACATCCTTCCCGAAAGCC
GATTGTACGCGCTCCGAACCGGTTGGAGTCATGGTTGTTACGGTAATCGGTAAATCAGGATAACGATGAC
GCAGTGCGCGCACCAACGGGATCGCCGCCAGAGTTTCACCGACGGAGACGGAGTGCAGCATAATGCCGCC
TGGTTTTAGCGGATGGCGGTAAAAACCGTAACGTTCACCCCAGCGTTTTCGATAGGCCGGAGCCTTACGT
CCGCGCACCCAGAGCCGTATCCAGATCAGCGGCTGAATAAGGTAGAGAAGGGCGGTGTAAAGCAATTCGA
GCATAGTAAATAGCTGACTTATGGATGTGCTGGGGATTCTATGTATTTAGCTGTGGCTTTACCATTACTT
TTCCCGTTTTTGACTTAAATAGCAATTTACCCGCCAATTCTTGCTGAACATCTATACTTTTTTTGTATTT
TTATGCGATTCATTGATTTCTGCAGTACGTGCAGGAAGGAATCGCAGAGCAACAGTAAAAAGAATATGGT
TGCTAATGATTTTATTTGATTGATTTCTTTATTGAAAATCAACAATGTGCTTAAAAATCATTCGGGTCGG
ATTGCCGCGAAAGAAGTGATACACTAGCGCGTCAATATCAGTGCGGTATCAGTATTCAGGTAGCTGTTGA
GCCTGGGGCGGTAGCGTGCTTTTTCTGCTTCACCTTAATCGGATAATCTCAACAAAAAGAGTTACTTGTG
GATAAGCCATTTCGAAGAATTTTGCTCATTAAGATGCGTTTTCATGGGGATATGTTATTAACTACTCCCG
TCATTAGTTCGCTGAAAAAAAATTACCCTGACGCAAAAATCGATGTGCTGCTTTATCAGGACACCATCCC
GATCCTGTCTGAAAATCCAGAGATTAACGCGCTCTACGGCATAAAAAATAAAAAAGCAAAAGCCTCAGAA
AAAATTGCCAACTTTTTTCATCTCATCAAGGTATTACGTGCCAATAAGTATGACCTTATCGTTAATCTTA
CCGATCAATGGATGGTTGCTATACTGGTTCGCTTATTAAATGCCCGTGTGAAAATTTCCCAGGATTATCA
TCATCGGCAGTCTGCTTTTTGGCGTAATAGTTTCACTCATTTGGTGCCGTTGCAGGGTGGAAATGTGGTG
GAAAGTAACTTATCCGTGCTGACGCCATTGGGACTTGAATCGTTGGTGAAGCAGACAACCATGAGTTACC
CGCCTGCAAGCTGGAAACGTATGCGTCGCGAACTTGATCACGCTGGTGTTGGACAAAATTATGTGGTTAT
CCAACCTACGGCGCGGCAAATCTTCAAATGCTGGGACAACGCCAAGTTTTCCGCTGTGATTGATGCCTTA
CATGCTCGTGGTTATGAAGTCGTTCTGACGTCCGGCCCAGATAAAGACGATCTGGCCTGCGTCAATGAAA
TTGCGCAGGGATGCCAGACGCCACCAGTAACGGCGCTGGCCGGAAAGGTGACCTTCCCGGAACTTGGTGC
GTTAATCGATCATGCGCAGCTGTTTATTGGCGTTGATTCCGCACCGGCGCATATTGCCGCTGCAGTTAAT
ACGCCGCTGATATCGCTGTTTGGTGCGACGGACCATATTTTCTGGCGTCCCTGGTCAAATAACATGATTC
AATTCTGGGCGGGAGATTACCGGGAAATGCCAACGCGCGATCAGCGTGACCGAAATGAGATGTATCTTTC
GGTTATTCCGGCGGCAGATGTCATTGCAGCTGTCGATAAATTACTTCCCTCTTCCACGACAGGTACGTCG
TTATGATCGTTGCTTTTTGTTTATATAAATATTTTCCCTTTGGCGGTTTGCAGCGCGATTTTATGCGTAT
TGCTCAGACAGTCGCCGCCCGAGGTCATCATGTTCGGGTTTATACCCAGTCGTGGGAAGGCGAATGCCCT
GATGTATTTGAACTGATCAAAGTGCCGGTTAAATCGCATACCAATCACGGGCGCAATGCGGAATATTTTG
CCTGGGTGCAAAAACATTTACGTGAACACCCCGTCGATAGAGTCGTTGGATTTAATAAAATGCCGGGGCT
GGACGTTTATTATGCCGCTGATGTTTGTTATGCCGAGAAAGTAGCGCAGGAGAAAGGCTTTTTCTATCGC
CTGACGTCACGTTATCGCCATTATGCCGCCTTTGAGCGGGCAACCTTCGAACAGGGCAAGCCGGCACAGC
TGCTGATGCTGACAGATAAGCAAATCGCCGATTTCCAGAAACATTATCAGACTGAAGCGGAGCGTTTTCA
TATTCTGCCTCCGGGGATTTATCCTGATCGTAAATATAGCCAGCAACCAGCGAATAGCCGTGAAATCTTC
CGTAAGAAGAATGGAATAACCGAACAACAATATTTATTGTTGCAGGTCGGTTCAGACTTCACGCGTAAAG
GTGTCGATCGTTCCATTGAAGCACTTGCTTCGTTACCGGATTCGCTGCGCCACAACACATTACTATATGT
TGTTGGGCAGGATAAACCGCGAAAATTTGAGGCGCTGGCAGAAAAACGCGGCGTGCGCAGTAATGTTCAC
TTCTTCTCGGGGCGCAACGATGTCTCGGAATTAATGGCGGCGGCGGATTTATTACTGCATCCTGCCTACC
AGGAAGCGGCGGGAATTGTGCTGCTGGAAGCGATTACTGCAGGATTACCGGTACTAACAACAGCCGTTTG
TGGCTATGCGCATTATATTGTCGACGCCAATTGCGGCGAGGCTATTGCTGAGCCATTCCGCCAGGAAACA
TTGAATGAGATTTTACGCAAAGCGTTAACGCAATTTTCATTGCGCCAGGCCTGGGCGGAAAATGCGCGAC
ATTATGCTGATACACAAGATTTATACAGTCTGCCAGAAAAAGCGGCGGATATCATAACGGGTGGTCTGGA
TGGTTGAACTTAAAGAGCCGTTTGCCACGTTATGGCGCGGAAAAGATCCTTTTGAGGAAGTTAAAACTTT
GCAGGGTGAGGTATTTCGTGAACTGGAAACTCGCCGTACTCTGCGCTTTGAAATGGCGGGCAAAAGCTAT
TTTCTCAAATGGCATCGCGGCACGACCCTGAAAGAGATAATCAAAAATTTACTCTCATTGCGGATGCCAG
TATTAGGCGCAGACCGCGAATGGAATGCGATTCATCGACTGCGGGATGTCGGCGTTGATACTATGTATGG
GGTGGCATTTGGCGAAAAAGGTATTAATCCGCTGACCAGAACCTCGTTTATTATTACCGAAGATCTGACA
CCAACCATTAGTCTGGAGGATTACTGTGCTGACTGGGCAACCAACCCACCAGATGTTCGCGTAAAGCGTA
TGCTTATTAAGCGTGTAGCGACGATGGTGCGCGATATGCATGCTGCGGGCATTAACCACCGTGACTGTTA
TATCTGTCATTTCCTGCTGCATTTGCCTTTTTCCGGTAAGGAAGAGGAGTTAAAAATTTCAGTAATTGAC
CTGCACCGGGCGCAGATACGTGCAAAAGTACCGCGTCGTTGGCGGGATAAAGATTTGATTGGTTTGTATT
TTTCATCAATGAATATTGGGCTGACGCAGAGAGATATCTGGCGATTTATGAAGGTTTATTTTGGGATGCC
TTTACGTGAGATATTATCTTTTGAACGGAATTTATTGAACATGGCAAGTGTTAAGGCCGAGCATATTAAA
GAGCGAACACAACGCAAAGGATTATAAAAATATTAATCAGTATGTACTGGAACTAACTTCATTATGACTA
TTTATTTTATAAACTGGGTTGCAGATTATGAATTAAAAATGATCCAGTACTTGAAAAAAAAGCACAAGAT
AAAAAATATAACAACACCAAAAAAATACAACTGGGTTAATAAGAAAATTTCGAAATTAGGGATGGATAAT
GCATGGTTGGGACGATTATTTATCAAACATCACCTAAATGCTGTAAAAAAGGATGATATCATTATATTTA
ATGACAGTGTCATTAATAAAAATATTAACAAGCAAATATTAAAAAATATTAATTGTCATAAAGTATTACT
TCTAAGAAATACTGTCAGTGAAAATTTTATTTTTGATAACACTAATTATTTTGATATTATCTATGATTTT
GAGCATAGATTTATAGGGAATGAAAAGATCAAGGCAATAGAACAATTTTTTCCTATAGGAATGGATGAAA
TTAGAAATTATAGTTTATCTGACAAAAATAACAGTCAGCCAATATGTTTTTTTCTTGGTCGTGATAAAGG
ACGTCTTCAAATAATTAATGAATTAGCCGATAGATTAACAACACTAGGATGTAAGTTAGATTTTAATGTT
GTCAAAGATAAAACATCATCTCCGACTTCAAAGTATTTGATTGAAAAACAAATACCGTATGAAGAGAATA
TTAGAAGAACATTAAATGCTAATATAATTGTTGATATAACTAAAGAAAACCAATCTGGCTGGACTCTTCG
TATACTTGAGGCACTATTTTTCAATAAAAAATTAATTACTAATAATATAAATGTACTTGGTTCGGAAATC
TATAGTGAGTCTCGCTTTTTTATAATAGGTCATGATGATTGGGATAAGTTAGAGTATTTTATTAATTCAT
CTGTTAAACCAATGGATTATGATAGTTTATATAAATTCAGCCCTGATAAAATGATGTCAACAATTGTTTA
TGATTTTATAGAAAAATAAAACCGTTAAAACAGTGAGTTTTACTCAATTAATGAGAGTTTCAATGAAAAT
AGCATTTATCGGCGAAGCTGTTTCTGGATTTGGCGGCATGGAAACGGTCATTCGTGATGTTATTACTACC
TTCAGGCAACAACATATCTATAGTGAAATGTTTTTCTTTTGTCGTAATGATAAAATGGATAAGGGATGGC
TGGAAGGTATTAAGTACTCGTGTTCATTTTCCAATATTCGCTTAGGTTTTTTGCGTCGGGCGAAACATAT
TCATGCTTTAAGCAAATGGCTTCAAGATTATCAGCCAGATGTTGTTATTTGTATTGACGTTATCTCGTGT
TTGTATGCGGCCAAAGCACGTAAAAAATCAGGAATTGATGTGCCAGTATTTTCATGGCCGCATTTTTCTT
TAGATCACAAAAAACATGCTGAATATATCACCTGTGCAGACTATCATTTAGCCATCAGCTCTGGCATTAA
ACAGCAAATGATTAATCGGGGTGTACCAGAATCGACGATAAATGTTATTTTTAATCCAGTCGAAGCTAAA
GACACAGTCATTCCTGGGCCTGAGGAAGGTGAAACGGCAACGTTCATTTATGTTGGGCGTATGAAATTCG
AGGGCCAGAAGAGGGTTAAAGACCTGCTTGATGGTTTATCACAAGCGCAAGGTGACTGGAAACTCCATGT
ACTGGGTGATGGTTCTGATTTTGAAAAATGCCAGGCATATGGTAGAGAATTGAAGATTGATAATCGAATT
GTCTGGCATGGTTGGCAAAAACATCCATGGGAGGTAGTGCGTCAGGATATTAAGAAAGTCAGTGCATTGT
TATTAACCTCATCTTTTGAAGGTTTTCCAATGACCTTACTTGAATCAATGTCATGGGGGATTCCGTGTAT
CAGTGCCGATTGTGTCTCCGGTCCTGGTGACATTATTCAACCTGATGTCAATGGCCATTTGTATCAACCG
GGAGATATTGCTGGTTTTGTTACTCTTCTAAATAAATATATAGCAGGTGAAATTCATATCGAACATGAAA
AAATTCCTGCGTCGATCGATAAGTTTTATCAATCTAAGTATTATGATAGATTACATAATATAATTATTTC
TGCTATTTCCCGGAGGAAATAATGCAGCAGGTATTTTTCCAGGAAACTGAGTATCTAAATTCAGTTATTG
ATTATAATCATAAAGTAGAAACAGAAAATCTTTGTCTGGACATCGCTTATGGAACTGACAAAAACTTTCT
ATTTGGTTGCGGAATTTCGATTGCTTCAATATTAAAGTATAATGAAGGAAGTCGGTTGTGTTTCCACATT
TTTACTGATTATTTTTGTGATAATGATCGTAAGTATTTTGATGCCCTGGCATTACAGTATAAAACCAGAA
TTAAAATATATCTGATTAATGGTGATCGACTGCGCTCATTGCCTAGCACAAAGAACTGGACCCATGCAAT
ATATTTTCGTTTTGTTATTGCTGATTACTTTATTAGTAAGGTGGCTAAAGTCCTTTATCTGGATGCAGAT
ATCATTTGTCAGGGGACTATTGAGCCACTAATTAAATTCTCATTTCCTGACGATAAAGTCGCAATGGTTG
TTACAGAAGGACAAGCTGACTGGTGGGAAAAACGCGCCCATTCGTTAGGTGTTGCGGGAATTGCTAAAGG
TTACTTTAACTCCGGTTTTTTATTGATTAATACTGCCAAATGGGCGGCTCAGCAGGTTTCTGCACGAGCC
ATTGCAATGCTAAATGAGCCAGGAATAATCAAAAAAATAACACATCCTGATCAGGATGTATTAAATATGT
TGCTGGCAGATAAACTTATTTTCGCTGATATTAAATATAACACCCAGTTTAGCTTAAATTATCAACTAAA
AGAAAGCTTTATAAACCCAGTAACCAACAATACTATTTTTATCCATTATATCGGGCCAACCAAGCCCTGG
CATGATTGGGCCTGGGATTATCCTGTATCACAAGCCTTTATGGAGGCAAAAAATGCTTCGCCATGGAAGA
ATACGGCGTTGCTGAAACCGAACAATAGCAATCAATTAAGATATAGCGCAAAACATATGCTTAAAAAACA
TAGATATCTAAAAGGATTTAGCAACTATCTTTTTTATTTTATTGAAAAGATAAAGCATTAAAACTGAGAA
ACAATAAAGTAATGATATAAGGGTAGCATTGTGGACTCATTTTCTGCCATAGAGATAGATAAAGTTAAAG
CCTGGGATTTTCGGCTGGGTAATATAAATACTTCTGAATGTTTAAATGTTGCCTATGGTGTCGATGCTAA
TTATCTTGATGGTGTAGGTGTTTCCATTACATCAATTGTCCTAAATAATCGACATATTAATCTTGATTTT
TATATTATTGCTGATGTTTATAATGATGCTTTTTTTCAAAAAGTTGCAAAGCTTGCAGAGCAATACCAAT
TAAGAATCACATTATATAGAATTAACACTGATAAGCTCCAGTGCTTGCCTTGTACACAGGTCTGGTCAAG
AGCAATGTACTTCCGTTTATTTGCATTTCAATTATTGGGTTTAACACTTGATCGTTTGCTTTATCTTGAT
GCAGATGTTGTTTGTAAAGGCGATATTAGCCAACTATTGCATCTGGATTTAAACGGAGCGGTTGCAGCTG
TTGTTAAAGATGTTGACCCAATGCAGGAAAAGGCGGCATCCAGGTTGTCTGATCCTGAATTACTTGGGCA
GTACTTTAATTCTGGTGTCGTTTATTTAGATTTAAAAAAATGGGCTAACGCAAAACTAACAGAAAAAGCG
TTGTCTATTCTTATGAGTAAAGATAATGTGTATAAATACCCTGATCAGGATGTTATGAATGTCTTACTGA
AAGGGATGACAATATTTTTGCCTCGTGGATATAATACAATTTATACAATTAAAAGTGAATTAAAAGACAA
AACACATCAAAACTATAAAAAGCTGATTACAGAAAGTACTCTGCTTATTCACTATACAGGTGCAACTAAA
CCGTGGCACAAATGGGCAATTTATCCATCGGTAAAATACTATAAAATAGCTTTAGAAAATTCACCATGGA
AAGATGACTCTCCACGAGATGCAAAATCAATTATTGAATTTAAAAAAAGATATAAACATCTTTTAGTACA
GCATAAATATATCTCAGGAATTATAGCAGGAGTCTGTTATCTTTGCCGAAAATATTACCCTAAATAACAT
TTAACTGGTTTATTATGATTCAGAAGAGCAAGATCAAAGACTTGGTTGTTTTTACCGATGAAAACAATTC
AAACTATCTCAATGTATTAAATGACTTCTTGTCTTATAATATAAATATCATCAAGGTTTTTCGTTCTATT
GATGATACAAAAGTTATGCTTATTGATACCGATTACGGTAAATTGATTCTTAAGGTTTTTTCTCCGAAAG
TTAAGCGTAACGAGCGTTTCTTTAAGTCTCTGTTAAAAGGTGATTATTACGAACGCCTTTTTGAGCAAAC
CCAAAAAGTAAGAAATGAAGGGTTAAATACACTCAATGATTTTTATTTATTAGCTGAACGGAAAACCTTA
CGATTTGTCCATACTTATATCATGATCATCGAGTATATTGATGGCATAGAGTTGTGTGATATACCTGATA
TTGATGATGTGCTAAAAAATAAAATTCAGCAATCAATTAATTCCTTACATCAACATGGCATGGTTTCTGG
CGACCCCCATCGTGGTAACTTCATTATAAAAAATGGTGAGGTTCGAATTATTGATCTCTCCGGAAAACGT
GCTTCAGCGCAGCGTAAAGCGAAAGATCGTATTGACTTAGAGCGTCATTACGGTATTAAAAATGAGATTA
AAGATCTAGGCTATTATCTTTTAGTATATCGTAAAAAAATGCGCAATTTTATGCGGCGTTTGAAAGGGAA
ACCAGCGCGCTAAAATAGAAATACCCACAATTACATGTCTTCACCAGGACAGTTTTAAACGGAGTTATTT
ATTTCACAGGTTTATCATGAAGAATATTAGATACATTGACAAAAAAGATGTTGAAAACCTGATTGAAAAT
AAAACATCTGATGATGTTATTATTTTTCTTTCTGGCCCTACATCGCAAAAAACACCTTTGTCAGCATTAC
GAACAAAGGATATTATTGCTGTCAATGGTTCTGCGCAATATTTGTTAAGTCATAATATCGTTCCTTTTAT
ATATGTACTTACAGATGTCCGCTTTTTACATCAGCGTCGTGATGATTTTTATAAATTTAGCCAGAGAAGT
CGTTATACCATAGTAAACGTTGACGTTTATGAACACGCTTCCAAAGAAGACAAACTTTATATCCTCCAGA
ACTGCCTCGTATTACGATCTTTTTACCGCCGAGAAAAAGGCGGTTTGATAAAGAAGATTAAATTTAATAT
TTTGAGCCAGATTCACAAAGAACTGCTGATCTCTGTACCGTTGTCTAAAAAAGGTCGTCTGGTTGGATTT
TGCAAGGACATTAGTCTTGGTTATTGCTCATGCCATACTATTGCCTTCGCTGCAATTCAAATAGCATATT
CACTTAAGTATGCACGGATTATTTGTTCTGGTCTTGATTTAACGGGTAACTGCTCTCGTGTCTATGACGA
AAATAATAATCCCATGCCCTCGGAATTGAGTAAGGATTTATTCAAAATCTTGCCATTTTTCCGTTTTATG
CGTGATAATGTAGATGATATTAATATTTATAATTTGTCGGATGATACAGCAATTCAATATGATATCATTC
CATTTATGGAACTGTCATAAATTTTATAATCTTGGGTTTGCTAAAAAATAATCTAGTATTTTCTATGTCT
TTATTTCGTATTATCAAAATATTGGAGTTGGCTAATAATGATTAAAAAGATAATATTTACCGTCACACCA
ATATTTTCTATACCGCCAAAAGGAGCTGCAGCGGTTGAAACATGGATTTATCAGGTCGCCAAAAGACTTT
CGATTCCAGCAACTATCGCATGTATTCGAAACGACGGCTACCCTATCTACACAAAAGTAAATGATAATTG
TGATATTCACTACATTGGTTTTAGTCGAGTCTATAAACGACTTTTCCAAAAGTGGACTCGACTTGATCCT
GTGCCGTATTCTCAGCGCATTTTAAATACTCAACCTAAAAATGCTGATCCGAAAGACTCAGTTATTGTTA
TCCACAATAGTATGAAGCTGTATAAACAGATTCGTGGCAGAAGCCCTCAAGCGCAGCTAGTCATGCACCT
TCACAATGCTTTTGAACCAGGGCAGTTAGACAAAAATGCAAAGATAATTGTTCCTAGCCAGTTTCTGTTC
GATTTCTATTCGGAAAAAATGCCTGATGCAGATATCGCTATTGTGCCTAATGGTTTTTGCTCTGAATCGT
ATTCACATGATAATACTGAAAATTTAAGGAAGAAATTTAACATAGATGCGAATGATACGGTGTTATTATT
TGCAGGAAGGATATCGCCAGATAAAGGCTGTCTGATGCTTATGGATGCTTTCAATAAGCTGTGTAAGGAT
CGAGACAATCTTAAATTGGTTATTGTTGGTGATCCTTTTGCCAGTAAAAAAGGTGAAAAAGCTGAATATC
AGAATAAGGTTCTGGATGAAGCGAAAGCTATTGGCGCGCAATGTATTATGGCGGGTGGGCAGCCACCGGA
GCAGATGCATAAATATTACCGCTTAGCAGATTTAGTTGTTGTTCCTTCCCAGGTAGAAGAAGCTTTTTGC
ATGGTAGCAGTTGAAGCGATGGCGGCTGGTAAACCTGTTCTTGCAAGTCAAAAAGGTGGGATAAACGAGT
TTGTTCTGGAAGGAATAACAGGATATCACCTTGCAGAACCTATGACGTCTGAAAGCATTCTCTCTGATAT
CAACCGGGTCTTAGCAGACAGTAATAAAGCACAAATTGCCGAAAATGCCCAGAAATTCGTTTTTTCAAAA
TATAGCTGGGAACATGTAACTCAGTGTTTTGAGGCACAAATGCAAGACTGGTTTGGTTAAAAATTATTTG
ATTTGAAGAGCCTGCCTGAACTCAATGTCAGGCAGGCTTTTTTTTATTTATTCCGCATAGCTAACAGCAA
ACCAACAATCAAGCCAATTGGTTTGAGATCAACTTCCTCGAAATTACCTCGGATAATATAAAAACCAACA
AGAGTTAAAAATAGCAGTAATTGACCATTATAAGGAGTGACCACCACTTTTTTAAATGTTGCGTTAGCTG
TTTCTTTGATAATAGAGCCATACAGATAAAGTAAAGCGAGTAGCCCAGCTAAACCTGCTGCAAACCAAAT
TGATAAAATAATGTTGTGTGGTCCAATGGATTGTCTGAAAGTCCATGATGGAAAATCTACGACACGCTTA
TTGTATATTGCATGGTAAATATCATCGCCATAGCCATATCCCTTAAGCGGGTTCTCCATAATTAATGTCC
ATGCTGTACCTTGTGTACCATTGGTATAGCGATAAGAACTGTCGGTCTGTTGAAGTTTATAAATAAGCCT
ATCTTCATCGGTATGATCACCTTTAAAGGTAAATACGCAAGTTGCTGCAACAGAAATAACGATAGAGGTC
AGCATCAATAATTTCCACTGACGATTTAAGATTAACCATAGTAGAGTCACTATGAATACTGCCAGCCATG
CACCACGAGAGAGCGTTCCTAATAGCAGAAACAAGAAAACTGCGCTAAAAATTATGAATATTATTTTATA
AGAGGTTTTCTTGATAAGCCAAAGGTTTAATAATGCTGGAAATAGAAACACCATTGAGTCGGAAATACTA
CGATGTTCATAGGTCGAAAATGGCATTATTCCTTTATTATAATCCTGAATATAAGAAATAATTTCAACAA
GACAACGTAACCCAAGCCCGGTAACTAATGAGTATAGTACAACTTTACCGATGCTTTCATTATCTTCATC
TTTTAATAATACGGGTATAAGTAAACTATATGCCAAAAATCCTTTTAGCACCGTGTTACTGAATTCTTTA
AAACTTATTTTCAGATCTGGTGATATGAAAGTGGCATATAAAAGAATGAGTGACAGAGCCAAGACACTAT
AAAAAAGATTATTTTTGTAGAGCTCTTTGAATGTCCCTGGAGCACGGAAAACTTGATAAATTACCGTAAT
AATCATTAGTACAGATATGATATGTTTATAACGGGTAATACCATCAAGGAAAAAGGTCGCAATAAAAAGG
AATACCAACACTCTATTCCAGTATGGTTTCCAATTCTCTTTATTACGCAGCGCCAGCGAGGCTGTTAACA
TTGCTTCTCCACCATCTTAATAATATAGAACGTGTTAATCAGGATTGATTTTTTTAAATACTGTTTCTGC
AGCCAGATGAGCAAGATCTTTATCCGGAGCCCTACAAACCATCTGATTCTTCCCATACCCACCAATTAAT
CCCGGATCGGTAGGTCCATAAACCGTGATATTGGGTCTATCCAGTGCCGCCGTTAAATGGCTTAACCCCG
TATCCACCGACACTACAAATTTAGCCCCGGCCAGTACGCGGGCAACGCCTTCCAGACTCATCTTCGGCAA
TACTTCAACATAAGCAAATCCTTCCGCCAGTCGTTTCGCCCGTTCTTCCTCATGCGGCGCGCCCCACGGA
AGTTTAATCCGTATTCCTGAATCAGCCAGTAAACCAATCAATTCTCGCCAGTGTTCTTCCGGCCAGTGTT
TATCATCTCGGGTTGTTGCATGAAGAAATACGGCATATTCGCCAGCATCTGTAGGCAGGTTCGTCAGGAA
ATGCTGTGCGATAGCATAATCGCCCTGGGTTTGCGGTTTGCTATAGCCCAGACTTTTGGCAAACAGTTCG
CGGGTGCGTTCTACGGCGTGCTGCTGTTTTGCAATATGATGCTTACGATTGTAAAACAGGCTGGCTAAAG
GTTCGCGAGCGGTTTGCCAGTCCATTCCATGCTTTACGCCATGCGCCAGACGCGTCACCAGCGCCGCGCT
TTTTACCAGCCCCTGAGCGTCGATAATTGCGTCATAGTTCTCTGCTTGTAGCGCTTCACGAAACGCTTTC
CGTTCAGCTTTTATGGGGGCCGAGAACCAGGCTTTACGCCAGCGACGTATTGCCACAGGAATAACTCGCT
CAACGGCGGCGTGCCAGGAAGGAATCTGTGCGAACCCTTCTTCCACCACCCAGTCAAACTTAATCCCCGG
GATTGCCTGCTGGGCATCAGTGAGTGCGGGCAACGTATGGAGAACATCGCCCATCGACGATGTTTTAACG
ATCAAAACCCGCATCCGTCAGGCTTCCTCTTGTAACAATAGCGCGTTGAGTTCTTCCAGTACGCGCTGGG
GAGTAATGTCGATCAAGCTCTGGTGATAACCCTCCGCAGCGTCACCTTTACGCACTTTGTGATAGCCGGT
AATCAGGCGGATCACACGCGCTTTATGGGATAGCGGCGGTGTGAAGTCCGGGCTACTCGGACCATACAGG
GCAACCAGCGGACGATTGAGCGCCGCCGCAACGTGCATCAGGCCAGAATCGTTAGTGACAATGGCTTTAC
AGGCTGCAATCAGGATAACTGCTTGATCAAGCTGTGTTTCCCCCGCCAGGTTCCGGCACCATGCCTGCTG
CTCGGTATTCAAAGCGGCAAGAATCTCATTGCCCGCTTCATGATCTTTCGCCGAGCCAAACAGAACCACC
TGATAACCTTCATCAATCAGCTGCTTTGCCAGCTCAGCATAGTGGTAGTGTGGCCAGCGTTTTGCCGGAC
CAAACTCCGCCCCCGGGCAAAAACCAATCATCGGACGTTCTGATGAAAGCGAAAATTGATTACAGGTATA
TGATTTTTCACCTTCGCTCACCTGCAACTGCGGCCATAACAGCGGTTTTGGTAGATCTTGTGCGGTACGC
ATTACGCCTTTGTCATAGGCCAGCGCAACATAGCGTTCCACCATTAGCGGCCAGGCTTCTTTATCGAGCA
CGCGCACATCGTTGAGTAAACCGTAGCGCATTTCACCGCGCCAGCCGGTGCGATGAGGGATCCCCGCGAA
GAAAGGCACTAACGCGGATTTGAAGGAGTTGGGTAAGACGTAGGCACGGTCGTAGCGTTTTTCGCGCAGA
CTATGACCCAGCTTGCGGCGTTCGCCGATTTCCAGCGCCCCGTGACCGAGGGGCATAGGGATGGCTTCGT
TAACTTCCGGCATCCGCGATAATAACGGACGGCACCAGGCCGGTGCCATCACGTCGATTATCGCCTGGGG
ATAGCGCGCCTGGAGCGTGCGATAGAGACTTTGCGACATCATCATGTCGCCAACCCAAGACGGGCCGATC
ACCAGTATTTTCATGCAGAGCTCTTATGCGTCACGATTCAGCCAAGCCATGTATTCCGTTACACCTTCGG
CAACGGTTTTGAACGGTTTATCGTAACCCGCCGCGCGCAGATTCGTCAGATCTGCCTGCGTGAATGCCTG
GTAGCGGCCTTTCAGTTTATCCGGGAACGGAATGTATTCGATTTGGCCTTTCTTGTGATAAGCAAGCGTA
GCATCTGCTACAGCCTGGAAGGATTCCGCACGACCAGTACCGAGGTTGAAGATGCCGGAAACGCCATTTT
CCAGGAACCACAGGTTTACATCTGCCACGTCGCCCACATAGACGAAGTCGCGTTTAAAGTTCTCGCTACC
TTCGAACAGCTTCGGTGATTCACCGTTATTAAGCTGGGTGTTGAGATGGAAAGCGACGCTCGCCATGCTG
CCTTTATGGCCTTCACGCGGCCCATAAACGTTGAAATAGCGGAAGCCAACAATCTGTGAGTTTGCTTCTG
GCAGGATTTGGCGAACATATTCATCAAACAGGAACTTCGAATAACCGTAGACGTTCAGCGGTTTTTCGTA
TTCACGGGATTCAATAAAGTCGGAGGTGCGTCCGCCGTAAGTGGCTGCGGAAGATGCATACAGGAACGGG
ATTTCGCGCTCCAGGCAGTAGTGCAGCAGCTCTTTGGAGTATTGATAGTTGTTATCCATCATATACTTGC
CATCCCACTCGGTGGTGGAAGAGCATGCGCCTTCGTGGAAAATCGCTTCGACATCGCCGAACTCTTCGCC
AGCCATAATCTGGATCAGGAAGTCTTCCTTATCCATATAGTCCGCGATATTCAGATCCACCAGGTTCACA
AACTTGGTGCCGTCTTTCAGGTTGTCCACCACCAGAATATCGGTGATGCCTTTATCATTCAGGGCCTTAA
CGATGTTGCTGCCGATAAAGCCCGCGCCGCCGGTAACGATGATCATAACTGTAACCTTCGAATTATGGAG
TCAGAGACAATCTCAGACACGAATACTTCTATCATATCACTACATGACGTTGGCTTCAGCCATTCACCAA
AAGTGAGGGGGCTGGACGTTATTTATCCTGAATTTTGCAGAAGTGTTAACGCGTCATCTCGTCGCGACCT
ATAAGTTTGGGTAATATGTGCTGGAATTTGCCCTGTCTGGAGAATCGCAATGCGTGGAGAATTTTATCAG
CAGTTAACCAACGATCTGGAAACCGCACGGGCGGAAGGGTTGTTTAAAGAAGAGCGCATTATTACGTCTG
CGCAGCAAGCAGATATCACTGTGGCTGATGGAAGCCACGTCATTAACTTTTGTGCCAACAACTATCTCGG
ACTGGCGAATCATCCGGATCTGATTGCGGCGGCAAAGGCGGGAATGGATTCTCACGGTTTCGGCATGGCT
TCGGTGCGTTTTATTTGCGGCACTCAGGACAGCCATAAAGAGCTTGAACAAAAACTGGCGGCCTTCCTGG
GGATGGAAGATGCCATTCTCTACTCTTCCTGCTTTGATGCTAACGGTGGCCTGTTCGAAACGCTGTTAGG
CGCGGAAGACGCCATTATCTCCGACGCACTGAACCACGCGTCTATTATTGATGGTGTGCGTCTGTGCAAA
GCTAAACGCTATCGTTATGCCAACAACGATATGCAGGAGCTGGAAGCACGTCTGAAAGAAGCGCGTGAAG
CCGGTGCGCGTCATGTGCTGATTGCCACCGATGGTGTGTTCTCGATGGACGGCGTGATTGCCAACCTGAA
AGGTGTTTGCGATCTCGCAGATAAATACGATGCCCTGGTGATGGTAGACGACTCCCACGCGGTCGGTTTT
GTCGGTGAAAACGGTCGTGGTTCCCATGAATACTGCGATGTGATGGGCCGGGTCGATATTATCACCGGCA
CGCTCGGTAAAGCGCTGGGTGGCGCTTCTGGCGGCTACACGGCGGCGCGCAAAGAAGTGGTTGAGTGGCT
GCGCCAGCGTTCTCGTCCGTACCTGTTCTCCAACTCGTTGGCACCGGCGATTGTCGCCGCGTCCATCAAA
GTGCTGGAGATGGTTGAAGCGGGTAGCGAGCTGCGTGACCGTCTGTGGGCGAACGCGCGTCAGTTCCGTG
AGCAAATGTCGGCGGCGGGCTTTACCCTGGCGGGAGCCGATCACGCCATTATTCCCGTCATGCTTGGCGA
TGCGGTAGTGGCGCAGAAATTTGCCCGTGAGCTGCAAAAAGAGGGCATTTACGTCACCGGTTTCTTCTAT
CCGGTCGTTCCTAAAGGTCAGGCGCGTATTCGTACCCAGATGTCTGCGGCGCATACCCCTGAGCAAATTA
CGCGTGCAGTAGAAGCATTCACGCGTATTGGTAAACAACTGGGCGTTATCGCCTGAGGGTGTGAGATGAA
AGCGTTATCCAAACTGAAAGCGGAAGAGGGCATCTGGATGACTGACGTTCCTGTACCGGAACTCGGGCAT
AACGATCTGCTGATTAAAATCCGTAAAACAGCCATCTGCGGGACTGACGTTCACATCTATAACTGGGATG
AGTGGTCGCAAAAAACCATCCCGGTGCCGATGGTCGTGGGCCATGAATATGTCGGTGAAGTGGTAGGTAT
TGGTCAGGAAGTGAAAGGCTTCAAGATTGGCGATCGCGTTTCTGGCGAAGGCCATATCACCTGCGGTCAC
TGTCGCAACTGTCGTGGCGGTCGTACCCATCTGTGCCGCAACACGATCGGCGTCGGTGTTAACCGTCCGG
GCTGCTTTGCCGAGTATCTGGTGATTCCGGCGTTCAACGCCTTCAAAATCCCGGACAATATCTCCGACGA
CCTGGCTTCCATTTTTGATCCCTTCGGTAACGCTGTGCATACCGCGCTGTCGTTCGATCTGGTTGGCGAG
GATGTGCTGGTCTCTGGTGCAGGTCCGATAGGTATTATGGCTGCGGCGGTGGCGAAACACGTTGGTGCAC
GCAATGTGGTGATCACTGATGTTAACGAATACCGCCTTGAGCTGGCACGCAAAATGGGTATCACCCGTGC
GGTTAACGTCGCTAAAGAAAACCTTAATGATGTGATGACAGAACTGGGCATGACCGAAGGCTTTGATGTC
GGTCTGGAAATGTCCGGTGCGCCGCCAGCGTTTCGTACCATGCTCGACACCATGAACCACGGTGGTCGTA
TTGCGATGCTGGGTATTCCACCGTCCGATATGTCTATCGACTGGACCAAAGTAATCTTTAAAGGCTTGTT
CATTAAAGGTATTTACGGTCGTGAGATGTTTGAAACCTGGTACAAGATGGCGGCGCTGATTCAGTCTGGC
CTCGATCTCTCGCCGATCATTACCCATCGTTTCTCTATCGATGATTTCCAGAAGGGCTTTGACGCTATGC
GTTCGGGCCAGTCCGGGAAAGTTATTCTGAGCTGGGATTAACACGAACAAGGGCTGGTATTCCAGCCCTT
TTGCCTGAGGATAATCCGTTAAATATGTAAAATCCTGTCAGTGTAATCAAGAGTTCGTAATTGCGCTGAT
CTCTTATATAGCTGCTCTCATTATCTCTCTACCCTGAAGTGACTCTCTCACCGGTAAAAATAATATCTCA
CAGGCTTAATAGTTTCTTAATACAAAGCCTGTAAAACGTCAGGATAACTTCAGAGGTCGTCGGTAATTTA
TGATGAACAGCACCAATAAACTTAGTGTTATTATTCCGTTATATAATGCGGGCGATGATTTCCGCACTTG
TATGGAATCTTTAATTACGCAAACATGGACTGCTCTGGAAATCATTATTATTAACGATGGTTCAACGGAT
AATTCTGTTGAAATAGCAAAGCATTACGCAGAAAACTATCCGCACGTTCGTTTGTTGCATCAGGCGAATG
CTGGCGCATCGGTGGCGCGTAATCGTGGGATTGAAGTAGCAACGGGAAAATATGTCGCTTTTGTCGATGC
TGACGATGAGGTCTATCCCACCATGTACGAAACGCTGATGACCATGGCGTTAGAGGACGACCTCGACGTG
GCGCAGTGCAACGCTGATTGGTGTTTTCGTGAAACGGGTGAAACCTGGCAATCCATCCCTACCGATCGCC
TTCGCTCAACCGGTGTATTAACCGGTCCGGACTGGCTGCGGATGGGGCTTTCTTCCCGCCGTTGGACACA
CGTGGTCTGGATGGGGGTTTATCGCCGCGATGTTATTGTTAAAAATAACATTAAATTTATTGCCGGATTA
CATCATCAGGATATTGTCTGGACAACAGAATTTATGTTTAACGCGCTGCGTGCGCGATATACCGAGCAAT
CATTATATAAATATTATCTGCATAATACGTCAGTGAGTCGGTTGCATAGACAAGGGAATAAAAACCTTAA
TTATCAACGTCACTATATTAAGATTACCCGCCTGCTGGAGAAATTAAATCGAAATTATGCCGACAAAATT
ACGATTTATCCGGAATTTCATCAGCAAATAACTTACGAAGCATTGCGTGTTTGCCATGCGGTGCGCAAAG
AGCCGGATATTATTACCCGCCAACGGATGATTGCTGAGATATTTACTTCCGGTATGTATAAGCGCCTGAT
TACTAATGTGCGCAGCGTGAAGGTGGGTTACCAGGCGTTACTGTGGTCTTTCCGCTTATGGCAATGGCGC
GACAAAACGCGGTCGCACCATCGCATTACGCGTAGCGCCTTTAATTTGCGCTAGCGTTAAGTTTTGCCGC
TTCGGGCTGTTTGCCCCAGCCTTGCCACTGATGCTGGAAGTAAACGATCAGCGTGCTCTGGCTGATGCTT
TCGCTTAATACTTCAAAGAAGCGATTAGCATAAACAGGTTCCAGCGGCTTCTTCGGTTTGCACAGCTTCA
CGCCACGGAATGGATTACGCGGTGTGTCGGGCACAGTGTTTTTCGGCGGTGTAGACGTATCAACCTGCGG
TTCATTCAACAAGCTGCTGGCTTTCACCAGCGTAATGTCTGGCGGCAGGTTATAAACCATCTGTTGTAGC
ACGCGTACCGTTGAAGGGTGAGGATGCCCAATGGCAATGGTTGAACCGTTGCGACGCGCCAGATCAATTG
CGCGATTAAATTGCACACGGATGTCCGCTTCGTTCTGCGAATCGTCGAGGAACACCTTCCGTTTGATCAC
CTTCACGCCAGTGCCTTGCGCGGCGCGCATCGCCTGGGTATTACCGATGGTTACGCTGTCGAGGAAGTAA
AGATTGTAACGCTCCAGCGCCTGCATCACTTTCTGCATACCAAACAGGTTAGAGGTCATCTTGCTGCCCA
TGTGGTTATTGATCCCCACGGCATAGGGCACGTTATTGACCGCACTACGAATAATGCGCTCAATTTCGTC
GCTGCTCATCTCCGGGCGTAGCGTATTTTTCTCCAGCGGCTGTTTACTCAGTGGTGCCATCGGTAGATGA
ATCAACACTTCGTGACCGCTGTTATGTGCTTTGGTCGCCATCTCTCTGGCGTGTGGTGAATCGGGTAATA
CCGCAACGGAGATAGCGGAAGGCATCGCCAGCACCTGGTTTTCGTTGTGCGGGCGATACCCAAAATCATC
AATGACGATGGCAAGTTTGCCAGCAATTACGGGGGAGGAGAGCGCCAACAGAGCGGCAAATGCAAGAACG
TTACGACGAAATGGAAACAAAACTTATCTTCCCAACCACGGCTGTGGATTGACCGCCTGACCCTGGCGGC
GAATTTCGAAATAGAGTGAAGGCCGACCCTGACCGCCACTGCTGCCCACCAGTGCAATTGGCTGGCCCGC
GCGAACCTGCGAACCAACGCTCACCAGTGCGCTCTGATTATAGCCGTAAAGACTCATGTCGCCTTTACCA
TGCTCAACCACCACCACCAGACCGTAGCCTTGCAGCCAGTCAGCCAGAATCACCCGGCCGTCGGCAATCG
CTTTAACTTCAGTACCTTCAGAGGCACCAATCACCATCCCTTTCCAGCGTAATTCACCCTGTAGCTGTTC
GCCATAGCGATGCAGCGTCGGCCCGCGAACTGGCCAGAATGCCTGACCGCGCGGTGCGCCCAGACCACCG
GTACGGGACATCAGCGATTTTTCGCTTTCGGTCGGCTTGTAGGTGGTGCCTTTGCGCGTCGCTTCTTTCT
GGCGGTCGCGAACCGCCTGGGCTTCGCGGGCTTCACGTTCAGCACGCGCTTTCGCCGCAGCTTCCGCACG
GGCAATGCTGTTACGCAGGCGGGATTCGTTGGCGCGCAGCTCGCTCAACTGTTGCTGACCTTGCTGGATG
GAAGACTCCAGCCCTGCCAGCGTCTTTTTACGCTCGCTCAACGCCTGGGTCAGCTTCGCCTGTTGGGCGC
GCTGCTCATATAAAAGCGTTTGTTGCTCGCTTTGTTTCTCTTCCAGTTCGGCACGCTGCATAGCGACTTC
TTCACGCGTTTGTTTCAACTGAGCAATGGTTTCTTGTCGCGCCTGGTTGAGATAGCCGAAATAAGCCTGT
AACCGCTGCCCACGCTGGCTTTCTTCACCGCTGAGAATCAGCTGAATACCGGTATGTTCACCCTGACGAA
ACGCGGCATCCAGTTGCGCGGCGAGGCTGCGCTCCTGGGCGGCTTTTTGCTGCTCCAGTTTGGCAATCGA
CGCGTTCATCTCATCAATCTGTTTATTCAGTTGATTGAGCGTATTTTGCGTTTCGCGCAGTTTGCGAGTG
GCTTCAGAGATCGCTTCTTCCTGCTTTTTCAATTGTGCGAGCAGGCTTGCGCGTTGTTGTTGCTTTTGGC
GTACCGCGCGCTCTTTCGCGGCGATATCGGCCTGAATGGATTTGAGTTGGTCACGCTCATCCGCGTGGGC
GGAAAAGGCGCACAACAATACGCCAGCGCTCAGAACGCTGGCGTAGATGATGGGCCTGATTGCAAACCTG
CGCGGTTTCACGGCCCGTGTCATGGTATTAATCGCCTTTCCCCTCATGGGGAGGGATTATTCCACGATGA
ACAGCGGCTTACCAGTCATCTCTTGCGGGATTTCCATACCCATCAGCGACAACATGGTCGGCGCGATGTC
AGAAAGTTTGCCGCCTTCAACCGCTTTCACGTTCTTATCACCAACGTAAATCAGCGGAACTGGCAGGTTG
GTGTGTGCTGTGTGTGCCTGACCCGTTGCCGGATCGCGCATCTGTTCAGCGTTACCGTGGTCAGCGGTGA
TCAGCAGTTGTCCACCCACGGACTCAACCGCTTTCGCGACTTCTTCCACGCAGTGATCCAGCGCTTCAAC
CGCTTTAACCGCCGCTTCCATCACTCCGGTGTGACCTACCATGTCGCCGTTCGGATAGTTACAAATAATG
GTGTCGTATTTGCCGCTCTTGATTGCCGCAACCAGTTTTTCGGTCAGCTCTGCGGAGCTCATTTCCGGTT
GCAGATCGTAGGTAGCCACTTTCGGTGAGTTGATCAGAATGCGATCTTCGCCTTTGAACGACTCTTCTAC
GCCACCGTTGAAGAAGAAAGTAACGTGGGCATATTTTTCGGTTTCGGAAATACGCAGCTGAGTTTTGTCG
TTTTTCGCCATCCATTCGCCGAAGGTGTTAACCAGGGAAGCGGGTGGGTAAGCCACTGCGGTTTTGATGT
CGGCAGCGTATTCGGTCAGCATCACGAAATCGACGTTAACCACTTTCTTACGCGCGAAGCCGTCAAAATC
GGCATTTACGAATGCACGAGTGATTTCACGCGCGCGGTCAGCACGGAAGTTCATGAAAATCAGTGCATCG
CCGTCTTCCATTGCCGCATCTGGCTGACCTTCTGCACGAATAACGGTCGCTTTCACGAACTCGTCGTTTT
CGTCGCGAGCATAAGCAGCCTGCAAACCGGCAACGGCGGTATCGGCCTGGAACTCACCTTGCGCCAGAGT
CAGCAGGTCATAAGCTTTTTCAACGCGATCCCAACGGTTATCGCGGTCCATCGCGTAGTAACGACCAATG
ATGGACGCTACGCGGCCTTTACCCAGCGCGGTAAATTTCTCTTCGAATTTTTTCAGCGAGGATTCAGCAC
TGCGCGGCGGAGTGTCGCGACCGTCAAGGAATGCGTGTAGGTAGATTTTTTCTGCGCCGCGTTCAGCTGC
CAGTTCTACCATCGCCATGATGTGATCTTCGTGGCTGTGTACACCACCTGCGGAGAGCAGACCCATAATG
TGTACTGCTTTGCCTGCGTTTTTCGCTTTATCTACTGCACCAGTCAACACCGGATTAGCAAAGAAAGCGC
GATCTTTGATTTCAACGTCCAGACGAGTCAGGTCCTGATACACGATGCGGCCGGCACCCAGGTTAACGTG
GCCTACTTCGGAGTTACCCATCTGACGGTCAGGCAGACCGACTTCCAAACCGGAAGCGTCGATCAGGGTA
TGCGGACGATTGGCCCACAGTGCATCCATTACCGGGGTTTTAGCACTAAAAATGGCGTTATCCTGCTGTT
CTTCGCGATAGCCATAGCCATCCAGAATCACCAGTACCATAGGTTTTTTAGAAACCGACATTGCGACAAC
CTCATACTCAAGAGTCAAAATTTGCGTAATTTTACTACAGCTGAATCGATAAAATAGCCCCTGAAGATCA
AAATATACGACCGCTCGCGGCAAGCAGATGCCAGATTTACGCTTTTTTTTCGTAGCGCCCCGCAAAATTG
CATTCCAGTTAACGCGCTGGCTGTATTTGCCGCACTGCGCAGGTATACTCCTTTCCTGGTTTTTTTAATC
ACTACGTCGGGAGTTGTTACCCCCCATGCAAGAAATTATGCAATTTGTTGGCCGTCATCCCATACTGAGT
ATCGCCTGGATCGCGTTACTGGTGGCGGTTCTTGTGACTACGTTTAAGAGCCTGACCTCGAAAGTGAAGG
TGATTACTCGTGGTGAAGCTACGCGTCTGATCAACAAAGAAGACGCTGTGGTTGTGGATTTACGTCAGCG
TGATGACTTCCGTAAAGGCCATATCGCAGGTTCTATCAACCTGTTGCCGAGCGAAATCAAAGCCAACAAT
GTTGGTGAGCTTGAGAAGCACAAAGACAAACCGGTTATCGTGGTAGATGGTTCTGGCATGCAGTGCCAGG
AGCCTGCAAACGCGCTGACGAAAGCTGGTTTTGCGCAAGTATTCGTACTGAAAGAAGGCGTCGCTGGCTG
GGCTGGCGAAAACTTGCCTTTGGTGCGCGGCAAATAATTTACCTGCCGTTTTTCATGATGCAGGCCGTTA
GCTGCAATTAGGCCCCCAGCGACTTATTGATATAAGCTTCTGGGGACACTCCATTTTGCTGCCGCCCTGC
AACATGAAATTTCAGGGTAAAAAACAGGAGCTAATTTATGGCCAATGTTGAAATCTATACCAAAGAAACC
TGCCCGTATTGCCATCGTGCAAAAGCACTGCTGAGCAGCAAGGGCGTGAGTTTTCAGGAGTTGCCGATCG
ATGGCAATGCCGCTAAGCGTGAAGAGATGATCAAACGCAGCGGTCGCACCACGGTTCCACAGATTTTTAT
TGACGCACAGCACATTGGTGGCTGTGATGACTTGTATGCATTGGATGCACGTGGTGGACTGGATCCCCTG
CTGAAATAACGTGTGAACGTTGGCATTACATTGCGCAGTATTTTAAGGACAACACTTAAGGGTTTTCTAC
ACATGTCAGAACAAAACAACACCGAAATGACTTTCCAGATCCAACGTATTTATACCAAGGATATTTCTTT
CGAAGCGCCGAACGCGCCGCACGTTTTCCAGAAAGATTGGCAACCAGAAGTTAAACTTGATCTGGATACG
GCATCTACTCAACTGGCAGATGACGTTTACGAAGTGGTACTGCGTGTTACCGTAACGGCCTCCCTGGGCG
AAGAAACCGCGTTCCTGTGTGAAGTTCAGCAGGGCGGTATTTTCTCCATCGCGGGTATCGAAGGCACCCA
GATGGCACATTGCCTGGGCGCATACTGCCCGAACATTCTGTTCCCGTATGCTCGTGAGTGCATCACCAGC
ATGGTATCCCGCGGTACATTCCCGCAACTGAACCTTGCGCCGGTTAACTTCGATGCGCTGTTCATGAACT
ATTTGCAGCAGCAGGCTGGCGAAGGTACTGAAGAACATCAGGATGCCTGATGAACCAACGTAATGCTTCA
ATGACTGTGATCGGTGCCGGCTCGTACGGCACCGCTCTTGCCATTACCCTGGCAAGAAATGGCCACGAGG
TTGTCCTCTGGGGCCATGACCCTGAACATATCGCAACGCTTGAACGCGACCGCTGTAACGCCGCGTTTCT
CCCCGATGTGCCTTTTCCCGATACGCTCCATCTTGAAAGCGATCTCGCCACTGCGCTGGCAGCCAGCCGT
AATATTCTCGTCGTCGTACCCAGCCATGTCTTTGGTGAAGTGCTGCGCCAGATTAAACCGCTGATGCGTC
CTGATGCGCGTCTGGTGTGGGCGACCAAAGGGCTGGAAGCAGAAACCGGACGTCTGTTACAGGACGTGGC
GCGTGAGGCCTTAGGCGATCAAATTCCGCTGGCGGTTATCTCTGGCCCAACGTTTGCGAAAGAACTGGCG
GCAGGTTTACCGACGGCCATTTCGCTGGCCTCGACGGACCAGACCTTTGCCGATGACCTCCAGCAATTGC
TGCACTGTGGCAAAAGTTTCCGCGTTTACAGCAACCCGGATTTCATCGGTGTGCAGCTTGGCGGTGCGGT
GAAAAACGTCATTGCCATTGGCGCGGGGATGTCCGACGGTATCGGTTTTGGCGCGAATGCGCGTACGGCG
CTGATCACCCGTGGACTGGCTGAAATGTCGCGTCTTGGCGCGGCGCTGGGTGCCGATCCTGCCACCTTTA
TGGGCATGGCGGGGCTGGGTGATCTGGTGCTTACCTGTACCGACAACCAGTCGCGTAACCGCCGTTTTGG
CATGATGCTCGGTCAGGGCATGGATGTACAAAGCGCGCAGGAGAAAATTGGTCAAGTGGTGGAAGGCTAC
CGCAATACGAAAGAAGTCCGCGAACTGGCGCATCGCTTCGGCGTTGAAATGCCAATAACCGAGGAAATTT
ATCAAGTATTATATTGCGGAAAAAACGCGCGCGAGGCAGCATTGACTTTACTAGGTCGTGCACGCAAGGA
CGAGCGCAGCAGCCACTAAACCCAGGGAACCTTTGTTACCACTATGACCCGGCCCGCGCAGAACGGGTCG
GTCATTATCTTATCGTGTGGAGTAAGCAATGTCGTGTGAAGAACTGGAAATTGTCTGGAACAATATTAAA
GCTGAAGCCAGAACGCTGGCGGACTGTGAGCCAATGCTGGCTAGTTTTTACCACGCGACGCTACTCAAGC
ACGAAAACCTTGGCAGTGCACTGAGCTACATGCTGGCGAACAAGCTGTCATCGCCCATTATGCCGGCTAT
TGCTATCCGTGAAGTGGTGGAAGAAGCCTACGCCGCCGACCCGGAAATGATCGCCTCTGCGGCCTGTGAT
ATTCAGGCGGTGCGTACCCGTGACCCGGCGGTGGATAAATACTCAACCCCGTTGCTATACCTGAAGGGTT
TTCATGCTTTGCAGGCGTATCGCATCGGTCACTGGTTGTGGAATCAGGGGCGTCGCGCACTGGCAATCTT
TCTGCAAAACCAGGTTTCTGTGACGTTCCAGGTTGATATACACCCGGCAGCAAAAATTGGTCGCGGTATC
ATGCTCGACCACGCGACAGGCATCGTCGTTGGTGAAACGGCGGTGATTGAAAACGACGTATCGATTCTGC
AATCTGTGACGCTTGGCGGTACGGGTAAATCTGGTGGTGACCGTCACCCGAAAATTCGTGAAGGCGTGAT
GATTGGCGCGGGCGCGAAAATTCTCGGTAATATTGAAGTTGGGCGCGGCGCGAAGATTGGCGCAGGTTCC
GTGGTGTTGCAACCGGTGCCGCCACATACCACCGCCGCTGGCGTTCCGGCACGCATTGTCGGTAAACCAG
ACAGCGATAAGCCATCAATGGATATGGACCAGCACTTCAACGGTATTAACCATACGTTTGAGTATGGTGA
TGGGATCTGATGTCCTGTGATCGTGCCGGATGCGATGTAATCATCTATCCGGCCTACAGTAACTAATCTC
TCAACACCGCTCCCGGATACCCCAACTGCCGCCAGGCTTCATACACCACGACCGACACCGCATTGGACAG
GTTCATGCTGCGGCTGTCCGGCACCATTGGAATACGAATTTTTTGTTCAGCGGGCAGGGCATCAAGAATG
CTCGCTGGCAGGCCGCGTGTTTCCGGGCCGAACATCAGATAATCGCCATCCTGATAGCTTACGGCGCTGT
GAGCAGGCGTACCTTTCGTGGTGAGGGCAAACAGGCGCTGGGGATTTTCTGCTTCGAGAAACGCGCGATA
GTCATGATGACGCGTAACGGCGGTAAACTCGTGATAGTCCAGCCCCGCGCGGCGCAGGCGCTTATCGTCC
CAGGCAAATCCCATCGGTTCGATGATATGCAGACGAAAGCCGGTATTAGCGCAAAGACGGATGATGTTGC
CAGTATTTGGCGGAATTTCTGGTTCGTAAAGTACGATGTTTAGCATACTGCCCCCTTAGTGCGGGGGCAG
GATAGCAGATATTCGTCTAACCCTTAAGCTGCATTCCCTTTCGCCATTGGAGCCAGTGCCGCAGGCAACT
CTTTACCCAGCCCCTGCACCAGCGAATCTTGCGTAATTTCGCTAATCGATTTCGCGCCAGTCAGCGTCAT
CGCCACTTTCATCTCTTTTTCGATCAGATTTAGCAGATTAGCTACACCCGCCTGGCCCGCTGTTGCCAGT
GCATACAGGAAAGCACGACCCAGCAGTACGGTGTCGGCACCGAGCGCAATCATACGCACGACATCAAGCC
CGTTACGTATTCCGCTATCCGCCAGAATGGCGATATCACCTTTCACCGCATCCGCAATAGCAGGCAGTGC
ACGAGCAGAAGAGAGTACGCCATCTAACTGGCGGCCACCGTGGTTAGAAACCACAATTCCATCTGCACCA
AAACGTACTGCATCGCGCGCATCTTCCGGATCGAGGATCCCTTTGATCACCATCGGGCCATCCCAGAAAT
CGCGGATCCACTCAAGGTCTTTCCATGAGATGGACGGATCGAAGTTATTCCCCAGCCAGCCGATGTAATC
TTCCAGTCCGGTTGGTTTGCCGAGGTAAGCCGAGATATTACCTAAATCATGCGGACGACCGTTCAGGCCC
ACATCCCACGCCCATTGCGGATGCGTCACCGCCTGCAAGTAGCGGCGCATTGCCGCGTTCGGGCCGCTCA
TCCCAGAATGCGCATCACGATAACGCGCTCCCGGTGTTGGCATATCCACGGTGAAAACCAGTGTCGAACA
ACCCGCTGCTTTTGCTCGCTCCAGTGCGTTACGCATAAAGCCGCGATCGCGCAGCACATAAAGCTGGAAC
CACATCGGACGTTTGATAGCTGGAGCGACTTCTTCAATCGGGCAAACGGAAACCGTCGAGAGAGTAAACG
GAATGCCATGCGCATCCGCGGCTTTGGCAGCCTGAACTTCGCCGCGTCGCGCATACATGCCACACAAACC
TACCGGACCTAGCGCCACCGGCATCGACAGTTTCTCATTAAACAGCGTCGTTTCCAGGCTTAAGTCAGAC
ATGTTTTTCAGAATACGCTGGCGCAGCGCCACTTCTGACAAATCTTCCACGTTGCGGTGCAGCGTGTATT
CAGAATATGCCCCCCCATCCATATAGTGGAACAGGAACGGCGGCAGAATGCGTTGCGCTGCGGCGCGATA
ATCGCTGGCTGCGGAAATAATCATGCGTTTTTCTCCCTCGAATGCTCATTATGGTCACCAGGCAGGCGGG
TAATGCGTGCATGGCGAGCCTGATCTTCATCGAATCGTTTCATGGTGGTGTGAACAAAGCTAAGGTGCGC
CATCATTGCTTTACGCGCCCCGTCAGCATCACCGGCAAAAATGGCGTCAATGACCGCCTGATGTTGTTCG
GTCAGCTGTGAAAAAACCGGGGGTACCAGGTACATCCGCTGGCGGCTATGCTTCACAGAGGATTGCAGGA
CATCGAAGAAACCGCGCATGGTTTGCAGCAGCACGATGTTATGTGAGGCTTCGGCAATCGCCAGATGAAA
ACGAACGTCCGCTTGTGAGGCGAGATCCGGGTCTTCGCTGAGCGTTGCTTCAAAACAAAGCTGAATCTTT
TCTTTTTCGCCAGGCGTGGCACGCATTGCTGCATGCCATGCGGTGCTGGCTTCAATGGCGTAGCGGGCTT
CCAGAATATCGAAACTGTAATCCGGATCATCGGCCATCAGCGTTTTCAGCGGCTGGACGATGTTTTGCTC
CGACCATGTGTCATGACGCCAGCGAATAAACGTCCCGCCGCCGCGTCGACTAAGCAGCACGCCTTCGCTC
ACCAGTTTTGCCAGCGCCTCGCGCAGTGAATTACGCGATACGCCGAGTTGCATCGCCAGTTGACGTTCAG
CGGGCAACTTCATGCCCGCCTCCAGGTTTTTTTCATCAATCAGCGCCCGCACACGATCGGCAACCTCGTC
TGACAGGCGTCTGGGTAAAACAATCATTAAGGAATCATCCACGTTAAGACATAAGCCTGAAGCGTGGTGA
TCACGCCCACCATACAGGTGAAGATCAGGCTGTGTTTGACGGTAAAGCGGAACAGATCTGACTCTTTGCC
TACCAGGCCTACCGCCGCACAGGCGATAGCGATAGATTGCGGAGAGATCATCTTACCGGTGACACCACCG
GTGGTGTTGGCGGCAACCAACAACAGGTCAGAAACGCCAATTTGTTGTGCTGCAGTGGCTTGCAGCGCGG
CGAACAGGGCGTTAGATGAGGTATCCGATCCGGTCAGGAAGACACCAAGCCAGCCGAGGAACGGCGAGAA
GAAGGTGAATGCATGGCCGGTGTGCGCCAGTGCCAGCGCCAGCGTTGATGATAGTCCGGAATAGTTCGAG
ATAAAGGCGAACGCCAGCACCATGCCGATGGAGTAGATAGGCAGAGCCAGTTCTTTCAGCGTGCTGCCGA
AGGTGCTGATAGCGTCAGATGGTTTCATCTTCAGCCAGACAATCGAGAGCAGGGCAGCAAACAGAATGGC
GGTGCCGGTGGCAGAGAACCAGTCAAACTTAAACACGGCGGCATACGCTGTCGCTTCGCTGACCACTGGC
GGCATACGGGCAACCAGTTTATCGAGGTACGGCACCGGAATGTTGATCACCCACTCATACAGCGCACCGC
CTGAAGCGAACAGGGCTTTAAACGGCGGGATACTCCACAGCGTTACGGTGGCGGTCAGGAACAGGAACGG
TGTCCAGGCGCGCAGCACCTGACCTGCCGTGTAACCTGTGTGAGCCAGCGTCATATCAACCTGTGACGCC
CCTAAGTCACCGAAGCGGAATACGCGAACTGGTTGCCAGCGTTTGAGGAACAGTGTCAGACAGAGCAGCG
ATACCAGCGAAGAGATAATGTCTGGCAGTTCCGGCCCAATGAAGTTGGAACTGAGGTACTGAGCGATGGC
AAACGAACCACCCGCAACCACGACCGCAGGCCAGGTTTCTTTGATACCGCGCCAGCCGTCCATAATCGCC
ATGATCCAGAACAGCACGATAATGGTCATAAACGGCAGCTGACGCCCCACCATCTGACCAATCTCAAAGC
TGTCGATGCCTGTTACCTGGCCGGCAACCAGGATTGGAATGCCCATCGCACCAAATGCCACTGGCGCGGT
GTTAACAATCAGGCACAGCCCGGCGGCGTACAGTGGTTTAAAGCCCAGACCGACCAGCAATGCGGCGGTA
ATTGCTACCGGTGCGCCAAAGCCTGCGGCTCCTTCAAGGAAAGCGCCGAAACAGAAACCGACGATCAGCA
TTTGCAGGCGCTGGTCAGGGGTTATCGAAAGAATAGACGAGCGAATGATGTCAAACTGCCCGGTTTTCAC
CGAGATCTTATAGACGAACACCGCTGCAATAATGATCCACGCGATGGGCCACAACCCGTAGAAGAAGCCA
TAAACCACCGAGGCCAGCGCGTTAGCGACCGGCATTTTATAGAACAGCAAAGCCACGGCAAGGGCGATTG
CCACCGTCCATGAGGCGGCGACGTATCCTTTCAGTTTGAGCTTAATCAGCGCAAAGAAGAAAAACAGGAT
GGGAAGCGATGCTATCAGGCTGGAAAGCCAGATATTCCCGGCGGGATCGTAGTTTTGTTGCCAGAGATTC
ATTGCAGGTCTCCTGCAGTCCACACACGCCGTGTAATGAGTCTGTTGCTCATCTCCTTGTCACACGTTGT
GTAAAAGTGGCACTGCCAATTGTGTTGTGTAGGGATAATGACAATGGATGGTTAACTAAATGTTATGCAT
TGGCAACATTGATGTGAGTTTTAATTGGGGAATTGTGAACCAGAGGTCAGATCAATGAAGAATTGGTAGG
GCCAATCCTGGGAGAGAGGTAATGAAGAAAAGGGCAATTCCCATCAGAGAGTTGCCCTCAGATTGTTGAT
CTGGTGCGCCTTATCTTGCCGGATGCGGCGTGAACGCCTTATCAGGCCTACAGGGTAGTGCTGAATCACC
CCGTAGGCCTGATAAGCGTAGCGCATCAGGCAATGTGGCGTTTACCCATTCGTTAATGGATGATTACCAC
TGAATACCGGCACCGAGTGCGGCGGAGTATTCACCCTGGCTATTGGTACTACCTTGTAATTTGTAGACCC
AACGACCATTGGCGCTCACCATCGACACACCTAAAGCAACAGCCGATTCACCGTTGTAAGTACCGCCACC
AATAGACGCCATGCTGGCACCCGGCGTGTAAGCCTGCGGCAGACCGGTCATCGCCATTGCAGAAGCGATA
CCACCACTCAGCTTGCTTTCAGTTTTGGACAGTTTGTTATCCATCTCAACCATGCGCTGATCGGTGTATT
GCTTCGTTTCCTGCACACTTTGCTTCAACTGCGCGTAGTTCACCGCGTCGTTGTTATTCACGCCAGCAGA
AACGTTGCTGATGCGAGTCGTACCGCCGTTACCACCACCGAGAGTGATGTTGCTGTAGTCGATAGAGCCA
TCAGCTTTGGTGTCGTAGCGAACGCCGCCTGCTTCAGAAGACTTCAGTTGCGAAACGTTAACCGCATCGG
TGGCATTAACACCGGCAGCAACGTTGGTGATACGGCGCTGGTTGGTAGAAGAACCCACAGAGATGGTATT
TTCTTCGTTGGCCACGGAGCCTGTACCCAGCGCGACGCTGTTGTCAGCGGCAGCAATGGAACCAGAACCA
ATCGCAACACTGTCTTTACCCTGCGCGTTGGCATCTACGCCATCGGTGTTGGTCTTGAAGTATTTGGTGC
TACCGGTGGTTACGATATCGCCAATGCCGTTTTCTATATTGGTCACGCGAGTATCCAGATTAGTGACCTG
AGTGTTCAGGTTAGTAATGCTCTGGGTATTCTGGGAAACCTGCGCGTCCGTTACTTTCAACTGACCCACG
TTAACCGCATCGGTATCCGCCGACCCCGCTGCGACGTTGGTGATCTGACGTTGACCGTCTTCACTGCCGA
CAGAGAACTCACCCACAGAGTTCTGCGGTGCATCCATGTTGTAGGCAGTGTAGTTGGTCTGCGCACCACG
AGTAGTCTGAGAACCATTACCCATAGCAATGCTGTCGGCATGATTTGCGCGTGCGTTAGAACCGATAGCA
ATACCGTTGATCGCATCAGCCAGAACTAAAGTGTTCAGGCCGATACCAATACCCGCATTACCATTAACGA
TGGTTTTCGCGCCCATTGCCAGCGAGTCTTCACCGACTGCCAGTGAGTCTTCAGCCGTTGAGTTAGCGTG
ATAGTATTTGGTTGGTGTGGTTGCTACTGCACCAATGGCGTTTTGCAACTGGCGAACAGTAACAGCGTCA
TGGGCTTCAGAACCATCCGCGACGTTGATGATTTGACGATATTTACCATCATCACCGATCGACAATGCGC
CAAGCAGTTCGCCATCCGTGGTGTCATAACCAATCACAACACCTTCTTCCGATACGCTCGTGTTACGAGA
ACCTTTAACAATCACGCGGCTGGAGACGGATTCGCTACCCAGCGCAATACTCGTCTCAACGCCGCTGTAG
CTGCCCTGACCGATGGCCACGCTACTATGGCCTTCGGCAAAAGAGTTATAACCCATGGCCACGCTGTTAT
CGCCTTTGGCAACAGTGTTATACCCCACAGCGGTAGAGCCAATACCTGCTGCGCTGGCATCGGTGAAGGT
TAAACCGGTGTCATTGGTACGCACATAGTTAATACTTGCACCATTTTCTTCGATGTAGGTTTCACTGGTG
TTACCGGCAAGCTGATTGATGACTTCGCTGTTCTGCTGGATCAGCATATTGGTGTTAAACAGCTGAGAAC
CGTTGATAGCATCGGTGCTACCTTCACCAATGTTACCATCAGCAACGTTTGTGATAATGCTGGCCTTGCC
GTCATGACTGGCGTTGTAAGCCCCTTCGCCGTTATTGGCGGTCGCATCCCACAGCAGCGCGTTCTCATCA
AGCGCATCCAGAGCTTCACCGACGTTGTTGTAATCGGTATTTGCAATGGTGTAAGTCGGTGCAGTGATAG
TTCCGTCAGCGTTGACTTCTGCATCACCACCCAGCGCATCAGCGATGTACTTATTGGTGGTATAGAGTTG
TGAGCCGTTAATCGCGTCGCTGCTGGTGGCAGAGATTGCACCATTTGCGACGTTAGTAATCTTACTGGCG
GTGTTATCTACCCCGCGACCGGCGCTGAATGCACCAGCACCGTCATTGGCTGTCGCATCCCAGAGCAGAG
CATCACCGAGAGAATCACTAAATGAAGTGTTAATTGCGGCCAGAGCATCACCGACGTTAGTGTAGTCAGT
GCCGCCAATACTATAGGTTGGCCCGGTTAATACACCTGTATCGCTAATATCAGCACCACCACCCAGATAG
GACGTGAATGAATCAGCCAAACCATATAGTTGTGAGCCATTTATGGCGTCAGTGCTGTCAGAGGAGACTA
TGCCAGCTTGTACGTTGCTGATTTTGTTGGTGGCGTTAGTACCGTGTGCAGCGGTGAATGCGCCTGCGGC
GTCGTCCCATTTCAGGGCGTCTTCACCGAGATTATTCACCGTATCAGTCAGGTTAGTGATATTGGTGGTG
TTAGTGGCGATATTGGTGGTGTTGGTCGCCACGTTATCGTTGGTGATTTTGCTGGTAGCTTCACTACCGT
GTGCGGCACTGAATGCTGTGCCGTTCCACAACAGGGCATCCTGCTGCAGGTCGTACAATTGAGAGCCGTT
TACTACATCGGTGCGGGTTGCAGAAACCGTACCTTTAGCAACATTAGTGATTTTGTTGGTGGCATTTGCA
CCGTGATTGGCGCTGAACGCCCCCGCGGTTTTATTCCATTGTAGGGTATTATTGTCGATTCCTGACAGAG
CATCACCCACGTTATTATAGGTTCCGCTTCTCAACGCGTAGCTTACTGCGCTTATGCTGCCATCGTTGCC
TACAGTAGTACAGTAGCGCCTCCCCCGAGCCGTTTGGCGACTGAATCACTGATCGTATAAAGCTGTGAGC
CGTTGATGGCATCGGCACTGGTGCAGCTTATGGCACCAGCAGCCATATTAGCAATTTTGCGTTTTGTTGT
GCTGTTGCCAACTGAAACCGTATTGCTTGCATCTGTGGTCGATCCTGCGCCGATAGCGACAGAATTGTCG
GTCGCTGCTGCAGCCCCTACACCGATAGCGACAGAATCATTGCCGTTTGCCCTGGACTGGCTACCGAAAG
CAAGGCTGTTGCTGCCACCAGCGGCACTACCCTCTCACAATGCGATGGCATTTTCTCCTGCAGACGAACT
GTTACTGCCCAACGCGATTGAGTTCACTTTGCTTGCAATGCTGCCTTGCCCCAGCGCAATCGCATTTTGT
TCGCTGGCTTCACTTGTGTTACCTAATGCAATACTGGATTCGCCAGATGCCTGACTTGCGTTACCCAGGG
CCGTCGAATTTATTCCCAGGGCTTGCGCTTTGTTCCCAATCGCGATGGCGTTATCGTTCAAACTGCGACT
GTCTGCCCCCATCGCAATAGCGTTCGCTGCGCTGGCGAGTGATAGTCTGCCAAATGCAAAGCTGTCAAGA
GCACTCGCATTTGCCTCTGAACCAAATGCCAGGCTATACATACCTGCTGCTTTGGCCTTGTATCCAAGAC
TGGCGGCATAATCAGCGCCATCTTCGACTCTTGAGTCTCTGCCTATTGCGGTGGAATAGAGACCTCCAGT
ATAGGTAGCTCCTCCCAGAGCAAGAGAAAAGTCCGCAATGGCATTCGCACCGCTACCGAATGCTGTGGAT
CGGTTTCCCGCAGCTATTGATTGTTGACCAATTGCAATTGCGCGATCGCCCGATGAGTGGCTTTTATAGC
CGAATGCAGTACTCCCCTCTCCATCTGCTAGTGCCTGTAGCCCTATCGCCATGGCCGTACCCGAAACAGT
CTTTGTTGTTGCCCTGGCACCTTCACCAATTGCAAGCCAGTTATCGCCTTCTATTGGAGATTCAATACCT
TCCCCTCCATCAAGTGCCAACTCCGCACTCGCCCCAAATGACGACAACAACCCACCCGCAACCAGTGCAG
AAATTAATAGCTTACTGCGCCCGCTTTTTTTACTACGGCTCTTCGCCGTTTCGCTGGCAACGGTGTAACT
GCCTGTTGCCGGATTCCAGATAACTTTAAATATTTTATTCATTATTGATGCTCTCTATTCCTTGATATAA
GCGCAGAAGCTGCATTTATTTTTTGTTTTTCCGCTGCCGGGTTTCAGCAGGTTGAACAGTATTGAACTGG
AGATTAGCCATATTGATGGACAACTTCAGATACTTCAGGTTATTAGGCGAGACGCCTTTTAATGTCAGAT
TAATGTCTTGCCATTGACCAGGCATTAATTGCAGAGTGGAATTCAGGGTGGTGTTGAAAAGTAATTGTTG
CCATTTCGCCAGTGCTTTGGCATCGGTGGGTTTTTCATTACCCCATGTTGCATGAAAGCCAATATTTGAT
ACGGGAACACTTAATAGGTTGACCAGCGAAATACGAATAAAACTGCCATTTTCAACCGCATCAATAGCCA
GCATCCGGCCTGCCAAACCAACAGAGCCGTTATTTAAAATAAAGTATTGGGTTTGTGCCGGGTTAAATTC
TGTAAAGACAAATTCGTCCTGTTTGTCTTTGACTGTCTTTACAATGTTGGCAAGTATTCTGGTGCTGTTT
GTGATGTTATTTTGTTGTTTTTAAAATAGTTCTGCTCTGTGTTTATATTGTTCTTGTTGTTTCTCAAGCG
CCTCTATTTTACTTTTTTGCAACTCTTGCTGTTTGGCGAGATCATCGATCAGACTCGCTTTTTCAATATA
ATCACAGTATTGTTAACACCTTTAAGAGTGTCTTTATGTTCATAGGATGAATTCCTTTTCATAACCCAAT
ATGTTGATAATTACGCCATAAACATTCTTCTAGTGAATGTTTGTTTGTATATATATCCGCAATAAAAATT
TATAAGATAATTGGTATTGCGAACGTTTTATTAAATAACAGATTATTTCAGTTTGTAGCGAATAATATGA
GTCGCGCGGATTTTAATGAGCGGTATCAATCAATGTCAAATGTTTAGTGTCTTAGGCTAAGGAGCGCAGG
GAGATTTTGCATTCATATAAATGATGCGTTGTGATGAAATTTGCTGTGTTTATGGGGGAATATAAATAAT
TACGCATCAGGATATGACGATTTATTTCTATAATTTATATATCACTTGTTGTTGCGCAACAAATTTTCAG
ATTTTAGCCTGCAAAAATACCTCAAACGCGTGGGGAAACTGGAACAGTTTATGGTAAGAAAGACATCGTA
TTTGATGAGTAGTACATGCTCCTGCATGTGCTAGCAGGAGCGAGTAAATCGTGAGAGGCTGTGATTACAG
CGACGAGAAAGGAACTTAAAACGCAGTCTTTGAGAACCCTGTCATCTCTTGCAGGCCCATTTCACGGCCC
AGCGCGGTCATTGGGTGCACAACCACCAGTCCGCGAACACTTTTTTTCAGCTTGCCCATATCAGCCTGCT
CTTTTTTGGTGATTGCACGCTGGAACGGCATCTTCATCAGTTTCTGCGCTTCTTTGCTGAGTTTCTGGCT
GTGAACTTCGCGCAGTCGAGCAATTTCGGCTTCCAGAGTGGCTTTCTCTTTTTCCAGCTCGGCATATTTG
TCTGCGGCTTCAACCAGCGATAGATCGGCCTGCTGGTGACGGATGGCGTCCAGACGATCGCTGAGACGTT
TGATTTCGTTTTTTTCGACTTCTTTCATGTGATGACTTCTGATAAAGATAAATTTATAGCCTCTAGTATG
CGCGACCAGGTGCTTTGTTCACAACTGATGGCATTGTAATAGTTCCAGATTGTAACCATTAATGCGTTAA
AAAATCACCCAATACATTGATTAGTTAAGAAATTTAAAGAAAAAAGATAGTCAACAGAAGCAGGCGATTA
TTGAGGATTGAGCACGTTTTCCTTAATGTCATTTATACCGGGATCTAAACTAAAATTGGCGGCCGCGCAT
TCCCGGCGCGGGGTAATACGGAGATATCATCATGGGCAAATTAGGTGAAAACGTTCCGCTTCTTATCGAT
AAAGCCGTAGATTTCATGGCATCCAGCCAGGCGTTCCGGGAGTATCTGAAAAAACTACCTCCCCGTAACG
CGATTCCGTCCGGAATACCTGATGAAAGCGTGCCGTTATATCTACAACGTCTGGAGTATTATCGTCAGCT
TTATCGTCCGAAACAGGTAGAGGAGAAGTAAGCGAAAGTACTTACTTTTGAAAGGCTTTTTTTAAGCTGA
TTTTGGAAATCAGCTCTGTCAGTGAAAGGACCATTGTTGATCGCACAGCCTGTTGGTAACGCTGAATTTG
CATTGCATACAAACTGGAGTCTGCTGGTTCAAACTGTGGCGGCGGTGGTAACGCCGCCACGCAATGCAGT
TCACCAAAGGGTCCAAGTATTTCGTCGTCGGTAAAAGCGTACTCGTTGCCGTCGTGATTTAGCTCTTCAC
GCAATGCCATCAGCAGTTCCGCATCTTCGTATTCCTGGCGGTTAATGACGCCCAACCCGTAAATGAGTTT
TAAACGCACAGAAAGATCGCCCAGCGGACCATCGCCGTCGAGTAACGGTTCTACAGCATACTTCACCGCG
TAATCGTCTTTGCGGAATACCTGAAGCACCAGAAGATTTACCGCCTCGGTCAAAAGCTCGACGGCGGTGA
TCAGAAAGCTTCGCACGGTTTTGCCAGCATTCAGACGCTCAAGCACACGGTTTTCAAAGGCCTGGGTTTG
TTCCATTGTTGCCTGCATATCTGACAATCTGTTATTCGGGCGCAGGGTATCCTGCGCCTGGTCCACCATT
ATTGCATTGCTTTATAAGCGGTTACCGCCTCGGATACAACCTCGTTGTTGGCATCAAGACCGGAAATCTG
TGCCAGCGCGGCTTGTGGGCCTTTGTCGGCAATCAGCGCTGCCAGTTCCTGAGCCTGCGGATCATCTTCA
CTGCGGAAGTGCATTGCAGCGGCAATACCTTCAATCAGGTTTTTATGTGGCAGACCATATTCCAGGGTTC
CGAGCAGTGGTTTGATCAGACGGTCACCAGCACTCAGTTTACGCAGCGGCTGACGGCCTACGCGTTCTAC
ATCATCTTTCAGGTATGGGTTCTCGAAACGACCGAGGATTTTCTGGATGTATGCCGCATGTTTGTCAGCA
TCAAAGCCGTAGCGCTTGATCAGTACCGCGCCGCTTTCTTCCATTGCCCCTTTTACCACCGCGCGGATTT
TCTCGTCGAGAATTGCGTCACGAATGGTCTGATGACCGGCCAGTTTTCCGAGGTACGCGGTTATAGCATG
ACCTGTATTCAGGGTGAAGAGTTTACGTTCGACAAATGCCATCAGATTGTCGGTTAATTCCATGCCAGGG
ATGTTTGGCAGCGTGCCTTTGAACTGCGTTTTATCGACAATCCATTCGCTGAAGGTTTCTACCGTCACTT
CCAGCGGATCGTTAGTTGCCGAAGCCGAAGGCGGTACGATGCGGTCAACGGCGGAATCAACAAAGCCAAC
GTGTTCTTCTACCCACGCTTTGGCATCTTCCGGCAGGGCGTTCATCACATGGCCTTTCAGCTGCGTGGTG
CCGCGGACCATGTTTTCACAGGCGATGATGTTCAGTGGGGATTCATTACCTTGTTCTTTACGTTTCACCA
GCCCTTTGGCGATGGCCGGAGCAATACGTTCCAGCACGACAGGGCCAACGGCGGTAGTGACTAAATCGAC
CTGAGCAATCAGATCAACGACATCATCGCCAATGCTGCTGACGGCATCGACGCCAGAAACGGTATCTACC
TGCTCGGTTTCACCAACCACATGAACCTGATAGCTATGACGGGCATTCAGGGCATCAAGTACCACCTGAT
TTACATCGGCAAACGTCAGTTGGATACCCGCGTCCGCCAGCAGTTTACCGATAAAGCCACGACCGATATT
ACCTGCGCCAAAATGTAATGCTTTCATAGTATTAACCTTCATCAATGTTTTTACCCGAGAGGGCTGGGGT
GAGGCTTTTCCCTCACCCAAACCCTCTCCGTGAGGAGAGGGGCTTTTTGCCGGATGCGGCGTAAACGCCT
TATCCGACCGACAAAACAAATTGTGCTTTATGTTGTAGGCCTGATAAGCGAAGCGCATCAGGCAATTAGC
CCCACCTTCTCCATGCGGAGAGGGTGGGTATGGATTACTTACGACCTGCCAGCAGTTCCAGCACTTCATC
CACACTGGTGGTGTGCGCCAGACGCTCGATAACTGACTCATCATCCAGTGCGTTGGTCAGGCTGGTGATC
ACCTGAATGTGCTCGTTGTTACGGGCAGCAATACCAATTACCAGACGGGCAATGTCATCTTCTTCTTCAC
CGAAGCGCACGCCTTCCGGGTACTGGCAGAACACCACGCCCGTTTTCAGTACGCGATCTTTCGCTTCAAC
CGTACCGTGCGGCACCGCGATAGACTCACCCAGATAAGTCGGGGTCAGTTTTTCACGATCCAACATCGCC
TGAACGTATTCCGGCTCAACGTAACCGCCTTTCACTAGCTGCTCGCCAGCAAAACGAATCGCTTCTTCTT
TGGTGGCCGCTTTGCGACCGAGGAAGATGTTCTCCGCGCCCAGTTTGAACAGGTTAGCACTGGAATCGTC
AAAGCTGTCTTTCAGACTGTCTTTCACTTTCACTTCGTTTTCAGTATGGCGCTGGGCAGCAACCAGACGT
TCGGTCAGGCTGGTGTACAGGCCGCTGTCGAGGAAGTTGGTCAGCGAAATATGCTGTGCCTGCGGAACCT
GGCGCATAGCGCGTTCGGTCAGGTCACGGTGAGTGATGACCAGGTCCACATCTGGCGGCAGGTTGTTGAT
CGCGCTGTTAGTGACCGAAATCTGCGACAGACCTGCATCCTGAATTTTCTTACGCAGCACGCCTGCACCC
ATCGCACTGGAACCCATACCGGCATCACAGGCAACGATGATTTTACGGACGTGGCTCAGGTCGTTAGTCA
CATCGCCCGCAGACAGCGGAGATGCGCCTTTAGACTCAGCTTTCATTTCCTGAACGCGACGTGCAGCAGC
TTCAATATCATCTTCTTCTTTCACTTTGCTGGTTTTCAGCAGAATGGCAGAGACAACGAAGGAGACTGCC
ATCGCCGCACACACACCCGCGATGTTAGCGAAGTAAGCACCTTTTGGCGTCATCGCCAGTACAGCAAGGA
TAGAACCCGGAGATGCCGGAGAAACCAGCCCACCGCCCAGGATAGTCAGCGTGAACACGCCAGTCATACC
GCCGAGGATAACGGCCAGAATCAGACGCGGATTCATCAGCACATACGGGAAGTAGATTTCGTGGATACCC
CCCAGGAAGTGGATGATTGCCGCACCGCCCGCAGACTGTTTAGCGCTACCACGACCAAAGAACATGTACG
CCAGCAGCACGCCCATACCTGGACCTGGGTTAGCTTCAATCAGGAAGAAGATGGATTTACCCAGTTCATG
GGACTGCTGAATGCCCAGCGGCGAGAAGATACCGTGGTTAATGGCGTTGTTGAGGAACAGGATTTTCGCC
GGTTCAACAAAGATAGACGCCAGCGGCAGCATGTCATGGACAACCATGAAGTTAACGCCCGCAGCCAGCA
TTTTAGACAGGGCTTCAACAACCGGGCCAATGCCGAGAAATGCCAGAATAGCGAGGATCATCCCGATGAT
GCCTGCGGAGAAGTTATTCACCAGCATTTCAAAACCGGATTTGATCTTACCGTCTACCCAGCGGTCGAAG
TGCTTAATGCACCAGCCGCCCAGCGGACCTGCAATCATAGAGCCGAGGAACATCGGCATATCTGCGCCGA
CGATAACGCCCATGGTGGTGATGGCACCGACTACGCCGCCACGTTCGCCGCCTACCAGCTTACCACCGGT
ATAACCGATCAGCAGCGGCAGGAGATAAGTGATCATCGGCCCGACCAGCTTCGCCAGCGTTTCGTTCGGT
AACCACCCTGTTGGAATAAATAACGCGGTGATGATACCCCACGCGATAAACGCGCCGATATTTGGCATCA
CCATGTTGCTGAGGAAACGACCAAAGCTTTGCACTTTGATCTTAATATCGGATGACATAAAAACACCCCT
TCTTATGTTTGCTGTCGCGCAGGCTGGAAGCCCGAGGTTTTTTGTTAATGTGGCGGCAGAGGTAGCCGGA
CCTTGTAGATACTGCGAAATCTGGCACTGAATCGGTTAACTGTCCAGTCGGCGGCCTTTTGTGTGACATC
AGTCACATAAATGTAGGGGGTAGAGAGGTAATTGACGTGATACTCATCACAAAATGCTTGTGTAAAAAAG
CAACAAGGCGGCGATTTTCGCTAAAAATGGCATTTAAATGTGACTTATGTCACATTTTTATTTTGATGGT
TTGTTGAATCTTTGTGATCTGAATCACAAGATATTTTCTTACGGCGTTCACCTGATGTGATCTACAGCAT
GTTATGCCTTCGTCATGAAATCGTTATGTAACTAAGCAACTCATCACCTCTTAAAATTATTCTTTGGTGT
TATGGTGAGAATCGCGAACCCGGATTATTGTCAAAATATCAGCCTGACTCCCTTCTGGCTGCCAGCCAAA
AAACAACACTGATAAACGTGAATCCGAGGCAGATATGTTTCTAAACTATTTCGCGTTGGGAGTGCTGATC
TTCGTCTTTCTGGTGATTTTTTATGGAATCATCGCGATACATGACATCCCTTATCTGATTGCCAAAAAGC
GCAACCATCCCCATGCCGACGCTATTCATACGGCGGGCTGGGTGAGCCTGTTTACTCTGCATGTTATCTG
GCCGTTTTTGTGGATCTGGGCGACGCTCTATCAACCGGAGCGCGGCTGGGGCATGCAGTCGCATGTTGCG
CCGCAAGGCGACGTGCCAGACCCGGAAATCGCCGCACTTTCTGACCGGATTTCCCGGCTGGAGCACCAAC
TCGCCGCCGAGAAAAAGACTGACTATTCCACGTTCCCGGAGATCTAATAATGGATCTATTGATTGTTTTA
ACTTACGTGGCGCTGGCGTGGGCGGTCTTTAAAATCTTCCGCATTCCGGTGAATCAGTGGACGCTGGCGA
CGGCGGCGCTGGGAGGCGTGTTTCTGGTGAGTGGTTTGATTTTGTTGATGAACTACAACCACCCTTACAC
TTTTACCGCGCAAAAGGCAGTGATAGCGATCCCCATCACGCCACAGGTGACGGGAATTGTTACTGAAGTC
ACCGACAAAAATAATCAGCTTATTCAGAAGGGCGAGGTGCTTTTTAAGCTCGACCCGGTTCGTTACCTGG
CGCGAGTTGACAGGCTTCAGGCTGACCTGATGACGGCGACGCATAATATAAAGACGCTGCGCGCGCAGCT
CACTGAAGCGCAGGCCAACACCACCCAGGTTTCAGCGGAGCGCGACCGTCTGTTTAAAAATTATCAACGT
TATCTGAAAGGCAGCCAGGCGGCGGTGAATCCGTTCTCGGAACGTGACATCGACGATGCGCGGCAAAATT
TCCTCGCGCAGGATGCGCTGGTGAAAGGCTCGGTGGCGGAGCAGGCGCAGATCCAGAGCCAGCTCGACAG
TATGGTTAACGGCGAGCAATCGCAGATTGTGAGCTTAAGAGCGCAACTTACAGAAGCAAAATATAACCTT
GAGCAGACCGTCATTCGCGCACCGAGCAATGGCTACGTCACTCAGGTACTGATCCGCCCAGGTACATACG
CAGCTGCCTTGCCGCTGCGTCCGGTGATGGTCTTCATCCCCGAGCAAAAACGGCAAGTTGTCGCCCAATT
TCGGCAAAACTCGCTGTTACGTCTGAAACCCGGCGATGATGCGGAAGTGGTGTTTAACGCGCTACCTGGG
CAGGTGTTCCACGGCAAACTGACCAGCATTTTACCTGTCGTGCCAGGCGGTTCTTATCAGGCGCAGGGGG
TATTGCAATCATTAACGGTCGTGCCCGGCACGGACGGTGTGCTGGGAACCATTGAACTGGACCCTAACGC
TGATATCGATGCCTTACCCGACGGCATCTACGCCCAGGTGGCAGTTTACTCCGACCATTTCAGCCATGTT
TCGGTGATGCGGAAAGTGCTGCTAAGAATGACCAGTTGGATGCATTATCTTTATTTGGATCATTGAGACT
TGTATCACCTGTGTTTTGCGCGAGCCTGAGCCATACTGATATTTTTCCTCGCACAAAGGACTCGGCATGA
AACTCGTCGGTAGCTACACCAGCCCGTTTGTACGCAAACTTTCCATTCTGTTGTTAGAAAAGGGCATAAC
GTTCGAATTTATTAATGAACTGCCCTATAACGCGGATAACGGCGTGGCGCAATTTAACCCGTTAGGAAAA
GTGCCGGTGCTGGTGACCGAAGAGGGCGAATGCTGGTTTGATTCGCCGATCATCGCTGAATATATTGAAT
TAATGAATGTTGCTCCGGCGATGTTGCCGCGTGATCCGCTGGAGTCGTTGCGGGTGCGCAAAATTGAGGC
GCTGGCGGATGGCATTATGGATGCCGGGCTGGTATCGGTGCGTGAACAGGCGCGTCCGGCGGCGCAGCAG
TCTGAAGATGAATTGTTACGTCAGCGTGAGAAAATCAACCGCAGTCTGGATGTGCTGGAAGGATATCTGG
TCGATGGCACACTCAAAACCGATACGGTCAATCTGGCGACTATCGCCATTGCCTGTGCCGTCGGATATCT
CAATTTCCGCCGCGTTGCGCCAGGCTGGTGTGTCGACCGCCCACACTTAGTCAAACTGGTCGAAAACCTG
TTTAGCCGCGAAAGTTTTGCTCGCACCGAACCGCCAAAGGCTTGATGCGCGATATGTCCTCCTGACCCAT
CTCACGTTACAATCCGTGGTTATGTTAAACGCCCTTCTCCGTGTGAGAGGGCCTTGATCAGCCAGGTTTC
CTATGACAACCGAAACGCGTTCCCTCTATAGTCAACTTCCGGCTATTGATCGCTTATTGCGCGATAGCTC
CTTCCTTTCTTTGCGTGATACTTATGGTCACACCCGCGTGGTGGAATTGCTGCGTCAGATGCTTGACGAA
GCGCGAGAAATGATTCGTGACAGCCAGACGCTGCCCGCGTGGTGTGAAAACTGGGCGCAAGAAGTCGATG
CCCGGTTGACGAAAGAGGCGCAAAGCGCGCTGCGTCCGGTGATCAACCTGACGGGAACCGTGCTGCATAC
CAACCTTGGGCGAGCTTTACAGGCGGAAGCCGCGGTGGAAGCCGTTACGAAGGCTATGCGTTCGCCAGTG
ACCCTCGAGTACGATCTGGACGACGCCGGACGCGGACATCGCGATCGGGCGCTGGCGCAGCTGCTGTGCC
GTATTACGGGGGCGGAAGATGCCTGTATCGTTAATAACAATGCGGCGGCGGTGTTATTGATGTTGGCGGC
CACTGCCAGCGGGAAAGAGGTGGTGGTTTCTCGCGGCGAACTGGTGGAGATTGGCGGCGCGTTTCGTATT
CCCGATGTTATGCGTCAGGCAGGATGCACCCTACATGAAGTAGGGACCACCAACCGTACGCACGCGAAGG
ATTATCGTCAGGCGGTGAATGAAAATACCGCACTGTTGATGAAAGTACATACCAGTAACTACAGCATTCA
GGGGTTCACCAAAGCGATAGATGAAGCGGAACTGGTGGCGCTCGGCAAAGAACTGGATGTTCCAGTGGTG
ACTGATTTAGGCAGTGGCTCGCTGGTCGATCTTAGCCAGTACGGTTTGCCGAAAGAGCCAATGCCGCAGG
AGTTGATTGCGGCGGGCGTCAGTCTGGTGAGCTTCTCCGGCGACAAGCTGTTAGGCGGGCCGCAGGCAGG
AATTATTGTTGGTAAAAAAGAGATGATCGCCCGCCTGCAAAGCCACCCGCTGAAGCGTGCATTACGCGCG
GATAAAATGACCCTCGCGGCGCTGGAAGCCACGTTGCGTCTTTATTTACACCCTGAAGCTCTGAGTGAAA
AATTACCGACCCTGCGCCTGCTTACCCGCAGCGCAGAGGTCATTCAAATCCAGGCACAACGTTTACAGGC
TCCCCTTGCCGCACATTACGGCGCGGAGTTTGCGGTACAGGTTATGCCATGTCTTTCGCAGATTGGCAGT
GGTTCGCTGCCGGTTGATCGCCTGCCGAGCGCGGCATTAACGTTTACCCCCCATGATGGACGCGGTAGCC
ACCTTGAGTCATTAGCCGCCCGCTGGCGTGAATTGCCAGTGCCGGTGATTGGTCGTATTTATGACGGACG
ATTGTGGCTGGATTTACGCTGCCTTGAAGATGAGCAACGGTTTTTGGAGATGTTGTTGAAATGATTATTG
CGACTGCCGGACACGTTGACCACGGCAAAACAACCTTGTTGCAGGCGATTACGGGCGTAAATGCCGACCG
TCTGCCGGAAGAAAAAAAGCGCGGCATGACCATCGACCTCGGCTATGCCTACTGGCCGCAGCCGGATGGT
CGCGTGCCTGGTTTTATCGACGTACCCGGTCATGAAAAGTTTCTTTCCAACATGCTGGCGGGCGTTGGTG
GTATCGATCACGCGCTGTTGGTGGTGGCGTGCGATGACGGTGTGATGGCACAGACCCGTGAGCATCTGGC
GATTTTGCAGCTGACCGGTAACCCGATGCTGACAGTGGCGCTGACCAAAGCCGATCGCGTGGACGAAGCG
CGTGTTGATGAGGTTGAACGCCAGGTAAAGGAGGTGCTGCGGGAATACGGTTTTGCTGAGGCAAAACTGT
TTATCACCGCAGCAACCGAAGGTCGGGGAATTGATGCTCTGCGCGAGCATCTGCTTCAGTTACCAGAACG
TGAACACGCCAGCCAACATAGTTTCCGTCTCGCGATCGACCGTGCATTTACCGTAAAAGGTGCCGGGCTG
GTCGTCACCGGTACGGCGTTAAGCGGGGAAGTGAAGGTAGGCGATTCACTATGGCTGACTGGTGTAAATA
AACCGATGCGCGTGCGTGCGCTGCATGCGCAAAATCAGCCAACAGAAACTGCCCATGCCGGTCAGCGTAT
CGCGCTTAACATCGCGGGTGATGCGGAAAAAGAGCAGATTAACCGTGGTGACTGGCTGCTTGCTGATGCG
CCGCCGGAGCCTTTCACACGGGTGATTGTCGAGCTTCAAACCCATACACCGCTGACCCAGTGGCAGCCGC
TGCATATTCACCACGCCGCCAGCCACGTCACGGGACGCGTTTCGCTGCTGGAAGATAACCTTGCCGAGTT
GGTGTTCGACACGCCGCTGTGGCTGGCAGATAACGATCGCTTAGTGCTACGCGATATCTCGGCCCGCAAC
ACGCTGGCGGGGGCGCGCGTGGTGATGCTTAACCCGCCGCGTCGCGGTAAACGTAAGCCGGAATATCTGC
AATGGCTGGCGTCTCTTGCACAGGCGCAGAGCGATGCCGATGCGTTATCTGTTCATCTGGAACGCGGAGC
GGTTAACCTTGCTGATTTCGCCTGGGCGCGCCAGCTCAACGGCGAAGGGATGCGCGAACTGCTGCAACAG
CCTGGCTATATTCAGGCTGGTTATAGCTTGTTGAATGCGCCGGTTGCCGCTCGCTGGCAGCGGAAAATTC
TCGACACATTAGCGACTTATCATGAGCAATATCGCGATGAACCTGGTCCTGGGCGCGAACGTCTGCGACG
TATGGCGTTGCCAATGGAAGATGAAGCGCTGGTACTGTTGCTGATTGAAAAGATGCGCGAAAGCGGCGAC
ATCCTCAGTCATCACGGCTGGCTGCATCTGCCGGATCACAAAGCGGGCTTCAGTGCAGAGCAGCAGGCCA
TCTGGCAAAAAGCAGAGCCGCTGTTTGGTGACGAACCGTGGTGGGTGCGTGATCTGGCAAAAGAGACGGG
AACCGACGAGCAGGCAATGCGCCTGACTCTACGCCAGGCGGCGCAGCAGGGGATAATTACCGCGATCGTT
AAAGATCGTTATTACCGTAACGATCGGATTGTCGAATTTGCCAATATGATCCGCGATCTCGATCAGGAAT
GTGGTTCAACCTGCGCGGCGGATTTCCGCGATCGCTTAGGCGTAGGCCGCAAGCTGGCAATTCAGATTCT
GGAATATTTTGACCGCATTGGCTTTACGCGGCGTCGTGGAAATGATCATTTATTGCGCGACGCATTATTA
TTTCCGGAAAAATAAGGAAATGATTAATTAATTTTTAAAATAAATTAATACAAAATTCTTATGATTTTAA
AAAAGCACATTGTTTAATGAATACAATGTGCTTTTTATTGGATTAATTTTGATAATCAATAATACTGATC
ATATTTTCAAATGAAAATCCTCAGTAAGCTGCCCGCCCTTTTTTACACTTTCAGGAGTGTGTTATGGCAG
CTTCAACCTTTTTTATTCCTTCCGTGAATGTTATTGGTGCTGATTCATTGAATGATGCAATGAATATGAT
GGCAGATTATGGATTTACCCGTACCTTAATTGTCACCGACAACATATTAACGAAATTGGGTATGGCGGGT
GATGTGCAAAAAGCACTGGAAGAACGCAATATTTTTAGCGTTATTTATGATGGCACCCAACCTAACCCCA
CCACGGAAAACGTCGCTGCAGGTTTGAAATTACTTAAAGAAAATAATTGCGATAGCGTGATTTCTTTAGG
CGGTGGTTCTCCACACGACTGCGCAAAAGGTATTGCGCTGGTTGCAGCCAACGGCGGTGACATCCGCGAT
TATGAAGGCGTTGACCGCTCTGCAAAACCGCAGCTGCCGATGATCGCCATCAACACCACGGCGGGTACGG
CCTCTGAAATGACCCGTTTCTGCATCATCACTGACGAAGCGCGTCACATCAAAATGGCGATTGTGGATAA
ACATGTAACTCCGCTGCTTTCTGTCAATGACTCCTCTCTGATGATTGGTATGCCGAAGTCACTGACCGCC
GCAACGGGTATGGATGCCTTAACGCACGCTATCGAAGCGTATGTTTCTATTGCCGCCACGCCGATCACTG
ACGCTTGTGCACTGAAAGCCGTGACCATGATTGCCGAAAACCTGCCGTTAGCCGTTGAAGATGGCAGTAA
TGCGAAAGCGCGTGAAGCAATGGCTTATGCCCAGTTCCTCGCCGGTATGGCGTTCAATAATGCTTCTCTG
GGTTATGTTCATGCGATGGCGCACCAGCTGGGCGGTTTCTACAACCTGCCACACGGTGTATGTAACGCCG
TTTTGCTGCCGCATGTTCAGGTATTCAACAGCAAAGTCGCCGCTGCACGTCTGCGTGATTGTGCCGCTGC
AATGGGCGTGAACGTGACAGGTAAAAACGACGCGGAAGGTGCTGAAGCCTGCATTAACGCCATCCGTGAA
CTGGCGAAGAAAGTGGATATCCCGGCAGGCCTACGCGACCTGAACGTGAAAGAAGAAGATTTCGCGGTTC
TGGCGACTAATGCCCTGAAAGATGCCTGCGGCTTTACTAACCCGATCCAGGCAACTCACGAAGAAATTGT
GGCGATTTATCGCGCAGCGATGTAATCATCATTTCCACAACGGCTGGCGAGTTGTCAGCCGCTTTTTCAA
CTATCTCAAAACTTGCTTTTTTTGAGATAGTTTCTCTTTCCTGCTATACACTATCTCAATATTGCGCTTT
TTTGAGATAAGCACATGGCTATCAAATCACCTCCCGGACTTATTCCTTTATCACACTTATCGGGTGAGGA
ACTCCTGGCCCACCTGCGCTTTAACCGGGTTACCGATGAAAAAGGACGTTATCTGCCTTTTGATGAGTTG
CAGTACCGCATCAAAAAAGGAGAAAACGTCGATGTGGCGTGGACGCTTACCCGTCTGGCGCGCAACGCGG
CGATCCAACGAATTAATTATTGCAATGAAGCGGGTGAACAGGCCGGATTCAACATTACCCCGGTGATTGC
AGAAGCGTGCGAGCTTGTCGACAAACGTGCTACCGCGCTGGCGCTGAAAGATCAGACTGAACGGTTACGC
GGGGCCGGAGCCGAGTTAAGCCAGTTACGCCTGGAAGAGCCGATCACCAGCTCCCAGCTGGAAGGTGCGA
ATACTACAACGCTGGTGGCGAGAAAAATGCTGGAAACAGGGCGGTCGCCACGCACTGAAGACGAGCATAT
GATTGCGGGAAATGCCCGGCTGATGGCGGAAATTCCGCACTTACTCGCAGAACCGCTGACACCTGCGCTT
ATTCGCCAGTTACATGCCATTGGTATGGGTGGAATCAATGACGCGAAATATCGTCCGGGAGAATTTCGTG
AAACAGATGATGTTGTGATCGCCGACTATGATGGCAATATAGTGCATCAACCGCCCGCTGCGGCATTGTT
ACCGGAACGGCTGGAAAAAGTTTGCCAGTGGTTAAACAGCCATGAAGGGTATATTCATCCGTTGGTCCGT
GCCTGCATTCTGCATTTTATGCTGGCCCATGAACATCCGTTTCGGGATGGCAACGGGCGCACCAGTCGGG
CGCTGTTTTACTGGTATATGCTGAAATCGGGCTACGATGTTTTTAAATATATTTCCATCAGCCGTTTGCT
TCATGCAGCGCCAGTAAAATATGCCGCCAGCTACCAGTACACTGAATCAGATGGTATGGATCTGACTTAT
TTCCTTGAATATCAGGCGGGTGTCATTAAACGTGCTCTGCAAAACTGGCAGCAGCATATCGATGAAATTA
CACAACGAAGCGCAAAACTCGATAGTGTGCTGTTTAGCTCTGGTGTGCTTAAACGCCTGAATCCGCGCCA
GGTAACGCTCCTGAATGTGATGCTCGCCAATCCGGGGAAAGAGTACACAGTTGCTGAAATTAGCGCGAGC
TTGGGCGTCTCTGATAATACGGCTCGAGCTGATTTACGGACAATTGTTAAAGAAGGGTTTGCGCAAGAGA
AGAAAATTAATGACCAGCAAGCCGTGTACTTCGCGCATTATCCGCTGTAACCCTTGCCCGTAAATTCGTG
ATAGCCGTCGTAAAGCTGTCACCGACTGGCGAAGATTTCGCCAGTCACGTCTACCCTTGTTATACCTCAC
ACCGCAAGGAGACGATCATGACCAATAATCCCCCTTCAGCACAGATTAAGCCCGGCGAGTATGGTTTCCC
CCTCAAATTAAAAGCCCGCTACGACAACTTTATTGGCGGCGAATGGGTAGCCCCTGCCGACGGCGAGTAT
TACCAGAACCTGACGCCGGTGACCGGGCAGCTACTGTGCGAAGTGGCGTCTTCGGGCAAACGAGACATCG
ATCTGGCGCTGGATGCTGCGCACAAAGTGAAAGATAAATGGGCGCACACCTCGGTGCAGGATCGTGCGGC
GATTCTGTTTAAGATTGCCGATCGAATGGAACAAAACCTTGAACTTTTAGCGACGGCAGAAACCTGGGAT
AACGGTAAACCCATTCGCGAAACCAGTGCTGCCGACGTGCCGCTGGCGATTGATCATTTTCGCTATTTTG
CCTCGTGTATTCGGGCGCAGGAAGGTGGGATCAGTGAAATTGATAGCGAAACCGTGGCCTATCATTTCCA
TGAGCCGTTAGGCGTGGTGGGGCAGATTATCCCGTGGAACTTCCCGCTGCTGATGGCGAGCTGGAAAATG
GCTCCCGCTCTGGCGGCGGGCAACTGTGTGGTGCTGAAACCCGCACGTCTTACTCCGCTTTCTGTACTGC
TGCTAATGGAAATCGTCGGTGATTTACTGCCGCCAGGGGTGGTGAACGTGGTCAATGGCGCAGGTGGGGA
AATTGGCGAATATCTGGCGACCTCGAAACGCATCGCCAAAGTGGCGTTTACTGGCTCAACGGAAGTGGGC
CAACAAATTATGCAATACGCCACGCAAAACATTATTCCGGTGACGCTGGAGCTGGGCGGCAAATCGCCAA
ATATCTTCTTTGCTGATGTGATGGATGAAGAAGATGCCTTTTTCGATAAAGCGCTGGAAGGCTTTGCACT
GTTTGCCTTTAACCAGGGCGAAGTTTGCACCTGTCCAAGCCGTGCTTTAGTGCAGGAGTCTATCTACGAA
CGCTTTATGGAACGCGCTATCCGCCGTGTCGAAAGCATTCGCAGCGGTAACCCGCTCGACAGCGTGACGC
AAATGGGCGCGCAGGTTTCTCACGGGCAACTGGAAACCATCCTCAACTACATTGATATCGGTAAAAAAGA
GGGCGCTGATGTGCTCACCGGCGGGCGACGCAAGCTGCTGGAAGGCGAACTGAAAGACGGCTACTACCTC
GAACCGACGATTCTGTTTGGTCAGAACAATATGCGCGTGTTCCAGGAGGAGATTTTTGGCCCGGTGCTGG
CGGTAACCACCTTCAAAACGATGGAAGAAGCGCTGGAGCTGGCGAACGATACGCAATATGGTCTGGGCGC
GGGCGTCTGGAGCCGCAACGGTAATCTGGCCTATAAGATGGGGCGCGGCATTCAGGCCGGGCGCGTGTGG
ACCAACTGTTATCACGCTTACCCGGCACATGCGGCGTTTGGCGGCTACAAACAATCAGGCATTGGCCGCG
AAACCCACAAAATGATGCTTGAGCATTACCAGCAAACCAAGTGCCTGCTGGTGAGCTACTCGGATAAACC
GTTGGGGCTGTTCTGATGTGAAAGGCTGCCCGGCGTGTATTGCCGGGCACTATCAGGTATGGCTACTGCC
CGTAATAGGCATTGGCCCCATGCTTACGCAGGTAGTGCTTATCCAGCAGTTCGTTTTGCATCGCAGGGCG
CTGTGGCGCAAGCTGGCGCGAGAACAGACCCATATAGGCGCACTCTTCCAGTACCACGGCGTTATGCACC
GCATCGGCGGCATTTTTTCCCCAGGCGAACGGGCCGTGAGAATGCACCAGTACCGCTGGGATTTGTGCCG
GGTTCAACCCACGCTCTTCGAAGGTTTTAATGATCACTTCGCCGGTCTGGTATTCATACTCGCCGTTGAT
CTCTTCTGCGGTCATCAGGCGCGTGCAGGGGATGGCTCCGTAAAAATAATCGGCGTGAGTAGTGCCCCAG
GCGGGGAGATCAAGTCCGGCCTGCGACCAGATGGTGGCGTGGCGCGAGTGGGTATGCACTATGCCGCCAA
TCTCCGCAAAGCGACGGTAAAGCGCCAGATGCGTTGGCGTGTCGGAAGAGGGCTTTTTGCTGCCTTCCAC
CACCTTGCCGCTGGCTATCTCAACCACCACCATATCGTCGGCGGTCATTACCTCATACTCAACGCCGGAA
GGCTTAATCACCATCCATTGCCGCGTTTCGTCCATCGCGCTGACATTGCCCCAGGTGAACGTCACCAGAT
GATGAACGGGAAGCGCCAGGTTTGCCGCCAGCACGTCAGCTTTCAGTTGCTCTAACATATAAATCCGGCC
TCCTGCATACGCGCTTCAATCCAGCGCCGCGCCTGAATAATCTCCAGCACCGGCTCTTTGGCTTTTTCGG
TCCACATTTCAATCAGAAATGATCCGCGATAGTTCAGCTCATGCAGCGTTTTGAAGATGCCAACAAAATC
GACACAGCCTTCGCCAAACGGCACATCGCGGAACTGTCCGGGGCTATGTTCGGTAACGGGTTGAGTGTCT
TTCAGATGGATGGCGGCGATACGGTCGATACCCAGTTTCAGTTCGGCGGGAACATCATTGCCCCAGGCGC
TGAGGTTGCCTACGTCTGGGTAAACGGTGAACCACGGTGACGCAAGCATTTCGTCCCACTTTTTCCATTT
GCTGATAGAGTTCATAAACGCGGTGTCCATAATCTCCACCGCCAGCATGACTTGTGATGCCGCTGCCTGT
TCAACCGCCCACGCAAGCCCTTCAGCAAACCGTTGCTGGGTGCCTTCGTCATGATCCTCGTAATAGACGT
CGTAACCTGCCAGTTGAATAGTACGAATGCCGAGATCGCGCGCCAGGCGAATCGCTTTACTCATAATCTC
CCGCGCCCGCTGGCGCACGGCGTCGTCCCGGCTACCAAAAGGAAAACGACGATGTGCGGACAGGCACATT
GACGGAATAGCAACACCCGTTTCGATCATCGCAGTGACCAGCGAAGCACGTTGTGCGGCGCTCCAGTCAA
GACGTGACAACCGTTCGTCGGTTTCATCCACCGACATTTCGACAAAATCAAAACCACAGCTTTTTGCCAG
CACCAGCCGCTCCGGCCAGGAGAGATCTTTCGCCAGCGCTTTTTCATAAATGCCTAACGGATGATTACGC
ACGCTTGCCTCCCCAGATGGAGTCGATTTGCGCATGAAAATCAGCGGCCACTTGCGCCGGATTTGCTGCG
CCTGCCAGCGCCCGTCCGGCAATAAACGCTTTCACGCGGATCTCTTTAAACAGCGGCAGGTCAGCAGGGG
TAATCCCGCCAGTAATGGAAAGCTCAAGGCCGATATCGGAAAGCGCCTTCATGCGTGCCAGATCGGCCTC
GCCCCACTGTTGCCCGCTGGCCTGCGCGTCACGACCACGATGATAAATCGCCTGTCGTACACCAATACGA
TGCCAGTCACGGGCATCGTCCAGCGTCCAGTTGCCGAATAGCTCGATCTGAATTTCACCGCCGCAGTTCT
GTGCTATCGCGTGGCCTTTTTCCACCGTGGCGAGCGGCGCGGCGCAGATGATGGTCATCCAGTTAGCGCC
TGCGCCAAATGCCTGTTGCGCGAGCGTTTCACCCGCGTCGGCGACCTTCCAGTCGGCAACGATGATTTTG
TCAGGGCACTGTTCGCGCAAGGCTTTCACTGCGCCAAGCCCTTCGTTTAAACAGAGAATGGTGCCTGCTT
CGACAATATCGACGCTGTCTTTTAACCGCGTCACGTCGCGCTGCGCGGCTTCAAGTGATGAGTGGTCGAG
GGCCAGTTGCAGAAGTGGTCGACTCATAATGTGTGCTCCTTGATGCGGGTGTGATAACCCTGAAGTGCGG
CAATGAGATGTTGATAGCGTTGGTATTTTTGTTGGTAAAGCTGATGCGCGGCCATATTCGGCAGCAGGGT
GCGTACCGGGTGCTGTAAGTCACGTTGGGCTTCGCTGAAATCGCGATAAACCCCGGTACCGACGCGGGCG
GCAAGTGCCGCACCAAAGCAGCCGGTTTCTTCCACCTGCGGCAGCTCGATACGCAGACCGCTGACGTCCG
CCAGCATTTGCATCCAGACATCGGAGTGCGCCGGGCCGCCAGTGACGCGCAGGGTGTGCACATCAGTAAA
ACGTTCGCGCATCCGGTTGAGATGGGTCATATGGCTGAACACCACCCCTTCATAGATAGCCTGTAAGAGG
TGTGCACGGGTGTGAATGGCCTGCATCCCGTAGAAACCGCTGGTCATTTCGAGTCCGGCGTTGCTGCCGT
ACAGGAACGGCAGGAAAAAGAGATCGCCACCGGCTTTCGGCAAACTGGCTACGGCCTGATTAATCTCAGC
AAATGAGATTTCTCCCCACTGTGCGGTAAACCATTCGAGATTGCCGGAAGAGGTGGGGCTGGCTTCGTGA
ACGATAAATTGACCATCGTTAACGTAGCGACCATAGACATACGGATGCGCTTCACCGTCACGTAAACCGT
GGGTTATGCCGCTGGTCACCGCCCAGGTCCCCATCACCGCATTGAGGGTGAATTCGTCTTCGAGCCCGGC
GCAGAGTGCGGTGGAAACCACATCAAACAGGCCGCCGACAACGGGGGTACCCGCTTTCAGACCGGTCAGT
ACGGCTGTCTGAGCGGTGATTTCCCCGCAGATTTCGGCAGATCCGACAACAGGCGGCAGGGCGTGATTGA
TTTCAGCAATCCCCAGCCAGTCGGTAAGGCACGGGTCATATTCCCCGCGACTCATGTTGTAGAGATTGGA
CTCAGAAATATTGCTCTCTTCGCAACCTTTGACGCCGGTTAAACACCAGCGCAGGTAGTCGTGCGTCATC
ATCACGCAGCCAATTTGCGCGTAGCGTTCTGGTTCGTGCTCTTTCAGCCAGCGTAACAGCGACACCGGAT
GCCCGGTCCATAAGGTTTGTCGGGTCAGCGGATAGAGTTTTTCCGGGATGCCATCTTCCTGCCAGCGACG
AACGATTTCCATCGCCCGGCGATCCGAGGACAAAATGGCGTTACCGAGCGGTTTGTCGTTTTTATCAAGT
AGAAATAAGCCCTTTCCCTGCGCGGAGATGCCGATACCGACAATTTGTTCCCCGCTGACGCCGGAATGGG
TAAGCAGGGCGCGAATGACAGCAGTGCAACATTGCCACAGTTCTGCCATGTCGCGCTCTGCCCAGCCTGG
CTGTGGACTTAATGCGCACAGCGGCAGGCGCTGCACGCCCGCCTCCCGGCCTTCTCGGTCATACAGCCCG
GCTTTTAGCCAGCTACCGCCACAATCTAACCCCAGCCAGTATTGCGTCATGGTTTATTGCACCTCATCCA
CGGCTTTCAGCAGGTCAGCACCCTGGGGAACATCTTTAACAAACATGTCACGGACCTGAGTACCCAGCGC
ATCGCTAAAGGCTTTGCGGTCGAGATCGGTGATGACTTCCACGCCCGCTTCTTTCATACCGTCGATGATT
TTTTGCTGATCTTCGGCGACCAGTTTGCGCTGATAGCTACCCGCTTCCTGCGCAGATGAGATCAGTGCCT
GTTGGAACTCCGGGGTTAAGCCATCAAACTTCGCTTTGTTGATCACCACCAGAAGCGGCGAATAGGCGTG
ATGGGTCAGAGAAAGGTACTTCTGCACTTCATAAAATTTTGCTGACCAGACGACGTTGATCGGGTGTTCC
TGAGCGTCGATAGTGCGGGTTTCCAGCCCGGTATAGACTTCGGCAAACGGCATCGGGATCGGGTTAGCGC
CAAAAACTTTAAATGCGGCGATATTCATCGGGCTATTGTTGGTGCGGATTTTTAGTCCTTTCAGGTCGGC
AGGCGTTTTGACCGGTGCACGCGAGTTGGTGACATCGCGCCAGCCGTTTTCCCAGTAAGCCAGCACTTTC
AGCCCTTTACCTTCAAGGGAGACTTTCAGGTCATCACCGACTTTGCCGTCGAGCGTTTTATGCGCGTGAG
CGGTATCGCGGAACAGGAACGGGACATCGAGCAGGTTGATGACGGGCGAGAGTCCCGTAAAGTTGTTAGA
GCCAGACATCTCCATATCAATAGTGCCGCCACGCACGCCGCTGATCATCGCCTGCGCATTACCAAGGGTG
CTATCCGGGAACAGTTTTAATTTCAGTTCGCCTTTGGTTTTTTCCTGCAGTAATTCATTAAATTTTTTCG
CCGCAATATGTTGTGAATCGGTTTGTGAGGTTTCATAACCGAAACGTAATGATTGTGCCGCCAGAGAAGA
TGTGCTGAACGTCGCCACTCCGGCAATTAATAAAGCGTAGGTTACAGAACGTAATTTCATTATGATTTCC
TTTTAACTCATCCATTTAAGAGGAGCGGTAATGAGCTCCGGTATAAAAATAAATAATGCTAACAACATGA
ATAAAACCATGACGTAAGGCGCAACGCCTTTTACCGCATCGTCAAATTTAAGTTTCGCCACGCCGCATAC
CACGTTAAGAACATTATCGACTGGAGGCGTAATCAGTGATATTGAACAGTTGATAATAAACATGATGCCG
AAATAGACCGGATCTATTCCCGCTTCTTTCACTAATGGCATTAATACTGGTGTAAGAATTAATACGGTAG
GCGTTAAGTCCATGACCGTACTGATCACCATAATAGCGAGCATAATGACGATGAATAATAAGCGAGGCGA
ATCAACCAACGGTTGTAATAGCTCCGATACCATCATGGGTAATTCGGCGATCGTAATAAGCCATGCAGAT
ACCGCAGCAGAGGCCACCAGGAACATCACCACGGATGTGGTTTTTGCCGCGTTAATCAGCACATGATAAA
GCGTGGAGAAGGTCATCTCGCGATAGACCACCACCGAGACGAACAGAGCGTAGAAGGCGGCAACCGCGCC
TGCTTCGGTCGGTGTAAATAACCCCGAACGGAAACCGCCAATAATAATTATCGGTAAAAAGAGCGCCCAA
ATACCGGAAACTAAGGATTGCCAGACTTCTCGCAGTGAGGCTTTCGGCTGACAAGGTAAATTCAGTCGTT
TTGCCTGCCACCACCAGGTAACCATCAGCGTGACGCCCATCATGATGCCCGGTGCGATGCCCGCCATAAA
CAGTTTGCTGATGGAGAGTCCGCTGGAGACGCCGAAGATAATGAGTGGTATGGAAGGCGGGATAATGGCC
GCAATAATCCCGCCGGAACCGATAAGCCCGGCGGCGCGGTTTACCGGATAGTTGGCCTGGCGCATCATCG
GCACCAGCAGCGCGGCGACAGCTGCGGTATCAGCAACCGCAGAACCGGACAGGCTTGCCATGATCATCGC
TGCCAGCACGCCCACGTAACCCAGACCGCCTGGCCTGTGGCCTACCAGTTTCATTGGCAAGTCGACGATA
CGTTGCGACAGGCCGCCCGCGTTCATGATCTCACCCGCCAGTACAAAGAAGGGGATGGCTAACAGGGAGA
AGCTGTCTGCGCCATTTACCAACGTTTGTGCCAGAATTTGCACATCAAAGATATCCATCCAGAACATCAA
TGAAATGCCGCACAGTAATAATGCCCAGGCGATGGGAACGCCAATTGCGATAGCCCCTAACAAACTGACA
ATAAATATAAGGATTGTCATCGTCAGGCTCCTTGTTGGTTTCGGCTGGGGGTATTTGTGAACTGCCGGTA
TAAGTGACGCAATTCCAGCAATGCGATAATCAGACTGGTGGGGATAGCGGCGGCGTACATTAAGCCAACG
GGGACGCCAAGAATGGGCGATAAGTTGCTCCAGTCTTGCGCTGTTTTTTCTATAGCGCCCCAGGCCAGCC
CCAGACACAGCAATAAAATGAGCGTATGGGTTAGCAGCGAAACACGTTGTTGATTAGCCGGTGAGAGTTT
TTCGACTAAAAAAGTAACCTGCACATGGCTGTTGTCCATATAAGCAACGATTGCGCCAATAAAGGTTAAC
CAGACAAATAAAAGTCGGGATAATTCATCAATCGATAATATACTTGTGTGGAATCCATATCGAAGAATGA
TATTAATAAAAATAATACAAGACAGTATTGCGATGATGATCGCAAGAATGCCTTCGAGTATCCGTTTCAT
AACGAGTCCTTCTGGTTATGCAATATTTTTTATGCGCTAATGTTGTTAATATTCGTAATAATTATCAGAA
AACGGCTAATTAGATATTCAAAGTGATATATAAATGGTTCTGTTTAACGAGATTCATTCAGAGAGTGAAT
GCCGTTGCGTAATATTTCGATGCGATGGTGCACATCAGCCGTCGCATTTATTTCCAGTAGCTTGATCCCA
GCAAAATGCAATGTTGACGATTCTGCTACATTAAATAACTCGCGAACATGATCTGTGGTCATCAGGCTTT
CTGCGCAGAATGGTGCAAACGGTGCGTGTAAATCCTGCCATTCGCCGTATGCCCCGTTTAGCGTCGTACC
AGAGAACATTAACGCGCCGAGTTTTCCGGCTTGTTTCGCCATTTGGGTGTGGGTCAGCGGCAGCGTTGTA
TTGCGCCCTTCAATGGCAGAGCGCGCCCAGTTGATACAGATGCTGATGTCATAATCGGTAATAACTTCCA
GCACATTTTCTAAAGGCAAAAAGCCTTTTCGGGGGGAAGAAGATGTCATGGCGTCGCAGTGTTCCAGCAC
CAGCTTGCACGGCCAGTCCCAACTGGCGATTTCTTTCAATGAGCGGGCAAAAGCGTCCGTCGCTTGCATA
ACATTAGGATTCGTTGCTAACGGTGCAGCCTGGAGCTCCAGTGCGAGCACTTTATTAGCCTGCAATGCGT
TGATTTTATTGAACAGGTGGCGATAGTACGCCACGCAGGCCTGGCGCTGTTCTTCATCACTGGAGGCGAG
ACCAAACCCGCTGTTTTCGCTGCGGCGACGCATGGTTTCCATCACTGCGGTGACGACAAATTTCCAGCTC
TCTGGCGTATGACGGAGTAACCATTGATCGCCCAGCGGGTGGAAGTTTTCCAGGCAAGGTTGTTCCAGCC
CCAAAATGTCTGGAGTCTCAGATAATTGTCGCCAGAAATCCTTCTCTTCCTCTTCACTTCTTTGGTGAAA
AGAAGGTGCACAGGGATACGCGCCGATAATATAACCGGCATTATTCGTTTTCATTATGTGCTCCAGTAAT
CATTTTTTATAAAGCAGCGAGGGCCACTTTAACCACGATCTTGCGTATTGCCGTAGTGGCATTTTTATTA
CATGCCGGGCGATGTACATCCTGCGGGAAGAAAATAGCATAACTACCCGGTATCATTTCTATAAATGATT
CATGTTCACTATCGTGATAAAAAATAATATCGCGCTGCTCTAATAGTGATTCGCTGACTTTATTGTTTCC
CGTATCAATGGCAATGCCAATTTTCTCTTCACCCCACGCCAGAAACTGAATATCGATATACCGACGATGC
ACTTCCGGACGGTTTTCCACCGCTTCGCGTGTGGTTAAATCGATAATTTGCGCATAAATATTCTTGCCGT
CGATTTCGACAACGCCCGGCTCCAGGGCGTTGAAGTCGGTGGTGCGCAGAAAATCGAGCGCCTTTTCAAT
GGCGGCGGGCAAACGGCACGGATTAGGCTGCGCGATATGTCCAAAAATCATGGCTTATCTCCTTATAACG
CCTGGATTTTTGCCCACACGCTGTCATCAACGGTAATACCGTTACGGCGGTTTTCTGCCAGCAGGGTAGT
AAATTCGTGGCCGGGTAAACGAATAGACTGGTTTTCGTCAGCACGCTCGGCACTGGTAACGTAATCCATA
ATGCGTTGCAGTTTGGCATCGCGGGTGGGACCGTCGATAAGCTTGTCCACTTCAATGGCAATAAAAATTT
GTGAAATGCCGTATTCGTCGCTGTTGTCCTCGGTGACTTCGGCAACCGATGCGCCGTCAGAAAGGAGGGT
AGCGATCATATCCAGCACAATCGACATGCCCGAACCTTTCCAGTAGCCCATCGGCAAAATGCGGCGATTT
TTCTCGATAACGCCAGGTTCTTTGGTCAAATTGCCCTCATCATCAAAGCCACCATCTACCGGGAGCTGAC
GACCAGCCAGGCGATTAACTTCTAACATGCCGTAAGAGAACATCGACATCGACATATCGACCATGGTGAT
CGGCGTGGAAGGAATGGCGACGATCAGCGGGTTGGTGCCGATGCGACACTCTTTTGCGCCCCACGGTGGC
ATTACGGCGATGGAGTTGGTCCAGCAAATGCCAATATAGCCTTTTTCCGCCGCCTGCCAGCCGTAGCTGC
CGCCGCGCATCCAGTGGTTGGCATTACGTAGTGCCACCAGACCAATACCGTGATCGGCAGCCAGTTCAAT
GGCGCGATCCATCATCTTTTTCGCTGTCAGGTTACCGATCGAACGCTGGGCGTCCCACTGTTCAATTGCG
CCGAGGCTGGTTATACGTTTGGGTTGGGCATCAGGAATGATATCGCCGTTTTCCAGTTGTTGAATGAAAC
GAGGGAAACGATTAACGCCGTGAGAATAAACGCCGGATTCGGTGGTGCGGGCGAACATCTCTGCACAGGC
GTCAGCCGTTTCGCTGTCAACGCCGCGTGAAATTAAGACCCGATTAAAGGCTGCTTTTAACTGCTCAAAT
GTCACTTTCATCCCAGGCTTCCTTGTTTTTTTGATCGCTTTTTTGGCTTAAAATTTCAATATGCGAAACT
TGATTTCAAATATATCGATCACTTTTTAACAAAGCAATCTGATTGATGAATTTCAAAAAACTTAAAAATC
AAGTGGTTATAAATTATCTGTCGAGATCGTGAACTACAGCACACTTTGCGCTACCATCAGGACGCGACAA
AATGGGGAAAGAAGTGATGGGAAAAAAAGAGAACGAGATGGCGCAGGAAAAAGAGCGCCCAGCCGGAAGC
CAGAGTCTGTTTCGTGGGTTGATGCTGATTGAGATTTTGAGCAACTATCCAAACGGTTGTCCGTTGGCGC
ATCTTTCGGAGCTGGCTGGTTTAAATAAGAGTACCGTCCATCGCTTATTGCAGGGATTACAGTCCTGCGG
CTATGTGACCACCGCGCCCGCCGCAGGGAGTTATCGCCTGACCACCAAATTTATTGCCGTCGGGCAGAAG
GCGCTATCTTCGCTGAATATCATTCATATCGCCGCTCCGCATCTTGAGGCTCTGAACATCGCCACTGGTG
AAACTATTAACTTCTCCAGCCGCGAAGACGATCACGCTATTTTGATTTATAAGCTGGAACCCACAACCGG
GATGCTGCGAACCCGTGCCTATATAGGCCAGCATATGCCGCTCTACTGTTCCGCAATGGGCAAGATCTAC
ATGGCGTTTGGTCACCCGGACTACGTGAAGTCATACTGGGAAAGCCATCAGCATGAGATCCAGCCGTTAA
CCCGCAATACCATTACCGAGCTGCCCGCGATGTTCGACGAACTGGCGCACATTCGTGAAAGTGGAGCGGC
GATGGACAGAGAAGAAAACGAACTCGGCGTCTCCTGTATTGCTGTTCCGGTGTTTGATATTCATGGGCGG
GTGCCGTACGCCGTGTCGATTTCGCTTTCGACATCACGTCTGAAACAGGTGGGAGAGAAAAATCTCCTGA
AACCACTGCGTGAAACCGCGCAGGCTATTTCTAATGAACTGGGATTTACTGTCAGGGACGACCAGGGCGC
GATTACATAACCCTTTGGACAAGTGCCAAAACTTTAACATTTCCTTCGTTGGATCAAAGCAGTAGGGACG
CGCGCTCTGGCACTCTGCTGTTTTAGTGCAAAGGAGTGATCATGAACCGGTTTATTATTGCGGATGCGAC
GAAATGTATCGGTTGCCGTACCTGTGAAGTGGCTTGCGCAGTGTCGCATCAGGAGAATCAGGATTGCGCT
GCGTTGTCACCAGACGAGTTTATTTCCCGTATTCGTGTCATTAAAGACCACAGCTGGACCACGGCAGTAG
CCTGTCATCAGTGTGAAGATGCACCGTGCGCGAATGTCTGCCCTGTTGACGCGATAAGCCGCGAACATGG
GCATATTTTCGTTGAACAATCACGTTGCATTGGCTGTAAAAGCTGTATGCTGGCTTGCCCGTTTGGTGCG
ATGGAGGTCGTTTCTTCGCGCAAAAAGGCGAGGGCGATTAAGTGCGATCTGTGCTGGCATCGGGCGACGG
GACCGGCCTGTGTTGAAGCCTGCCCGACAAAGGCGTTGCAGTGCGTGGATGTCGAGAAAGTGCAGCGGCA
TCGGCTACGGCAGCAGCCTGTTTGAAACGTTTTTCCGGCGTTTCTCAACGCCGGAATAGTGCGCTTTGTT
TATGCCGGATGCGGCTAAAACGCCTTATCCGGCCTACAAATTCTACCAAATTCAATATATTGCAGAAATC
ATGTAGGCCTGATAAGCGTAGCGCATCAGGCAATTTTTAGTGACTTTCAGCCCAGGCTCTTTCTATCTCT
TCCGCCAGAATCTTCACACCCGCCTCAATTTTCTCCGGCTCTGGTACGTAGTTCATGCGCATACATTGAT
GCGTATGCGGCCACGGTTTATCCAGTCCCGGGAAGAAGTTGTGCCCCGGCACCATCAGCACGCCGCGTGC
TTTCAGGCGCTGGTAGAGCTGCTCGGTCGTAATGGGCAAATCCTTAAACCATAGCCAGAGGAAAATGGCT
CCTTCCGGTTTATGAATCAGGCAGCGATCTTCCGGTAAATAGCGGCGAATGATGGCGATAGTTTCCTGAA
CACGCTGGTAGTAAAACGGTTTGATGACTGTTTCAGACAGGCGCAGCAGATCGTTACGCTTAATCATTTC
ACACATCATCGCCGGACCAATACCGCCAGGTGCCAGGCTGATAATGCCGTTCATATTGGTGATGGCGGTG
ATGATTTTTTCATTGGCGATGATAATGCCGCAGCGGGAGCCAGGTAGCCCCAGCTTGGAAAGACTCATGC
ACAGCACGATATTCGGATTCCATAGCGGGCGCGCTTCGCTGAAGATGATACCCGGGAACGGGACGCCATA
AGCGTTATCAATCACCAGCGGAATGCCGTGTTGATTCGCCAGCGCGTCAAGCTTCAGCAACTCTTCGTCA
GTAATCACATTGCCTGTTGGATTCGTCGGCCGGGAGACGCAAATCATCCCGGTTTCTTCGCCAATATGTA
GATGCTCAAAATCGACGTGGTATTTAAACTGGCCTTCCGGCAGCAGTTCAATATTCGGACGCGCAGAGAC
AAACAGATCTTCTTCCAGTCCGGCGTCAGCGTAGCCAATGTATTCCGGTGCCAGCGGGAACAGCACTTTT
TTGACCCGACCATCGGCACGGCGTCCGGCAAACAGATTAAATAAGTAGAAAAACGCGCTCTGGCTGCCGT
TTGTTAGTGCAATATTCTGTGGTTCGATATCCCAGCCCAACTTCTCGCGCAGCATTCCGGCAAGCAGTGT
GAGTAGCTCCGTTTTCCCCTGTGGACCGTCATAATTGCACAGTGCATCAGTCGCTTTGCCACTTTCCAGC
ATGTCGGTCAGTAGCGTCTGGAAGTAGTTCTGCATTTCCGGGATCTGCGCCGGATTACCGCCGCCGAGCA
TAATCGCGCCAGGCGCGCGTAAACCGTCGTTCAGATCTTCCATCAGCAGCGTAATGCCGGAGTGGCGGGT
AAATTTGTCACCAAAAAGGGAGAATGTCATAGCGGGATATCTGTCGAACTCTGTAGCAAGGAAGGTAACA
ATAACGCTACATTTGCTGGGGTGCAAATCGGTCTGTTGAAGAGTGAGCGGTGCTTTATCCTGCAATGCTG
ATTAGGGCTGACATTTTATCCTGGTTGGCGGCTTCCCGAGGTACTGACGAACGGGAAGCCGGAAAAGTCA
CTGTTGCCCCGCCCAGATGACCAGCACTTTATCGTCGCCATGCTCACGAACAAAGCCGTAGCCCTGCTTC
AGCGAAAGTGTCGTTTGTTTGCCCGCGCCAATTGCGGGATGGCGGGCGCGGAACTGGCTGATTTTCTGCC
AGTGCGCGACGCTGGCGGCAGATTTACCGCTAACATCCTGCCAGTTCATATCCGAACGCGTACCTTGCAG
CGGATCAGAACCGGTAGGACCGAACGGACGCGAGGATTCATCGCCATAAAAGATTTGTACCGCGCCTGGC
GCTAATAATAATAACTCTGCTGCTTTGTGGCCCCCTTCACGGAACAGGCGGGTATCATGCGACGAGAGGT
AGCTCAACACGTTGAAATCCTGCAATTTCTCCGCCATTTGCTGCCAGGTCGTATCCATCTGCGCCAGACA
ATCGACTGCTTTCGCCGCCTGCTCCTGATAATCGAAATTGATCATCGCATCGAAGCCGTGGCGATAGTAG
TCACTTTGCATCACGCCGTGGCCCCAGGCTTCACCGGTCATCCAGAAAGGTTTGTCATCTAATGCTTTGT
CGGGGTTAGCTTTTTTCCATTCGCGAAGTGCAGCGCTGGCTTCGGTTTTCAGTTGCTGCCAGGTGGGCAA
CTCAACATGTTTGGCGGTATCGACCCGAAAACCATCAATCCCATAGTCGCGGACCCACTGACTTAACCAG
TGGGTTAAGTAATCGCGAGGGGTAAAGCCGTCGATGTCTTTAGCGTGGGTATCCGTTTTGTTTTTATAGA
ACACTGGCAGACCAGAAGCGCTAGTTGATTCGGTTTTGATATCCGGCAAAAAGGCCAGCGACATAGTGAG
ATCGTCGAATCCAGGATTGTCGTAATCGCCGATATCCGTTCTGATCCAGTTTTTTCCCCACCATTTATCC
CAGCCTGTTTTGTCGCTGAAATTAATGTAATCGTTAAAGCTATGCCAGGTTTGCCCGGCGGCAGGTTTCC
AGTCGCTCCAGCGTTCACCCAGCGTTTTTTTCAGCTCGTCACCAGAAAGATATAACGCGCCAAACTGATA
CTCCTGCATATCCGCCAGCGTGGCATAGCCAGTGTGGTTCATCACGACATCAAAGAGAATACGAATACCG
CGCTGATGCGCGCTATCAACCAGCGTCCGTAGATCGGCTTTACTGCCCATATTGGCATCAAGATTCGTCC
AGTCCTGTGTGTAATAACCATGATAGGCATAATGCGGGAAATCACCTTTTGTACCGCCGCCGACCCAGCC
GTGAATTTGCTCAAATGGGGCGCTTATCCATAAAGCATTAACGCCCAACTGCTGGAGATAATCCAGTTTG
TTGGTCAGGCCGCGTAAATCGCCGCCGTGAAAAGTGCCAATTTCCGCCATACCGTCTTTATGACGTCCGT
AACTCTGGTCATTATTGGGATCGCCGTTTTCGAAACGATCTGTCAGCACAAAGTGAACCGTGGCGTTATG
CCAGTCGAAAGGGGCAGAGGCGTCAGTTTCGGCTCGTTCCAGCAGGAGTAAACCGTTGCTGCTGGCAGCG
GGTTGTAACGTTATTTGACCGTTCTTCACTATCGCAATTTGCTGGCTGTAATAATCCCGGACTGCGACTC
CCTCCGGAAAAGTGGCGCTGACATCCAGTGTGAGCGGTAATCCATCCCATTTCGGGCATTCACGGACCAG
GCTTGCTACCGGTTCGACGGCGTTCTGGATGGAAATCATCAATGTTGGCGTACCGGAGCGGGTGTCTAGT
TGCAGCGTATATTCGCCGTCCCTGAACAATCGCCATTGAGGTGGCGTGTTGCTACAAGGTTGCAGGGAAA
GCATCTGATTGAGTTTTATCGCATCCGCAGGCTGCCAGCACTGTTGGTCAAAATTTAGCGTTAGTGGACG
CGTACCTTTGGGCAACTGCGCGTGGCTGACAAATGTTCCCGTCCCCTGTTCGCTAAAGGCAGGGAACCCC
GGAGAAGTCCAGCTGGCGGCAACGGCGAAGCCAGGAAGGAGTGTCAGAAAACAGACGGCGAGTTTCATGG
CGGATGAGTCCTTATTGCTGCGATTTCAGACAGTTTGCCAGCGATAAGCCAGACAAAACTCATCCCTGAG
CGGTAAGTCCACAGGATGAGAAGCAAGGGTGAGCGATCGCGCGCAAAAAACGGCTGAATTTTGCGATAAA
CCCCACATTTTCTGCGATTTAGCGCCAATCTGAATCGTTAACTCGTGACATAGTTTCAGATTTGGACTAT
TCCTTGGGGTGCTCTTGACAGCTATTTTTGATATGATTTGAGATTCAACTCTCAAATTTGTAAAAAATAT
AAGGTGTTGGAATGATTAAATCCGACCAGGAGACCTGATGATTTTGACTCCCATACGACGATATGGGGCG
ATGATTCTTATGTTACTCACTCTGGTGTTTTCGAGTGAGGTGTTAGCGAAGACGCACACAACAACAGCGA
GTCAAAAGTCCCACTTAACTAAAGCTAGTAATAAACAGGTAAGCAGTAAACAAGAGTATTCTCGCAATAG
TGCAAAGAGTAGTTCACTTCCTGATTTGCGAAAATACCCTTCCGGAACACCAAGGAAAAAGGCGTTTCTC
CGGACTGTAATGCCTTACATTACCAGCCAAAATGCGGCCATTACTGCGGAACGTAACTGGCTGATTTCAA
AACAGTATCAGGGCCAATGGTCACCTGCTGAGCGTGCGCGTCTGAAAGACATCGCCAAACGCTACAAGGT
GAAGTGGTCTGGTAATACGCGAAAAATCCCGTGGAATACCTTGCTTGAACGCGTAGACATTATCCCTACC
AGTATGGTGGCGACGATGGCTGCAGCAGAAAGCGGTTGGGGAACGTCAAAGCTGGCGCGCAACAACAACA
ACCTGTTCGGCATGAAATGCATGAAAGGACGTTGTACCAATGCGCCGGGTAAAGTGAAAGGGTACTCACA
GTTTAGTTCTGTCAAAGAATCGGTGAGCGCCTATGTCACTAACCTCAATACGCACCCGGCTTACTCTTCG
TTCCGTAAATCGCGTGCACAACTGCGTAAAGCGGATCAGGAAGTGACTGCCACAGCGATGATTCACAAGC
TGAAGGGCTACTCGACCAAAGGGAAGAGTTATAACAACTACCTGTTCGCAATGTACCAGGATAACCAACG
GTTAATCGCGGCGCATATGTAATTGCATTTCCTCGAGCCTTATCCGACTTGTCGGGCGGATAAGGCTTTT
GCTCGTATCAGGTGGTTGTGCTGAGTTACCTGATGCGACGCCGATAATTCTCATCATCGCTACAACATGA
CCTCGCTATTTACATCGCGATACTCTTTTGGCGTTGTGTCATATGCTTTTTTAAAAACAGAGTAGAAATA
TTGCAGCGATGGATAACCGCACATTTGCGATATCTCGTTAATTGACAAGGTGGTTGAAATCAGCAGACTG
CGCGCTTTCTCCAGCTTTTCGGCATGAATCATGGCGTGAATGGTTTCGCCCACCTCTTCTTTAAAACGCT
TCTCAAGATTGGAGCGTGATATGCCCACCGCATCCAGTACCTGATCCACTTTAATCCCTTTACAGGCGTG
ATTACGAATGTAATGCATGGCCTGAATAACGGCGGGATCGGTCAGCGAGCGGTAATCTGTTGAGCGCCGT
TCAATGACGCGAACTGGTGGGACCAAAATCCGCTGTAGCGGCATTTCTTCTTTATCTAATAATCGATGCA
ACAGTTTTGCCGCCTGATAGCCCATTTGCCGTGCGCCCTGAGCGACCGAAGAAAGGGCGACACGCGACAG
ATAGCGGGTCAGTTCTTCGTTATCGATGCCAATCACGCATAATTTTTCCGGTACGGGAATGTGTAGATGT
TCACATACTTGCAGAATATGCCGCGCCCGGGCGTCAGTAACGGCAATAATCCCGGTTTGCGGTGGCAGCG
TTTGTAGCCAGTCTGCCAGCCGATTTTGCGCGTGTTGCCAGTTCTCTGGCGCGGTTTCTAACCCCTGATA
AACCACTCCGCGATACTTTTCTTCGGCGACAAGCTGACGAAATGCATATTCGCGTTCAGTGGCCCAACGT
TTACCGCTTGATTCCGGAAGACCATAAAAAGCAAAGCGGTTAACGCCTTTCTCTTTTAAATGCAAAAATG
CGCTTTCAACCAGCGCATAGTTATCGGTGGCAATGTAATGAACGGGTGGGTAACTTTCGGCAAGGTGATA
CGAGCCACCAACCCCAACAATGGGGACGTCGACATCAGCCAGCGCTTGCTCGATTTGTTTGTCGTCGAAG
TCGGCAATGACGCCATCTCCTAACCAGTCCTTGATTTTATCAATGCGGGCGCGGAAATCTTCTTCAATGA
AAATATCCCATTCCGATTGTGACGCCTGTAAATATTCCCCTACGCCTTCTACTACCTGCCGGTCATAGGC
TTTATTGGCATTGAACAGTAATGTGATGCGGTGACGTTTAGTAAACATGGTTCTTTTCCTGCTGAATCAT
GCAAAAACTCAAAACCGGTAATACGTTACCGGCTTTGAGAAAATTTTTATCAAAATCAAGAACGGCGTTT
GGTTGCGGAGTCCATCCATACTGCCAGCAACAGAATCGCACCTTTAACGATATACTGCCAGAAGGTCGGT
ACATCCATCATACTCATGCCGTTATCCAGTGAAGCCATGATGAATGCCCCCATTACTGCTCCAGCCACGC
TCCCGACGCCGCCTGCCAGACTGGTGCCGCCAATCACACATGCTGCAATTGCGTCCAGCTCGGCGATATT
TCCCGCAGAAGGTGAACCAGCGCCGAGTCGAGAACTGAGGATTAATCCGGCGATGGCTACCATTAATCCG
TTAATAGCGAACACGGCAAGTTTGGTGCGTTCAACGTTAATCCCGGAGAGACGTGCCGCTTCCAGATTGC
CGCCGATGGCATAAATGCGTCGTCCAAATGCCGTCCGCGTTGCCATAAACATTCCGCCGAGTAACAGCAA
CGTCAGCAGCAGAACAGGAGTGGGAACACCACGGTAATCATTCAACAGCCAGATTGCGCCTAATACGATG
ATAGCGGTTAAAGCCTGGCGACCGACTACTGCGGTAGAGGCCGGAGACTGCAAACCCAAAGCCTGACGGC
GCATTCTTCCGCGCCATTGCCAGCCAACAAAAGCCATTAAGCCAAGCGCGCCAATGATGAAGCCGGTGCT
GGCAGGTAGATAGCTTTGCCCAATTTGTGACATCGCGGCGCTGGTGGGGGAAACAGTCGTGCCGTTGGTG
ATGCCAATGAGTATGCCACGAAATGCCAACATGCCCGCGAGGGTGACAATAAATGAAGGGACTTTGCGGT
ACGCGACCCACCATCCGTTCCAGGCTCCGAGAAGCAGTCCCAGAACCAACGTCACAATGATGGTAAGTGG
CAAAGGCCAGCCTAGCCAGACGTCACAAATCGCCGCGACGCCACCTAACAGCCCCATCATTGAGCCGACG
GAAAGGTCGATTTCAGCAGAAATTATGACGAACACCATTCCTACCGCGAGGATGCCGGTAATCGCGGTTT
GGCGTAACAGGTTGGAGACGTTACGGGCGCTTAAGTAGGCACCATCGGTGGTCCAGGTAAAGAACAGCAT
GATTGCGATGATAGCTGCAATCATCACGAAGACCTGCAAATTCAGTGATTTCAGCCCGGAAAAGCCACCG
GATGTCGGTACGGCTAATTTCACTTCAGACGGATTGCTTTTCGACATGATGTTCGCTCCTCAATGCGGCT
TCCATCACCTGCTCCTGAGTCAGGTTATGATTTATCAGGTTGGCTTTTAGTTTCCCTTCATGCATCACCA
GTACACGATCGCTAAGGCCGAGCACTTCAGGTAATTCGGAAGAGATGACAATAACGGCAATACCCTGCTG
GACGAGTTGGTTAATTAATTTGTAGATCTCGTATTTCGCGCCAATATCGATACCCCTGGTGGGTTCATCA
AGAATGAGAATGCGCGGGTTAAGTAACAGACAGCGAGCGAGGATCGCTTTTTGTTGATTGCCGCCGCTCA
AACGTCCAATAGCAAGGTCGGGGGACGACGTTTTAACTTTGAGTTGCTGGATTGATTCCAGAATACATTT
TTGCTCTGCCGCGTCATCAAGCTGGCTAATACTACCGGTAAATTTTTTGAGTGCGGCGAGGGTAATATTT
TTACCAACCGCCATTACCGGAACGATGCCGTCGCGCTTTCTGTCTTCGGGTACCATCGCAATCCCCTGGG
CGATGGCTTGCTGACAGTTACGAATATCTACCTGTTTGCCGTCAATATAAATTTTCCCTTCCCATTGTCC
GGGCCACACACCAAACAGGCACTGAATAGTCTCGGTACGTCCGGCACCAACGAGTCCGGCGATACCCAGT
ATTTCGCCACGTTTCAGGGAAAACGAGACATCATTAACTCGTTTAATATGACGATTAACCGGATGCCATG
CCGTCAGATGTTCAATACGTAATATTTCATCTCCGGTGGTATGTGGTTCATTAGGGTAAAGCGCGGTTAA
CTCTCGCCCGACCATCATGGTGATAATATCGTCTTCACTCATTCCAGCAGCATCACGCGTGCCAATGTGC
TGACCGTCGCGAATAACGCAAATCGTATCGGAAATCGCTTTGACTTCGTTGAGTTTGTGCGAAATATAAA
TACAGGCGATACCGTGCTGTTGTAGATCGCGAATAATATCCAGTAAAACCGACGTTTCCTGCTCAGTTAA
TGAGGCTGTCGGCTCATCGAGAATTAACAAACGCACCTGTTTATTAAGTGCCTTGGCAATTTCAACCAGT
TGTTGTTGCCCAAGTCCTAAATCGCCAACGCGGGTATCAGGTGAAATGGATAAACTGACCTGTGCGAGCA
GCTTCTGACAGCGTAGCGTCATCAGGTCATAATCCATAATGCCATTATGGGTTATTTCGTTACCCAGGAA
GATATTTTCCAGCACGGTCAGTTCTTTCACCAGCGCCAATTCCTGGTGAATAATGGCGATACCTTTGCGT
TCGGTATCGCGGATGTGACTCGCCTGAATCTCTTCTCCCGCAAAAATAATTTCGCCTTCGTAGGAACCAT
GGGGATAAATACCACACAGCACTTTCATCAGCGTTGATTTACCTGACCCATTTTCCCCACAGAGTGAGAC
GATTTCGCCAGCATTCAACCGCAAGCTGACGTTATCAATCGCCTTCACACTGCCGAAGGTTTTGGTAATG
TTCTTCATTTCAAGTAGATAAGGCATAACGACTCCACCTAAGCCAATTAATTCACGCGGCATGGAGAGAA
ATCACGCCCCCGCTCCGCGCCGGGGCGTAACGCTTACAGCTCGCTCTCTTTGTGGAATCCGTCTTTAACT
ACCGTATCTTTGATGTTGTTTTTATTCACATCGATCGGTGTCAGCAGGCGGGAGGGAACATCTTTCAGGC
CATTATTCAGTGTGGTATCCGCTTTTGGCTCCTGACCATTGCCCAACTCAACGGCAATTTCTGCGGCAGT
ATTTGCCAACAATGTAATAGGTTTATACACCGTCATAGTTTGCGTACCGGCAGCAATACGTTTAATACCT
GCAAGATCCGCATCCTGGCCGGAAATTGCTACTTTCCCTGATAAACCTTGCGCGCTTAATGCCTGAATTG
CCCCTCCTGCGGTGGCATCATTTGAGGCAACTACAGCATCAATTTTGTTATTATTGGCGGTTAGCGCGTT
TTCCATAATTTTCAATGCGTTTTCCGGTAACCAGCCATCAACCCATTGGTCACCAACGACTTTAATTTTT
CCGGAATCAACATAAGGTTTTAATACTTTCATTTGCCCGGCGCGGAACAGCTTGGCGTTGTTATCTACCG
GCGAGCCGCCCATCAGGAAGTAATTACCTTGCGGAACAATATCGACCAGGGCTTTTGCCTGCAGTTCACC
GACTTTTTCGTTATCGAAAGAAATATAAAAATCGATATCCGCATCGTTAATCATACGGTCGTAAGCTAAT
ACTTTAATACCTTCTTGTTTGGCTTCTTTTACAACGTTACTTAATACCTGACCGTTATAAGGAATAATGA
CAAGAACATCGACACCCCGGTTAATCATGTTTTCAATCTGCGACATTTGTGTTTCTTCATTGCCATTAGC
AGACTGTACAAATACTTTCGCGCCGAGAGATTCTGCTTTTTTCACAAAAATATCTCGATCTTTTTGCCAG
CGTTCAAGACGGAGATCATCAATCGCCATACCTATTTTGACTTCTTTGGCGTGTGCCGCAACGTTGGTAA
GCAGAAGTGAGGTGCAAAGGGTGAGTAGAATGTTCTTTATTTTCATGGTGTAGGGCCTTCTGTAGTTAGA
GGACAGCTTTAATAAGTAACAATCACCGCGATAAACGTAACCAATTTTTAGCAACTAAACAGGGGAAAAC
AATTACAGATTTTTATCTTTCGATTACGATTTTTGGTTTATTTCTTGATTTATGACCGAGATCTTACTTT
TGTTGCGCAATTGTACTTATTGCATTTTTCTCTTCGAGGAATTACCCAGTTTCATCATCCTATTTTATTT
TGCGAGCGAGCGCACACTTGTGAATTATCTCAATAGCAGTGTGAAATAACATAATTGAGCAACTGAAAGG
GAGTGCCCAATATTACGACATCATCCATCACCCGCGGCATTACCTGATTATGGAGTTCAATATGCAAGCC
TATTTTGACCAGCTCGATCGCGTTCGTTATGAAGGCTCAAAATCCTCAAACCCGTTAGCATTCCGTCACT
ACAATCCCGACGAACTGGTGTTGGGCAAGCGTATGGAAGAGCACTTGCGTTTTGCCGCCTGCTACTGGCA
CACCTTCTGCTGGAACGGGGCGGATATGTTTGGTGTGGGGGCGTTTAATCGTCCGTGGCAGCAGCCTGGT
GAGGCACTGGCGTTGGCGAAGCGTAAAGCAGATGTCGCATTTGAGTTTTTCCACAAGTTACATGTGCCAT
TTTATTGCTTCCACGATGTGGATGTTTCCCCTGAGGGCGCGTCGTTAAAAGAGTACATCAATAATTTTGC
GCAAATGGTTGATGTCCTGGCAGGCAAGCAAGAAGAGAGCGGCGTGAAGCTGCTGTGGGGAACTGCTAAC
TGCTTTACAAACCCTCGCTATGGCGCGGGTGCGGCGACGAACCCAGATCCTGAAGTCTTCAGTTGGGCGG
CAACGCAAGTTGTTACAGCGATGGAAGCAACCCATAAATTGGGCGGTGAAAACTATGTCCTGTGGGGTGG
TCGTGAAGGTTACGAAACGCTGTTAAATACCGACTTGCGCCAGGAGCGTGAACAGCTGGGCCGCTTTATG
CAGATGGTGGTTGAGCATAAACATAAAATCGGTTTCCAGGGCACGTTGCTTATCGAACCGAAACCGCAAG
AACCGACCAAACATCAATATGATTACGATGCTGCGACGGTCTATGGCTTCCTGAAACAGTTTGGTCTGGA
AAAAGAGATTAAACTGAATATTGAAGCTAACCACGCGACGCTGGCAGGTCACTCTTTCCATCATGAAATA
GCCACCGCCATTGCGCTTGGCCTGTTCGGTTCTGTCGACGCCAACCGTGGCGATGCGCAACTGGGCTGGG
ACACCGACCAGTTCCCGAACAGTGTGGAAGAGAATGCGCTGGTGATGTATGAAATTCTCAAAGCAGGCGG
TTTCACCACCGGTGGTCTGAACTTCGATGCCAAAGTACGTCGTCAAAGTACTGATAAATATGATCTGTTT
TACGGTCATATCGGCGCGATGGATACGATGGCGTTGGCGCTGAAAATTGCAGCGCGCATGATTGAAGATG
GCGAGCTGGATAAACGCATCGCGCAGCGTTATTCCGGCTGGAATAGTGAATTAGGCCAGCAAATCCTGAA
AGGCCAAATGTCACTGGCAGATTTAGCCAAATATGCTCAGGAACATAATTTGTCTCCGGTGCATCAGAGT
GGTCGCCAGGAGCAACTGGAAAATCTGGTAAATCATTATCTGTTCGACAAATAACGGCTAACTGTGCAGT
CCGTTGGCCCGGTTATCAGTAGCGATACCGGGCATTTTTTTAAGGAACGATCGATATGTATATCGGGATA
GATCTTGGCACCTCGGGCGTAAAAGTTATTTTGCTCAACGAGCAGGGTGAGGTGGTTGCTGCGCAAACGG
AAAAGCTGACCGTTTCGCGCCCGCATCCACTCTGGTCGGAACAAGACCCGGAACAGTGGTGGCAGGCAAC
TGATCGCGCAATGAAAGCTCTGGGCGTTCAGCATTCTCTGCAAGACGTTAAAGCATTAGGTATTGCCGGA
CAGATGCACGGTGCAACCTTACTGGATGCTCAGCAACGGGTGTTACGCCCTGCCATTTTGTGGAACGACG
GGCGCTGTGCGCAAGAGTGCACTTTGCTGGAAGCGCGAGTTCCGCAATCGCGGGTGATTACCGGCAACCT
GATGATGCCCGGATTTACTGCGCCTAAATTGCTATGGGTTCAGCGGCATGAGCCGGAGATATTCCGTCAA
ATCGATAAAGTATTATTACCGAAAGATTACTTGCGTCTGCGTATGACGGGGGAGTTTGCCAGCGATATGT
CTGACGCAGCTGGTACCATGTGGCTGGATGTTGCAAAGCGTGACTGGAGTGACGTTATGCTGCAGGCTTG
CCACTTATCTCGTGACCAGATGCCAGCATTATACGAAGGCAGCGAAATTACTGGTGCTTTGTTACCTGAA
GTTGCGAAAGCGTGGGGTATGGCGGCGGTGCCAGTTATCGCAGGCGGTGGCGACAATGCAGCTGGTGCGG
TTGGTGTGGGAATGGTTGATGCTAATCAGGCAATGTTATCGCTGGGGACGTCGGGGGTCTATTTTGCTGT
CAGCGAAGGGTTTTTAAGCAAGCCAGAAAGCGCCGTACACAGCTTTTGCCATGCGCTACCGCAGCGTTGG
CATTTAATGTCTGTAATGCTGAGTGCGGCTTCGTGTCTGGATTGGGCCGCGAAATTAACCGGCCTGAGCA
ATGTCCCTGCTTTAATCACCGCAGCTCAACAGGCTGATGAAAGTGCCGAGCCAGTTTGGTTTCTGCCTTA
TCTTTCCGGCGAGCGTACACCACACAATAATCCCCAGGCGAAAGGGGTTTTCTTTGGTTTGACTCATCAA
CATGGCCCCAATGAACTGGCGCGAGCAGTGCTGGAAGGCGTGGGTTATGCGCTGGCAGATGGCATGGATG
TCGTGCATGCCTGCGGCATTAAACCGCAAAGTGTTACGTTGATTGGTGGCGGGGCGCGTAGTGAGTACTG
GCGTCAAATGCTGGCGGACATCAGCGGTCAGCAACTGGATTACCGCACGGGTGGCGATGTGGGGCCAGCA
CTGGGCGCAGCAAGGCTGGCGCAGATTGCGGCGAATCCAGAGAAATCGCTCATTGAGTTGTTGCCGCAAC
TACCGTTAGAACAGTCGCATCTACCAGATGCGCAGCGTTATGCCGCTTATCAGCCACGACGAGAAACGTT
CCGTCGCCTCTATCAGCAACTTCTGCCATTAATGGTGTAAACGTTATCCCCTGCCTGACTTGGTGGGGGA
TAATTCACATCTATATATATAAATAATTAATTAATATTTAGTATGAATTTATTCTGAAAATCATTTGTTA
ATGGCATTTTTCAGTTTTGTCTTTCGTTGGTTATTCGTAATGTATCGCTGGTAGATATGGAGATCGTTAT
GAAAACCTCAAAGACTGTTGCAAAACTATTATTTGTTGTTGGGGCGCTGGTTTATCTGGTTGGACTATGG
ATCTCATGCCCATTGTTAAGTGGAAAAGGCTATTTTCTTGGCGTGTTAATGACAGCAACTTTTGGTAACT
ATGCATATCTTCGCGCAGAAAAACTCGGGCAACTGGATGATTTTTTTATCCATATCTGCCAGTTAGTTGC
GTTGATCACTATCGGTCTCTTGTTTATCGGTGTTTTAAACGCACCTATCAATGCTTATGAAATGGTGATC
TATCCCATCGCCTTTTTTGTCTGCTTGTTTGGTCAAATGCGTTTGTTTCGCTCGGCATGAGCAACATAAA
GTTCTTACACATTCAGGAATGAAAGGAATACTGTGATGGACAACAAAATATCAACCTATTCTCCGGCATT
TAGTATTGTTTCATGGGTAGCCCTTATTGGCGGTATTGTTACCTATCTGTTAGGACTATGGAATGCAGAG
ATGCAGTTAAATGAAAAAGGGTATTATTTTGCCGTACTGGTATTAGGTTTGTTTTCCGCGGCGTCTTATC
AAAAGACCGTTCGGGACAAGTATGAAGGCATACCTACCACCCCCATTTATTATATGACTTGCCTGACGGT
CTTTATTATCTCTGTTGCGTTGTTGCTGGTAGGTCTATGGAATGCAACGTTATTACTCAGCGAAAAAGGC
TTTTATGGGCTGGCTTTCTTCTTAAGCTTGTTTGGTGCAGTAGCGGTGCAGAAGAATATTCGTGATGCCG
GAATAAACCCACCAAAAGAAACACAGGTTACCCAGGAAGAATACAGCGAATAATTCACATAAGCCCGGTT
AGTCCAATGTAACCGGGCTTTTACTAACTCACTAATCTGTTTCTGTCGATTCGTTGTACCAGCATAGAAA
GTAACAAACTCGCTGCCAACGTCGCGCAAAAGATCCAAATAATATCGAGTATTGGCCAGTTTTTAAGCTC
AATCCCCCGGGTGCGCAGTGCATGGATAATCAATGCATGGAACCCGTATATACCTAACGAATAGCGGGAG
ATTAAGCCAAGTCCGCAAATGGTACGCGTATACAGCGTGTTTTTAACCAGAGTCAATAACGCGATTGCGC
AGATAAAAACCATCGGCCCACAGTAAAGATACCAGGTATCGGCAAAATTTCCGCGCCACTGTAATTCATA
TAATGTCCCGCGAGAGATAATAAAAACCCCCGTCGCAAACAGTGCGGCGCTCACCCACGACAGTGCTTTA
TGCTGTGTGTCCATCATCCCTATAGCGCGGCCCAACATGCCATAAAGGATGTAGTAAAAAGTATCGCCAT
TGATATATAAGTTAATTGGCAGCCATTCAAAACCGTCGATTTTCTGCGGCACAGTATTTGGATTAGCGAT
GATGCCAATTACCACCATTAGCACCAGCAACATTTTTCCGCCGACGTTCTTCACCTGAATCAGCGGTGAA
ACCAGATAAATCACTGCAATCGCGAAGAAAAACCATAAATGGTAAAACACTGGCTTTTGCAGCAGGTTTT
TCAGCGCTAACTCCACATTGATGGAGGTAAACAGCGCAATGTAGAGCAGCGCGATTGCGCTATAAAAAAA
CAGGCATAAGCCGATACGCAAGAAATGGCGCGACTGGGCGCTGCGTTCGCCAAAAAAGAGATAGCCGGAA
ATCATGAAAAATAGCGGCACGCTGACACGAGAGGCAGAATTCAGAACATTGGCGATATCCCAGGTGATGG
GGCTAACACTATGAGCATTGGTCACATACCAGGTAGTGGTGTGAATCATCACCACCATTAAACACGCTAT
CCCTCGCAGGTTATCAATCCAGTAAATTTTGGGCTGCATCTGTGTCTCTGTATCTGGTTAAAAAAAGTCT
GACCGATAAATCATTCAGTTGGCGCACTGGAATAATCTGAGTTTTATCACTACAGCTTATAGAGGCTTAA
GGAAATTCGTAAGATATCAGCCACTATACCGATATAAATAATAAGACTCACCTGCAAACCAGACGGTAAT
TTAATGATGATGAACGCTTTCTTTCCGGCAATGGCGCTTATTGTGCTAGTGGGTTGTTCTACACCGCCAC
CCGTGCAGAAAGCACAACGGGTAAAGGTTGATCCTCTGCGTTCGTTGAATATGGAAGCGTTATGCAAGGA
TCAGGCGGCAAAACGTTATAACACCGGCGAGCAAAAAATCGACGTCACCGCTTTCGAACAGTTCCAGGGA
AGCTATGAAATGCGCGGTTATACCTTCCGTAAAGAGCAGTTTGTCTGTTCTTTTGACGCAGATGGCCATT
TTTTGCATCTTTCCATGCGTTAAGCCCTGCTTTTTCCCGTTTCGTACTGTATATCTTCCATCCAGCGGGT
ATACTGATCCCTTCCTTTAAATCCACACGTATCCAGCACGAAATAATATGCAAAAGTTTGATACCAGGAC
CTTCCAGGGCTTGATCCTGACCTTACAGGATTACTGGGCTCGCCAGGGCTGCACCATTGTTCAACCATTG
GACATGGAAGTCGGCGCGGGAACCTCTCACCCAATGACCTGTCTGCGCGCGCTGGGGCCAGAACCGATGG
CGGCTGCTTATGTTCAGCCTTCTCGTCGCCCGACCGATGGTCGCTACGGCGAAAACCCCAACCGTTTACA
GCACTACTATCAGTTCCAGGTGGTCATTAAGCCATCGCCGGACAATATTCAGGAGCTGTACCTTGGTTCT
CTGAAAGAGCTGGGCATGGACCCGACTATTCACGACATCCGTTTCGTGGAAGATAACTGGGAAAACCCGA
CGCTGGGTGCCTGGGGACTGGGCTGGGAAGTGTGGCTGAACGGCATGGAAGTGACGCAGTTCACTTACTT
CCAGCAGGTTGGTGGTCTGGAATGTAAACCGGTTACCGGCGAGATCACCTACGGTCTGGAACGTCTGGCC
ATGTACATTCAGGGCGTAGACAGCGTTTACGACCTGGTCTGGAGCGACGGCCCGCTGGGTAAAACCACCT
ACGGCGACGTGTTCCATCAGAACGAAGTGGAGCAGTCCACTTACAACTTCGAATACGCGGATGTGGACTT
CCTGTTCACCTGCTTCGAGCAGTACGAGAAAGAAGCGCAGCAGTTGCTGGCGCTGGAAAATCCGCTGCCG
CTGCCAGCCTACGAGCGTATTCTGAAAGCCGCCCACAGCTTCAACCTGCTGGATGCGCGTAAAGCCATCT
CCGTCACCGAGCGTCAGCGCTATATTCTGCGCATTCGCACCCTGACCAAAGCAGTGGCAGAAGCATACTA
CGCTTCCCGTGAAGCCCTCGGCTTCCCGATGTGCAACAAAGATAAGTAAGAGGCGGCTATGTCTGAGAAA
ACTTTTCTGGTGGAAATCGGCACTGAAGAGCTGCCACCAAAAGCACTACGCAGCCTGGCTGAGTCCTTTG
CTGCGAACTTTACTGCGGAGCTGGATAACGCTGGCCTCGCACACGGCACCGTTCAATGGTTTGCTGCTCC
GCGTCGTCTGGCGCTGAAAGTCGCTAACCTGGCGGAGGCGCAACCGGATCGTGAAATCGAAAAACGTGGT
CCGGCAATTGCTCAGGCGTTCGACGCTGAAGGCAAACCGAGCAAAGCGGCAGAAGGTTGGGCGCGTGGTT
GCGGTATTACCGTGGACCAGGCTGAGCGTCTGACTACCGATAAAGGCGAATGGCTGCTGTATCGCGCCCA
TGTGAAGGGCGAAAGCACCGAAGCACTGCTGCCGAATATGGTTGCGACTTCGCTGGCGAAACTGCCGATC
CCGAAACTGATGCGTTGGGGCGCAAGCGACGTGCACTTCGTGCGTCCGGTTCACACCGTGACCCTGCTGC
TGGGCGACAAAGTCATTCCGGCTACCATTCTGGGTATTCAGTCCGATCGCGTAATTCGCGGCCACCGCTT
TATGGGCGAGCCGGAATTCACTATCGACAATGCCGATCAGTATCCGGAAATTCTGCGTGAGCGCGGGAAA
GTCATCGCCGATTACGAAGAACGTAAGGCGAAGATTAAAGCCGATGCTGAAGAAGCAGCACGTAAGATTG
GCGGTAACGCTGACTTAAGCGAAAGCCTGCTGGAAGAAGTGGCTTCGCTGGTGGAGTGGCCGGTCGTTCT
GACCGCGAAATTCGAAGAGAAATTCCTCGCGGTGCCGTCTGAAGCACTGGTCTACACCATGAAAGGTGAC
CAGAAGTACTTCCCGGTGTATGCGAACGACGGCAAACTGCTGCCGAACTTTATCTTCGTTGCCAACATCG
AATCGAAAGATCCGCAGCAGATTATCTCCGGTAACGAGAAAGTCGTTCGTCCACGTCTGGCGGATGCCGA
GTTCTTCTTCAATACCGACCGTAAAAAACGTCTTGAAGATAACCTGCCGCGCCTGCAAACCGTGTTGTTC
CAGCAACAGTTGGGGACGCTGCGCGACAAAACTGACCGCATTCAGGCGCTGGCTGGCTGGATTGCTGAAC
AGATTGGCGCTGACGTTAACCACGCTACCCGTGCGGGCCTGCTGTCTAAGTGTGACCTGATGACCAACAT
GGTCTTCGAGTTCACCGACACCCAGGGCGTTATGGGGATGCACTACGCGCGTCACGATGGCGAAGCGGAA
GACGTAGCTGTCGCGCTGAATGAGCAGTATCAGCCGCGTTTTGCCGGTGATGACCTGCCGTCCAACCCGG
TAGCCTGTGCGCTGGCGATTGCTGACAAGATGGATACCCTGGCGGGTATCTTCGGTATCGGCCAGCATCC
GAAAGGCGACAAAGACCCGTTTGCGCTGCGTCGTGCCGCACTTGGCGTGCTGCGTATTATCGTTGAGAAG
AACCTCAACCTTGATCTGCAAACGCTGACCGAAGAAGCAGTGCGTCTGTATGGCGATAAGCTGACTAACG
CCAACGTGGTTGATGATGTTATCGACTTTATGCTCGGTCGCTTCCGCGCCTGGTATCAGGACGAAGGTTA
CACCGTTGACACCATCCAGGCGGTACTGGCGCGTCGTCCGACTCGTCCGGCTGATTTCGATGCCCGTATG
AAAGCGGTATCGCACTTCCGTACCCTGGAAGCAGCTGCAGCACTGGCGGCGGCGAACAAGCGTGTATCTA
ACATCCTGGCGAAATCTGATGAAGTGCTGAGCGATCGCGTGAATGCCTCTACTCTGAAAGAGCCGGAAGA
AATTAAACTGGCGATGCAGGTTGTGGTGCTACGTGACAAGCTGGAGCCGTACTTTGCGGAAGGTCGTTAC
CAGGATGCGCTGGTCGAACTGGCTGAGCTGCGTGAACCGGTCGATGCCTTCTTCGATAAAGTGATGGTCA
TGGTTGATGACAAAGAATTGCGTATCAACCGTCTGACCATGCTGGAGAAACTGCGCGAACTGTTCCTGCG
CGTTGCGGATATTTCGCTGTTGCAGTAATAACGCCGTTATTAAAAAGCCTGCCATCTGGCAGGCTTTTTT
TATCGCTAAATAATACAGCAACCTTTAATAATCTTCTGCTGAATAAAGATTATCTCATATATTAATTTTA
TGAGATTTTTTTAGGATTATATCAAGGAGAAGAAACGAACTTATTAAGCTAGAATAGCCACGGGTGCTTG
AGACTGTTTGTCTCAGGTATTCACCGAAAGGCAGACAGAGAAAAGCCCCACCTGACTATAAATCAAAGTG
AGGCCCCTCTATGCATAGACACCATAAGGTTAGCCTCTTACTCGTTGGAAATCAACACAGGGGGCTGGGA
ATGCCGCAGAAATATAGATTACTTTCTTTAATAGTGATTTGTTTCACGCTTTTATTTTTCACCTGGATGA
TAAGAGATTCACTGTGTGAATTGCATATTAAACAGGAGAGTTATGAGCTGGCGGCGTTTTTAGCCTGCAA
ATTGAAAGAGTAAGCGTCTTCGGCGGGAAATTATTCCCGCCTTTCTTACGGTGTTGCGCATTCTCATTGC
ACCCAAATTTATTCTTCACAAAAATAACACTAGATTCTATTACGCGATCGATTATTTATTTCCTGAAAAA
CAAATAAAAAAATCCCCGCCAAATGGCAGGGATCTTAGATTCTGTGCTTTTAAGCAGAGATTACAGGCTG
GTTACGTTACCAGCTGCCGGGCCTTTAGCGCCGCTTTCGATGGTGAAGGACACTTTCTGACCTTCGTCCA
GAGATTTGTAACCATCGTTCTGGATAGCAGAGAAGTGTACGAACACGTCTTTAGAGCCATCGTCAGGAGT
GATGAAGCCGAAGCCTTTGTCAGCGTTGAACCATTTTACGATACCAGTCATTTTACCGGACATAGTGTAT
TACCTTTAATAATTAAGTGTGCCTTTCGGCGATATGGCGTGCTTTACAGATTTTGAAGCGTTAAAGGAAT
GTGCACTACGAGGGGTATCAACGATAACTCTTGAAGGGACTTGCCTTACTACACTGCTTTAATGGTCTGT
ACGTCAAACCGTTGATGTGCATTAAGCCACGCATTGGCGGGTGATGCAACAATTATTTTTCATATTTATG
ATTAATCGGTTGGAAAACGGTCCTGTTATCAGGACCGTAAACAGCAATAAAGTGGATAAAAGTCTATTCC
ATCAACTGCTTACTTAATGCCGGGTTGGCTTGAATCAAACGCATCAATTTTAGTTCGGCACTTGAAGGCT
TCACGCGTCTGGATTCCCATTCCTTTACCATGGCGACTGATACGCCCAAAACCCGGGCAAAATCATCGAT
TTTTAATCCTGTCCCTTTTCGTAACTGCTCAATTTCGGTACAGGATGTTGTTCTGTGCGTCAGGGTAATT
TTCTGCGTTTCATCTTTAAAAACAATCTGTTCCAGGCTGCTCAACAGCTCATGCATTGGATCTTTATATT
CCATTGAAAACTCCTCAAATCACACTGCGGGATCGTGAATTGCATCGAAGCTCATTAAGAATAGTCGGGA
AAAACAGACACAGCGGGGTGTAGTCAGGGCATACTCTGACTATGATTCGATTCAGCCAGTCATTTAGCGT
GACTTATAGCCACCTAACGATCTGATAAATGCCGATATATCTCTTACCACTCCCGGTTTGTAAAGATTTC
GAAAATCTAACGTTCTGCGAAGGCGTAAATCTCTGGCTACAAAAAAGGCAACGGCAATATCATTTTTTAA
CAATGAAACAACAAATTAACCTTGTTTCATTTTCTCCATGATTTTACCAGGAAGATTACGTAGAAAGGGT
ATCCTGCAAGCCTGTCCTGGACTATCCTTGTCACGTCAGACACGCGTGTGTCGTTGTGCGCTTTTTTTGG
GTGAAAGGAGTAAGAAAATGGCGACAGGAAAGTCCTGCTCTCGCTGGTTTGCGCCTCTTGCGGCGTTATT
AATGGTAGTTAGCCTGAGTGGGTGTTTTGATAAAGAAGGCGATCAGCGTAAAGCGTTTATCGACTTCCTG
CAGAATACAGTGATGCGTAGCGGTGAACGTCTACCAACCCTGACTGCCGATCAGAAAAAACAGTTTGGTC
CTTTTGTCTCTGATTACGCGATTCTGTATGGTTATTCTCAGCAGGTGAATCAGGCGATGGATTCCGGTCT
GCGCCCGGTTGTAGACAGCGTTAACGCAATTCGCGTACCGCAGGATTACGTTACGCAAAGCGGTCCGCTG
CGTGAAATGAACGGTTCGCTGGGTGTGCTGGCGCAACAGCTGCAAAATGCGAAGTTGCAGGCCGATGCTG
CGCACTCTGCGTTAAAACAGAGTGATGACCTGAAACCGGTCTTTGATCAGGCATTCACCAAAGTGGTAAC
GACGCCAGCTGATGCATTGCAACCGTTGATTCCGGCGGCACAAACTTTCACGCAACAACTGGTGATGGTT
GGAGACTACATTGCTCAGCAAGGTACTCAGGTGAGCTTTGTCGCAAATGGCATCCAGTTCCCGACGTCAC
AGCAGGCAAGTGAATATAACAAACTGATTGCGCCATTACCGGCACAGCATCAGGCGTTTAATCAGGCCTG
GACTACAGCAGTTACTGCAACCCAATAAAGAGTAAAAGCCCGAGCGATTATCGGGCTTTACTCCACGCAG
TCGCGGCTTAGTCCGCGACGTGCGGATTCACACAGTTCTTCTCAACCTTTCCTTGTAACGCATCAATCAA
ATTATCCACGGCACAGGCGGCCATGCCATAACGCGTCTCATGAGTGGCAGATCCAATATGCGGTACTGCG
ACGACGTTGGCCATTGAGAGCAACGGCGAATCTACGGACAGTGGCTCTTGTTCGAAGACATCCAGCCCGG
CGGCGTGAATTTCCCCTTTCTGCAATGCAGCAATCAGTGCATTTTCATCAACCACCGGGCCACGTCCGGC
ATTAATGAAAATGGCGGAGGATTTCATTTTGGCGAATTGTTCTGCGCCAAACAGATGATGCGTTTCATCA
GTTAACGGCAGGATCAGGCAAACGAAATCTGACTCTTGTAACAGTGTATCCAAATCGCAGTAGCGGGCGT
TGAAGCGTTCTTCTGCTTCTTTATGGTGGCGGCGCGCGTTATAGAGGATGGGCATATTGAAGCCAAAGTG
CGCACGTTGTGCCAGCGCCATGCCGATCCGTCCCATCCCGACAATGCCCAGTGTTTTATGGTGAACGTCA
GTGCCGTACCAGTCCGGGCCTATGCTCGCGGTCCATTCGCCTGCTTTTACCCGTTCTGCTACCTCCACAA
CCCGACGAGCGGTAGACAACACCAGCGCCATCAGCGTATCGGCGACGGTTTCTGTTAATACGGTTGGTGT
GTGCATCAGCAGAATTTTTCGGGCGGTAAGCGCATCGACATCAAAATTGTCATAGCCGACGGAGATCGTT
GATGTGGCACGCAGTTTCGGCATTTTTTCCAGCAATGCGGCATCAACATTCTCGTTTGAACCCAGCAAGC
CTTCTGCTTCGGCAAAAATTGCTGCATTTTGTTCGACGGTTTGTGGGCTGAGGTTTGCCACCTGGTGAAC
GGTGAAATGTTCTTGCAGGCGTTGCAGTAAATCATCAGGTAAGGCTTTGTAGAGGATAACGGACGGCTTC
ATGCTTCTCTCCATTCACTGATAAGGCGATCACCTTAGCCTGAAATATGATGAAGGAAAACTGAAGAATG
CCAGGTGATTTCTGCATCACCTGACATGAAAGGGATTACAGTGGGCTTAAGGTAATTTCTACACGGCGGT
TTTGCGCCTTACCTTCTGCGGTGCTGTTGCTGGCGATTGGGTTAGCCGGGCCAAGGCCCTGAGTACGGAT
GCGGCTGGCGTCCACGCCCTGGGTGATCAACGCGCTGGCAACGGAATCCGCACGCTGCTGGGAGAGACGC
ATGTTCAGGTCGTGACCCCCCGTGCTGTCGGTATAACCAATCACGTTAACCGCCGTTTTCGGATACTCTT
TCAGTACCATTGCCACGCCGGTCAGGGTGTTAGCGCCCGCCGGTTTCAGGGTTGCGCTGCTGCTGTCGAA
GGTCACATTGTTCGGCATATTGAGGATAATGTTATCCCCGCTGCGGGTTACGCTAACACCAGTGCCGCGC
ATTTTGTCACGCAGCTTCGCTTCCTGCACATCCATGTAATAACCAACGCCGCCGCCCAGAGCTGCGCCTG
CTGCTGCGCCAATGAGCGCCCCTTTACCGCGATCTTTCTTCGAAGAAGAGAGCGCACCAATACCCGCGCC
AACGAGAGAGCCCAGACCTGCGCCGATAGCAGATTTACCTGCTTCGCGTTCGCCGGTGTAAGGGTTAGTT
GTACAGCCAGATACCGCCAGAGCGCCACTCACTACGGCGGCAATAAGATAAACACGTTTCTTCATTGTTA
ATCCTTAATAACCTTTTTATTCTTTGCCACGGGTTCCGTGGCGGGAGATTATGCCGCGTGAGCATGAAGA
TTATTCCTGGGAATACTCGGAAATTTGTAAGTAATATTTAACTGCTCAATACATCTAACCTTTCAGGAGT
CTTCGGTTTGGCCAACTCATCCTCACGATATTCCGTTCTGACTGCCGCCCACTGGGGGCCTATGCTGGTT
GAAACCGACGGCGAAACCGTGTTTAGCTCGCGTGGCGCGTTAGCCACAGGAATGGAAAACTCCTTGCAGA
GCGCGGTTCGCGACCAGGTTCACAGCAATACGCGGGTGCGATTTCCAATGGTGCGCAAAGGCTTTCTTGC
GTCACCGGAAAATCCGCAAGGCATTCGTGGGCAGGATGAATTTGTTCGCGTGAGTTGGGATGAGGCGCTG
GAGCTTATTCACCATCAACATAAACGCATTCGTGAGGCTTATGGTCCGGCATCGATTTTTGCTGGTTCCT
ACGGCTGGCGTTCAAACGGCGTGCTGCATAAGGCCTCGACATTATTACAACGCTATATGGCGCTGGCAGG
CGGTTATACCGGGCATCTGGGGGATTATTCGACCGGCGCGGCACAGGCGATCATGCCGTATGTCGTGGGT
GGCCGCGAAGTTTATCAACAGCAAACCAGTTGGCCGCTGGTGCTGGAACATAGCGATGTCGTGGTGCTGT
GGAGTGCTAACCCACTCAATACGCTGAAAATTGCGTGGAATGCATCCGATGAGCAGGGGCTTTCTTACTT
TTCCGCACTGCGTGACAGCGGGAAAAAGCTGATCTGCATTGATCCAATGCGATCGGAAACCATCGATTTC
TTTGGCGATAAAATGGAGTGGGTGGCACCACACATGGGCACCGATGTTGCGTTGATGCTGGGGATCGCCC
ATACGCTGGTGGAAAATGGTTGGCACGACGAAGCGTTTCTGGCGCGTTGCACCACAGGTTATGCCGTCTT
CGCCTCTTATTTGCTGGGCGAGAGTGACGGTATAGCGAAAAACGCCGAATGGGCGGCAGAGATTTGTGGT
GTTGGCGCAGCGAAAATCCGCGAGCTGGCGGCTCTTTTCCACCAAAACACGACCATGCTGATGGCCGGCT
GGGGAATGCAGCGCCAACAGTTTGGTGAGCAAAAACACTGGATGATCGTCACGCTGGCGGCAATGTTGGG
GCAAATCGGCACACCCGGCGGCGGTTTTGGTCTTTCTTATCATTTTGCCAATGGTGGTAACCCCACTCGG
CGTTCTGCGGTGCTCTCTTCCATGCAGGGCAGCTTGCCGTGTGGCTGCGATGCGGTGGATAAAATCCCTG
TTGCCCGCATTGTTGAAGCACTGGAAAACCCTGGTGGCGCATATCAACACAACGGTATGAACCGACATTT
CCCGGATATTCGTTTTATCTGGTGGGCGGGCGGTGCCAACTTTACTCATCATCAGGATACCAATCGCCTA
ATCCGTGCCTGGCAAAAACCGGAACTGGTGGTGATCTCCGAATGTTTCTGGACGGCGGCGGCAAAACACG
CGGATATCGTTCTGCCTGCGACTACCTCTTTTGAGCGTAATGATCTCACCATGACCGGTGATTACAGTAA
TCAGCATCTGGTGCCGATGAAGCAAGTGGTGCCGCCACGCGATGAAGCGCGTAATGATTTTGATGTTTTT
GCCGACTTGAGTGAACGTTGGCAGAAGGGCGGTTATGCACGTTTTACGGAAGGAAAAAGTGAGCTGCAAT
GGCTGGAAACGTTTTATAACGTTGCCCGGCAGCGCGGGGCAAGCCAGCAGGTTGAATTGCCCGGGGCATC
CAATGTGGCTGGCGCCGGACGAATGGCAGGGCAGTGCCGAACCGGAACAGTTGCAGGTACTTTCTGCTCA
TCCGGCGCATCGTCTGCACAGCCAGCTGAATTACAGTTCTCTGCGCGAATTGTACGCGGTGGCAAATCGT
GAGCCTGTCACCATTCATCCTGACGATGCCCAGACGCGCGGCATACAAGATGGCGATACTGTTCGGCTGT
GGAACTCACGCGGGCAAATTCTTGCCGGCGCGGTCATTAGCGAGGGAATTAAACCTGGCGTGATTTGTAT
TCACGAAGGCGCATGGCCGGATTTGGATTTAACCGCTGGCGGCATTTGTAAAAACGGCGCAGTGAACGTG
CTGACCAAAGATCTCCCCAGCTCGCGGCTGGGGAATGGCTGTGCGGGTAATACGGCGCTGGCATGGCTGG
AAAAATACAACGGTCCGGAACTGACACTTACAGCGTTTGAACCACCGGCCAGCTCATAATCCAGGTGGGT
AGTTGGGTTTCATCCTGCCATGCGCAATCGACAATGTGAAAACCCTGCGCATGGTAGAAATCTATCGCCG
GTTGATTTTTTTGATAAACCTCCAGCATCAGATGGGGATAGCGCTGCTGCACATATTGCATCAGCGCCTT
ACCAATACCGCGTCTGACGGCCTTTGGTGCGACAAACATTGCTGCCAGAAATCGGCCTTCCATAATGCTG
ACAAAACCGAGAAGCTTACCGTCTTCTTCCCAGACCCAGTTTTGCGCGTTGGCAAGATACGCATCCCGCA
CCAGCGGAATGCAGTCACGCCAGTAATTCGCTTTTATAAAGGGATGCCCCCAGGTTGTACTTTCCAGCCA
CAGTTCGAGGATCGCGGGGAGTTCTGAACGTTGCGCTTCCCGAATCATGGTTTATTTCCCGGATAGCAAC
AGCAGCCAACCACATGATCATTCACCAGCCCACATGCCTGCATAAAGGAGTAACAGATTGTGGTACCGAC
AAACTTAAAACCACGTTTTTTCAGTGCCTTAGATAGGGCGTCGGAGGCGGGCGTAGATGTGGGGATTTCG
CTCAACGTTGTGGCTTGTGTCACCTGTGGTTGATGATTGACAAACGACCAGACAAAGTCGGCAAACGGTT
CGCCGTTCTGTTCCATTTGCAGGTACGCCTGCGCATTACCAATAATTGCCTGAATTTTCCCACGATGGCG
GATAATCCCGGCGTCCTGTACCAGTCTTTCGACATCCTCTTCCTGCATTGCGGCAACTTTCACCGGATCG
AACTGATGAAAGCATGCGCGATAGTTTTCGCGTTTTTTGAGGACGGTGATCCACGATAATCCAGCCTGCT
GCCCTTCCAGGCAGATCATTTCGAACAGTTTTTTACTGTCAGTTTCAGGCACGCCCCATTCATTATCATG
GTAGGCAATATAAAGCGGGTCCTGACTCACCCAGCCGCAACGTTCCATACTTTCCCTCGCTATGTACCCG
ATCGTAAAAATTTCAGCCGCTTTTCTTGACGCATCGGTGAAAAAGTCAATATTTAATACAGGGCTACTAT
GCCCGATATCCTTCATACAATGACAATAATATTGCCGAATTCGGCTCTTCCCTGGAGTCGTGTTAATGAT
CATAAAAAAAAGCGGTGGTCGCTGGCAGCTAAGCCTGCCTGCTTGCGAGCGTGGTAATCAGTGCCTTTTT
TCTCAACACAGCTTACGCCTGGCAACAAGAATATATCGTTGATACGCAACCCGGACATGCCACAGAGCGT
TACACCTGGGATAGCGATCATCAACCTGATTACAACGATATTTTGTCGCAACGTATTCAAAGTAGCCAAA
GGGCGCTGGGACTGGAAGTCAATCTGGCGGAAGAAACCCCTGTGGATGTGACCAGCAGTATGAGTATGGG
CTGGAATTTTCCTTTATATGAGCAGGTTACAACTGGCCCGGTCGCGGCATTACATTACGATGGCACAACC
ACCTCGATGTATAACGAGTTTGGCGACAGTACTACCACGCTGGCCGAGCCGTTATGGCATGCCAGCGTGA
GTACCTTAGGCTGGCGTGTTGACTCCCGGCTTGGCGATCTCCGACCCTGGGCGCAAATCAGCTATAACCA
GCAATTTGGCGAGAATATCTGGAAGGCGCAATCAGGCCTGAGCCGGATGACGGCGACAAACCAGAACGGC
AACTGGCTGGATGTCACCGTAGGCGCTGATATGTTGCTCAATCAAAATATTGCTGCCTATGCTGCGCTAT
CTCAGGCAGAAAATACCACTAACAATAGCGACTATCTGTATACGATGGGGGTTAGTGCCAGATTTTAACA
TTATAGATACAATTAAAAGCCATAAATAACAACTAATGTGGCGATAGTGGGGACTAACTTACTAAATAAT
AAATTTGGCGAATAATTGTCGAGTCATTCATTCCTGAACTAATGCATTTCATTCCGTTCTGATGGCATTT
CATGCCGTTTTTCCCCAGGCATAAAGCGCACTTCGTTATGGTTGTCAGCAGAGATTTTTCCTTTTTATTA
CTGCAGGAATACTGCCATGACACCTTCAAATTATCAGCGTACTCGCTGGCTGACACTCATCGGTACTATC
ATTACCCAGTTTGCTCTGGGGTCGGTTTATACCTGGAGTCTGTTTAACGGTGCGCTTTCTGCCAAGCTGG
GGGCTCCTGTAAGCCAGGTTGCTTTCTCTTTCGGCTTGTTAAGTCTGGGGCTGGCAATTTCGTCTTCTGT
TGCGGGCAAATTGCAGGAACGTTTTGGTGTTAAACGCGTCACTATGGCTTCCGGCATTTTGCTGGGATTA
GGTTTCTTCCTGACAGCACATTCCAACAACCTGATGATGCTGTGGTTAAGCGCCGGTGTGTTGGTTGGTC
TGGCGGATGGTGCGGGTTACCTGTTGACGCTCTCTAACTGCGTGAAGTGGTTTCCGGAGCGTAAGGGACT
TATCTCTGCTTTTGCTATCGGTTCTTATGGTCTGGGCAGCCTGGGTTTTAAATTTATCGACACGCACCTG
CTCGAAACGGTGGGTCTGGAAAAAACCTTTGTTATTTGGGGCGCGATTGTACTGGTGATGATTGTCTTTG
GCGCAACGTTAATGAAAGATGCGCCGAAGCAGGAAGTGAAAACCAGCAATGGTGTGGTGGAGAAGGACTA
CACCCTGGCAGAGTCGATGCGTAAACCGCAGTACTGGATGTTAGCGGTTATGTTCCTGACTGCGTGCATG
AGTGGTCTGTATGTGATTGGTGTAGCGAAAGATATCGCTCAAAGTCTGGCGCATCTTGATGCAATTTCCG
CAGCCAATGCTGTGACGGTTATTTCCATCGCCAACCTTTCTGGTCGTCTGGTGCTGGGCATTCTGTCTGA
CAAAATTGCCCGTATCCGTGTTATCACCATTGGTCAGGTGATTGCGCTGGTGGGTATGGCGGCCCTGCTG
TTTGCACCATTGAATGCAGTGACGTTCTTTGCAGCGATTGCCTGTGTGGCATTTAACTTTGGTGGCACGA
TTACTGTGTTCCCGTCACTGGTCAGTGAGTTCTTCGGCCTCAATAACCTGGCGAAAAACTACGGTGTGAT
TTATCTCGGTTTCGGTATCGGCAGCATTTGTGGGTCGATTATCGCCTCACTGTTTGGCGGCTTCTATGTG
ACCTTCTACGTGATTTTCGCCCTGCTGATTCTGTCACTGGCGCTCTCTACGACGATTCGTCAGCCAGAAC
AGAAAATGTTGCGTGAGGCTCACATATAAAGATATTGCACTATTTATGAATTAAGGGGGGAGGCAATCCC
CTCTTTTTTTGCATATTAATACATCGAAATAAAACAATAGCCTCCAATATTATCCATCACATGAATATTT
TCATGAAATTATATTAATATTTTGTATTGATATATTCCTAAAAAACAAAATAACTTTTTATGCTAAAGCG
TAACTATGTGATTACAAATACATTTCATAAAATGTCTCACTATTAGCATTTTATGTATTTAATTTCTTTT
TTCACATTTATTCGTATAATCCAGTCCTCAAAATTGATGCTTTTCTGAATCATCAATATTTGCTATTTAT
TGTGTTTTTTTAAATGGAGTTTTTCATGAAAAAGGTTATTTTTGCCTTGTCTGCACTGGCATTAACTTCT
GGTTCTGTCTTCGCTGCTGATTCTGGTGATGGTACTGTTAAATTTACTGGTGAGATCGTAGACGCAGCAT
GCGTACTGTCTGTTGATTCTCAGAACCAGGAAGTTGTTCTGGGACAGGTTCAAAAATCTGTGTTTGCTGC
AGTTGGTGATAAATCACCATCAAAACCTTTCGAAATCAAGTTGGAAGATTGTGATATCACCACTTTGAAA
AAGGCGAAAGTCAGCTTTAGTGGCGTTGGTGATACCGATAAACCTGAACTTATCTCTGTTAGCACCGAAG
CAGGCGCGGCGAAAGGCGTAGGTATCGGTATTTATGATAACAGCAACACCCTGGTTGCGATGAATAGTGG
TGAATCCAGCACTGACCTGAAAAAAGGTCAGACAGTTCTTTATTTCACCGCAAACTATGTTTCTACTTTA
GCTGCTGTAACTACTGGTTATGGTAATGCTCAGGTTGATTTCAATCTGTCTTACGAGTAATAGTTAGTTT
CACAATTGGCGAAGATGAATTCTCCGCCAATTGTGTTCAACGTTCATGGATAGAATGATGAAAAAAAATT
CATTGCGTTAACTCTTTGGGTGTTAATTTCGCAGTCTGCACTAGCGAGTGGGGTTGGGCTTAGTTCTACT
CGGGTGATTTATGACGGTAATAAGAAAGAAGCATCGCTAACCGTACAAAACAAAAATAAATCAGAAGAAT
TTCTTATTCAGTCATGGGTTGATGATGCAACGGGTAGTAAAAAAACACCATTCATCATTACTCCGCCATT
ATTCAAACTTGAGCCAGGAAAAAACAACATCTTACGTATCGTAAATGTGAATCCGTCCTTACCTCAGGAT
CGTGAATCTGTTTACTGGGTAAACGTCAAAGCGATTCCTTCTCAAAATGAAGAAAATGAAGGGAAAAATG
TCTTGCAGATTGCAGTTCGTACTCGCATCAAGCTTTTTTATCGTCCAGCAGGTCTAAAAGGGGATATTAA
ATCTTCGCCAGGAGAACTACGTTTTACGCGAAACGGTAAACAGATAAAAGTTGACAATCCAACTGTTTTT
AACATCACGTTCAGTGATGTATTTATTAACGGACACGAAATTGAAAAGTCCGGTATGGTGCCAGCTAAAG
GGGCTTTGAATATCTATTTGCCTGCAGGTGTGAACAGTGCTTCGCAAATAAAATATAATACAATTAATGA
TTTTGGCTCTTCAGGTGAATATCTGACTCGCGAAATTAATTAATAGTTTTCAGGGGAACCAACTTAATGT
CATGGATGGTCGTTTCGCGCACTTACACTTCTTTTTTTCCCTTTTCTTTATCTGTATTGGCGCTTACGGT
TGCAGGCTCTTTTTCTGCGACAGCTGGAAAATTTAATCCGCGTTTTCTGGAAGATACCGCAGGGATCAAC
CAGCATGTTGACCTTTCCATGTACGAAACTGACCATGGCGCGCAGTTGCCTGGAACATATCGCGTTTCTT
TAATCGTCAATGAACAAAAAATGGAAACGCGCACTCTGGAGTTTAAGGCGGCTACAGAATCCCAACGAAA
GGAGATGGGGGAGTTTCTCATACCTTGTTTAAGCCGGACACAACTGGCCGATATGGGCGTTCGTGTAGAC
AGTTTTTCAGCACTTAACCTTATACCAGCAGAAGCCTGTGTGGCGTTTAATGAAATTATCCCTCAGGCGA
CCAGTCATTTTGATTTTAGCGAACAAAAACTGGTGATGAGTTTTCCTCAGGCGGCAATGCAGCAGGTTGC
TCGCGGTACAGTACCTGAATCTCGCTGGGACGATGGTGTGCCCGCGTTGCTTCTTGATTACAGTTTCAGC
GGTAGTAACAGTTCTCATGATACAAAAAGTTATAATCGCTACATTGATGAAAATGGTAATCATCACCAGG
ATAAAAACGAAACTAGCCAGACTAACGATAGCTACTACTTAAGTATGCGAAGCGGCCTTAACCTTGGGGC
ATGGCGTCTGCGAAATTACAGTAACTGGAGCTATAGTAACGGCGAGAAGCAGTGGGACAATATTGGCACC
TATGTAACACGGGCCATTGTTCCGCTGAAAGCGCAACTGACATTGGGTGATACAGCAACACCTTCAGATA
TTTTTGACAGTGTGCAGATGCGCGGGGCATTACTGGCCTCTGATGAAGAAATGTTGCCAGACAGCCAACG
TGGTTTTGCTCCGGTAGTTCGAGGGATAGCGAAAAGTAACGCGGAAGTCAGTATTGAACAAAATGGTTAC
GTGATTTATCGAGCATTTGTCCAGCCAGGTGCGTTTGAAATTAACGATTTATACCCCACAGCGAACAGCG
GTGATTTAACCGTAATTGTTAAAGAGGCTGATGGTAGTGAACAAAGATTTATTCAGCCATTCTCTTCAGT
CGCTGTTTTCCAACGTGAAGGGCATCTCAAATATAGCCTTTCTGCTGGTGAATACCGTGCTGGTAATTAC
GATAGCGCCAACCCACGCTTTGGTCAGTTTAATGCGATGTATGGTTTACCGTTTGGTATGACCACCTATG
GTGGCGCATTAATTTCTAAGGATTACAATGCATTTGCTCTGGGATTGGGAAAAAACTTTGGCTCTATTGG
TGCAATATCGGTTGATATTACTCAGGCAAAAAGTACATTAAATAATAATGCAACCGATCAGGGACAATCG
TACCGCTTTCTTTATTCAAAAAGCTTTGCCAGCGGCACAGATTTCCGTTTATTGGGTTACAAGTATTCTA
CCAGTGGTTTTTATACCTTCCAGGAAGCAACAGATGTGCGTAGCGGTGCTGACAGCGATTACGGCCGTTA
CCATAAGCGTAGTGAAATTCAGGGTAATTTGACACAGCAATTGGGCACCTATGGGTCGGTTTATTTCAAT
ATGACCCAGCAGGATTACTGGAATGATGACGGTAAGCGCCTTTCTTTGGCTACCGGGTACAACGGCCGTA
TTGGACGTGTTAATTACAGTATTGCTTACAGTTGGAATAAAAGCCCTGAATGGGATGAAAACGACCAGTT
ATGGTCATTTAATATTTCTATTCCGTTTGGTCGGGCATGGAGCAACTACCGCGTGACAACCGATCAGGAT
GGCCGCACGATACAACAGCTCGGCGTCAATGGCACTCTGTTAGAAGATCGCAATCTTAGCTATAACGTTC
AGGAAGGGTATTCCAGTAATGGTGTTGGTAATAGCGGTAATGCCAGTTTGGCGTACCAGGGCGGCGCCGG
TAATATCAGCGTGGGTTACAGCTATGGTAAAGACTACCAGCAGACTAACTACAGCCTGCGTGGTGGCATT
GTAGCGCACAGTGAAGGGATCTCGCTTTCCCAACCTTTGGGTGAAACAATTGCTATAGTTTCAGCACCAG
GTGCCCGGGGGGCGAAAGTATTAAATAATAGTGGTGTGAGTGTTGACTGGCAAGGTAATGCGGTCGTTCC
TTATCTGAGTATTTACCGTGAAAATGATGTGTCCATTCGCAGTGAAACGTTGAATGACAGTGTTGATATG
AACAGCGCATTCCAGACAATTGTGCCAACTCGAGGAGCTGTCGTACGGGCGCATTTCGATACCCGTGTGG
GTTATCGAGTTCTTATGACATTAATTCGGCAAAATGGAGTGAGCGTCCCCTTTGGTGCAACTGCAACGCT
GGTTTCAGATACAACTGAACAGATTAGCGGTATTGTTGGTGAAGATGGTCAGTTATATATCAGTGGGATG
CCTAAAACAGGGAATGTGAAGATCGTATGGGGTAAAGATACGTCACAACAATGCGTTGCGAAATATGAAC
TACCGGTTGAGGAAAAAAATTCCGGTATTATTTCCGTGACAGCAAATTGTCAATAAACAAGGAGGTATAA
CATGATAAAAATATTAAAGCTATTTGTTTTCTGGAGCATATTGTTTACGGCCAATAATGTTATGGCTGCA
GATTGGGGACCCTGTACATCTACATCTGGGGTACATGACTACCCAGTAAATTTTGATGTTAAAATAGCAG
ATTCCAGTAAAAATACTGCAGGTACAGAATTAAAACTTATTTATTCATGGAATGGGGTTGGGCAACCCTT
TAGCTTTATTTGTGAGTGCCCTGATACCTATAAAACTGAAAAAGACACATATGTTAAAGTTGAGAGTGGG
TTATCGACTAAAACACGAAAAATAAATAGTGAGCAATACTACCAGTTGACACCCGAACTGGAAGTGATGA
CCATGATTCAAGGTCCAAGTATGTTGTTCCGCGTTCCAGAGGCCAATGCGCAGGTTCCCAATTTAAATAA
TGCTTCTCAAGACTGTAAAGGCAATAATCTGGGGCAATTTGGCAGTAATGGCTATCTGTCATTCTATATA
GCAAAGCCTGTTCAGGGTGAGGTGGAAATTCCCTACACGCTTATTGCAACACTGTATGCCTCAAAGAAAA
AAAATACATACAGGGATCCACTTTCTACGGTCAGTATTGCAGGGAAATTGACCTTTACACAAGGTTGTAA
AATTGACGCCGGTACGGTATTGGATGTCCCCTTCGGAGAGTACCCATCTTCGGCGTTTAAAAATAAAAAA
GGAATCATTCCAGTTGGAGGAACTGAAAAAGAGATTAATCTCCAGTTCGATTGTGAAAATATTACCAATG
GCATTCAGGTATCTCTAAGGATTGAAGGAAACACAAGTCAGGCTGACGAGCGGGCCATCGATATGGGTAA
CCCAGACATTGGTGTGTTGGTTATGGATCCAAACGGCAATGTCTTAAAGCCTAACGATACCAACAGCAGT
GTTAACTTAAACCTCGGTCCGATCGATTCCCAACAACATCGCGATGCAACAATTAAACTGAAAGCAGCAC
CAATCAGCACGACCGGAAATGCTCCAGCTGCAGGGCAATATAGTGGGGTTGCAACAATCTTTCTGGATAT
GGATTAGTCATCATGTGGAGAAATAGTATACGTTGCCTGTTGCCCTTTTTAGCTCTGGCATATTTTCCCG
GCGCTGAAGCCAAAATAAGCCTCGGTGAAGCAGGAAAACTGACGTTTTCTCTTTCAGTCGTGGCCAAAGG
GTGTGAGTTTGACGCCACTGATTTAGAAGTTGTCATGGGGAAAATGATGTTAATGAAGCCAGTCACGGTC
GGAAGAGTCATAAACGAAAAAAATTTCGTAATCGAATTAAAAGATTGTGACGGAATATCAAAAGCTAAAG
TAACAATGGACGGCCTTCCTGACACCAATGATAACTCTCTTTTTGCTCTGGATGCCGGAGGCGCAACGGG
AATAGCCCTGCAAATTGTTGACGGCAAGGGCACAAAACAGATTCCGAAAGTCGCTGGTGGAACGGCGATA
GAGTGGCCAGTAAATGGAACAACAACCCAACTGAACTACAAAGCGAGTTATGTCGTTGTAAACGCCAATG
CAACGTCTGGACATGCAAATGCCATGGTCAATTTCTCCGTGGAGTATGAGTAACCAGTTTCGGACTTTTG
GCAGAAAAAGAGGAGATTACTCCTCTTTTTTACAAGAACAGTTAATTATTGGTCTGCATTCTGACTTGCT
TTTTGTAAATATCTGTAGCTAAAACTCACTTCATTGCCACTTTTCCTTCTCTCTGTGGTCTACTTAACGA
CATGAGCAGGGGATGGCGTTCACTACTCCTGCATTTTTTCCTGATACTCCCACTGCAAAAACGGAGTGCT
GGATATTTTTTCCCCTTTATCCCAGGGTTTGTTTGCATGAGATACATCAAATCGATTACACAGCAGAAGC
TGAGCTTTTTGCTTGCAATCTATATTGGCCTTTTTATGAATGGCGCAGTTTTTTACCGCCGCTTCGGCAG
CTATGCGCACGATTTTACCGTCTGGAAAGGCATTTCTGCTGTTGTTGAACTGGCCGCCACCGTACTGGTG
ACCTTCTTTTTACTGCGTCTTCTTTCGCTGTTTGGCCGCCGCAGCTGGCGTATTCTGGCATCGCTGGTGG
TGCTCTTTTCCGCAGGTGCCAGCTATTACATGACCTTCCTTAATGTAGTCATTGGTTATGGCATCATCGC
ATCCGTCATGACCACCGATATCGACCTGTCAAAAGAAGTTGTTGGTCTGAACTTTATTCTCTGGTTAATC
GCCGTAAGCGCGTTGCCTCTTATCCTTATCTGGAATAACCGCTGTCGTTACACCTTGCTCCGACAACTGC
GAACCCCAGGGCAACGTATTCGCAGCCTGGCGGTCGTCGTACTGGCAGGTATTATGGTTTGGGCACCGAT
TCGTTTGCTGGATATCCAGCAGAAGAAAGTGGAGAGGGCGACAGGTGTTGATTTGCCGAGTTATGGCGGC
GTCGTCGCGAACTCTTATCTGCCATCAAACTGGCTTTCGGCATTAGGTCTTTATGCCTGGGCGCGGGTCG
ATGAATCTTCCGATAACAATTCTCTCCTTAACCCTGCGAAGAAGTTTACGTACCAGGCTCCACAAAACGT
TGATGATACATATGTCGTTTTCATTATTGGTGAAACCACGCGCTGGGATCATATGGGCATTTTCGGCTAT
GAACGCAATACCACACCGAAGCTGGCTCAGGAGAAAAATCTGGCGGCGTTCCGTGGTTACTCCTGTGATA
CGGCAACCAAACTCTCACTGCGTTGCATGTTTGTACGTCAGGGTGGAGCAGAAGATAATCCGCAGCGCAC
ATTAAAAGAACAGAACATTTTCGCGGTATTGAAGCAGTTAGGATTCAGTTCTGATCTCTACGCTATGCAA
AGCGAAATGTGGTTCTACAGCAATACGATGGCGGACAACATTGCTTATCGTGAGCAGATTGGTGCGGAGC
CACGTAACCGTGGCAAGCCGGTAGATGATATGTTGCTGGTAGACGAAATGCAGCAATCGCTGGGGCGCAA
CCCGGATGGTAAGCATCTGATCATTCTGCATACCAAAGGCTCACACTTTAACTACACCCAGCGTTACCCG
CGCAGCTTTGCGCAGTGGAAGCCGGAATGTATTGGTGTTGATAGCGGCTGTACCAAAGCGCAGATGATCA
ACTCATACGACAACTCGGTGACCTATGTGGATCACTTTATTTCCAGCGTGATTGATCAGGTTCGCGATAA
GAAAGCGATTGTGTTCTATGCAGCTGACCACGGTGAGTCAATTAATGAACGCGAGCACCTGCACGGCACG
CCGCGTGAACTGGCACCGCCGGAACAGTTCCGTGTGCCGATGATGGTCTGGATGTCGGATAAATATCTGG
AAAATCCGGTCAATGCGCAGGCATTTGCGCAGCTGAAAAAAGAAGCCGACATGAAAGTGCCACGCCGTCA
TGTAGAGCTGTACGACACCATCATGGGTTGTCTTGGCTATACTTCACCGGATGGTGGAATTAACGAAAAC
AACAACTGGTGCCACATCCCGCAGGCAAGAGAGGCGGCGGCTAACTAAGAGGCCTGCTGACTTTCTCGCC
GATCAAAAGGCATTTTGCTACTAAGGGATTGACGAGGGCGTATCTGCGCAGTAAGATGCGCCCCGCATTC
GGTGATTGGCGCAGCCTGGTAGCGCACTTCGTTCGGGACGAAGGGGTCGGAGGTTCGAATCCTCTATCAC
CGACCAAATTCGAAAAGCCTGCTCAACGAGCAGGCTTTTTTGCATCTGTAACTCATGAGGAAGAGAACCT
CCGGGGGCGGGGAGGTTCGATTCGACGTAGGCCTGACAAGACGCGCCAGCGTCGTATCAGGCAAATGTGC
CGGCCCATTGTCGGATGCGGCGTGAACACCTTATTCGACCTACACACCACACATTTCCCTGCCAAATTTG
CGCCCCATATCTCACTATCCATTAACGGATTTGTGACAGAAACCATTGTCTTTTTTTATATTTGCTTAAA
TCTTTTTTTGCGTTACTTATGGCTGGCGCTGGCATTTTCCGCTGTGCGTTTTAGCGTTCATGGTATTAAT
CGCTCAGATATCCACCTTTTCCTCAGATTTTTTTCATTAAATGCATAAAACTTAATCACCAAATGTTGCT
AAATATTAAGCTGATTGTTCTGGTTGTGTTGGCGTAGCACAAATTTCTCTGCTGCAAATAGCTGTTTGAA
GTTTTTTTAATCTTTGTTTGTGGATTCTCACCGTTGGTGTAAATCCCGGTTGGCTGTATTGACGTTTTCA
CATTCTGTTGACAGATTGTAGATCACGAGGGGCATTTTATGGAGGATCCGCACTGTTACACTGATGTTAA
TTAGTACGGCATCCCCACCTCATAACGTTGACCCGACCGGGCAAAAAACAAAAAAGGTCAGGCAGCGACA
ACCCACTGCAAAGGGTTAAAACAACAAACATCACAATTGGAGCAGAATAATGCGTATTTCCTTGAAAAAG
TCAGGGATGCTGAAGCTTGGTCTCAGCCTGGTGGCTATGACCGTCGCAGCAAGTGTTCAGGCTAAAACTC
TGGTTTATTGCTCAGAAGGATCTCCGGAAGGGTTTAACCCGCAGCTGTTTACCTCCGGCACCACCTATGA
CGCCTCTTCCGTACCGCTTTATAACCGTCTGGTTGAATTTAAAATCGGCACCACTGAAGTCATCCCGGGC
CTCGCTGAAAAGTGGGAAGTCAGCGAAGACGGTAAAACCTATACCTTCTATCTGCGTAAAGGTGTGAAGT
GGCACGACAATAAAGAATTCAAACCGACGCGCGAACTGAATGCCGATGACGTAGTGTTCTCGTTCGATCG
TCAGAAAAACGCGCAAAACCCGTACCATAAAGTCTCTGGCGGCAGCTACGAATACTTCGAAGGCATGGGC
TTGCCAGAGCTGATCAGCGAAGTGAAAAAGGTGGACGATAACACCGTTCAGTTTGTGCTGACTCGCCCGG
AAGCGCCGTTCCTCGCTGACCTGGCAATGGACTTCGCCTCTATTCTGTCAAAAGAATATGCTGACGCGAT
GATGAAAGCCGGTACACCGGAAAAACTGGACCTCAACCCAATCGGTACCGGCCCGTTCCAGTTACAGCAG
TACCAGAAAGATTCCCGTATTCGCTATAAAGCGTTTGATGGCTACTGGGGCACCAAACCGAAGATCGATA
CGCTGGTCTTCTCTATTACTCCTGACGCTTCCGTGCGTTACGCGAAATTGCAGAAGAACGAATGCCAGGT
AATGCCGTACCCGAACCCGGCAGATATCGCCCGCATGAAGCAGGATAAATCCATCAACCTGATGGAAATG
CCGGGGCTGAACGTCGGTTATCTCTCGTATAACGTGCAGAAAAAACCACTGGATGACGTGAAAGTTCGCC
AGGCTCTGACCTACGCGGTGAACAAAGACGCCATCATCAAAGCGGTTTATCAGGGCGCGGGCGTATCAGC
GAAAAACCTGATCCCGCCAACCATGTGGGGCTATAACGACGACGTTCAGGACTACACTTACGATCCTGAA
AAAGCGAAAGCCTTGCTGAAAGAAGCGGGCCTGGAAAAAGGCTTCTCCATCGACCTGTGGGCAATGCCGG
TACAACGTCCGTATAACCCGAACGCTCGCCGCATGGCGGAGATGATTCAGGCAGACTGGGCGAAAGTCGG
CGTGCAGGCCAAAATTGTCACCTACGAATGGGGTGAGTACCTCAAGCGTGCGAAAGATGGCGAGCACCAG
ACGGTAATGATGGGCTGGACTGGCGATAACGGGGATCCGGATAACTTCTTCGCCACCCTGTTCAGCTGCG
CCGCCTCTGAACAAGGCTCCAACTACTCAAAATGGTGCTACAAACCGTTTGAAGATCTGATTCAACCGGC
GCGTGCTACCGACGACCACAATAAACGTGTTGAACTGTACAAACAAGCACAGGTCGTGATGCACGATCAG
GCTCCGGCACTGATCATCGCTCACTCCACCGTGTTTGAACCGGTACGCAAAGAAGTTAAAGGCTATGTGG
TTGATCCATTAGGCAAACATCACTTCGAAAACGTCTCTATCGAATAATTAAAAGCCATACAAGGTTGATG
GCAAACGCAAAACTGCCGGATGCGCTCCGCTTATCAGGCCTACGAGAGTTCTGCAATGTATTGAGTTTGC
ACGATTTTGTAGGTTGGATAAGGCGTTTGCGCCGCATCCGGCATAAACAAAGCGCTCTTTGTCAACAATC
TGCATACCCGGTGGTGCTGTGCCTCTGCGTGCAGCGCCATCCGGCAGCAATACTTCATTCCCTGTCCGAC
AAGGGCGGGAATTGATTTGTGAGCAATACAGACACGCAGTTCCAGGCTGCGGGTCACTATAGAGAATCCG
GGTTATGTTGCAGTTTATTCTCCGACGTTTGGGACTCGTCATCCCCACGTTTATCGGTATTACCCTTCTC
ACATTTGCCTTTGTCCACATGATCCCGGGCGATCCGGTGATGATCATGGCGGGCGAACGTGGGATCTCCC
CAGAGCGTCACGCGCAATTGCTGGCTGAACTCGGCTTAGATAAACCGATGTGGCAGCAGTATCTCCATTA
CATTTGGGGCGTAATGCACGGTGATTTAGGCATTTCGATGAAAAGCCGAATTCCGGTATGGGAAGAGTTC
GTGCCGCGCTTTCAGGCCACGCTGGAACTTGGCGTCTGCGCGATGATTTTTGCGACCGCAGTCGGGATTC
CGGTTGGTGTGCTGGCTGCGGTTAAACGTGGTTCCATTTTCGATCACACAGCGGTTGGCCTGGCGCTGAC
CGGCTACTCGATGCCAATTTTCTGGTGGGGCATGATGCTGATCATGCTGGTTTCGGTGCACTGGAACCTG
ACGCCTGTCTCCGGTCGCGTGAGCGACATGGTGTTCCTCGATGATTCCAATCCGTTAACCGGTTTTATGC
TGATCGACACCGCCATCTGGGGTGAAGACGGTAACTTTATCGATGCCGTCGCCCATATGATCCTGCCCGC
CATTGTGCTGGGTACTATTCCGCTGGCGGTCATTGTGCGTATGACGCGCTCCTCGATGCTGGAAGTGCTG
GGCGAAGATTATATCCGCACCGCGCGTGCCAAAGGTCTTACCCGGATGCGGGTGATTATCGTCCATGCGC
TGCGTAACGCGATGCTGCCGGTGGTGACCGTTATCGGCCTGCAGGTGGGAACATTGCTGGCGGGGGCGAT
CCTGACTGAAACCATCTTCTCGTGGCCCGGTCTGGGGCGCTGGTTGATTGACGCACTGCAACGCCGCGAT
TATCCGGTAGTGCAGGGCGGCGTATTGCTGGTGGCGACGATGATTATCCTCGTCAACCTGCTGGTCGATC
TGCTGTACGGCGTGGTGAACCCGCGTATTCGTCATAAGAAGTAAGGGGACATCATGTCACAGGTTACTGA
AAATAAAGTGATTAGCGCACCGGTGCCGATGACCCCGTTACAGGAGTTCTGGCACTATTTTAAACGCAAC
AAAGGCGCGGTTGTCGGGCTGGTTTACGTCGTCATCGTGCTGTTTATCGCGATCTTTGCCAACTGGATTG
CACCCTATAACCCAGCGGAACAGTTCCGCGATGCGCTGCTCGCGCCGCCAGCCTGGCAGGAAGGCGGCAG
CATGGCGCACTTGCTGGGCACCGACGACGTAGGGCGCGATGTGCTGTCGCGGCTGATGTACGGCGCGCGC
TTGTCGCTGCTGGTTGGCTGTCTGGTAGTGGTGTTATCGCTGATTATGGGCGTTATTCTCGGCCTGATCG
CCGGTTACTTTGGCGGTCTGGTCGATAACATCATCATGCGCGTGGTCGATATCATGCTGGCGCTGCCAAG
TCTACTGCTGGCACTGGTGCTGGTGGCGATTTTCGGCCCGTCGATTGGTAACGCCGCGCTGGCGCTAACC
TTCGTTGCGCTGCCGCATTATGTGCGCTTAACCCGCGCCGCCGTGCTGGTGGAAGTTAACCGCGATTACG
TCACCGCGTCTCGCGTGGCGGGTGCCGGGGCAATGCGCCAGATGTTTATTAACATCTTCCCGAACTGCCT
TGCGCCGCTGATTGTTCAGGCGTCGCTCGGTTTCTCTAACGCCATTCTCGATATGGCTGCTCTTGGTTTC
CTCGGCATGGGCGCGCAGCCGCCAACGCCGGAGTGGGGCACCATGCTCTCTGATGTGTTGCAGTTCGCGC
AAAGCGCCTGGTGGGTCGTGACCTTCCCGGGTCTGGCGATCCTGCTGACGGTGCTGGCATTTAACCTGAT
GGGTGACGGTCTGCGTGACGCGCTCGATCCCAAACTGAAGCAGTAAGAGGTTCGAGATGGCGTTATTAAA
TGTAGATAAATTATCGGTGCATTTCGGCGACGAAAGCGCACCGTTCCGCGCCGTAGATCGCATCAGCTAC
AGCGTAAAACAGGGCGAAGTGGTCGGGATTGTGGGTGAGTCCGGCTCTGGTAAATCGGTCAGTTCGCTGG
CAATTATGGGGCTGATTGATTATCCGGGCCGCGTAATGGCGGAAAAGCTGGAGTTTAACGGTCAGGATTT
GCAGCGTATCTCAGAAAAAGAGCGCCGCAACCTGGTGGGTGCCGAAGTGGCAATGATCTTCCAGGACCCG
ATGACCAGCCTTAACCCGTGCTACACCGTGGGTTTCCAGATTATGGAAGCGATTAAGGTGCATCAGGGCG
GCAACAAAAGTACCCGCCGTCAGCGAGCGATTGACCTGCTGAATCTGGTCGGTATTCCCGATCCGGCATC
GCGTCTGGATGTTTACCCGCATCAGCTTTCCGGCGGCATGAGCCAGCGCGTGATGATCGCCATGGCGATT
GCCTGTCGGCCAAAACTGCTGATTGCCGATGAACCGACCACTGCGCTGGACGTGACCATTCAGGCGCAAA
TTATCGAACTGCTGCTGGAGCTACAGCAGAAAGAGAACATGGCGCTGGTGTTGATCACTCATGACCTGGC
GCTGGTGGCGGAAGCGGCACATAAAATTATCGTGATGTATGCAGGCCAGGTAGTAGAAACGGGCGATGCG
CACGCTATCTTCCATGCGCCGCGTCACCCGTATACTCAGGCATTGCTGCGTGCGCTGCCGGAATTTGCTC
AGGACAAAGAACGTCTGGCGTCGTTGCCAGGTGTCGTTCCCGGCAAGTACGACCGCCCGAACGGCTGCCT
GCTTAACCCGCGCTGCCCCTACGCCACTGATAAATGCCGTGCTGAAGAACCGGCGCTGAATATGCTCGCT
GACGGGCGTCAGTCCAAATGCCATTACCCACTTGATGATGCCGGGAGGCCGACACTATGAGTACGCATGA
GGCCACCTCGCAACAACCGCTGTTGCAGGCTATCGACCTGAAAAAACATTATCCGGTGAAGAAAGGCATG
TTCGCGCCGGAACGTCTGGTGAAGGCGCTGGATGGCGTTTCGTTTAACCTTGAACGTGGCAAAACGCTGG
CAGTAGTAGGTGAATCTGGCTGCGGTAAATCGACCCTCGGTCGGTTGCTGACGATGATTGAAACGCCCAC
CGGCGGCGAACTGTATTACCAGGGGCAGGATCTGCTTAAGCACGATCCGCAAGCGCAGAAGCTACGTCGG
CAGAAAATCCAGATTGTCTTCCAGAACCCTTACGGTTCGCTGAATCCGCGTAAAAAAGTTGGGCAGATTC
TCGAAGAGCCGCTGCTGATCAACACCAGCTTAAGCAAAGTACAGCGTCGGGAAAAAGCTCTGTCGATGAT
GGCGAAAGTCGGCCTGAAAACCGAGCATTATGACCGCTATCCGCATATGTTCTCCGGCGGTCAGCGTCAG
CGTATCGCCATTGCCCGAGGTCTGATGCTCGACCCGGATGTGGTGATTGCCGATGAGCCGGTTTCCGCGC
TGGACGTCTCAGTGCGTGCGCAGGTGCTGAATCTGATGATGGATTTGCAGCAGGAACTGGGGCTATCTTA
TGTCTTTATCTCCCACGATCTGTCGGTGGTGGAGCACATTGCTGATGAAGTGATGGTGATGTACCTGGGC
CGCTGCGTGGAGAAGGGGACGAAGGACCAAATCTTCAATAACCCGCGCCACCCGTACACTCAGGCGCTGC
TCTCCGCGACACCACGCCTGAACCCGGACGATCGTCGCGAACGCATCAAACTTACCGGTGAACTGCCAAG
CCCGCTGAATCCACCGCCAGGCTGCGCCTTCAACGCCCGCTGTCGTCGACGCTTCGGCCCCTGCACCCAG
TTGCAGCCGCAGCTAAAAGACTACGGCGGTCAACTGGTAGCTTGTTTTGCCGTTGATCAGGATGAAAATC
CGCAGAAGCCAGCTGTTTAACTCTCCCGATGAGATCAGCTTTCATGCTGATCTCATGTCAAATATGACCT
TTTTATGCTTTATCTATCATTTATGTATCTTTTTTGACCTTTTTCTTTGCCAATGAGTTATATATGAGCT
AAATTATAACCATTAATGAAAAATGGTTCATTTGTGATACTTAACGAATTTATCTGACCATAAATGATCT
TGTTTTTGTCTTTTATCAATCGAAAGGTTCTTTAATGATCTGCTCAGGACCACAAAATCTGGCTCAAGAG
TTGAAAGCGATCGGCGACCAACTCCAGGAGTTGCAGAAGAAACTTATTCAGGGGCCGAATATTAGTCAAC
CACGCCCCCTCCTGACCATTGAGACTCCCCGTCATTTGGGGGAACAACTGAACGCACGTCGCAAAGAATT
GGGCATTGATTTATACACACTTGAACTACAAACGGGGATCTCAACGTCCACGTTAAAGCGACTTTTTAAG
GATCCTGAACAGGTTAAATTCGGCAGTGTGTTCGCGGTGGCGAATGTTCTTGGAGTGAAACTATGCATCG
GCGAGTGAAAGTGTTGCTCTATGGTCAGGTAGTGGGTGAACTCTCTCAGAACGACAGTGGTTTTTTGTTC
CAGTACGCCCACGATTACCACGGACCGGCAATCTCAATCAGTCTGCCCGTCGCACAGCGTCAGTTTCCCA
GTGAGACGTTGCATCCTTATTTCGCCTCACTGGCGCCAGAAGGATGGCTGCGTCAACGCTACAGCCAGAT
ACAGCATCGTGACGAAAACGATCTGCTGGGAATGCTTATTGATAACGGCAAGAATCTGCTGGGGGCCATC
CAGATTTTACCTTGGGAGGAATAATGGCGAATTGTCGTATTCTGTTAACGCCGTTGAATGAACGTGACGA
ACAGCGCGGATATTCGACACAGGGGTTGAAGCGACTGAGCGGCACTGCAAAATTGAATCCTCGGCTGGGG
TTTACGCGAACTCAGTTTGTGCAGGAACTTCCGCGTCAACAAAAAGGGATGAGTATTTCCGGTTACCAGC
CCAAATTGCAATTAGTGCTGGATGAAGGAGAGTTCCGCGTCGTAGATCATCAGGGAAATTTTATCCTTAA
GCCCTCTCCAGCCGACTTTCCCGGTTTGGCCGAAAATGAACACGCAACAATGACATTGATGTCTCGTTTG
GGATTTGACGTACCTGTGCATGGCCTGTTGAGTTTTGCACCACAATCAGAGGAAGAGCTTGAATACGCAT
TTGTTATCCGGCGCTATGACCGGGATAACAAGGGGCTGCCAGTGCATCAGGAACAGCTTGATGGCGCGAT
GCAGATTACAGATAAATATGGCAAAACGGGGAATGATAACGAACAATATGTCAGCTATGAAACGCTGGCC
CGATTTTTAGTTGCCCATGTTAACGACAACATCGCATTTAAAATCGATCTCTTTCGTCGCATTGTTTACG
CCTGGTTGCTGGGTAATAACGACATGCATTTACGAAACTTTGGCTTAGTGTACTCCGATGGTTTGACGCC
TGCGTTAGCGCCGGTGTATGACTTTGTTTCTGTCGCTCCCTATCCGGAATATTTTTACTCAAACTATCTG
GCGCTGCCGTTATTGACGCGAGAAGAAGGCGGTCGGGAACTGGCTCCTGGATTTCACAGTGATTATGGCG
AGTATATCGGGCAGGACTTTTTGCTGTTGGGTGAATCAATGGGGTTAGCGCCCAGATTGCTGGAAAAACT
CTTTCAGGATATACGTAAAGAAAATGCCATTGTTATGGAAACGTATGAGCAGTCCTTTATGACTCAGGAT
CATATCCAGGCTGTGCTGCAATGCTATCGACATCGTCTGGGGCTGCTGTGAGCAGCCCCCGTTACTTTTA
TTCAATCAGCTTCAATAGCGGCGAAAAGCACAGCAAAATACCATAAAACAGGATAAGCCATGTTTTTAGC
CCGCGTAGTTTTTTCAGTTGTGAAACTTTAGAGATCAGGAAAAATGGAATGAGGCACGACACAATGCCAT
ATAACGGGCTTCCCAACTGAAAGAACACCAGCACCGATACACGAAACGAAACCCAAATCGTCAACGTAAT
GACGATAAAAGCGCAGATCGCCAGAGTCAGCATGCGTGAGTTAATTTTCCTGGTATCAATAATTCGGCTT
AACAGATTGAGAATAATGCCTTTAATGGCCTCGTGGAAACCGAGATAAATGCCAAAGAATGCAGTCAGTA
CGGCAAAGATATTCAGCACCGTAGAGGTGATATGAATGATATGCCCAGGGATCACCTGCGCGGCCAGTGC
CAGTGCCGAGATATTTTGTTCAAAGGCAGAAACGGCTTCTTCGTGGCTAATTGAGAAGGTAAACGAAAAG
GCAAAAAACAAGATCACCGCAATGAGCGTGATATAGCTAATCCGGTGGGTACGCAGCGCGAGCCGGGTTG
CCAGTACTTTATCCGCTTCCCGTTTACGATAGGCAATATTCATTGGGTTAAGTACCTGAATAAATACTGC
GGAAAAGAAGCAAAATGGAATAGTAAGCAGGACATCGCGGAAAAAGTCGGAGGCTTGCGGGAAGGCGGTT
ATATTGGCGAAATTCCAGTGCGGGATCATCGCAAAACCGAACACGACAATAATCCCCACTTTGACCACCA
CCATTGGCCCGGAAATCTTAAACAGTAATCGTTCACCACCAGACGCAATCGCCACCAGTACGGCGAAAAT
GGCGACTTTATAAAATAGAGATTGAGAAAGATCGGCATCGGTTAAACCGAAGGTTTTCAGGTACGAGGCG
CTGTCGAAAACCACGGAGAGAGAGTAGATAAAAATCCCGTGGATAATCATCAAAAAGTAGATAACCCCGA
GGAAAATTCCCCAGTTCTTCCCCAGGTAATGACTGATAATATCGGTGTAGTCATTACAGGAATCGCTTTC
AGAAAGGGTTTTTAAATAAATGTCCTGTACTACCCAGGTGGCAGGATAAGCAATGATCGCTGCGGTAATA
AATACCCAAATTCCCTTCAATCCAATTTGTACTGGCATCAGCACGGTTCCGGCACCAATCGCCATGCCTA
TGCATAATAAAACCCAGCCGAAGTCGTAGCGTGTAAACGGCAATTTCTGATCGTGTTTCGGTAGTGTGTT
GTGCTGCATAAAGTCCTGTCCAGAAAGAAGTCGGCCTCGCAAAAATGAATAAACCCAGTTTCTCTTGCGC
AACAGGTGGAGAAGTCGAATACGCAGTATGTAAAAAATGAGGCAACAGATTCACTGGGGAGGTCGCGAGG
AGGCGCAATTCTACAAAATTGCGCATTTCACTACTAGTCTGGAGTCAGCCCGGATATGAGCTGCAACTAT
TGCAAATAAAGAAATTAAGCTGGAAGGCATCACGCAATGAGGAAGATTGCCGGGTGCTGACGGCAAAAAG
CAATCGTAAAATCAGCGGCAAGCCGGAAGGGTTCCGGTGAGGCGCAATGTTGCGGGGGCTTTATCCCTGG
TGGCATTGGTTGCTGGAGAGAGAAAACCCCCGCACGTTGCAGGTATGCACCTGACAACATCACGGGGGCC
ATTCTTGCATCTAGACCATTCAAGAATAGCCGCGAAACGTTGTCATTACAACACAGGCGGCTATATGACG
CTCGCAGAGCTGGGCATGGCCTTCTGGCATGATTTAGCGGTTCCGGTCATTGCTGGCATTCTTGCCAGTA
TGATCGTGAACTGGCTGAACAAGCGGAAGTAACGTGTCATGCGGGCGCCAGGCTGCCGTAATGGCAATTT
GCGCCCGGACCAGGCCGCAGAGGTGAAACTCTGCGGCCTTTTTCGTAAGAAAAATGCAACGGTTGCAAGC
GGATAATATTCTGCGGAATGCGCAGCACAGAGTGAAGAAGTGATGGATTCCGGAGCAGAAAAACAGTCGT
AGAATCAGCGGCAAGCCGGAAAGGTTCCGGTGAGGCGCAATGTTGCGGGGGCTTAATCCCTGGTGGCATT
GGTTGCTGGAGAGAGAAAACCCCCGCACGTTGCAGGTATGCACCTGACAACATCACGGGGGCTAATCTTG
AACCTAGACCACTCAAGAATAGCCGCGAAACGTTGTCATTACAACACAGGCGGCTATATGACGCTCGCAG
AACTGGGCATGGCCTTCTGGCATGATTTAGCGGCTCCGGTCATTGCTGGCATTCTTGCCAGTATGATCGT
GAACTGGCTGAATAAGCGGAAGTAACGTGTCATGCGGGCGTCAGGCTGCCGTAATGGCAATTTGCGCCCG
GATCAGGCCGCAGGGGGAAACTCTGCGGCCTTTTTGTGCACAGAAAACCCCCAGCTAGGCTGGGGGGTCC
GGAAAGCTTTCAGCTTTGAGCCAGTTATTAAAACCCCTTTTGATTTGTTAAAACACCTTGCGGTCTGGCA
ACTGCAAGTGTCAAACAAGAAATCAAAAGGGGGTCCCAATGGGGAACGAAAAGAGCTTAGCGCACACCCG
ATGGAACTGTAAATATCACATAGTATTTGCGCCAAAATACCGAAGACAGGTGTTCTACAGAGAGAAGCGT
AGAGCAATAGGCTGTATTTTGAGAAAGCTGTGTGAGTGGAAAAGTGTACGGATTCTGGAAGCTGAATGCT
GTGCAGATCATATCCATATGCTTGTGGAGATCCCGCCCAAAATGAGCGTATCCGGCTTTATGGGATATCT
GAAAGGGAAAAGCAGTCTGATGCTTTACGAGCAGTTTGGTGATTTGAAATTCAAGTACAGGAACAGGGAG
TTCTGGTGCAGAGGGTATTACGTCGATACGGTGGGTAAGAACACGGCGAAGATACAGGATTACATAAAGC
ACCAGCTTGAAGAGGATAAAATGGGAGAGCAGTTATCGATTCCCTATCCGGGCAGCCCGTTTACGGGCCG
TAAGTAACGAAGTTGGATGCAAATGTCAGATCGTGTGCGCCTGTTAGGGCGCGGCAGGTAAGAGAGTCTT
ATAGGCGCATTTGAAAAACCTCCGGCTATGCCGGAGGATATTTATTCGTTCTTACTGCGGGTAAGGCACC
CAGTCGCCGCCGTTCAGGCGAACGTACGGTTTATCCTGGTATTGAATAACTACTGCATTTGAGTTCTCAG
AGACCGGTGCTGTTTGTGGTAACCCACTGGTGAGTTTTTTCCAGTCAACATTGTCTTCGGTGAAAATCTT
GCCATCAAGAACGCGAACCACCAGATCGGAGATAGCCAGGAAGCTGCTCGGTTGGTCGATGACAATCGGA
GCCCCCTGATGTGGTGCCTTCATGCCGAAGAATTTCACCCCAACGGGGACGTCTGTGATAGACGGGCTAG
GGATATCACGTAGACCAGATACCTGCATTCTGTCGCCCTTCAGCGCGCCGCCGTGTTCCGGCACCACGAC
CACCATCACTTTACGACCCGATTTCTCCAGTTCAGTAAAGAAGGCGTCCAGTTCATCAAAGAATTTTTGC
GCCCGCGCTTTGTAATCCGCTGTTTTGCTGACGCCCGGATAATGGTTGCCGTCATGCAGTGGAAGCGTGT
TGTAGAACGTGGCACTACGGCTGTTTTTATCTTTTTCGGTAACGTCCAGCCAACGGTTAAGCACGGCGGT
ATCGTCATAAACCGGCGAACCATCAAAGCCCAGCAAAATAACCGGCAGATTTGTTTGATCCATCAATTCG
CTCTGCATGCCGCCATTTTCGCGAACTTCCTTCAAAAAACCACCGAACTGGCCGTTATGTCCCATCATCA
GGTGCTGGGTAAAGCCCAGTTTCGACAGGTTATCAAACAGATAGCAGTCGTTATTTGCCGGTTGATACAG
ATTAGTGTGCGAAGTCTGCCCGCAGCTGGCGCGCAGTAAACGGATCGCCGCCGGGCCACTGTAGGAGGTG
GCGGAGTTAAAGTTCTTGAACTCAATATCGAAATGCGACCACAGTGGATGCGACATCAATCCGGCGGCTT
TAATATCCGACCAGGAAAGCGAACAGATATTAATCACCAGTAGTTCAAATGGCTGAGCATCAGCGGGCAG
CGAAGACGGGAAGATCGATTTACGTTTCGCCTCCGCGTTATAGAAATTATTCAGCCAGGCGTTAAGGTTT
GCTGTTGTTGGCGGTGCAGTTTGTGCGGGTATATCACCCACTACCGGTGCGCCACCCGTCGCCGCAACGG
TTGCCGCTGCGTTACCACCCGTCGTTGTTACAGTGGTCGTTGGTTGACCGGCTGGCCACAAGGAGAAACT
TGGTCCCGCCAGGGTAAGTACGTTCAGCCATAGCAGAATGGCAACCACAAAAACGGTAATGCGAATCCAT
TGTGACAGGAATAACCAGGCCACGAATAAAACAAAAATGGCCCCAATCATCTGCCAGTTAATAAAGCGTG
TGACAAGATCGATTAAATAATCGGTACTGAACCCCGCCACCTGCGAACCCTGGCTCATTATGCTTTCCGG
GCCAGGCAACCAGGTGTCATGCCAGAACAAAGCAAAGCCGATCGGCAGGGCAATCCAGTGGCGCAAGCGA
TGCAGGCTATAGTGCGGAATGGGCATCAGTAGAAACGCGGCAAACACCAAATTGAGGAGCGGATGGAAGT
TAAGATATCCCGCCCACAACAGGCCGAACTTAACCAGAAAATAGAAGTTCCAGCCGGAAAGGCCGCGCCA
GTATTGCCAGAGGGAAGAAGGCATGGCGGTATTTTGCGTAAATTGAGTCATTTTTGGGTTGCCCTGGCTT
TTTCCGTGCGGCGTAACGTCCCGGCCGGTTTAACATAACGAGGTTTAGCAAAGAACAAACGTAAGGTGTC
GCGAATGCGTCGCAAAGAGTGCCGCGCCAGATAGCCCAGCGGGAAAAATATCAGTGCGCAAACGACAATA
ATTTCAATGATATCGCTGATGGTCATCATGATGAGCGCTCCACAGCATCATCTAACAGTCGCATTGGTTC
TGGTATTCGTCGCCAGTGGCGACCATCGTGCTCGGCATTGATGACCGGTTTAGAACTTTGCGCTAAAGGC
AGCGGCATGCCCCATTGTTCTGGGGCAAGCAGGCGCATCTGCACCAGCTCGGCACTGATTTGATCATCTT
CAAACCAGACCATTCGGTTTGAGAAAATGTCGCCAGTAGGCAATGGGAAAATATGATTCAACGCGGTATC
CAGATCGTTAATCCGACAGAATGAGAGAAACAGCACCAGCCGATTACCGCCAATGGTCATGATATCGCCG
GTACGGTTAGGGCGACATAGCGTCAGGGCTTGCTCAACGCGGATACCCGGTACCGGACGTAGGGCAACCA
GAACGCCTTTACCGTGGGCAGGTAATAGAGGGTTATTCATCATGTTGTTGACGGCATTACAGAACACATC
CCACTTCTGGAAACCACGCAGTTTGAGCGGCTGGGTCATTGACAGCAAGGTAGTTATATCTTCCGGCACA
TAGCGACTAAACTTCTGCCCTTGCACGCTTTCGATCATCGTCAGACAGCGGGAGAGTGGCGCATTCCACG
GGATAACCATATTTGCACCGCAGGCCAATAATAAACGTTCATCGGTGGCGCGCAGGCTGGCGGTATTTTC
CCGTACGAGGATTTTCATCGCACTACCGCGCTGGCGACGCAGAGTATGAATGCTGCGGGCCAGTGGCTCG
ATTTGCGCATTTTGCTGTAAAGAAAAGACCACCGTCGCCGCCTGAGCGGTACGGGCTTCATTGAACAGGA
CTTCGTTATTGTTGAACAGTTGCCAGTGTTCCGATAGCGGCGGCGCACCTTCCAGTACAGCAACATTACT
CAGAATGCGTTTTTCGTCGCTGCGTGGTTGGATTTCCGCCTCTTGGTGTTGAACTAATGTCCAGCAACCA
TTTTGTTGCTGAACGCTAAGCTGCTGACGGGCGCTGACCCCTTTTTCGTTGCACCAGAAAGCAATATCCA
GCAAATGTTGGCCGCCCTGAAAACGCAAACTGGCAAGACCAAAAAGTGAACGGTATTCCTCAAGTAACAA
TGAAAATTGTTTATCGTTATTATTTCCGGAATTAATTACCAAAAGCGAACAATGGTTTAGCCTGCTCCAT
TTATTCATTTTATCCAACCATGAGCGAAGCCGCTCGGCAGGAATGTTTTGCCATGCGTTATTTGCGCAAA
CAAGAATAAAAAGGTAATTATGGGGATCAATAGAACACTGCAAATCACGGGCCAAATAGTATAGACCTTT
TTCATGATTTAGCATTGAAAATAATGTTATTTTTCCCGGCCCTTGAGAATCATCTAATTGAAAGATTTTC
GCTGGATCGCTGTCCATGCTAATGACCGCGACGTGTGCGGTTTCAGCCTGGGATGCAATTGTTTGATTCG
CCAGACTGATAGCATCTTCATGGCGATCGACGTTAAACCACCAGACGCCGCCTGCTGGCATATGTCGCAG
CTCATCCCATAATGATGAGATACCGATAGAGAATACAGGGTCCACAATGTCCCTCATGTCAACATTTTGT
CTGATTATCAGTTTACTAGCGAAAGCTAAGAAATAAACCTACCATTGAAATTAAAACTTATCAGATTTAG
CATGTGAATCAATTTAGCAGGTCACAAGACATGTGATTTTAGTCTTTTCGTTTTTAACTTTTTCTGTTGC
GTAACGGAAAGTCAAAAAGTGAGCACATTCCCGTCTCGCCGTAAACAATAAACCGACGAAATGCTCACAG
TTAGAATTGTCTCATGAACGGTACGGTTATTTCATAGGGATCAAGAAAAATGAATAACAATGAACCAGAT
ACTCTGCCTGATCCCGCGATAGGCTATATCTTCCAGAATGATATTTTGGCGTTAAAGCAGGCATTTTCAC
TGCCTGATATTGATTATGCCGATATTTCCCAACGCGAACAGTTGGCCGCGGCATTAAAACGCTGGCCGTT
GCTGGCAGAGTTTGCGCAACAAAAGTAGGGGATTGGTGAATGGCCGTACTGGGATTGCAGGGGGTTCGGG
GAGGCGTGGGGACAACAACCATCACCGCCGCATTAGCCTGGTCATTACAAATGTTGGGAGAAAATGTCCT
GGTGGTCGATGCCTGCCCGGACAACTTGTTGCGCCTGTCATTTAACGTTGATTTTACCCACCGTCAGGGT
TGGGCCAGAGCTATGCTGGATGGCCAGGACTGGCGTGACGCCGGGTTGCGCTATACCTCGCAGCTCGATT
TGCTGCCTTTTGGTCAGTTATCCATTGAAGAACAAGAAAATCCACAGCACTGGCAAACCCGGCTGAGCGA
TATTTGCACCGGCTTACAGCAACTAAAAGCCAGCGGGCGTTACCAGTGGATTTTAATTGACTTACCGCGT
GATGCCTCGCAGATAACCCACCAGCTGCTGAGTTTGTGCGATCACTCGCTGGCAATCGTCAATGTGGATG
CCAACTGCCATATCCGACTGCATCAGCAAGCGCTGCCGGATGGTGCACATATTTTGATTAATGACTTCCG
TATTGGCAGCCAGGTTCAGGACGATATTTACCAGCTTTGGTTGCAAAGCCAGCGCCGATTGCTGCCGATG
CTCATTCATCGTGATGAAGCGATGGCTGAATGTCTGGCAGCTAAGCAACCAGTCGGTGAATTTCGCAGTG
ATGCGCTGGCGGCTGAAGAAATACTGACGCTGGCTAACTGGTGCCTGTTAAACTATTCCGGGCTGAAAAC
GCCAGTCGGGAGTGCATCATGAGTATCCTGACCCGGTGGTTGCTTATCCCGCCGGTCAACGCACGGCTTA
TTGGGCGTTATCGCGATTATCGTCGTCACGGCGCGTCGGCTTTCAGCGCGACGCTCGGCTGTTTCTGGAT
GATCCTGGCCTGGATTTTTATTCCGCTGGAGCACCCGCACTGGCAGCGTATTCGCGCAGAACATAAAAAC
CTGTATCCGCATATCAACGCCTCGCGTCCGCGTCCGCTGGACCCGGTCCGTTATCTTATTCAAACATGCT
GGTTACTGATCGGTGCATCGCGCAAAGAAACGCCGAAACCGCGCAGGCGAGCATTTTCAGGTCTACAAAA
TATTCGTGGACGTTACCATCAATGGATGAACGAGCTGCCTGAGCGCGTTAGCCATAAAACACAGCATCTT
GATGAGAAAAAAGAGCTCGGTCATTTGAGTGCCGGGGCGCGGCGGTTGATCCTTGGTATCATCGTCACCT
TCTCGCTGATTCTGGCGTTAATCTGCGTTACTCAGCCGTTTAACCCGCTAGCGCAGTTTATCTTCCTGAT
GCTGCTGTGGGGGGTAGCGCTGATCGTACGGCGGATGCCGGGGCGCTTCTCGGCGCTGATGCTGATTGTG
CTGTCGCTGACCGTTTCTTGCCGTTATATCTGGTGGCGTTACACCTCGACGTTAAACTGGGACGATCCGG
TCAGCCTGGTGTGCGGGCTTATTCTGCTGTTCGCCGAAACGTACGCGTGGATTGTGCTGGTGCTCGGCTA
TTTCCAGGTCGTATGGCCTCTGAATCGTCAGCCGGTGCCATTGCCGAAAGATATGTCGCTGTGGCCGTCG
GTGGATATCTTTGTCCCGACTTACAACGAAGATCTCAACGTGGTGAAAAATACCATTTACGCTTCGCTGG
GTATCGACTGGCCGAAAGACAAGCTGAACATCTGGATCCTCGATGACGGCGGCAGGGAAGAGTTTCGCCA
GTTTGCGCAAAACGTGGGGGTGAAATATATCGCCCGTACCACTCATGAACATGCGAAAGCGGGCAACATC
AACAATGCGCTGAAATATGCCAAAGGCGAGTTCGTGTCGATATTCGACTGCGACCACGTACCAACGCGAT
CGTTACTGCAAATGACCATGGGCTGGTTCCTGAAAGAGAAACAGCTGGCGATGATGCAGACGCCGCACCA
CTTCTTCTCGCCGGATCCGTTTGAACGCAACCTGGGGCGTTTTCGTAAAACGCCGAACGAAGGCACGCTG
TTCTATGGTCTGGTGCAGGACGGCAATGATATGTGGGATGCCACTTTCTTCTGCGGCTCATGTGCGGTGA
TTCGCCGTAAGCCGCTGGATGAGATTGGCGGTATTGCTGTCGAAACGGTAACCGAAGATGCGCACACTTC
TCTGCGTCTGCACCGTCGTGGCTACACCTCCGCGTATATGCGTATTCCGCAGGCAGCGGGGCTGGCGACC
GAAAGTCTCTCGGCGCATATCGGTCAGCGTATTCGCTGGGCGCGCGGGATGGTGCAAATCTTCCGTCTCG
ATAACCCGCTCACCGGTAAAGGGCTGAAGTTTGCTCAGCGGCTGTGCTATGTCAACGCCATGTTCCACTT
CTTGTCGGGCATTCCACGACTGATCTTCCTGACTGCGCCGCTGGCGTTCCTGCTGTTTCATGCCTACATC
ATCTACGCGCCAGCGTTGATGATCGCCCTGTTCGTGCTACCGCATATGATCCATGCCAGCCTGACTAACT
CGAAGATCCAGGGCAAATATCGCCACTCTTTCTGGAGTGAAATCTACGAAACGGTGCTGGCGTGGTATAT
CGCACCACCGACGCTGGTGGCGCTGATTAACCCGCACAAAGGCAAATTTAACGTCACCGCCAAAGGTGGA
CTGGTGGAAGAAGAGTACGTCGACTGGGTGATCTCGCGGCCCTACATCTTCCTTGTTCTGCTCAACCTGG
TGGGCGTAGCGGTTGGGATCTGGCGCTACTTCTATGGTCCGCCAACCGAGATGCTCACCGTGGTCGTCAG
TATGGTGTGGGTATTCTACAACCTGATTATTCTCGGCGGCGCAGTCGCAGTATCGGTAGAAAGCAAACAG
GTACGCCGATCGCACCGCGTGGAGATGACGATGCCCGCAGCAATTGCCCGCGAAGATGGTCACCTCTTCT
CGTGTACCGTTCAGGATTTCTCCGACGGTGGTTTGGGGATCAAGATCAACGGTCAGGCGCAGATTCTGGA
AGGGCAGAAAGTGAATCTGTTGCTTAAACGCGGTCAGCAGGAATACGTCTTCCCGGCTCAGGTGGCCCGC
GTGATGGGTAATGAAGTTGGGCTGAAATTAATGCCGCTCACTACCCAGCAACATATCGATTTTGTGCAGT
GTACGTTTGCCCGTGCGGATACATGGGCGCTCTGGCAGGACAGCTACCCGGAAGATAAGCCGCTGGAAAG
TCTGCTGGATATTCTGAAGCTCGGCTTCCGTGGCTACCGCCATCTGGCGGAATTTGCGCCTTCTTCGGTG
AAGGGCATATTCCGTGTGCTGACTTCTCTGGTTTCCTGGGTTGTATCGTTTATTCCGCGCCGCCCGGAGC
GGAGCGAAACGGCACAACCATCGGATCAGGCTTTGGCTCAACAATGATGATAACGCGATGAAAAGAAAAA
TATTCTGGATTTGTGCAGTGGCTCTGGGGATGAGTGCGTTCCCCTCTTTCATGACGCAGGCGACGCCAGC
AACGCAACCACTGATCAATGCTGAGCCAGCTGTAACCGCCCAGGCGGAGCAAAATCCGCAGGTGGGGCAA
GTGATGCCGGGCGTGCAGGGCGCAGATGCGCCAGTCGTGGCGCAGAACGGTCCTTCCCGTGATGTGAAGC
TGACCTTTGCGCAAATTGCGCCGCCGCCGGGCAGCATGGTGCTACGTGGCATTAACCCGAACGGCAGCAT
TGAGTTTGGTATGCGCAGCGATGAAGTGGTGACGAAGGCGATGCTCAACCTCGAATACACGCCATCGCCA
TCATTACTGCCTGTCCAGTCGCAGTTAAAGGTTTATCTCAATGATGAACTGATGGGCGTGCTGCCAGTGA
CCAAAGAACAGTTGGGTAAAAAAACGCTGGCACAAATGCCCATTAACCCGCTGTTTATTACTGATTTCAA
CCGTGTGCGGCTGGAGTTTGTCGGCCATTATCAGGACGTGTGCGAAAACCCGGCCAGCACCACGCTTTGG
CTGGATGTTGGGCGGAGCAGTGGACTGGATCTGACCTATCAGACCCTGAATGTGAAGAATGACCTGTCAC
ACTTCCCGGTGCCATTCTTTGACCCGCGTGATAACCGCACCAACACCTTGCCGATGGTCTTTGCGGGTGC
GCCAGATGTTGAGCTGCAACAAGCATCTGCCATTGTCGCCTCGTGGTTTGGTTCGCGTTCTGGCTGGCGT
GGGCAGAACTTCCCGGTGCTCTATAACCAACTGCCGGATCGCAATGCTATTGTCTTTGCCACCAATGACA
AACGCCCGGACTTCCTGCGCGATCATCCGGCGGTAAAAGCCCCGGTGATTGAGATGATTAACCATCCGCA
GAATCCTTACGTCAAACTGCTGGTGGTGTTTGGTCGTGACGACAAAGACCTGTTGCAGGCAGCGAAAGGT
ATCGCTCAGGGTAACATTCTGTTCCGTGGTGAAAGTGTGGTAGTGAATGAAGTGAAACCGCTGCTACCGC
GTAAGCCGTACGATGCGCCGAACTGGGTGCGTACCGATCGTCCGGTTACCTTTGGTGAACTGAAAACCTA
TGAAGAACAATTACAATCCAGCGGTCTTGAGCCAGCAGCGATTAACGTTTCGCTAAATTTGCCGCCGGAT
CTCTACCTGATGCGCAGTACCGGCATTGATATGGATATCAACTATCGCTACACCATGCCGCCGGTGAAAG
ACAGTTCGCGGATGGATATCAGCCTGAATAACCAGTTCCTGCAATCCTTCAACCTGAGCAGCAAACAGGA
GGCGAACCGCCTGCTGCTGCGGATTCCGGTATTACAAGGTTTGCTGGATGGCAAAACGGATGTCTCTATT
CCGGCGCTGAAACTGGGCGCGACCAACCAGCTGCGGTTCGACTTTGAGTATATGAACCCGATGCCGGGCG
GTTCGGTGGATAACTGCATTACCTTCCAGCCGGTGCAGAATCATGTGGTGATTGGTGACGACTCCACCAT
CGACTTCTCGAAGTATTACCACTTCATCCCGATGCCGGATCTACGCGCCTTTGCTAACGCGGGCTTCCCG
TTCAGCCGGATGGCGGATTTGTCGCAAACCATCACCGTGATGCCGAAAACGCCAAACGAAGCACAGATGG
AAACCTTGCTGAATACTGTTGGCTTTATCGGTGCGCAGACGGGCTTCCCGGCGATTAACCTGACGGTGAC
CGATGATGGCAGCACCATTCAGGGCAAAGATGCCGACATCATGATCGTCGGTGGTATCCCGGACAAACTG
AAAGACGATAAGCAGATCGACCTGTTGGTGCAGGCGACCGAAAGCTGGGTGAAAACGCCGATGCGCCAGA
CCCCGTTCCCCGGCATTGTGCCGGACGAGAGCGATCGCGCGGCAGAAACCCAGTCAACGCTGACCTCTTC
CGGTGCGATGGCGGCGGTGATTGGCTTCCAGTCGCCGTATAACGACCAGCGCAGCGTGATTGCGCTGCTG
GCAGATAGCCCACGCGGTTATGAAATGCTTAACGATGCGGTGAACGATAGCGGCAAACGCGCCACCATGT
TCGGTTCGGTCGCGGTGATCCGCGAGTCCGGTATCAACAGCCTACGTGTTGGCGATGTTTATTACGTAGG
TCATCTGCCGTGGTTCGAGCGCTTGTGGTATGCGCTGGCAAACCATCCGATTCTGCTGGCGGTGCTGGCG
GCTATCAGTGTGATATTGCTGGCATGGGTACTGTGGCGTCTGCTGCGTATTATTAGTCGTCGTCGTCTTA
ACCCGGATAACGAGTAATTGAAGATGAATGTGTTGCGTAGTGGACTCGTGACGATGCTGCTGCTGGCTGC
CTTTAGTGTTCAGGCAGCCTGTACCTGGCCTGCCTGGGAGCAGTTTAAAAAGGACTACATCAGTCAGGAA
GGGCGCGTCATCGACCCCAGTGACGCGCGCAAAATCACCACCTCCGAAGGGCAAAGTTACGGCATGTTCT
TTGCCCTGGCGGCTAACGACCGTGCAGCTTTCGATAATCTTCTCGACTGGACGCAGAACAATCTCGCACA
GGGTTCTTTAAAAGAACATTTGCCCGCCTGGCTGTGGGGCAAGAAAGAGAACAGTAAGTGGGAAGTGCTG
GACAGCAATTCGGCCTCCGATGGTGATGTCTGGATGGCCTGGTCGTTGCTGGAGGCGGGGCGTTTGTGGA
AAGAGCAGCGTTATACCGACATCGGCAGCGCATTGCTAAAACGTATCGTGCGGGAGGAAGTGGTGACGGT
GCCTGGGCTGGGCTCCATGTTGTTACCGGGCAAAGTGGGTTTTGCTGAGGATAACAGCTGGCGTTTTAAC
CCCAGCTACCTGCCGCCGACGCTGGCGCAGTATTTCACCCGCTTTGGCGCGCCGTGGACCACGCTGCGCG
AAACCAATCAACGTTTATTGCTGGAAACCGCCCCGAAAGGCTTTTCGCCAGACTGGGTGCGCTATGAGAA
AGACAAAGGCTGGCAGCTAAAAGCCGAAAAAACATTGATCAGCAGCTACGACGCTATCCGCGTTTACATG
TGGGTAGGCATGATGCCTGACAGCGATCCGCAAAAAGCGCGGATGCTCAACCGGTTTAAACCGATGGCGA
CATTCACTGAGAAAAACGGTTATCCGCCGGAAAAAGTGGATGTGGCTACGGGGAAAGCGCAGGGTAAAGG
ACCGGTCGGTTTTTCTGCCGCCATGCTGCCCTTTTTACAAAACCGCGATGCGCAGGCCGTTCAGCGCCAG
CGCGTGGCCGATAACTTTCCCGGCAGCGATGCCTATTACAACTATGTGCTGACCCTGTTTGGACAAGGCT
GGGATCAACACCGTTTCCGCTTCTCGACAAAAGGTGAGTTATTACCTGACTGGGGCCAGGAATGCGCAAA
TTCACACTAAACATATTCACGCTTTCCCTCGGTCTGGCCGTCATGCCGATGGTCGAGGCAGCACCAACCG
CTCAGCAACAGTTGCTGGAGCAAGTTCGGTTAGGCGAAGCGACCCATCGTGAAGACCTGGTGCAACAGTC
GTTGTATCGGCTGGAACTTATTGATCCGAATAACCCGGATGTGATTGCTGCCCGTTTTCGTTCTCTGTTA
CGTCAGGGCGATATTGATGGCGCACAAAAACAGCTCGATCGGCTGTCGCAGTTAGCGCCGAGTTCAAATG
CGTATAAATCGTCGCGGACTACGATGCTGCTTTCCGCGCCAGATGGTCGTCAGGCACTGCAACAGGCAAG
ATTGCAGGCGACGACTGGTCATGCGGAAGAGGCTGTGGCGAGTTACAACAAACTGTTCAACGGTGCGCCG
CCGGAAGGTGACATTGCTGTCGAGTACTGGAGTACGGTGGCGAAAATTCCGGCCCGCCGTGGCGAAGCGA
TTAATCAGCTAAAACGCATTAATGCGGATACGCCGGGCAACACGGGCCTGCAAAACAATCTGGCGCTATT
ACTGTTTAGTAGCGATCGCCGTGATGAAGGTTTTGCCGTCCTGGAACAGATGGCGAAATCGAACGCCGGG
CGCGAAGGGGCCTCTAAAATCTGGTACGGGCAGATTAAAGACATGCCCGTCAGCGATGCCAGCGTTCAGG
CACTGAAAAAATATCTCTCGATCTTTAGCGATGGCGATAGCGTGGCTGCTGCACAATCGCAACTGGCAGA
ACAGCAAAAACAGCTGGCCGACCCTGCTTTCCGCGCTCGTGCGCAAGGTTTAGCGGCGGTGGACTCTGGC
ATGGCGGGTAAAGCCATTCCCGAACTACAACAGGCGGTGCGGGCGAACCCGAAAGACAGTGAGGCTCTGG
GGGCGCTGGGCCAGGCGTATTCCCAGAAAGGCGATCGCGCCAATGCAGTGGTGAATCTGGAAAAAGCCCT
CGCGCTGGATCCGCACAACAGCAATAACGACAAATGGAACAGCCTGCTGAAAGTAAACCGCTACTGGCTG
GCGATCCAGCAGGGCGATGCCGCGCTGAAAGCCAATAATCCTGACCGGGCAGAACGGCTGTTCCAGCAGG
CACGTAATGTCGATAACACCGACAGCTATGCAGTGCTTGGGCTGGGCGATGTGGCGATGGCGCGCAAAGA
TTATCCCGCCGCCGAACGCTATTACCAGCAGACCTTGCGTATGGACAGCGGCAACACTAACGCCGTGCGC
GGGCTGGCGAATATTTACCGCCAGCAGTCGCCAGAAAAAGCCGAAGCGTATATCGCCTCGCTCTCTGCCA
GCCAGCGGCGCAGCATTGATGATATCGAACGCAGCCTGCAAAACGACCGTCTGGCACAGCAGGCAGAGGC
ACTGGAAAACCAGGGGAAATGGGCGCAGGCGGCAGCACTTCAGCGGCAACGACTGGCGCTGGACCCCGGC
AGTGTATGGATTACTTACCGACTTTCGCAGGATCTCTGGCAAGCCGGACAACGCAGCCAGGCCGATACGT
TAATGCGCAATCTGGCGCAGCAGAAGCCCAACGACCCGGAGCAGGTTTACGCTTACGGGCTGTACCTCTC
CGGTCACGACCAGGACAGAGCGGCGCTGGCGCATATCAACAGCCTGCCGCGCGCGCAGTGGAACAGCAAT
ATTCAGGAGCTGGTTAATCGACTGCAAAACGATCAGGTGCTGGAAACCGCTAATCGCCTGCGAGAAAACG
GTAAAGAGGCAGAAGCGGAAGCGATGCTGCGCCAGCAACCGCCTTCCTCGCGTATTGACCTCACGCTGGC
TGACTGGGCGCAGCAGCGACGTGATTACACCGCCGCCCGCGCTGCATATCAGAATGTTCTGGCGCGGGAG
CCAACTAACGCCGATGCCATTCTTGGTCTGACGGAAGTGGATATTGCTGCCGGTGACAAAGCGGCGGCAC
GTAGCCAGCTGGCGAAACTGCCTGCCACTGATAACGCCTCGCTGAACACACAGCGGCGCGTGGCGCTGGC
ACAGGCGCAGCTTGGCGATACCGCAGCGGCGCAGCAGACATTTAATAAGTTGATCCCGCAGGCAAAATCT
CAGCCACCGTCGATGGAAAGCGCGATGGTACTGCGTGATGGTGCGAAGTTTGAAGCGCAGGCGGGCGATC
CAACGCAGGCGCTGGAAACCTACAAAGACGCTATGGTTGCATCCGGTGTGACCACGACGCGTCCGCAGGA
TAACGACACCTTTACCCGGCTGACCCGTAACGACGAGAAAGATGACTGGCTGAAACGCGGCGTGCGCAGC
GATGCGGCGGACCTCTATCGCCAGCAGGATCTTAACGTCACTCTCGAGCACGATTACTGGGGTTCGAGCG
GCACCGGTGGTTACTCCGATCTGAAAGCGCACACCACTATGTTGCAGGTGGACGCGCCGTATTCTGACGG
GCGGATGTTCTTTCGCAGTGATTTCGTCAATATGAACGTCGGCAGTTTCTCCACTAATGCCGATGGCAAA
TGGGATGACAACTGGGGCACCTGTACATTACAGGACTGTAGCGGCAACCGCAGCCAGTCGGATTCCGGTG
CCAGCGTGGCGGTCGGCTGGCGAAATGACGTCTGGAGCTGGGATATCGGTACCACGCCGATGGGCTTCAA
CGTGGTGGATGTGGTCGGCGGCATCAGTTACAACGATGATATCGGGCCGCTGGGTTACACCGTTAACGCC
CACCGTCGGCCCATCTCCAGTTCTTTGCTGGCCTTTGGTGGGCAAAAAGACTCTCCGAGCAATACCGGGA
AAAAATGGGGCGGCGTGCGTGCCGACGGCGTGGGGCTAAGTCTGAGCTACGATAAAGGTGAAGCAAACGG
CGTCTGGGCATCGCTTAGCGGTGATCAGTTAACCGGTAAAAATGTCGAAGATAACTGGCGCGTGCGCTGG
ATGACGGGCTATTACTATAAGGTCATCAACCAGAACAATCGACGCGTCACAATCGGCCTGAACAACATGA
TCTGGCATTATGACAAAGACCTGAGTGGCTACTCACTCGGACAGGGCGGTTACTACAGTCCGCAGGAATA
CCTGTCGTTTGCCATACCGGTGATGTGGCGGGAGCGCACGGAAAACTGGTCGTGGGAGCTGGGGGCGTCT
GGCTCGTGGTCGCATTCACGCACCAAAACCATGCCGCGTTATCCGCTGATGAATCTGATCCCGACCGACT
GGCAGGAAGAAGCTGCGCGGCAATCCAACGATGGCGGCAGCAGTCAGGGCTTTGGCTACACGGCGCGGGC
ATTACTTGAACGACGTGTTACTTCCAACTGGTTTGTCGGCACGGCAATTGATATCCAGCAGGCAAAAGAT
TACGCACCCAGCCATTTTCTGCTCTACGTACGTTATTCCGCCGCCGGATGGCAGGGTGACATGGATTTAC
CGCCGCAGCCGCTGATACCTTACGCCGACTGGTAAGTTTTCAGATAGCGCTTCTCTTAATGCCGCTGCGA
TCGGGTATACTCGGGCGGCAATCTGGGATTTCCGGGGGGAGACAATTTGCGCGTAAGTCGCTCGTTAACA
ATCAAGCAGATGGCAATGGTGGCAGCCGTTGTCCTGGTGTTCGTTTTTATTTTTTGCACCGTTTTGCTGT
TCCATCTGGTCCAGCAGAATCGCTATAACACGGCTACGCAACTGGAAAGCATTGCTCGCTCTGTCCGCGA
ACCCTTATCTTCTGCCATTTTGAAAGGCGATATTCCCGAAGCGGAAGCTATTCTTGCCAGCATTAAACCG
GCAGGCGTGGTCAGCCGTGCCGATGTAGTGCTGCCTAACCAGTTCCAGGCGCTGCGTAAAAGTTTTATTC
CAGAGCGTCCGGTGCCGGTAATGGTTACTCGCCTGTTTGAGCTACCGGTGCAAATCTCGCTGGGCGTTTA
CTCGCTGGAACGTCCGGCAAACCCGCAGCCAATTGCCTATCTGGTGTTACAGGCGGATTCCTTCCGCATG
TATAAGTTCGTGATGAGCACCCTCTCAACGTTAGTGACCATTTACTTACTTTTGTCGTTAATATTGACGG
TGGCGATTAGCTGGTGCATTAACCGCCTGATTTTGCATCCGTTGCGCAATATTGCTCGCGAACTTAACGC
CATCCCACCCCAGGAGCTTGTTGGTCACCAACTGGCATTACCGCGTCTGCATCAGGACGATGAAATCGGT
ATGTTGGTTCGCAGTTACAACCTCAACCAGCAATTGCTGCAGCGCCATTATGAAGAACAGAACGAAAATG
CGATGCGCTTCCCGGTGTCGGATTTGCCGAACAAAGCCTTGCTGATGGAGATGCTGGAGCAGGTGGTGGC
GCGTAAACAAACCACCGCGCTGATGATCATCACCTGTGAAACCCTGCGTGATACTGCGGGTGTGCTGAAA
GAGGCGCAACGAGAAATTCTGCTGCTGACGCTGGTGGAAAAACTCAAATCGGTACTGTCGCCACGCATGA
TCCTCGCGCAGATTAGCGGTTATGACTTTGCTGTCATTGCCAACGGTGTACAGGAACCGTGGCACGCTAT
TACATTAGGTCAGCAAGTGCTCACTATCATGAGCGAGCGCCTGCCGATTGAACGTATTCAACTCCGTCCG
CACTGTAGCATTGGCGTGGCGATGTTCTACGGCGATCTCACCGCCGAACAGCTTTACAGTCGCGCTATTT
CTGCGGCATTTACCGCTCGCCATAAAGGCAAAAATCAGATTCAGTTCTTTGATCCGCAGCAGATGGAAGC
CGCCCAGAAGCGGTTGACGGAAGAGAGCGATATCCTTAATGCACTGGAAAATCATCAGTTTGCGATTTGG
TTACAGCCACAGGTCGAGATGACCAGCGGTAAACTGGTCAGTGCGGAAGTGTTACTGCGTATCCAGCAAC
CGGATGGCAGTTGGGACCTGCCCGATGGCTTAATCGATCGCATTGAGTGCTGTGGGCTGATGGTTACCGT
CGGTCACTGGGTGCTGGAAGAGTCCTGTCGATTGCTTGCTGCCTGGCAAGAGCGCGGCATTATGCTGCCC
TTGTCGGTAAACCTCTCAGCGCTGCAACTGATGCATCCAAATATGGTGGCGGATATGCTGGAACTGTTAA
CCCGCTATCGCATTCAGCCGGGAACACTGATTCTGGAAGTTACAGAAAGCCGACGTATTGACGATCCTCA
TGCTGCGGTGGCAATCCTCCGTCCGCTGCGCAATGCCGGAGTTCGGGTGGCGCTGGATGATTTCGGCATG
GGCTACGCAGGGCTGCGTCAGCTGCAGCATATGAAATCGTTGCCAATCGACGTACTGAAAATCGACAAAA
TGTTTGTTGAAGGTTTGCCGGAAGATAGCAGCATGATTGCTGCAATTATCATGCTGGCGCAGAGCCTGAA
CTTACAAATGATTGCCGAAGGCGTGGAGACTGAAGCACAACGCGACTGGCTGGCAAAAGCGGGCGTTGGT
ATTGCCCAGGGCTTCCTTTTTGCTCGCCCACTCCCTATTGAAATCTTCGAAGAGAGTTACCTGGAAGAAA
AGTAGCTACCCCAAACTGATTACAAAACTTTAAAAAGTGCTGGTTTGTGCGAGCCAGCTCAAACTTTTTA
ACCTTTTTGTTTCAATTATGATCCAGGTACATTTCTGTGATGTTGTCTGAGTGTTATTTTAAGGCCGCAG
GTACCCCATAACCTTACAAGACCTGTGGTTTTACTAAAGGACACCCTATGAAAACCTCTCTGTTTAAAAG
CCTTTACTTTCAGGTCCTGACAGCGATAGCCATTGGTATTCTCCTTGGCCATTTCTATCCTGAAATAGGC
GAGCAAATGAAACCGCTTGGCGACGGCTTCGTTAAGCTCATTAAGATGATCATCGCTCCTGTCATCTTTT
GTACCGTCGTAACGGGCATTGCGGGCATGGAAAGCATGAAGGCGGTCGGTCGTACCGGCGCAGTCGCACT
GCTTTACTTTGAAATTGTCAGTACTATCGCGCTGATTATTGGTCTTATCATCGTTAACGTCGTGCAGCCT
GGTGCCGGAATGAACGTCGATCCGACAACGCTTGATGCGAAAGCGGTAGCGGTTTACGCCGATCAGGCGA
AAGACCAGGGCATTGTCGCCTTCATTATGGATGTCATCCCGGCGAGCGTCATTGGCGCATTTGCCAGCGG
TAACATTCTGCAGGTACTGCTGTTTGCCGTACTGTTTGGTTTTGCGCTCCACCGTCTGGGCAGCAAAGGC
CAACTGATTTTTAACGTGATCGAAAGTTTCTCGCAGGTCATTTTCGGCATCATCAATATGATCATGCGTC
TGGCACCTATTGGTGCATTCGGGGCAATGGCGTTTACCATCGGTAAATACGGCGTCGGCACACTGGTGCA
ACTGGGGCAGCTGATTATCTGTTTCTACATCACCTGTATCCTGTTTGTGGTGCTGGTATTGGGTTCAATC
GCTAAAGCGACTGGCTTCAGTATCTTCAAATTTATCCGTTACATCCGTGAAGAACTGCTGATTGTACTGG
GGACTTCATCTTCCGAGTCGGCGCTGCCGCGTATGCTCGACAAGATGGAGAAACTCGGCTGCCGCAAATC
GGTGGTGGGGCTGGTCATCCCGACAGGCTACTCGTTTAACCTTGATGGCACATCGATATACCTGACAATG
GCGGCGGTGTTTATCGCCCAGGCCACTAACAGTCAGATGGATATCGTCCACCAAATCACGCTGTTAATCG
TGTTGCTGCTTTCTTCTAAAGGGGCGGCAGGGGTAACGGGTAGTGGTTTTATCGTGCTGGCAGCAACGCT
CTCTGCGGTGGGCCATTTGCCGGTAGCGGGTCTGGCGCTGATCCTCGGTATCGACCGCTTTATGTCAGAA
GCTCGTGCGCTGACTAACCTGGTCGGTAACGGCGTAGCAACCATTGTCGTTGCTAAGTGGGTGAAAGAAC
TGGACCACAAAAAACTGGACGATGTGCTGAATAATCGTGCGCCGGATGGCAAAACGCACGAATTATCCTC
TTAATCTCACCACTTATGCCCGCACTCCCTTCCCCGAGTGCGGGTGTTTGCGCATAATTGACCCCTGTGC
CTGAACTTACCACCTGGGTGAGTTCAGGTTTATTTCACTTCTTCCGTGACATTTTCATGTTCTTGCGGTC
TAACACGAAGTGTTTTTAACGTCATTTAGACTGACCGACAACGGGCAGTTTTTTTATTACCAGGATAGTT
GATCAGGGGTTCACATGCAGGGCACAAAAATTCGACTTTTAGCGGGCGGTTTGCTGATGATGGCCACTGC
TGGCTATGTGCAGGCAGATGCGCTCCAGCCTGATCCAGCATGGCAACAGGGGACGCTTTCCAACGGTTTA
CAGTGGCAAGTGCTGACCACGCCCCAGCGTCCCAGCGATCGTGTTGAAATTCGCCTGCTGGTTAATACCG
GTTCGCTCGCCGAAAGTACACAACAGAGCGGTTACAGTCACGCCATCCCTCGTATTGCGCTAACGCAAAG
CGGTGGCCTTGACGCAGCGCAGGCGCGTTCATTGTGGCAGCAGGGGATCGACCCTAAACGCCCGATGCCG
CCAGTAATTGTCTCTTATGACACCACGCTGTTTAATCTGAGTTTGCCCAATAACCGTAACGACTTGCTGA
AAGAGGCGCTCTCTTATCTGGCAAATGCCACTGGCAAACTGACTATCACGCCAGAAACCATCAACCATGC
GTTGCAAAGTCAGGACATGGTGGCAACCTGGCCTGCCGATACTAAAGAGGGCTGGTGGCGTTATCGTCTG
AAAGGATCAACCTTGTTAGGTCACGATCCTGCCGATCCGCTGAAACAACCCGTTGAAGCGGAAAAGATTA
AAGATTTCTATCAGAAATGGTACACCCCGGATGCAATGACGCTGCTGGTGGTGGGAAACGTGGATGCGCG
CTCGGTCGTCGACCAAATCAATAAAACGTTTGGCGAACTGAAAGGCAAACGTGAAACACCGGCTCCGGTG
CCGACGCTTTCTCCGCTGCGTGCGGAAGCGGTGAGTATTATGACCGACGCGGTGCGTCAGGACCGGCTAT
CTATCATGTGGGATACGCCGTGGCAGCCGATTCGTGAATCAGCCGCACTGCTGCGCTACTGGCGTGCGGA
CCTGGCCCGTGAGGCGCTGTTCTGGCATGTTCAGCAAGCGTTAAGCGCCAGTAACAGTAAAGACATCGGT
CTTGGATTTGACTGTCGTGTGCTGTATCTGCGTGCGCAGTGTGCCATCAACATCGAATCACCAAACGACA
AGCTGAACAGCAACCTTAATCTGGTGGCGCGTGAACTGGCGAAGGTTCGCGATAAAGGTCTGCCGGAAGA
AGAGTTCAATGCGTTAGTGGCGCAAAAGAAACTGGAGCTGCAGAAACTGTTTGCCGCCTATGCGCGAGCT
GATACCGATATTCTGATGGGGCAGCGGATGCGTTCGTTGCAAAATCAGGTCGTCGATATCGCGCCGGAGC
AATATCAGAAACTGCGTCAGGATTTCCTTAACAGCCTGACGGTGGAGATGTTAAATCAGGATCTGCGTCA
GCAGTTGTCGAATGATATGGCGTTAATACTGCTGCAGCCGAAAGGCGAGCCGGAATTTAACATGAAAGCG
TTGCAGGCGGCCTGGGATCAAATCATGGCCCCATCGACTGCGGCTGCCGCCACATCTGTCGCCACGGATG
ACGTACATCCTGAAGTGACGGATATTCCACCTGTACAGTAATGCATGATGGTGATGAGTTAGCACAACCA
TCAGGTATTTATGGATGAGCTGGATAGGGGGGTAACACTCTATCCAGCCTTTTGCATATGCTGCTTTTAC
GCTGGCATCGCTTCACGCGGGATAATCGCGCCGCGATACTGAATAACGGTACTTGCGGTCAGGTGCCCGC
GTTTCGCTGCGTCTTCCGCACTGCCGCCCGTCAAACGTACCGCCAGATAACCGGCACTGAAAGAGTCGCC
AGCTGCGGTGGTATCGATCACTTTTTCTTTCGGCAGTTTTACCGCCGGAACATCCACTAACCCTTCGCCA
GCAATGGACACCAGGCAAGAATCCGCCCCGCGTTTCACCACCACTTCTTTCACGCCCGCGTTATGGGTGC
GCGCAATGACGTCTTCCACCGGCTGTTGACCCCACAGCGCGTCTTCATCGTCCAGCGTCAGGAAGGCGAT
ATCCGTGCATTCCAGCATTTGTTGGTACACCTGCTGTGTCTCTTCTTTGCTGGCCCACAGGCGCGGACGA
TAGTTATTGTCGAAAATCACTTTTCCGCCGTTGGCGCGGCATTCGCGCAGCAGGGAAAGCAGCTTTTCGC
GGCTGGTCGGGCTTAAGATCGCCAGGCTAATCCCGCTCAGGTAGAGATAATCGAAATTCGCCAGCTCTTC
GCAAATCGCCGCGGATTGCTCACTCTCCAGCCAGAATTTGGCGGCAGCTTCGTTACGCCAGTAGTAGAAC
GTACGTTCGCCGGTGCTGTCGGTTTCAATGTAGTAAAGGCCCGGCAGACGGTTTTCCATCCGTTGGGTCA
GGGAAGTATCAACGTTCTCGCCGTGCCAGGCGTCCAGCATCTGCTGGCTAAAACTGTCCGTTCCCAGCGC
CGTTACGTAATGAACGGTTAATGCCGCAGGATCGACCTGACGGGCGATATAGACGGAAGTGTTCAGGGTA
TCGCCGCCGAAACCGCGCTTAACGTCCGCGCCTTTCTCGGAAAGCTCAATCATGCATTCGCCAATCACGG
CAATCTTTTTGGACATAGTCGTGAACCTGATCTGTAAAAAATTAGCGTTAGTTTGCGCTGTGGTGGTTTG
CTGGTCAACCATATTAAAACAGTGTTCCATTATTTTTTTGAGCCAGAACGTATTCCTGAAAGATTCCGTT
GTGGAGTGGGGAAATTTACCCCGGCCAGGCGGTAAAGTTCTGCCCTTGCGCGCCGATAATCTTTGTCGAG
TCCGGGCAGCATCACTTTTAAACACAGGACATCTTTGATGATAAGGCAGGTTATCCAGCGAATAAGCAAC
CCTGAAGCAAGCATCGAGAGCTTGCAGGAACGGCGTTTTTGGTTGCAGTGTGAGCGTGCTTACACCTGGC
AGCCGATCTATCAAACATGCGGGCGGTTAATGGCCGTGGAGCTATTAACGGTGGTCACGCATCCCTTGAA
CCCTTCGCAACGCCTGCCGCCGGATCGCTATTTTACTGAAATCACCGTTAGCCATCGGATGGAGGTTGTG
AAAGAGCAGATTGATTTGCTGGCGCAAAAAGCCGACTTCTTTGTAGAGCACGGCCTGCTGGCATCGGTCA
ATATTGATGGCCCTACGCTCATCGCCCTGCGTCAGCAACCAAAAATCCTGCGCCAGATTGAGGATCTTCC
CTGGCTGCGTTTCGAACTGGTGGAACACATCCGCCTGCCGAAAGATTCAACCTTTGCCTCGATGTGTGAA
TTTGGCCCGCTGTGGCTGGATGATTTTGGTTCCGGGATGGCAAATTTCTCTGCACTAAGTGAAGTGCGTT
ATGACTACATCAAAATCGCGCGAGAACTGTTTGTGATGCTGCGTCAGTCACCGGAAGGACGCACACTCTT
TTCTCAGCTTTTACATCTAATGAATCGCTATTGTCGCGGGGTGATTGTCGAGGGCGTAGAAACACCAGAA
GAGTGGCGTGATGTTCAGAACTCGCCCGCATTCGCCGCACAAGGCTGGTTTCTTTCACGCCCGGCACCGA
TAGAAACGCTGAATACGGCGGTTCTGGCGCTATAAGCTGCCTCATTTTCCGCCTGGCTGGACTATCTTTA
GGACTGGCACAGGAAGAATATGAGGAAGCGAACGATGAGCAAGGCAGGCAAAATAACCGCTGCGATTTCA
GGGGCTTTCTTGTTGTTGATTGTCGTAGCGATCATTTTGATTGCAACTTTTGACTGGAATCGACTCAAAC
CGACCATCAACCAGAAAGTCTCTGCGGAGTTGAATCGTCCGTTCGCTATCCGTGGCGATCTGGGCGTGGT
GTGGGAGCGGCAAAAACAAGAAACTGGCTGGCGCAGTTGGGTGCCGTGGCCCCATGTACACGCGGAAGAC
ATCATTCTTGGCAATCCACCGGATATTCCCGAAGTCACAATGGTGCATTTGCCGCGAGTAGAAGCGACGC
TGGCCCCGCTGGCGCTGCTGACCAAAACGGTCTGGTTGCCGTGGATCAAGCTCGAAAAGCCCGACGCGCG
CCTGATTCGCCTCTCCGAAAAGAACAATAACTGGACGTTTAATCTCGCCAACGATGACAACAAAGACGCG
AATGCAAAGCCGTCGGCGTGGTCGTTTCAGCTGGATAATATTCTTTTCGATCAAGGGCGGATCGCCATTG
ATGACAAAGTAAGCAAAGCGGATCTGGAAATTTTTGTCGATCCGTTAGGCAAGCCGCTGCCGTTCAGCGA
AGTTACCGGATCGAAAGGTAAAGCGGATAAAGAAAAGGTGGGCGATTACGTTTTTGGCCTGAAGGCGCAG
GGACGTTATAACGGTGAACCGCTCACTGGTACGGGAAAAATAGGCGGTATGCTGGCGCTGCGTGGCGAAG
GAACGCCGTTTCCGGTACAGGCTGATTTCCGCTCTGGTAACACCCGTGTTGCTTTTGATGGCGTTGTGAA
TGACCCAATGAAGATGGGGGGTGTCGATTTACGGCTTAAATTTTCTGGCGATTCGCTGGGTGATCTCTAT
GAACTGACGGGCGTTCTGCTGCCCGATACACCGCCGTTTGAAACGGATGGTCGGCTGGTAGCGAAAATCG
ACACTGAAAAATCGTCGGTCTTTGATTATCGCGGTTTTAATGGGCGCATTGGCGATAGCGATATCCACGG
TTCTCTGATCTACACCACCGGCAAGCCACGACCAAAACTGGAAGGTGATGTCGAGTCGCGGCAATTGCGG
CTGGCGGACCTGGGACCGTTGATTGGCGTTGATTCCGGGAAAGGGGCAGAAAAGTCGAAACGGTCTGAAC
AGAAGAAGGGTGAAAAAAGCGTTCAGCCTGCGGGCAAAGTGCTGCCTTATGACCGCTTCGAAACCGATAA
ATGGGACGTCATGGATGCCGATGTTCGCTTCAAAGGGCGGCGCATTGAGCATGGCAGTAGCCTGCCGATT
AGCGATCTTTCTACTCATATCATCCTCAAAAATGCTGACCTGCGCCTGCAACCGCTGAAATTTGGCATAG
CGGGCGGCAGCATTGCGGCGAATATTCATCTGGAAGGCGATAAAAAGCCGATGCAGGGGCGGGCAGATAT
TCAGGCTCGTCGACTGAAACTGAAAGAACTGATGCCCGATGTAGAACTGATGCAGAAGACGCTGGGGGAA
ATGAACGGTGACGCGGAACTGCGCGGTAGCGGTAACTCGGTGGCGGCGCTTTTAGGCAACAGTAACGGCA
ACCTGAAACTGTTGATGAATGACGGGCTAGTGAGCCGCAACCTGATGGAGATTGTTGGGCTGAATGTCGG
CAACTACATTGTCGGTGCGATATTTGGTGATGATGAGGTGCGGGTGAACTGCGCGGCGGCGAATCTGGAT
ATTGCCAACGGCGTGGCGCGCCCGCAGATTTTTGCTTTCGATACTGAGAACGCGTTGATTAACATTACCG
GCACGGCAAGTTTTGCTTCGGAACAGCTGGATTTGACTATTGATCCGGAGAGTAAAGGGATTCGGATTAT
CACACTGCGTTCGCCGCTGTATGTGCGTGGGACGTTTAAAAATCCGCAGGCTGGGGTGAAAGCCGGGCCG
TTGATTGCTCGCGGAGCCGTTGCGGCGGCACTGGCAACGCTGGTAACACCGGCGGCGGCGTTACTGGCGC
TGATCTCACCTTCCGAAAGGGAGGCTAATCAGTGCAGGACAATTTTGTCGCAGATGAAGAAGTGATGATA
ATTGCCGGATGTCTGACATCCGGCAATTAAAACGACTACAACGACTGGTGCCGCGTCTCATGCGTTAACA
GCAGGGCAATTAACGTCAGTCCGGCCATCGCCGCCAGATATAACCCCACCGCGCCTAACCCATAGTTAGT
CTGCAACCAGGCTGCGATATATGGCGCAACGGAAGCCCCGAGAATCGACGATACGTTGTAAGAGAACGAT
GCTCCGGTGTAACGCACTTCTGTCGGGAACAGCTCTGGTAACAGCGCGCCCATCGGACCGAAGGTCAGCC
CCATCAGACTTAACCCCAGCAGTAGGAAGGCAAAAACCAGAATCGGGTTGCCAGAACCGAGCAAAGGGTT
AAAGGCGAATAGCGCGAACAGGATGATCAGCGTGGTGATGATCACCATACTTTTACGGCGACCAAAAGCA
TCTGCCAGCAGACCCGCCAACGGAACCATCACTGCAAAACCGATAACCGCCATCATCAGCATCCACAACA
CTTCGTTACGCGGCAGGCCAAGCCCAACTGGCGCGGCGGCGGTACTAAAGGTCATAGAGTAGACCGTCAT
GATGTAAAACAGCGTATAGGTTGCCAGCATAATGAACGTACCCAGTACGGTTACGCGAACATGTTTGGTC
AGCAGCGTACCCAGCGGGATCTTCACCTGTTTTTTCGCTTTAGCGACTTTCTCAAACACCGGCGACTCAT
GCAGCGACACGCGAACATACAGGCCGATAATGACCAGCACCGCCGAGAAGATAAATGGCACACGCCAGCC
CCAGCTCATAAACTGCTCGTCGGTCAGTAGCCAGGAAAGCAGCAAGAAAGTGCCGTTGGCAAAGAAGAAG
CCAATCGGTGCGCCCAGCTGCGGGAAGGAGCCGTACAATGCACGTTTGCGCGGTGGGGCGTTTTCAGTCG
CCAGCAGCGCTGCGCCGCCCCATTCACCACCTAAGCCCAGACCCTGACCAAATCGAGCCAGCGCCAGCAG
CAGCGGGGCGAAAATACCAATCGTGGCATAGCCTGGCAGCAGACCAATCACCACGGTCGAAATCCCCATC
GTTAGCAACGAGGCGACCAGCGTCGCTTTACGCCCAACGCGATCGCCAAAATGACCAAAAACGGCAGAGC
CAATGGGGCGCGCGACGAAGGCGATGGCGAAGGTGGCGAGCGACTGTAGCGTTGCTGCCGTTGGATCGCC
CTGCGGGAAGAAGATATGCGGAAACACAATAACGGCCGCAGTGGCGTAAATGTAAAAGTCGAAGAACTCA
ATGGCCGTGCCAATGAGAGAGGCGACAAGGACTTTATTACGCGAGTTGATCGGCGTGTATTCTTGCTCGT
GGTCGAGTGTTGTGGCTGTTGCTTGCATAATCTTTTCTTATTTTTTGGCTAACGAATAGCCATATTACGC
ACAGCAAAAGTGATATTTCAATGTGTAACAAATCGCGGAAATGGTCAAAAATCAGGCAAAAAGGGGATAA
TGTTTAGGCCAGTGATTTTTCTTCTATGAAATGCTTCACATAATTTTATAAATGGTGGATTAAACTGGTT
TTAGGTTAAATAAAAGTTACCAACTGGATTTATATGCTGGGGTTATGAGTTGGAATGAAATTGTTTGCTC
CTGAATAGATGGCTAAAGAGGCTCTGGGAAAGAGTTTCAAGAGGTTATGTGCGCATTATAGCCGGATGCG
ATGCTGGCGCATCTTATCCGGCCTACGGGGAGCCAGGCCGAATAAATTCGTACGCCGCATCCGGCCTATT
TTAAGGCTGCGTTTTCCCCGGCATTCGCGGGTCGTCTTTATATTCGGCGGTGGCAATCCACGCCGCGCAA
AACAGCGTCAAACGGGCGAAGAAGTAGAAAAATGCCATCAGCCCCAGCACGGAACCAAATGCTGCGCCAG
AGGGTGATTTCATCAACGATGGCAGGGTGTAGGTCATCACGATTTTAATCACTTCAAAACCAATAGCAGC
CAGAAATGTTCCGCGGATCAGGGCTTTTTTGCGCGGACGGTGGCGCGGCAACCGCCAGAAGATCCAGAAG
AAAAGCAGATAGTTGGCGAAGATGGAAATCGCCAGGCCAATCAACCGCCATGTCGGTTTCAGCCACTCAA
TGCTGTTCAGGTGCAGGGCGCTAATAATCATTTGCTGCGCAGAACCGGCAACCGAGGTGATAGAAAGCGT
CACAATCAGCGCAATCAACAAACCAATCAGCGAAATAAAATCACGCAGATATTTTACCCAGAACTTCTCC
TGATCTTGCGGCGAGCGTTCCCAGACATCGCGTGACTGGGCGCGAATCGCTTCACGCAGGTTACCCATCC
AGTTGATGCCGGAATAAAGCGCCACTGCCAGACCGACAAGCCCTACAGTCGTACGCTGCTGAACGGCGGT
GTTGATGGTGTTTTTCAACGTGGCGGCTAGCGTCGGATCGCTAATGTTTTGCAGAATTTTGTCGAAGATA
TCCTGTAGCAACATCGGATGGGAGGCCAGCACAAAGCCCCCTGCGGCAAACGACACCATCAAAATGGGGA
TCATCGACAAAAATGAGAAATAGGTGATAGCCGCCCCAAACTGGTTACCCAGCCGATCGTTAAAGCGTTC
TGTCGCGCGAATCAGGTGCGCAATAACCGGTTGGCGTTGGACTTTCTCGGCAGTGGTGGTGACGGTTTCC
AGCGCCTGGCTAACTTTGCCGCCTTTCTCGCTATTATCCAACTGCTTAATCGGCTCGTGCTCCAGATCCT
GGGTGGGACGTTTGATCTCGTTTTCCTGCGTCATCCGCTCTTTTGTCCTTCTGTCGTGGTTATTCTTAAA
AAGTATAGTCGGTCAGTCCAGGTGCTCTTTCATTACGCCAGCCAGCCACTGCATAAACAGGTTTACACGC
CGGGAAAGCTCCCGACGCTGCGGATAAACCAGTGAAAGGGACAGCGGCTCGGCACGGTAGCCAGGCAACA
CTTCAATAAGCCGCCCGGCACGCAGGGCTTCGCGCACGGCAATGCGCGGGATCTGAATAATCCCCAGACC
GGCAAGACCGGCGGCGAGATAGTTTTCGCTACTGTTTACCGTCAACATGCCGCCAGACTTAAACCACTGG
ACGCCATTAACGCTGGCAACCTCAAAACCTAACGGATGTACACCCAGGTGCGGTGTATAACGCACTATTG
CGTGTGAAGTCAGATCATCGGGGCTTTGCGGATAACCAAAGCGCGTCAGATAGTGTGGACTGGCACAGTT
GACCATGGTCAGTTTGCCGAGAGAACGGGCGATAACGCCATCTTCCGGTAATGCGCCAGTGCGTATCACG
CAATCAAAACCATCATGAAGAATATCTACCGGACGGTCATGGCTACTCAGTTCCAGCTCAATTCCCGGAT
GCAGATAGAGAAATTCCGACAAGTGCGGCAGTAACAGGCTTTTCGCGATTCCTGACGGGATGTCGATGCG
TAATTTACCGCTGATACTGGTGGCATCCTGTTGAAACAGACCGTCCAGTTCGCTGAGATTACTCAACACA
TCTTTTGCTCGTTGATAATAGGTCATGCCTTCTGGCGTGAGTTTGACCCGTCGCGTGGTGCGCTGGAGAA
GCTGGGTGCCAAGTTGATGTTCCAGTGCCTGTATCTGGCGCGAAACACTTCCCTTTGGCAAAGCAAAGAA
ATCCGCCGCGCGGGAAAAACTTTCCAGCTCCGCGACTTTGATGAACAACTGCATTGCGTGAATTTTATCC
ATTTCTTTGACCGATTGTTGTTCACAACGAAACAGTAGCGCGCATATCGCATTGTTTATTGTTTTTTCTA
ACATCTAATGCCGGGTTTCACAATGTTGTCATGATGAATGTGGCGATTTCTCAGCAGGAAAAGGGAGGAA
TAGCTTTATGAGAAAGGTGAATTCCCTTAAACAGAGCGTATTTTTCAGCGATTCCCTTTAAAGTGAATAG
AAGATGTATTGGCTATTTGTGCTTATTTTTATCTCATTGCCGTTTGTTATTTTTGTTTATGGTCGCGGAA
TTTCATTTTTAATTGCATGCGTACTAACTACCGATATAAGGAAATCCTCAAAAATGTTTTAAATAGTGCC
CTCGACATATAATTTCAGGCGTTTAGCTGTAACTATTTATATCGGTAACTATTTTCTACGCGTCATCTCT
GTAGAATGGCCACCGCCAAATGGCGAATTCTTATTTTTTCTCGCGGGTAATACCCTTCCACTACTTAAGT
CTTTTTAACGTATTCAGGTGGAGATTCAGTTATGCAAATAGTCATGTTTGACAGGCAGTCAATATTTATT
CATGGAATGAAAATCAGTTTACAGCATCGTATTCCAGGAGTGAGTATTCAGGGGGCCAGTCAGGCAGACG
AGTTATGGCAAAAGCTGGAAAGTTACCCTGAAGCCTTAGTGATGCTCGATGGCGATCAGGATGGTGAGTT
TTGCTACAGGTTGCTGCAAAAAACCGTGGTGCAATTTCCTGAGGTTAAGGTGTTAATTACGGCGACGGAT
TGCAACAAACGGTGGTTACAGGAAGTTATTCATTTTAATGTGCTGGCCATTGTGCCTCGTGATTCAACCG
TCGAGACATTTGCGTTGGCGGTCAATAGTGCGGCGATGGGGATGATGTTTCTGCCTGGAGACTGGCGAAC
GACGCCGGAAAAGGACATTAAAGATCTCAAATCGTTAAGCGCCCGCCAGCGGGAGATTTTAACCATGTTA
GCGGCGGGCGAATCAAATAAAGAGATCGGCAGGGCGCTGAATATCAGTACCGGAACGGTAAAAGCGCATC
TGGAATCACTGTATCGCCGTCTGGAAGTCAAAAATCGCACCCAGGCGGCAATGATGTTAAATATCTCCTC
CTGAAGAGGATAATTTTACAGCCAGCAGGAAGTTAGCGGCTGGCTGTAAAAATATTATGGTTCGCCGTAC
AAACCAATTAAACGGCGTACCACACCGTTAGTCCAGCCAAACCCATCCTGCAACGGATACTCGCCACCGC
CGCCTTCGCGAGGAACACCATCGGCAATATGGTATTTCTCGATCAGTTTGTGCTGTTCCAGATAGAACTG
ATTCACCGTCTTCAGCCAGTTGCGCGCGATTTCATCACCCAGAAGGTCATCGCCGTACATCTTAAATCCC
TGAATTGCCATCCATTGTAACGGTGCCCAGCCGTTGGGTTTATCCCACTGTTCACCGGTTTCGTACTCGC
TTGCCAGAATCCCGCCAGGTGTCAGTAACCGGCTGCGCACGGCGTTTGCCAGACGATCGGCCTGTTCATG
GTTCGCCATACCGACATAGAGCGGCACAATGGCGGCAGCGGAAAACAGCGCCAGTTGCTCGCGTCGCCAG
TCGTAATCGCGGTAGATGCCGTTTTCATCATCCCAGAGGTAACGGTTTACCGCATCGCGACGGGCACTGG
CCTTCTGGCGGAACAGTGCTTCTGTCTCTTTCTCGCCTTTCAGCGCCGAGATGTTGGCGATGGCGCTCTC
CAGTTTAAACAGGAAGGCATTCAGATCGATGGGGATGAACTGGGTGGTACGAATGCTCGCCAGACGACCA
GTATCACGCAGCCAACGGGAAGAGTAATCCCAACCGGAGGCCGCCCCCGCACGTAAATCGCGGTACACCT
CGTTGGGCGGGCGACCAGAATGTTTCGCGGTTTCAACGTCCTCAAGCCAGGATTCGTCACGCGGCGTGTC
GCGATCGTCCCAGTAACGGTTGAGCAGCGAGCCGTCCGGCATCCGCACAACATGGCGATAGGCCTGATTA
GGGATCAACGATTCTGCACCGTCCATCCAGAAGGCATATTCCATTTTCAGGTGGTCGAGATAGCGGCGCG
CGCCGCGTACACCATCTTCTTCAAACAACTCCACCATCAGCGCAAAAACCGGTGGTTGCGAGCGGCTCAA
ATAATAGGTGCGGTTGCCGTTGGGGATGTGGCCGTAGTTTTCGATCATCCAGGCGAAGTTATCGGCCATG
CATTTCAGCAAATCTTCCCGACCACTTTCCGCCAGCCCCAGCATGGTGAAATAGGAATCCCAATAGTAGG
TTTCGCTAAAACGGCCGCCCGGGACAATATATGACTGCGGCAGCGCCAGCAGAGAAGACCACGGAATGTG
ATCCTGTGGTTCACGGGTTAGCACCGGCCACAGCTGGTCGATATGCTCTTTCAGGGAATTTTGCGGGTCC
GATACATACTCGCTGGAGTAGACCTCCGGCAGCCAGAAGTGGTTTTCAACAAACTTGCGCAAGTCAAAAT
CACGATGACGGCGCACTTTACGGTAGCGGATTAAAATATCCAGCGGGTCCATTTTGGGTGCGCAGTCGGG
AAAGGTTTTACTGTCGGGGAAAATTTTCGCCGACTGAACATGCTCGAACAGTTCGAGATAGCGATCGGCA
GGCGTCAGCGCATCAGAGGCGGGCAGCCCTTCAATCATCTCGGGTTCCGGTTCTGCCTCGATCATCTCAT
CCAGTTTTAATTCATACGGGTCCAGCTCATAGCAGAGATCGACCTCGATCATGAGTTCGTCTGGATTAGG
GTTTTGAATTTTCTGATTGAGCATAAGGATCCGACCTCCGAAATTCGTCGCTAATTATCGGGCTTTTCTT
TAAGGGTAGTCATTCGCTCCGCCTGGTGGGCGACAAAGCGTGCGGTGGATCACGTTTATTAACCTGCCAA
AAAATATAACGCACTAATATCAATGGAATTTATAAAAATACGGATTTCGTGTTGTTTTTCATTTTCAGAA
CATTCAATCCTGCTCTCGCCGCAATCATGATATGCCATTCCTGAGCTGGATAATAGGCACTGGCTATCTT
ATTGATAGTTTATATTCATGTAATTGATTGATTCCTATCAAAAAGCATATCTCCCTGTTTTTTATGATGG
CTTTGTCTCGCAGAGACGTTTGCAGCATTCTGGAAAATTTTCTGGGTCACAATAACTCACCACCGTGAGG
GAAGAATAATGAAAATGGTCTCACGTATTACCGCGATCGGCCTGGCTGGCGTCGCGATTTGCTATTTAGG
GTTATCTGGTTATGTGTGGTACCACGATAATAAACGCAGTAAACAGGCCGATGTTCAGGCATCTGCTGTC
AGTGAAAATAATAAGGTTTTAGGCTTTCTCCGTGAAAAAGGATGCGACTATTGCCATACACCTTCGGCAG
AATTACCCGCCTATTATTATATTCCCGGCGCGAAACAGTTGATGGATTACGACATAAAGCTTGGATATAA
ATCTTTTAACCTCGAGGCCGTGCGTGCGGCTCTGCTGGCTAATAAACTCGTTTCGCAAAGCGATCTGAAT
AAGATTGAATGGGTGATGCAGTATGAAACTATGCCGCCAACGCGTTATACCGCGCTACACTGGGCGGGTA
AGGTGAGTGATGAAGAGCGGGCGGAAATACTGGCCTGGATTGCAAAACAGCGTGCGGAATATTACGCCAG
CAATGATACTGCTCCGGAGCATCGCAATGAACCGGTGCAGCCCATCCCGCAAAAACTGCCTACCGATGCG
CAAAAAGTGGCGTTGGGTTTTGCGCTGTATCACGATCCCCGTTTATCGGCTGATAGCACCATTTCATGCG
CTCATTGCCATGCGTTGAATGCGGGGGGCGTCGATGGCAGAAAAACATCGATTGGTGTTGGTGGCGCAGT
TGGGCCGATTAACGCGCCGACGGTATTTAACTCAGTATTTAACGTTGAGCAGTTCTGGGATGGTCGTGCG
GCAACATTGCAGGATCAGGCTGGTGGACCGCCGTTGAACCCGATTGAAATGGCGTCGAAATCCTGGGACG
AAATTATTGCTAAGCTGGAAAAAGATCCGCAGCTTAAAGCGCAGTTCCTCGAAGTCTATCCGCAAGGTTT
CAGTGGCGAAAATATTACTGATGCCATTGCTGAATTTGAGAAAACATTAATTACGCCGGATTCCCCATTT
GATAAATGGTTGCGTGGAGATGAGAATGCTCTGACGGCACAACAGAAAAAAGGCTATCAATTATTTAAAG
ATAATAAATGTGCAACTTGTCATGGTGGTATTATTCTCGGCGGACGTTCCTTTGAACCGTTGGGGCTGAA
AAAAGACTTTAACTTTGGTGAAATTACGGCGGCGGATATTGGTCGTATGAATGTTACTAAAGAAGAGCGT
GATAAATTGCGTCAGAAAGTACCCGGTTTACGTAACGTTGCTTTAACGGCACCGTACTTCCATCGCGGTG
ACGTGCCGACGCTGGACGGGGCGGTGAAACTGATGCTGCGCTATCAGGTAGGCAAAGAGCTGCCGCAGGA
GGATGTGGATGATATCGTCGCTTTCCTGCACAGTCTGAACGGGGTTTACACGCCGTATATGCAGGATAAA
CAATAATTAATTTGATCGCCCGAACAGGAGTGTTTGGGCGATTTTTATTACGATAATAAAGTCTGTTTTT
AATATTATCATATTAAATGTTTATATTATAAAAAGTCGTTTTTCTGCTTAGGATTTTGTTATTTAAATTA
ATCCTGTAATACCTTGCTTCCATTGCGGATAAATCCTACTTTTTTATTGCCTTCAAATAAATTTAAGGAG
TTCGAAATGGACCAGAAGCTGTTAACGGATTTCCGCTCAGAACTACTCGATTCACGTTTTGGCGCAAAGG
CCATTTCTACTATCGCGGAGTCAAAACGATTTCCGCTGCACGAAATGCGCGATGATGTTGCATTTCAGAT
TATCAATGATGAATTATATCTTGATGGCAACGCTCGTCAGAACCTGGCCACTTTCTGCCAGACCTGGGAC
GACGAAAACGTCCATAAATTGATGGATTTGTCGATCAATAAAAACTGGATCGACAAAGAAGAATATCCGC
AATCCGCTGCAATCGACCTGCGTTGCGTAAACATGGTTGCCGATCTGTGGCATGCGCCTGCACCGAAAAA
TGGTCAGGCCGTTGGCACCAACACCATTGGTTCTTCCGAGGCCTGTATGCTCGGCGGGATGGCGATGAAA
TGGCGTTGGCGCAAGCGTATGGAAGCCGCAGGCAAACCAACGGATAAACCAAACCTGGTGTGCGGTCCGG
TACAAATCTGCTGGCATAAATTCGCCCGCTACTGGGATGTGGAGTTGCGTGAGATCCCTATGCGCCCCGG
TCAGTTGTTTATGGACCCGAAACGCATGATTGAAGCCTGCGACGAAAATACCATCGGCGTGGTGCCGACT
TTCGGCGTGACCTACACCGGTAACTATGAGTTCCCGCAGCCGCTGCACGATGCGCTGGATAAATTCCAGG
CCGACACCGGTATCGACATCGACATGCACATCGACGCCGCCAGCGGTGGCTTCCTGGCACCGTTCGTCGC
CCCGGATATCGTCTGGGACTTCCGCCTGCCGCGTGTGAAATCGATCAGTGCTTCAGGCCATAAATTCGGT
CTGGCTCCGCTGGGCTGCGGCTGGGTTATCTGGCGTGATGAAGAAGCGCTGCCGCAGGAACTGGTGTTCA
ACGTTGACTACCTCGGCGGTCAGATTGGTACTTTCGCCATCAACTTCTCCCGCCCGGCGGGTCAGGTGAT
TGCACAGTACTATGAATTCCTGCGCCTCGGTCGTGAAGGCTATACCAAAGTACAGAACGCTTCCTACCAG
GTTGCCGCTTATCTGGCGGATGAAATCGCCAAACTGGGGCCGTATGAGTTCATCTGTACCGGTCGCCCGG
ACGAAGGCATCCCGGCGGTTTGCTTCAAACTGAAAGATGGTGAAGATCCGGGATACACCCTGTACGACCT
CTCTGAACGTCTGCGTCTGCGCGGCTGGCAGGTTCCGGCTTTCACTCTCGGCGGTGAAGCCACCGACATC
GTGGTGATGCGCATTATGTGTCGTCGCGGCTTCGAAATGGACTTTGCTGAACTGTTGCTGGAAGACTACA
AAGCCTCCCTGAAATATCTCAGCGACCACCCGAAACTGCAGGGTATTGCCCAGCAGAACAGCTTTAAACA
CACCTGATAACATCACGTTGTAAAAACCGAATGCCCAACCTTTAAAAACAGGTGGGTATTCGGCTACTTA
TTAATTGCAATAATATATTACCTGTCTATTCATCGTGTTGATAAGATATATGTTATATGAATGTTATGGA
GCATAGCGATACTGCTTAATATTACGATGATGAATTATTTGCTTACTATTAATTCCTCTTCGTTCTTAAG
TCCCCTTTTTATATAATAAATCCAGTCATCCAGCCCGAGTATCATCGCTCATTATCATCCTGTTTTCCCG
CTTCGTTTAAATTTATTTATCAATCAATTTGACTTAAGAGGGCGGCGTGCTACATTAATAAACAGTAATA
TGTTTATGTAATATTAAGTCAACTATGCAACCACTACATGGTAATTGTCTAATTGCGTACGCAAGACATA
AATATATTCTCACCATGGTTAATGGTGAATATCGCTATTTTAATGGCGGTGATCTGGTTTTTGCGGATGC
AAGCCAAATTCAAGTGGATAAGTGTGTTGAGAATTTCGTATTAGTTTCAAGAGACACGCTTTCATTATTT
CTCCCGATGCTCAAGGAGGAGGCATTAAAACTTCATGCACATAAAAAAGTTCCTTCATTACTCGTTCATC
ACTGTACCAGAGATATTCCTGTTTTTCAGGAAGTTGCGCAACTATCGCAGAATAAGAATCTTCGCTATGC
AGAAATGCTACGTAAAAGGGCATTAATCTTTGCGTTGTTATCTGTTTTTCTTGAGGATACGCAATTTATA
CCGTTACTTCTGAACGTGTTGCAACCGAATATGCGAACACGAGTTTGTACGGTCATCAATAATAATATCG
CCCATGAGTGGACATTAGCCCGAATCGCTAGCGAATTGTTGATGAGTCCAAGCCTGTTAAAGAAAAAATT
GCGCGAAGAAGGTACGTCATATTCACAGTTGCTTACTGAGTGTAGGATGCAGCGTGCTTTACAACTTATT
GTTATATATGGGGTTTCAATTAAGCGAGTTGCAGTATCCTGTGGATATCACAGCGTGTCGTATTTCATTT
ACGTTTTTCGAAATTATTATGGGATGACGCCCACAGAGTATCAGGAGCGATCGGCGCAGGAATTACCGAA
CTGTGGCCCGGCGGCAAGTATGGCTGCGCAAGGGAATTTTTACGGCACTGACCGTTCTGCGGAAGGAATA
AGATTATAGAGTTTTACTCAGACATAAAAAAAACCCGGCATAGGGGACCGGGAAGAGGATAGTCTGCCGT
CTCCAGACTAATAAACCGTTATAACACTCCCTGTTGGCACGGGAAACTTTGTGCTCTCAGTAAGTTAAAT
ATAACTTTTACTGGAAATAAGATCAGCCATTTTTTTATAAACATAAGCTATACGCTGTGTGAAAATATAA
TCGTGTTGCATTTACTTATTATCAATTAACTGTTATGCAAAACTACTTTGTGGATAAAATTTGGTCCTAC
CAAATATGGCAGTTTTTGCACACAGAAACAGTCTGGCGTCATTTCATTAGTATACTGACATTGAAATAAT
CGCAGTAATGAAATATAAGGAATAGTCATGACTCATGTCTGCTCGGTGATCCTCGTTCGTCGTTCATTCG
ATATTCATCATGAACAGCAAAAAATATCGTTGCATAACGAGAGTATCCTGCTGCTGGATAAAAATTTGGC
AGACGATTTTGCGTTTTGTTCACTGGATACGCGACGGCTGGATATCGAAGAGCTGACAGTTTGCCATTAC
TTACAAAATATTCGTCAGTTGCCACGCAATTTAGGATTGCATAGCAAAGACCGTTTGTTAATTAACCAGT
CACCCCCCATTCAGCTGGTGACGGCGATTTTTGATAGTTTCAATGACCCCCGGGTCAATTCGCCGATACT
GAGCAAAATGCTCTACCTTTCCTGTTTATCAATGTTTTCTCATAAGAAAGAACTGATCCCCTTACTTTTC
AATAGTATCAGTACTGTTTCAGGAAAAGTTGAACGCCTTATTAGCTTTGATATCGCTAAACGTTGGTATC
TACGCGATATCGCAGAAAGAATGTACACCAGCGAGAGTCTCATCAAAAAAAAGTTGCAGGATGAAAATAC
CTGTTTCAGTAAAATATTACTCGCCTCCAGGATGTCGATGGCCAGACGATTACTCGAGTTACGTCAAATA
CCTCTGCATACTATTGCGGAAAAATGTGGCTATAGCAGTACGTCATACTTTATAAATACATTTAGACAAT
ATTATGGTGTAACGCCACATCAGTTTTCGCAACATTCGCCGGGTACCTTTTCCTGACATATTTCGCATTT
GAATATTGGTCAGGATCTCACGTCTGCTTCATGTGAAACTCTTTCCTGATGATTTCTGACGAGCTACCGG
CTAGTTCTCTTTCGCAGTTTGCCAGGCGGTATAGGTATTTTCAGGAGGAAAAGACTCGGCATGTTTGGGA
TTATTAAGCTAACAATTCATACGATTACGGGAATGTGGGTCAGTATTGTGCTGTTCAAATTGATGACGAA
TGGCTGGAGTGGTTTCTACTTTCAGTGCTGTGTACTAAGCCTGGTATTCCTGACGGTTAGCTGGTTGTTG
AGTGGTGAATGGTTAGCAGGAAAGAGTAAGGCTGAACCTTCACGTTCAACCTTACTCTCATTTACACGTT
ACGCTTTTTTAAAGCGGGCAAAGAGATGTTCCACTACAACGAAAAAGACCGGAACGAAGTAAATTGCCAG
CACTGTTGCGGCAAACATCCCGCCCATTACGCCGGTACCTACCGCGTTTTGCGCGCCAGAGCCGGCACCA
TGACTGATAACCAGCGGCAGCACGCCGAGAATAAAGGCCAGAGAAGTCATCAGGATTGGGCGTAAACGCA
TACGCGCTGCTTCGATGATTGCCTCTACCGGCGTTTTCCCTTCTTTCTGCATCATCTCAACGGCAAATTC
GACAATCAGGATGGCGTTCTTGGCGGAAAGCCCGATGGTGGTCAGCAAACCAACCTGGAAGTAAACGTCA
TTACTTAAGCCGCGCAGATCGGTGGCCAGTAATGCGCCAACGACGCCTAACGGAACAACCAACATCACCG
AGAACGGAATTGACCAGCTTTCATAAAGTGCGGCGAGGGCGAGGAACACCACGACCAGTGAAATGGCATA
TAGCGCGGGAGCCTGGTTTGAGGATAACGCTTCCTGATACGACAGCCCGGTCCATGAGTAGCCGACGCCT
GCCGGAAGTTTTGCGACCAGGTCTGCCATAAATTTCATGGCGTCACCGGTACTTTTCCCGGCAGCCGCTT
CACCTAAAATCTCCATTGACGGGATGCCGTTGTAGCGTTCCAGTCGCGGTGAACCATAGGTCCATTCGGT
AGACGAATAGGCAGAAAGCGGTGCCATCGTGCCAGAGGCGTTGCGTACATACCATTGGTTGATGTTATCC
GGCAACATACGGAACGGCGTGCCTGCCTGGACATACACTTTTTTCACCCGCCCCTGGTTGAGGAAGTCGT
TCACGTAGCTGCTGCCGAAGGCGGTGGAAATTGTCTGGTTGATATCAGACAGCGCCACACCCATAGCCTC
GGCTTTCGCAGCGTTGACGTTCACTTTGAACATCGGCGTATCTTCCAGGCCGTTCGGGCGTACCCCGATG
ACCTGATTCGGTGATTGCGCTGCCAGTGATAACAGCTCGTTTCGCGCCTGGGTCAGCTTTTCGTGCCCCA
GATTGCCGTTGTCCAGCAGTTCCATATCAAAACCTGACGCGGTACCCAGTTCAGCCACCGCGGGTAAGTT
GAACGGGAAGACGACGGCTTTATTGATACTGCTTAGCGCAATCATTGCCCGCTGAATAATCGCGGTAACC
GAGTTTTCCTCGCCGACACGTTCAGACCACGGCTTGAGGCTGATAAACGCCAGACCGTTGTTTTGCCCCT
GACCACTGAAGCCAAAGCCACCAACGGTAAACACCGACTGAACATTATTTTTCTCTTTTGTCAGATAATA
ATCCGTCACCTGTTGTAGCACTTTCGTGGTGTTAACCATGGTTGCACCGGAAGGTAACTGCGCGGTGGTC
ATAAATACCCCCTGATCCTCTTCTGGTAAGAAAGAGGTCGGCGTACGCAGGAACAGCACCGCCATCCCGG
CGCAAATCAGCAGGTAGACCACCATGTAGCGACCGGTACAACGCAACAGCGAGCGGGTGCTGTCGGTATA
GTGCTGAGTTGATTTTTCAAACAGCGTGTTGAAGCGTGCGAACAGGGCGTTAGGTTTGTGACCGCCCTCC
GGCGCGGCTTTCAGAATGGTGGCGCACAGGGCAGGGGTCAGGCTCATTGCTACAAATACTGAAAGCAGCA
TGGAGGAGATCAGCGTGATGGAGAACTGGCGGTAGATCTCCCCGGTCGCACCGCTCATAAAGGCCATCGG
CATAAACACTGCGGAAAGAACAACGGCAATCCCGACCAGCGCACGTTGGATCTGCCCCATCGATTTATGC
GTCGCTTCCTTCGGCGGTAGCTTATCTTCCGCAATGACACGCTCGACGTTCTCCACCACCACGATGGCGT
CATCCACCAGTAACCCTATCGCCAGCACCATCCCGAACATAGTTAACGTGTTGATGGTGAAACCGACCGC
CGACAAGATCGCAAACGTCCCGAGAATAACCACCGGTACGGCAATCGTCGGGATGATTGTGGCGCGGAAA
TTCTGCAAAAACAGATACATGACCAGGAAGACGAGGATGATAGCCTCAACCAGCGTTTTGAAAACTTCCT
GAATAGAAATTTTGATAAACGGTGTGGTGTCGTAAGGATAAACCGTCTTCAGGCTTGCAGGGAAATAAGC
CGATAAACGGTTCAGCTCCTCTTTCACCGCTCGCGAGGTATCCAGGGCGTTTGCTCCGGTAGCCAGTTTG
ATGGCGATCCCGGCAGCAGGTTTGCCGTTATAGCGCGCCACGGTGGAATAATCTTCCGCCCCAAGTTCGA
CGCGGGCGACATCACGCAGCAGCACTTGCGAACCATCTTGCTGAACTTTCAACAGGATTTTGCCAAATTC
TTCCGGCGTTTGCAGACGCGTCTGCACAATGATCGAGGCGTTCAGTTGCTGGTCTGCCGCCTGTGGCATG
CCACCCAGTTGACCACCGGAAATCTGGTTGTTTTGCACCTTAATCTGGGAAATAACATCGGAAGGTACCA
GGTTATATTTATTGAGTTTTTGCGGGTCCAGCCAGATACGCATGGCGTACTCGGAACCAAAGAGCTGTAC
GCTACCAACGCCCGCGGTACGGCTTAGCGGGTCTTTGATATTAGACGCTACATAGTCCGCGATATCGTAC
TGGTTGAGGCTGCCGTTATCAGAAATAAATGCCGCTACCATCAGGATATTACTGCTCGACTTATCGACGC
TAATCCCCTGCTGCTGCACCGCTTCAGGTAATGAAGGCATAGCGAGTTGCAGTTTATTTTGCACCTGAAC
CTGTGCGATATCAGGCGATGTCCCCGTCTCGAAGGTCAGAGTGATGGAGGCATTACCTGCCGCATCGCTG
GTTGAAGACATGTACATCAGGCCATCAAGCCCATTCATATTTTGCTCAATCACCTGAGTGACCGAGTCTT
CTACCGTTTGCGCATCGGCACCCGGATAGGTTGCGCTGATGGTAATGGTCGGTGGCGCAATCTGCGGATA
CTGCGCAACCGGTAAGTTCATGATCGCCAGACCGCCTGCAAGCATCATAATAATGGCAAGTACCCAGGCA
AAAACCGGGCGATCAATAAAATAGTTAGCCATGAAAGTCCCCTTAAGCCTGCAACGTTATTGTTTCGATT
CGGTGCTGGCGTTTTCCTGGCTGGAGGAAATTGCACGTGCTTTGATACCCGGACGAATGCGTTGCAAACC
GGAAACGATCACCCGATCGCCAGCCTGCAAGCCAGAGGTGACAACCCACTGGTCGCCGATGGCTTTGCTG
GCTTCGATTTCGCGTAGCTGCACGACATCGTCTTTATCCAGAATGAGTGCCGTTGCTTTACCCTGGGCGT
TGTGGGTGACGCCTTCCTGCGGCACCAGTAATACATTCTGGCGGCTACCTTCATCCACTAATGCCGTGAC
ATACATGCCAGGCAGCAAGTCACCATTTGGGTTGGGGAAAATCGCCCGTAACGTCACGGAGCCCGTGGTT
TCATCCACCGTCGGGTCGGAGAATTTCAGCGTGCCGGTCTGGCCGTAACGTTTACCATTTTCCAGATTGA
GCTGTACTGGCGTACTGCCCTGAACCTGTTTGATTTGCCCACTGGCGACCTCTTCTTTCATGCGCAAGAA
ATCCTGCACCGACTGCGTGAGATCGACATAAATCGGGTCCAGACGTTGTACGGTAACCAGCGAATCTGCC
TGATTAGCGGTAACGAGTGCGCCGACGGTCACCGACGATTTCCCGCTGACGCCCGTAATCGGCGAGGTGA
CATTCGCGTATTGCAGATTGATCGTCGCCTGTTCAACAGCCGCTTTGGCGACGGTGACATTGGCTTCTGC
TTCATTCAACTGGGTGCGCGCGGTGTCGTAATCCTGACGGCTAACATAGTTGGTCTTCAGCAACGATGCC
TGGCGGTTAAAGGTGATGCGGGCATTGCTGGCGGTAGAGAGCGCTTTCGCCAGCGAGCCTTTGGCGGAGT
TCAGCTCTGCCTGTAAAGGCGCAGGATCAATCTGATACAGCGAATCGCCCTGGTTCACTTTATCGCCTTC
GATAAAGTTGCGTTTAATGATAATACCGCCCACCTGGGGACGTATCTCGGCAACTTCATAAGGAACGGTT
CTACCGGGCAATTCGCTCAACACATTGACCGAACCGGGGGAGAGTGTGACGACACCGACCTCAGGCGTCA
TGGCGGCGGCGTTTTCCGCCGATTTGTCATCGCAGGCGGTGAGCATCGCGCCGCAGAATAACAACGGTAT
TAACAGTTTTCTTCTTCTGTTCATTTTAGTCCCTGAAAATTCTTGAGAAATAACGGTTCTTTAAATTGCG
CGCGAGGAGAGATATGAGGGATTTACAGACCAGCGGCATAGTGGGGTTGTCAGCCAGTAAGATGGGATGC
AAGCACAGTGATCGACATGGTGAGGTCAACGACAAAAAAAATGTTGCCGTTCTGCCAACAGTTTCTGCCA
GCATTCGGGCAACGAAGGGTTCTACTGGTGGATACACATACCAGGGGAATAAAGTCGTTTTCGTCTCTCC
TTCAATAATCACCGGGGGTATTGAAATCAGCATCTGCATCCCTCGTCATGCCAGCCATCAATTTCAGTTG
CTTATGTCCTTACTAAAAATAAGATGTGATACCCAGGGTGACGATGTCGCTCATACGTCTTAATTTCAGC
TTGTACATAATGTTGAATTTCTGAATCTTTAATGTTTGTTGCGAAATGTTGAGCGTTGACGTGATATTGC
TTTCATTTTTGTTTTTCAGAATCAGTTGCATAATTTTGAACTGATTATGTGAAAAACATAGTTGTGAATT
CTTATGGGGCAAGTGTTTACCATAAGTAATCTCAAGAAGATTTTTGATACTTTCTTTACGGCTGACAAAA
TAAATAGGCGCTTTAGCTTTTAGTTTACTGATGTGATAAGGTGCCAAAACAATAATTCTCTCGGCATCTA
ATTTCTCCAGGAATTTAATCGCTTCTTCATCAAGGATATGGTTGTGATAGGTGTCAATGATCACCTTGAA
GGGTTTATTGCCTACTTTTTTGATCTCTGACAGGGAATTGATTTTTATCATTTCGTGATTATCTTTCAAC
TGCCAAAAGCCCTGTAAAAGAAAAGAATCTTTCGTCATGAGAAAAATCATAACTTGCTCCTTAGCCGTTA
TCGTTTCGAACATGTCATCCTTTCCATTATTTACATCCTTGTCCGAATCGTTGTTCAATATAGTAAACGC
CTATAAGAACTTTGCCCTTCGTGAACTAATACGTCTATTAACACTAATCAATACTTCAGATTTATCCATC
ACGCACTCCATATATTGGTCCTAAGTAAGATTCCTGGTTGTTATCAATTTGTAACTAGTAAACAAAAGGT
TAACTTTTGCGGATTGCTGCCCAAGAATAAGTTATCAATAACCAGTTTGTGATCTCTGAAGAATATTACT
AAAGTTAAAATGTAATCCGATTTAAATATCGAGTCTCCTTGTTTCGACTTAGGCTGGCAATTGGATTGCC
AGCTTTCTTTTAACGCATTAAAATTACCTGATTAAATAACTCATTCATGTCTTCAGGTTTTTATATAGCG
TCTGGAGACACGGATATTTATGCAATGTAATCAACGCCAGTTGCAAAAAAATGAACCCGGATTGCTTATT
TAACCGCCCATAGCATCAACGCTTACGGAACTCTTTGTTCACTTTCCCACAGCACTTTTAAAACATTAAA
CCTGACCACGGAAAATATCAGCCATGATAATGTTTGAAATGGCTAATTTGCCATGGAACGAAAAAAATCA
GATTAAATTCAGTAGGTTGAAATAATCAACAGCAGGCAATTGTTTCAATGATAGTGCGTAATTGAACTGA
AACACTGTATAGCTAAGAGAGTATTAACTGGATCATAGTCACTTAATGTGACTATGATCCAGGTGGAAAT
AGGGATAATTATTGCTTTTTAACGAACAAACTGGCGAAGCTGAACAGACTGGCGGCGCTAAATATCAGTT
CAATTCCCACCAGTGTGGAAACCAGCGTTACCGACACCATCGGCGTAGCACCAAGGAATATCCAGGCAAT
GACGATATCCAGCACACCAATAACGAGCTGTAGCCAACTGCCTTTCATTGAACGCTGACGATACCAACTC
ATCAGGCGAATAACCCCTGCCACACAGAACAAACCGGCAATAAATGCCGCAATGGCAAAAATGCCCAGCT
CTGGTGCACGGATGAAGAAATAGCCGATCAATAAATAGGCGACTGCGACGAGGAAACCGGATAATACCGG
CCAGAAATTATGACTGCGGTTGCTGAATAGCCCGACAATAAGCGCAATGCCCGAGCAGATTAATAATGCA
CCCACTACTGTGCTTAAAATGTCGCCAGAGACGAACGGAAAACTGATACACAGCAACCCGACGATAAACA
GCAGCACGGCAATAAACTGGATTGCTCTGCGATGTTTTTTAAGCATCTCCAGATCAAACTTCAAAATTGT
TGCCTTATCTATATATAACATAGAACCACCCTATAAAATTAAGAAGAAAATCCCCTGCTATCAATCTATG
CCAAAAACGCGTCTAAGAATGCAGTCGATTTAATAAAAATTTCCTAATTACAGTATCTGATGCATCTGTA
ACTCATTGTATTGAAATAAAAATATCTGATTTTGATATTTTCCATCAACATGACATATACAGAAAACCAG
GTTATAACCTCAGTGTCGAAATTGATTCGTGACGGCTCTTTCACTTTATAGTTGAGGATATTACGATGAA
AAAAGTATTAGGCGTTATTCTTGGTGGTCTGCTTCTTCTGCCAGTAGTGAGCAATGCAGCGGATGCACAA
AAAGCAGCTGATAACAAAAAACCGGTCAACTCCTGGACCTGTGAAGATTTCCTGGCTGTGGACGAATCCT
TCCAGCCAACTGCAGTTGGTTTTGCTGAAGCACTGAACAACAAAGATAAACCAGAAGATGCGGTTTTAGA
TGTTCAGGGTATTGCAACCGTAACCCCAGCTATCGTTCAGGCTTGTACTCAGGATAAAAAAGCCAGCTTT
AAAGATAAAGTTAAAGGCGAATGGGACAAAATTAAGAAAGATATGTAATTCCGGGAATGCGTTACATCGT
ATTTCCTTGCATATTGAACAGGCCGGAATATCTTCTTTAAAAGCAGCTATTCCTCCTGTTTGTATATAAT
CTCTATATTGAATGGGTTACAAAATGAACATTTCATCTCTCCGTAAAGCGTTTATTTTTATGGGCGCTGT
AGCGGCTTTGTCACTGGTGAACGCACAATCTGCGCTGGCAGCCAATGAATCCGCTAAAGATATGACCTGC
CAGGAATTTATTGATCTGAATCCAAAAGCAATGACACCAGTTGCGTGGTGGATGCTGCATGAAGAAACAG
TATATAAAGGTGGCGATACCGTTACTTTAAATGAAACCGATCTCACTCAAATTCCTAAAGTGATCGAATA
CTGCAAGAAAAACCCGCAGAAAAATTTGTATACCTTCAAAAATCAAGCATCTAATGACTTGCCGAATTAA
TAAGGTACAAGTAAAAAGGAGTAGCAAGTTGAGCCATCTTGCTGCTCCTTTTTGCATTTTTATATGACAG
CAGAATTTATTATACGACTTATACTTGCGGTAATTGCCTGTGGCGCTATTGGCATGGAAAGGCAAATGCG
CGGCAAAGGAGCAGGGTTACGTACACATGTATTAATTGGCATGGGAAGCGCCCTGTTTATGATTGTTTCG
AAATATGGTTTTGCTGACGTGCTGTCTTTAGGTCACGTCGGACTGGATCCCAGCCGTATTGCTGCTCAGG
TTGTGACGGGCGTCGGGTTTATCGGTGCAGGTAACATTCTCGTTCGTAACCAAAATATTGTAGGTCTGAC
GACGGCAGCGGATATCTGGGTGACCGCAGCCATTGGTATGGTTATTGGCAGCGGTATGTACGAACTGGGT
ATTTATGGTTCAGTGATGACCTTGCTGGTGCTGGAAGTCTTCCATCAATTAACCTTCCGCCTGATGAACA
AAAATTACCATTTACAGCTGACATTAGTGAACGGTAATACGGTATCAATGCTCGACTGGTTTAAGCAGCA
AAAAATAAAAACGGATTTAGTTTCGTTGCAGGAAAATGAAGATCATGAAGTGGTCGCCATTGATATCCAG
CTTCATGCCACAACGTCGATAGAAGATCTGTTGCGATTATTAAAAGGTATGGCAGGGGTGAAAGGCGTTT
CAATTAGCTAATCTGTATAGTTATTTATTCGCAGGAGTACCAGGGCGGTACTCCTGTTGGTTTTAATGAT
CGAGGACGATCAGTGGTGAATGGTTGGCAGGATCTTTAAGTACGGTAATATCCGCGCCGTAGAGCATTGT
CAGCGCCTGCTGTGTCAATACGTCCTGCGGCTTACCATTTGCGATAACCTTTCCTTTTTGCATTAATACA
ACACGGTCTGCATAACGCGCGGCAAGATTTAGATCGTGCAATACGCAGCAAACATTGAACTGCCGTTCGT
GAACTAACTGGCGTAATAAACGAAACAAGTGCTGCTGATGGTGAATATCCAGCGCCGAAGTTGGTTCATC
AAGAAATAACCATTTCGGTGAGGGAGTAGGTTCCCAGAGTTGCACCAGCAGGCGCGCTAATTGCACGCGC
TGTTGTTCACCACCGGATAATTGCCGATAGTCGCGGTTTGCTAACGCCTGACAGTCACATAACGCCATTA
TTTGTGCTGTTTCATTATCCTGATTACCAGTACGATGCGGATGCCGCCCCATCTGGATAACTTCTTGTAC
GCTGAATGGAAACGCCATGTGGCTATTTTGACGCATCACGGCCCGGTGTTTCGCCAGTTCAGTAATCGAC
CATTCATTTAATGGCTTATTAAACAACCAACATTCGCCGCTATCAGGTTGAAGATAGCCGGTTAGCTGGC
GAAGCAGCGTAGATTTTCCCGCACCATTAGGGCCGAGGATGGCAACAATTTCCCCACCGGGAAAAGTCAG
CGAGACATTATCAGTCAGACGCCGCCCCTGAAGGCTATAAACCAGATTCTGGGCGCTGATCATGTGATCC
TCCGGTTGCGCAGAATCAACCACATAAAATAAGGGCCACCAAGCAGGCTGGTTAATAATCCCACGGGCAT
TTCTGCTGGCTGTACCAGCGTGCGGGCAAGCGTGTCTGCCATCAGCAATAAACAGGCTCCGGCGAGGGCG
GAACAAGGGATTAGCCAGCGGTGATTTGCCCCGGTAGTCATGCGAATCAGATGCGGGATCACCAGGCCAA
TAAAGCCGATAATGCCGCTTACCGATACGGCAGCACCAACGAGCAGTGAGCTCACTAACAGTAATTGCTG
GCGTTTACGCTTCACGTTCACGCCGAGGTAGTGGGCTTCTTCATCACCGAGCTGCAGTAAATTCAGCGTT
CCGGCGAGACAAGTTGTTGCGATAATGGCCGGTAGGATGAATGAACTGGCAACCAATAACGTCGGCCATT
GCGCCTGTCCAAGATTGCCCATCATCCACAATGTGAGTTGTCGTAGCTGCTGCTCATCGCCGATATAGCT
CAGGATGCCGATCGCTGCGCCGCACAGGGCATTGATGGCGATACCGGCGAGTAATAATTGCATCATGCTG
CCATCGCGATGGCGCTGCGTGATGAGAAAAATGATGGTGCAGACCACTAAACTTCCGGCAATGGCAAACA
CCATTTGCTCATAGAGCACCAGCACCACTGGGAAGGAGAAGGGCAGCACAATAGCAACGCCAACCATTAA
TGCAGAACCGCTACTGACGCCAAGTAATCCAGGGTCAGCCATTGGGTTGCGAAAAAGCCCCTGCATAATT
ACCCCTGCGGTTGCCAACGCTGCACCTACCAGCACCGCCAGCAAAACCCGTGGTAGACGAATATTGAGCC
AGATATCGCGGTATTCCTCATCAAAAAGGGCATCAAAACTGATCTTTAACGCTCCCTGACTGGCACTGAA
CAGCACCAGAGCGAGCAATAATAGTGATAGCCCCATAAAGATCCTGGCGGAAGAGAGTGAATCCTTGAGC
ACGCAAAACTCCGTTACGACATTACGGCGCGGATATGCCGCGCCGGGGGATCACGCCGGTTTCAGGTCCG
GTTCAATCAGACTGTAGACCTGCTGGTTAAGTGCTGGCGCATTTGCCAGTTCATGGATATGTGCGGCGAC
ATCAGCACGGTTAACAAAACCATGACACTCCTGATTTTGTATCCGTTGTGCTTTGCCCGTTGCCGCACCA
TCAAGCAGACCGCCGGGGCGGAGAATGGCATAATCAAGCTGGCTGGTTTGCAACCAGGTTTCCGCCAGCG
TTTTTTCCCGTACCGCCTGACCAAACGCAGCCTTTGCCCGCTCTGATAAAAACGGCCAGCTATCGCTGCA
TCCCAAAGAGGTCACCAGAATCATGCGACTGATGCCAGCCTTCTCGGCCTCATCAATCACTGTTCTGTGC
GCCAGATAATCCTGAGCTCCGCCCATTGTTGAGATGATAAGCGCATCCGGGCCAGCTGCGCGGCAAGCAG
CCGCGACTACGCTGGCATCACAGGCGTCGCCTGTAAAAACCTGTACGCCTTGTTGCGCCAGTTTCATGGC
GGCATTGGCATGACGAATGACAGCAACGACCGGACGTTGTTCCGCCAGCGCCAGTTCAAGCGTTCTGGCA
CCCACACCTTTTCCGCCTGCGCCAAAGAGTAGCCACGGTGTCATCAGGCGTGTTCCTTTAACGATGCTGC
CAGAGCATGGAAGGCGCTGACTTGTTCGCTCAGGAGCTGACGATGATCATCCCTACCGAGGAAGATTTTC
AGCATTGCGCTGCCTTCCTTATTGAAAAAGAGAATAGAGGCGGTGTCCATGCCCATAAATTTACGTTCGA
TCAAGGCAATATGCGTGCAGTTTTCTGCTTTGATATGCCCGGACATGCCGTGCTTTCCGCGTAGGTTGAA
ATAGCCGTGGCGATGGAAACCCGAAGGCAGTTCGCCGCTAAATTCGAGTATTATATCGGTAGTATGTACT
AACGTGGTGACGTTGCCCCATTCGCAGACGGTATCCCAGACAGTATCGAATTTATCACCTGGCACAACAG
TCGGAGAGGGCAGATTTTTCACTACCTCCAGCAGCGTGGTGTTGTATTGTTCGGCGATCGCCTCCAGCGT
ACCGTCTGGCTCCGTTTTCAAAAATTCCTGTAACGAGACATGGCTCATAAATCACTCCTGTTATGGTTTT
TCAAGCGCAATTGCTGGCGCATTAAGTACCTGAATCAGTTCATTAAGAGACTGCAAAATGTTGCTTGCCC
AGAAACGACCTTCATTGGTCAACCGCAGACACGTTGACGCATCGCGGCTTAAGCCTTTTTGGTGCCACTG
GGCCAGTAACGGCGCGAGTTTTTCGGCATGTGGCGTAAGTTCGTCCAGCGGTACACGCGCCGTTTCAATG
CCCGACTGCAAGGTATGACGCCACTGCGCGTTACGTTCGGCGTTACGCATGATCATCATCAGCGGTTTTT
TGCCTGCTGCGACGGATTCATGCCAGGTCTGAAGATTGCGTTCGTTCATCCAGGAGTAACCATTAATCGA
ACCGCCGGCTCCGGAACCAAAGGCCAGACAATCGGCACCTTGTTTAATCAGCAGGTTATAGAGATTGCGT
TCGCGTGTGGTACGGCCCCAGTGGCTGTTACTGATGCAGCGCCAACCGGCATCGTCCATAAAATCACACC
CTTGCAGGTAAAGATCGCGACGTTCTGCCGGAGAGGGCACGGTAGTACGCCCATTTTCCACGGCTTTGCC
CAGCGGTGTATTGGGCAGGACATTGAGCGCATAGAGATCGACGCCGTCGAGACCGATATCGCGGGCAATA
GCCAGATCTTCTCCCCAGGTTTGCGCATCCTGACCCGGCAGACCAAACAGCAGGTCACAGACCACCGCGG
CACGATCGCGTTTGACCAGGCTTTCCATAAACGCAATAGCGGTTGGGCCATCCGAGGTGCGGGCCATTTT
CTTGCGGATTTTGCTGTTAAACGACTGAATACCAATTGAGAAGCGGTTTGCTCCTGCATCAAGGCAAGCA
TCGATTCGCTCAGCGTCAAAATTCAGTACCCGGCCTTCAATAGTGATTTCACAATCAGGGGCCAGTGGCA
GCTTTTCTCGTAATGTGGTGATGATTCTGGCCAAATCGTGTGCTGAAAGCGCGGAAGGCGTACCGCCACC
GAAATAGACCGCGTGGATGGGGGCAGACTGATGCAATACGCTGTCTGCTTCCAGTTCTATTTCACGAATC
AGGGCGTCGGTATAATGAGCACACGCATCTTCATTAAAACGGTTCTGATAAAAACCACAAAACGTGCAGT
GTGTCGCACAAAAAGGAATGTGTAGGTAAACCAGTCGCTTACGTGGTGATACCGTTTGATTGATCATCTC
TTGCCAGGTCTGTGCCAGTTGCTCTTTGGCAACCGGAATGGCCCCACGAAACGGCATCATGGCGCGCCTG
TCTTTAAATGGCTGATCACCGTCTAAAGCAAAATGTGGCGTGAGATCCAGGGTGTTATTTGTGTTCATTC
GTCTGATTTAAATCCATTTATTGCGGCCAAAGCTGCTGGTGTAAAGACTCAACGACATCAGCAATACGCG
GACCCATTCCCAGAATCAGGTTTTGATCAACGGTGATAATGCGCTGGTTTTTCCAGGCGGCAGTGTGGGT
AATTCCGGCAATAGAACGTAGCCGATTAATATCGCCATCGACCATTTGTGAGGTGACGACAATCACTTCA
GGGTTAGCCGCAATCAGCGATTCCGCGCTGTAGCTTTTGTACTGCTGGTGGGTAGCGACGTTTTCTGCTC
CGGCAAGCGAAAGAATGGCGTCCGCGACGCTGCCTTTACCGGCAACCTGTGGCGCACTTCCGCCTGCGGA
GAGAATAAACATGGCTTTAACCGGGGCTTTTTTGGCCGTCACGTTTTGCTGTACTCGCTCCAGGCGTTGG
TTGATCTGTGTCACCAGCGCCTCGCCTTGTTCAGGAACCTGTAACGTTTTTGCCAGTTGGCGAATGTTGG
CGTACATCTGCTCAAGGGTGGCTGGTACACGCGGCAGAGTGACGACGTTGACTTTTTGCGCCCGCAGTTG
GTCGAGCACAATTTGCGGTCCTGCATCCTGCCAGGTAATTACGCTATCCGGGCGAAGTGACAAAATGCCT
TCGCTGCTGAGTTGTTTCCAGTAACCAATATGCGGCAGTTTGGCGGTTTCTGGTGGATAAGATGTCGTTT
CATCGACACCAACCACGCGTTTGCCAGCGCCCATCGCGTAGATTAGCTCCGTCAGCGATCCTCCTGCGAC
CACGATACGTTCGGCAGCCGTTACGCTAAAAGTCCAGCTAAAAGCCAGTAATGCCGTAAACAATTTTTTT
CGTTTTACCATGGTCTTCGCGGCAGAGGCCACGGCTGAAATACATAACGTTAGTGGGGAAAAAAGAAACG
GCCTGGTGATGATCCTTGGCATAATGTGAGAACTCTTATCAAATTGAGAATGATTATGATTATCATTTGA
GTTATATATGAAATACAACCGTCGATTCAATACGCACGGCGTTACAAGCGTATTTATTTTTGATTTTTAT
CAAGATGCTTCGTCAGCTAATGTTCTTGTTACCGATTAAATTTCAGCGCGGGAAAAAGCTGAGAACCCGG
AGATATCGCGGCTTGCAGAGCAAAGAGAAGAGAAAATTATCACTGTTAACGACAACGTTTTGTGATGAGG
TTGTGGGGGGATAGCCATAAACACAGGATGGTTTTCTGGATGCTGGATAGATTTCATAACCCCCTGTTTA
TTGCGTTAATGGCGGTTAAAAAAAGCTTGATCATAAAAAATTGATCGATAATAATTCTCATTATCACGTT
TGAGTTTAACAAAATATGACATCATGGATAACAAAATCATATCTTTTGTAAGGGAAAACGCACAGCACTC
TTCACTTCAGACGTGGCGTACTACTTTGCCTGACAAAGAGGGCGTGCTTTTGCTGAATTATCAGAAATAT
TCGGCAATTTTACGGGATATATACGCTAATAGCTTCCCGTGGTGATATCTAATCATTTGAATTGTAAATA
AATTTATTTTTCGCCAGCCACCCCGGTATTAACCCAGGCAGCCAGCATTTTTTATTTTCCTCATGGAGAA
TCGCTATGTCACGTCCGCAATTTACCTCGTTGCGTTTGAGTTTGTTGGCTTTGGCTGTTTCTGCCACCTT
GCCAACGTTTGCTTTTGCTACTGAAACCATGACCGTTACGGCAACGGGGAATGCACGTAGTTCCTTCGAA
GCGCCTATGATGGTCAGCGTTATCGACACTTCCGCTCCTGAAAATCAAACGGCTACTTCAGCCACTGATT
TGCTGCGTCATGTTCCTGGAATTACTCTTGATGGTACCGGACGAACCAACGGTCAGGATGTAAATATGCG
TGGCTATGATCATCGCGGCGTGCTGGTTCTTGTCGATGGTGTTCGCCAGGGAACGGATACCGGACACCTG
AATGGTACTTTTCTTGATCCGGCGCTGATCAAGCGTGTTGAGATTGTTCGCGGACCTTCAGCATTACTGT
ATGGCAGTGGCGCGCTGGGTGGGGTGATCTCCTACGATACGGTCGATGCAAAAGATTTATTGCAGGAAGG
ACAAAGTAGTGGTTTTAGTGTCTTTGGTACTGGCGGCACGGGGGACCATAGCCTGGGATTAGGCGCGAGC
GCGTTTGGGCGAACTGAAAATCTGGATGGTATTGTGGCCTGGTCCAGTCGCGATCGGGGTGATTTACGCC
AGAGCAATGGTGAAACCGCGCCGAATGACGAGTCCATTAATAACATGCTGGCGAAAGGGACCTGGCAAAT
TGATTCAGCCCAGTCTCTGAGCGGTTTAGTGCGTTACTACAACAACGACGCGCGTGAACCAAAAAATCCG
CAGACCGTTGAAGCTTCTGATAGCAGCAACCCGATGGTCGATCGTTCAACAATTCAACGCGATGCGCAGC
TTTCTTATAAACTCGCCCCGCAGGGTAACGACTGGTTAAATGCAGATGCAAAAATTTACTGGTCGGAAGT
CCGTATTAATGCGCAAAACACGGGGAGTTCAGGCGAGTATCGTGAACAGATAACAAAAGGAGCAAGGCTG
GAGAACCGTTCCACTCTATTTGCCGACAGTTTCGCTTCTCACTTACTGACATATGGCGGTGAGTATTATC
GTCAGGAACAACATCCGGGTGGCGCGACGACGGGCTTCCCGCAAGCAAAAATCGATTTTAGCTCTGGCTG
GCTACAAGATGAGATCACCTTACGCGATCTGCCGATTACCCTGCTTGGCGGAACCCGCTATGACAGTTAT
CGCGGTAGCAGCGACGGCTACAAAGATGTTGATGCCGACAAATGGTCATCTCGTGCGGGGATGACTATCA
ACCCGACCAACTGGCTGATGTTATTTGGCTCATATGCTCAGGCATTCCGCGCCCCGACGATGGGCGAAAT
GTATAACGATTCTAAACACTTCTCGATTGGTCGCTTCTATACCAACTATTGGGTGCCAAACCCGAACTTA
CGTCCGGAAACTAACGAAACTCAGGAGTACGGTTTTGGGCTGCGTTTTGATGACCTGATGTTGTCCAATG
ATGCTCTGGAATTTAAAGCCAGCTACTTTGATACCAAAGCGAAAGATTATATCTCCACGACCGTCGATTT
CGCGGCGGCGACAACTATGTCGTATAACGTCCCGAACGCCAAAATCTGGGGCTGGGATGTGATGACGAAA
TATACCACTGATCTGTTTAGCCTTGATGTGGCCTATAACCGTACCCGCGGCAAAGACACCGATACCGGGG
AATATATCTCCAGCATTAACCCGGATACCGTTACCAGTACCCTGAATATTCCGATCGCTCACAGTGGCTT
CTCTGTTGGTTGGGTCGGTACGTTTGCCGATCGCTCAACACATATCAGCAGCAGCTACAGCAAACAACCT
GGCTATGGTGTGAATGATTTCTACGTCAGTTATCAAGGGCAGCAGGCGCTCAAAGGCATGACCACTACTC
TGGTATTGGGCAACGCCTTCGATAAAGAGTACTGGTCGCCGCAAGGCATCCCACAGGATGGTCGTAACGG
AAAAATTTTCGTGAGTTATCAATGGTAATCATCTGCCCCGATATTTCGGGGCATTTATCTGGAAGGAAGA
GAGACAATGAACCACTACACACGCTGGCTTGAGTTAAAAGAACAAAATCCCGGAAAGTACGCGCGTGACA
TCGCAGGTTTAATGAATATCAGCGAAGCAGAACTGGCATTTGCACGCGTCACGCACGACGCGTGGCGGAT
GCGCGGCGATATTCGTGAAATTCTGGCGGCGCTGGAAAGCGTTGGTGAAACCAAATGTATTTGTCGTAAT
GAATATGCAGTCCATGAGCAAGTTGGCTCGTTCACAAACCAGCATTTGAACGGACATGCCGGATTGATCC
TCAATCCGCGCGCGCTGGATTTACGTCTGTTTCTCAATCAATGGGCCAGTGTTTTCCACATCAAAGAAAA
CACGGCTCGTGGCGAACGCCAGAGTATTCAGTTCTTTGATCATCAGGGCGATGCATTACTAAAAGTTTAT
GCCACCGACAATACCGATATGGCGGCATGGAGTGAGCTTCTGGCACGGTTTATCACCGATGAGAATACGC
CGCTTGAGTTAAAAGCCGTTGATGCGCCAGTTGTTCAAACGCGAGCCGATGCCAGTGTGGTCGAGCAAGA
GTGGCGGGCGATGACCGACGTTCATCAGTTTTTTACGTTGCTCAAGCGCCACAACCTGACGCGCCAACAG
GCGTTCAATCTGGTGGCAGACGATTTGGCCTGCAAAGTATCCAACAGTGCGTTGGCGCAAATTCTTGAAT
CTGCACAGCAGGATGGCAATGAAATCATGGTGTTTGTTGGCAACCGTGGCTGCGTACAGATTTTCACCGG
TGTGGTAGAAAAAGTGGTGCCAATGAAAGGTTGGCTGAATATTTTCAACCCGACGTTTACCCTTCATCTA
TTAGAAGAGAGCATTGCTGAAGCCTGGGTTACCCGTAAACCGACCAGCGATGGTCACGTAACCAGTCTGG
AATTGTTTGCCCATGATGGTACGCAGATAGCGCAACTTTATGGTCAACGTACAGAAGGTGAACAGGAGCA
AGCGCAATGGCGTAAGCAAATTGCTTCGTTGATACCGGAAGGCGTTACTGCATAACGTATAATTAACGGG
AGGTCTGGCTGTTGCTGGGCCTCTTTATATTGTTCAATCGTTCACACCAGATAATTAATATGCTGATGGC
GTACCAGCTCATTGATCCGCTTAAGATTGAGGATCATCATGATATTGTGTTTATGGCAGTAGAACGTTTT
TAGCGATATTTTCAGTTTCTCCAGAATATCTTCCGTTGTCATTTGATTCGCAATGCAGCTCAGAACCTGA
TGCTGCTTGCGCGAGAGGGACACATCCGCTTCAGGCACAGAGCAGTAACTGCCATTGATGAGTGCGACAA
AATCGATGATGGCGATAGTTCGCGGAACAAAGGTCACCGGTACTTTCCCCAGGCAGCGTTTAATATTAAA
GGGGGAGAAAATAATTACATGGACAGGTTTTAATCGTTCAATTTGAGTGAGAAAATTAGAATGAAATACA
TTATTCATTAATGTATCAATAATGACGAAGGCATTCTGATGCAACATTACGTCGATCTCTTCTTCGTTCT
GTATATGAACGACATTACCTTTACTCAGAATGTTTTTCATCGCGGTGAAAAACATCGTATCCCTGGTAAT
TATAAGAAACATAACCGACTCCTGGTACGTACATTAACTTTATAATAAGTTTGCCAAAGGTAATTAACAG
GACAGGGCTTATAATAATAGTTAGCTTACTGTGTATTAATTTGATGTAATGCATGATGCAGATACTGAGA
AAGCATCTGCATCTTTCGGTGGTGTTATTTGACCAGCTCAGGTGTTACCTGACTCACCGCATTGGTGTAG
TAAGGAGCCCCCCAGCCCGGTTCCGGCCAGAATGCACCATAGCCGTAATCCCACAAGTTATAGGTGGTAT
TAACCACTTCTCTCAAATGCCACACCTGGATGCCCTGCATATTCACTTCCAGGAAGTTATACGGGACTTT
ATTGATAAAGCCAGGTTGTTCACCCTGAATGGTACCGAGGATGGTAACAAAGTGATTACGATAGTTCACT
GGATCAAGGAAGCCGCTTTGTCTGGCGAGCAGTCGGCCCTGATAGTTGGCTTCAATATCAGGCTTCGCAT
AGCTATCCAACGGTAATACAGCGATTTCTAACAACGTATCCGTTTTGCCATTGATAACGTTGATAACCTT
CCCGCCAAAGCGCGCTTGTTGACCAACATATAACCCCGGCTGGTTATGAACAGCAACAAAACTTTTTTGA
ATATCAGGTTGGTTATTGCCTTTGATATTTTGCGGAATTGAACTACATGCGGCAAGCAAAAATGAAAGGC
TGAGGATGAGTGCACCTTTTGTCATGTTCATGTTACTATCCTTATCAACAAATATTAAAACCATAATAGA
TATTTCTTTATAGTTTTCATCTGATTCTGAGGCGATATGCCTGATAGTAACGTAAACCTGTCTGATGTTT
ATATCTCTTCTGTTTAGTTGAGCTCAGTTAATTTTTGGGCGTGGCATGAGTATCCATTGTTCCATAATCT
ATATTCAGAGGTTTTTAATCTTTTCGTGTCTAATGTTATTTATCTGATTAAGTATTGATTGTGTCTTTTG
CGGAAGTGGTGTCGAGCTTATCGTTTCAATGTTATTAATAAGACTTACAAGTTGAGCCTCAACTTTGAGT
AGTCTGCATTTGTATATGTGGTGTTCGTATGGCACGCATTAATTTGTTGGCGTTGTTGCGCTAAATCAAA
TTGTTCAGAGGTGTATCCATTCTCCAGAGAATGGGGCATTCATGGGGTGTTGTTCTTCCCGGTTATCACA
AGGCCACTTCGGTGTGTCTGGCGTTTTAACATTATCGGTATTTGTTGTGCAGTTATAAATATCACCGTTA
TATGTATTTATTACACCTGGGGTAAAGTCAATTGACATAACATTCCTTATTCATCATTTGTTTTATGCTA
AGATTTTTAAATTGGATAATTAGAACAGGAATGGATTTTCTTCTACATACAGTAAATATAATGCGTCATA
TCTTCCTGATATAATTACCTTTGACTTCTCTTTTATTTCCATCTGGTAATATTTGAGTGCAAAAAAAGGC
AATAATAATATCGCAAAAGAAAACGTTAACAACTATCGAAAATGCTCGTTTTAAAAAGGTATGATGTTCT
CTGATAGTGTGTGAAGTGATATTTTTGTGATGTTTTAGATATGTAATAATAAAATAGGTTAACGTATGTT
GAAATTATTTATTGTGTAAACCACTGATAGATCATAATCCAGTACATCTTTAAACTGCTGCACTGTATCG
CTGATAACTAAGCAGCTCACTGATACACCATGCTGGACGCGATAATTGGAATCTCACGCAGGGAGTACTG
TGTAAATAGCAAAATCGCCTGATGCGCTACGACTGTCAGGCCTACAAATAACATACAATTCATCGAATTA
TCATAACTTTGTAGGTCGGATAAAACGCGCCAGCGTCGCATCCGACATAAATAAAGCGCATTTTTCTAAC
AACCTGTGGGGGAATATAGCCGCTTTATTTCAGGCGATTACCCGCCTCATCAACCACTTTCTCGCCATCT
TCCTTGGTGAACGCGCCTTTTTGCGCATCTGGCAGAATTTCCAGCACGACTTCTGAAGGGCGGCACAGGC
GAGTTCCCTGTGGCGTCACCACAATCGGGCGATTAATCAGAATCGGGTGCTGAAGCATAAAGTCGATTAA
CTGATCGTGAGTAAATTTATCTTCTGCAAGGCCCAGTTTCTCATACGGCTCGACGTTTTTACGCAGCAAC
GCGCGTACGGTAATCCCCATATCGGCAATGAGTTTTACCAGCTCATCGCGCGTCGGTGGTGTTTCCAGAT
AATAGATAATGGTCGGTTCTGTACCGCTGTTGCGGATCATCTCCAGCGTATTACGCGACGTACCGCAGGC
CGGGTTGTGATAAATGGTAATGTTGCTCATATCAGTATCTCATTACGATGTGAAAGAGAGGTGTAGCGCC
AGCGCCACCAGCGTTACAAACCAAAGCGGACAAGTCAAAAACACATATGGTTTAACGAATATGTAAGTGT
AGAGAAAGGTGTAGGTGTGAATTAAGCGTTGGGCATTCATTTGAAAGGAGGTCTGAATCAGGACGTAAAA
AAACCGACTTCGCGTCGGTTTTTTTACTGTTCAGCCCTGAGTTGGTGGCTCTGGCTGGAGTGAGATAGCC
ATCATCTAACGCATCAATGCTAATACCATACTGAAACTATTGCAAGGACATGCTGGTTTTATAACCCGCA
AGTACTGTATGATTATCCAGTTGGTTCTGAGACATTTTCACTCTGGCAATGCGCATAAACGCTTTCAAAG
TCCTGGTCTGAAGTACGGGTGGTGCCGTTAACTGATGCTCTGGCCGGAGTGAGATAGTCGTCATCTAACA
ATGAGACATGCGCCGTGACAGGCAATGGATGAGTAAGCGGATGCATTCTCACTCCATCGCATGGAGAAAA
CGGGTGATTGATAAAGCAATCATCGTTCTTGGGGCGTTAATTGCGCTGCTGGAACTGATCCGCTTTCTGC
TTCAGCTTCTGAACTGATAGCGGAAACGTAGCTAAGGGCTAAGAGCACACTACTCTTAGCCCTTTAACAT
TTAACGCATTGTCACGAACTCTTCTGCCGCTGTCGGGTGAATGGCAACCGTGTTGTCGAAGTCTTTTTTG
GTTGCACCCATCTTCAGCGCCACCGCGAAGCCCTGCAACATTTCGTCCATACCAAAACCAATGCCGTGAA
TACCGACAATCTTCTCTTCCGGTCCAACGCATACCAGTTTCATGCGGCACGGCTGGCGGTGAGTGGTGAC
GGCGGTATACATCGCGGTGAAAGAGGATTTATACACTTTCACCTGATCGTCGCCGTACTGCTCGCGCGCC
TGCGGCTCCGTTAAACCAACAGTACCAATCGGCGGATGGCTGAAGACCACGGTCGGAATGTCGCTGTAAT
CCAGATGCTCATCCGGCTTGTTATTAAACAGGCGTTCAGAGAGACGGCGACCTGCTGCAACAGCCACCGG
TGTCAGTTCCACTGCACCCGTGTTATCGCCCACCGCGTAAATACCTTCAACGTTGGTGTTTTGATATTTA
TCGACGACGATATAGCCTTTTTCGTTGGTTTTAACGCCAGCAGCTTCCAGGTTGATGTTGTCATTGGCAG
GCTCGCGACCAATCGCCCAAATCAGGCAATCCACCGTTTCACTGCGACCATCTTCCAGCTCCAGCGTCAG
GCTACCATCGGCATTTTTCACTACCGCTTTCGGGATGGCGTTGGTATGCAACTGTGGGCCTTCAGCGTTC
ATCACTTCAACCAGCGTTTCAGAGATCATCGGGTCGAAGCTGCGCAGCGGCGCATGTTTACGCACAAACA
GATGCGTCTTCGCACCGAGGCCGTTAATCACGCCCGCCAGTTCAACGGCGATGTAACCCGCGCCAACAAC
CGCTACACGCTCTGGCAAAGCCGGAAGGGCGAAGAAGCCATCAGAATCAATACCGTATTCCACGCCCGGA
ATATCCGGGTGGCTCGGACGACCACCGGTGGCGATCAGAATATGATCGGCCGTGATGGTTTCGCCGTTGA
CTTCAATGGTTTTGGCATCAACGAAGCGGGCAAAGCCTTTGATTACATCAACGTTATTTTTACCGAGCAC
GTTCTCATAGGAAGTATGAATACGGTCGATATAGGCGGTACGGCTGGCGATCAACGTTTCCCAGTTGAAT
TTATTGATAGTGGTATCAAAACCATAATCCGGGCCGTACATATGGATCGCTTCACGGATTTGCGCCGCGT
GCCACATCACTTTTTTCGGCACACAGCCAACATTTACGCAGGTGCCGCCCAGCTCTTTGGCTTCAATCAG
TGCGCATTTCTGGCCGTACATAGCCGCGCGGTTGATGGAGGCGATACCGCCGCTGCCGCCGCCGATGGCG
ATGTAATCATAGTGTTTAGTCATGACATATTGTCCTTATCGTTGATTACCGCGATTGTAGCGCGAGACGT
AATAGGTGCCAGCAATGGCTGCAATTACTCTGGCACGATCCAGCTTACGGTGGCGTGCCCGGTGCCTGCC
GGAACCAGTTTGCTGTGCAGCCACGGCAGCACGTTATTCATCTGCTGTTCCAGCTTCCACGGCGGGTTAA
TCACAATCATGCCGGAAGCGGTCATGCCACGGCGATCGCTGTCTGGCAGCACCGCCAGTTCAATTTGCAG
AATTTTGCGAATGCCGGTCGCTTCCAGTTCGTGGATCATGCGCTTAATTTGCTGGCGCAGCACCACTGGA
TACCACAATGCGTAAGTGCCAGTGGCGAAACGTTTGTAACCTTCTGCTATCCCGCTGACCACCGCCTGAT
AGTCGGTTTTCATTTCATACGGCGGGTCGATAAGGATTAAACCACGGCGGGAAACCGGCGGCAGCTTGGC
CTTAAGCTGCTGGAAACCGTCGGCTTTTTCGACGCGCGCACGGCTGTCTTTCTGAAATTCAGAACGCAGC
AACGGGTAATCGCTCGGGTGCAGTTCGGTCAGTTGCAGGCTGTCCTGTTCACGCAGTAGCTGGCGAGCAA
TCAACGGCGAACCGGGGTAATAACGCAACTGCCCGCTACGGTTGAAGTGTTTTACCACATTGATGTACGC
CTCCAGCTCCGCAGGCAAATCGTCCTGCTGCCAGATACGGGCGATACCTTCAAGATATTCGCCGGTACGC
TCGGCATGTTCGCTGCCTAACTGATAACGCCCGGCCCCTGCGTGGGTGTCGAGATAGAGAAACGGTTTAT
CTTTCTCTTTCAGCGACTCGATGATCAGGCTCTGAACGGTATGTTTAAGGACGTCGGCGTGGTTGCCAGC
GTGAAAGCTGTGGCGATAACTGAGCATGGGTAAAGGTGTTCCGGTAAGTAAAAATCGGCCCGTATTCGGG
GCGCACAAAAGCCTATCAGGACAGTATACCGAAAAGAGGCCGCCGCCGCGAAAGCGTAACGTTTCTCATT
GAAATTCACTACACTTAACCCCATGCTACAAACATTATGTAAAGCGCCTGTTGAGCGCTTCCTTAACCTC
TTTAACCAGGACTGCGCTAATGACGAATCCGTTACTGACTCCCTTTGAATTGCCTCCGTTTTCTAAAATT
CTCCCGGAACATGTCGTTCCAGCCGTGACTAAGGCGCTGAACGACTGCCGCGAAAATGTGGAGCGCGTAG
TAGCGCAAGGGGCACCGTACACCTGGGAAAATCTCTGCCAGCCGTTGGCGGAAGTGGACGATGTGCTGGG
GCGTATCTTCTCCCCGGTCAGCCATCTGAACTCGGTGAAAAATAGCCCGGAGCTGCGTGAAGCGTATGAA
CAAACCCTGCCGCTGCTGTCAGAATACAGCACCTGGGTAGGGCAACATGAAGGGCTGTATAAGGCATATC
GCGACCTGCGCGATGGCGATCATTACGCCACGCTGAACACGGCGCAGAAAAAAGCGGTTGATAACGCACT
GCGCGACTTCGAACTCTCTGGCATCGGTCTGCCGAAAGAGAAACAGCAGCGTTACGGCGAAATTGCTACC
CGTCTTTCTGAACTGGGCAACCAGTACAGCAACAACGTCCTCGATGCGACGATGGGCTGGACCAAACTCG
TTACCGACGAAGCGGAGCTGGCGGGGATGCCAGAAAGCGCGCTGGCTGCGGCAAAAGCCCAGGCCGAAGC
GAAAGAGCTGGAAGGTTATTTGCTGACGCTGGATATCCCAAGCTACCTGCCGGTAATGACCTACTGCGAC
AACCAGGCCCTGCGTGAAGAGATGTATCGCGCTTATAGCACTCGTGCTTCCGATCAAGGTCCGAACGCCG
GTAAGTGGGACAACAGCAAGGTGATGGAAGAGATCCTCGCGCTGCGTCACGAACTGGCGCAACTGCTGGG
CTTTGAAAACTACGCCTTCAAATCACTTGCCACTAAAATGGCAGAAAACCCGCAGCAGGTGCTGGATTTC
TTAACCGATCTGGCAAAACGCGCGCGCCCGCAAGGCGAAAAAGAGCTGGCGCAACTGCGCGCCTTCGCCA
AAGCCGAATTTGGCGTCGATGAGTTACAACCGTGGGATATCGCTTACTACAGCGAAAAACAGAAACAGCA
CCTCTACAGCATCAGCGATGAACAACTGCGTCCGTACTTCCCGGAAAACAAAGCGGTTAACGGCCTGTTT
GAAGTGGTGAAACGTATTTACGGCATCACCGCTAAAGAGCGTAAAGATGTTGATGTCTGGCATCCGGATG
TACGTTTCTTCGAGCTGTATGACGAGAACGACGAACTGCGCGGCAGCTTCTACCTCGACCTGTATGCCCG
TGAAAACAAACGCGGCGGGGCGTGGATGGATGACTGCGTAGGCCAGATGCGTAAAGCCGACGGTTCGCTG
CAAAAACCGGTCGCGTATCTGACCTGCAACTTCAACCGCCCGGTAAATGGTAAACCGGCGCTGTTTACCC
ATGACGAAGTGATCACCCTGTTCCACGAGTTCGGTCACGGCCTGCACCATATGCTGACCCGCATTGAAAC
CGCTGGTGTTTCCGGGATCAGTGGGGTGCCGTGGGATGCGGTCGAACTGCCGAGCCAGTTTATGGAAAAC
TGGTGCTGGGAGCCGGAGGCGCTGGCGTTTATCTCCGGTCACTATGAAACCGGCGAGCCGCTGCCGAAGG
AGCTGCTGGATAAAATGCTGGCAGCGAAAAATTACCAGGCGGCGCTGTTTATTCTGCGCCAGCTGGAGTT
CGGCCTGTTCGATTTCCGCCTCCATGCCGAGTTCCGTCCGGATCAGGGGGCGAAAATCCTCGAAACTCTG
GCAGAAATCAAGAAACTGGTTGCCGTAGTACCGTCTCCGTCATGGGGCCGTTTCCCGCATGCTTTCAGCC
ACATTTTTGCCGGTGGTTATGCGGCAGGTTACTACAGCTACCTGTGGGCCGATGTGCTGGCAGCAGATGC
CTTCTCGCGTTTTGAGGAAGAGGGCATTTTCAACCGTGAAACTGGGCAGTCGTTCCTCGACAACATTCTG
AGCCGTGGCGGTTCAGAAGAGCCGATGGAGCTGTTCAAACGCTTCCGTGGTCGTGAACCACAGCTGGATG
CGATGCTGGAGCATTACGGCATTAAGGGCTGAACATTCAGTGAAAATCTGCTTAATTGATGAAACAGGCG
CCGGAGACGGCGCCTTATCTGTTCTGGCGGCCCGCTGGGGGCTGGAACACGATGAAGACAACCTGATGGC
GCTGGTGTTAACGCCGGAGCATCTGGAACTGCGCAAGCGTGATGAGCCGAAACTTGGCGGCATCTTTGTT
GATTTTGTTGGCGGGGCGATGGCGCACCGACGCAAATTCGGCGGTGGTCGCGGAGAGGCGGTGGCGAAAG
CGGTGGGCATTAAAGGCGATTATTTGCCGGATGTGGTGGACGCCACCGCAGGGCTGGGGCGCGATGCCTT
TGTGCTGGCTTCAGCCGGCTGCCGCGTGCGGATGCTGGAGCGTAATCCAGTCGTTGCCGCATTGCTCGAC
GACGGCCTGGCGCGTGGTTATGCGGATGCGGAAATCGGCGGCTGGTTGCAGGAGCGGTTGCAGTTAATTC
ACGCTTCCAGCCTGACGGCGCTGAGCGATATCACCCCGCGTCCGCAGGTAGTTTATCTTGACCCAATGTT
CCCGCATAAGCAGAAAAGCGCGCTGGTGAAAAAAGAGATGCGCGTGTTTCAGTCGCTGGTGGGGCCGGAT
CTTGATGCCGATGGATTACTGGAGCCTGCACGCTTGCTGGCGACCAAACGCGTTGTGGTAAAGCGCCCGA
ACTACGCGCCGCCGCTGGCGAATGTCGCCACGCCAAACGCGGTAGTGACCAAAGGGCATCGCTTTGATAT
TTATGCCGGAACGCCGGTGTAAAAGTAAAGCAGGGTAGCGTTATCGCTACCCTGCTTTCTGCAAGAATAA
TTAATGGCTTTCGGGCGTCGCAATCATTCGTTTCAGCCACGGCACCATCAGCAGCATCACCACCGCAACG
CCCAGCGTAACCAGGCCAATCTTACCAAACACGTTGGTATAGACGGGCAACGTCTCAAGTGGATCGGTAA
TGTTGTCTGGTACTGCGGTAAATGTTGCCACATAGCCGCCCAGCAAGAACGCGGCAGCCTGCGTCAGGAA
CCACATCCCGAGAATAAAGCCCATCAAATGCTGCGGCACCAGGGCAGCAATCATCGCCAGGCCAAGGGCG
CTAATAAACAGTTCACCTAAGCTCTGGAATAAGTACACCAGCACGATAAACCATGGCGATGTCAGCCCCT
GGGCATCCGCAAACCACATTCCAGCCGCTGCAGCCGTCAAAAAGCCCAGTGAGCACATAAACATGCCGAG
AGTAAACTTCATCGGCATCGAGAGATCTTTGCCTTTGTTACCCAGATGCGTGTAAATGCCTGCCAGTATT
GGGCTGGCGAGTACCACCCAGAACGGGTTAAGCGCCTGGAAGCTGACCGGGTTGATGGAAAAGCCGAGAA
TTTCATGATGCACGTTGTTGATGGCAAAGAAGTTCAGCGACGTTGGCATCTGGGCGTAGAGAATGTAAAA
CACCACCGCTTCGAGCATCAGGACAAAGGCGACAAACATTTTATTGCGCCCGGTTTTATCCAGCTTGAAT
GCCTGACGAAAGAAAATGATGGTGACGACGATGGAGAGAACAATCAGCACCAGATTGGCGACTTCTACGT
TGTGCATCAGCCATGCACAGACGAAGATCATCACCACGCTGCCAAGTAACACGTACAACAGTTTACTGAA
GCTCATCGGGCAGAAGTCGGGTTCAGAACCAATATCTTTCACCATTCCGCGACAGGCGATGTAAACCAAT
AGCGCGATAATTAATCCCGCACCGCACAGGTTGTAGGTGACTGAATAGCCGAATTTATCAGCGATCACAG
GGGCCAGCGATAACGCTATCAACGAGCCGATGTTGATCGACATATAGAACAGGGTAAATGCGCCATCAAG
CCGCGGATCTTTCGGCGGATAGCACTTCGAAAGCAAGCTGGCTGGGTTAGCTTTAAACAGGCCGTTACCG
ACAGCGATAGTCCCCAGGGCGATGAAAATCAGGTCAGGCTTAAGTAGCGACAGGCCGGTCATGAAGTAGC
CAATCGCCAGCACAAGTGCTCCGAGAACAATGGTGCGTTTGGTTCCCAGCAGGTGGTCGCCAACATAGCC
ACCAATGGAAATGAGGCCATAGACCAGCGCAGCAAAAGCACCAAAAGTGACAAAAGCCTGCTCTTGCGAG
AACCCAAGCTGTTTAACGAAGAAAACCGCCAGTACGCCCTGCACGCCGTAGTAGCCGAATCGCTCCCATA
ACTCGACAAAAAAGATCATGAAAAATGGGCGAGGTTGCTGCAGCATCCCCATGGGTGTTGTTGTATTCAT
ATTTATTAACCTTCCAATACCATCCTGAAAAGTATGAACGCGTAAGGGATAACGCGCGAAAAAGTTTACA
TCTGTCAGAGATTCTTAATATTGATGCGGCGAATAGATTAATACACTATTACAACAGAAAATAACCAGCT
GATCACACTAATGATAGAAAATATAATGGTGTTAAATGTTGTATTGGCAGGGGTTTTGATTGCGTACGCA
GACCGCAGGCCAGATAAGGCGTTTACGCTGCATCAGGTAACAAGGCGCGCCAAAAAGCAAAACGCCCGCA
TATGCGGGCGTTCAGGAACACGTCGTGGAGGGAAGATTATTCTTCTTCGTCGCGCAGCGGAACAATCAGC
ATATCAACGTGAACGGTGTTGATCAGCTGACGTGCGGAAGACATCAGTTTGCTCCAGAAGTCCTGGTGGT
GACCACAAACCACCAGATCCATATCGTATTTCTTGATTGCATCGACCAGTACCTGGCCCAGATCGCCGCT
GCCGCTCAGGGTTTCAGTGATTGGGTAGCCTGCATTGGTTGAAAGCTCGGTCAGTGCATGATGTGTCTCT
TCAGAGATGCGTTTCTGCATATCACCCAGATTCACATCGATAAGCCCGGTGTATAGGTCAGAGTAGTTTA
CATCTACGTGGATCAGAGAAACTTTCGCATTGTAGGGGCGAGCCATAGAGACTGCTTTCTCTACCAGAAC
TTTGCTTTCCGGGGAGAGGTCGACCGCGATGAGAATGTGTTTATAAGCCATAGTGTTACTCCTTCCATAA
AGTTGTCGATGACTGGCCAGCTAGCGTTTCTTGTGCCGTTACGTCACCCGCGTCCTGCGAACTACGTGCG
CGGGGCTAACCCAGCCGTAAAGATTCAGTGTTAAGACCATCCTTACCTTATAGCGACCCGGATGATCCGT
CAATCCGCCTTGCTTACTCGTTAGATAAACAAATTTTCGACATGAATATATTGATAGTGGTTAACCTTCT
GGAAAAAAAACAACCTGATCTCCTACACTATCTATAGAGCCGCTCGGATGTTGGTCACCACAAAAGCGGT
TTCTCCAGGACCTGGTGTTAACTGATTGGCAGCGTATCGGGAGCGGTAGCCCCGGGGTGGAACTCCGCGG
GCAGGTCGCCGGGGAGGAGGTATGATAAGCACCGTCGCATTATTTTGGGCTTTATGTGTCGTTTGCATTG
TTAACATGGCGCGCTATTTCTCATCACTACGCGCGTTGTTAGTGGTACTGCGTAACTGCGATCCATTGCT
CTATCAATATGTTGATGGAGGGGGCTTTTTTACCTCACATGGCCAACCCAACAAACAGGTGCGTCTCGTT
TGGTATATCTATGCCCAACGTTATCGCGATCATCACGATGATGAGTTTATTCGCCGCTGTGAGCGGGTGC
GTCGGCAGTTTATTCTGACCAGCGCATTGTGTGGTCTGGTGGTGGTCAGCCTGATTGCATTGATGATTTG
GCATTAAGCACTTCAGCAATAATGACGCATAAAAAAAGCGGGCCAGTAAACTGACCCGCTCGTTTTGGTG
CGTACGATTACAGGAACTGCAAGGAGAGCCAGTACAGCCCGCCGGAAAGCAGTACCGCAGCCGGAAGGGT
AAATACCCAGGCCATCAGAATACTGGTTACGGTTTTACGCTGTAAGCCGCCGCCATCTACCACCATCGTC
CCCGCGACAGAAGAGGAGAGTACGTGAGTAGTGGAAACCGGCATCCCGGTATAACTTGCCAGGCCGATAG
ACACTGCCGCCGTCATCTGGGCAGACATCCCCTGAGCGTAGGTCATGCCTTTCTTACCGATTTTCTCACC
GATAGTCGTTGCCACACGACGCCAGCCAATCATCGTACCGATACCTAACGCCAGCGCGACCGCCATGATG
ATCCACACCGGCGCATACTCGATGGTGCTAAGCATGTCGGACTTCAGTTTCTTCAACAGGCGCTGATCGT
CAGCACTCACGCCAGGCATCTTCACCACTTTGTCGATAGTGTCAGAAACGCACAGCATAATGCGGCGCAT
CTGGCTACGTTGATCAAGCGACAGCTTGTCGTAGCTTTCCACATCGGTAGTCAACATGCCTTTCAGGCGG
TTGAGCGCGTTAATGGTATTCGACGGATGGCAATGGAACTCCGCGGGTTGCGTTGCGCCAGCTTCCGGAG
CCGGTACTAACTGATCAGCACCGGTCGCTTGTTTCAGCAGCGCAGGATGCTGCTCAAAGTAAGCTTCGAC
GTTGTTGATGGCATCACGGGTACGGGTGATTTCGTAGCCAGTGGCATTCATGTTCACCACGAAGCCTGCT
GGTGCGACACCAATCAATACCAACATAACCAGACCAATGCCTTTCTGACCATCGTTCGCGCCATGCGAAA
ACGCCACGCCGATAGCGGAAAGGATCAGCGCAATACGCGTCCAGAACGGCGGCTTTTTCTTGCCGTCTTT
CTTTTCACGCTCCGCTGGGGTCAGGTGGATACGGGCGCGTTTCTTGGTGCCGCTCCAGTAGCGACGCAGC
AAGAAAATCAGACCGCCAGCAAACACCAGGCCGACAATAGGGGAAACGATCAGAGAACCGAAAATACTTA
ATACTTTCGGGATATTGAGTGCATCCACCACTGACGTCCCGGTCATCAACGCATTGGTTAAACCAATCCC
GATGATCGCGCCAATCAGCGTATGAGAGCTGGATGCAGGTAAACCAAAGTACCAGGTACCCAGGTTCCAG
ATAATCGCCGCCAGCAACATAGAGAACACCATGGCAAGGCCATGAGACGATCCCATATTAAGCAGCAGAT
CCGTCGGCAGCATATGCACAATGGCATAGGCAACACTCAGACCACCCAGCAAAACACCCAAAAAGTTGAA
TACCGCCGCCATAACCACGGCGAGCTGAGAACGCATCGCGCGGGTATAGATAACGGTTGCCACGGCGTTG
GCTGTGTCATGGAAACCATTGATGGCTTCGTAGAACAGCACAAAAGCCAGTGCAAGCAATAATAACAGCC
CGGTATGCAAATCCAGGCCAGCAAACAAATGTAGCATAGGACGTTACGCCATTTTGAGGACATGAACGCG
GCGCATTATCAGTGACTTTCGCGGCGCGGGCAAAGTGAAATATAGACTTTTTTTGATTTGCCTCCTGTAT
GGATTCCACTCAAAAAATAATTATCTTATATAATTCAGGCAAATACTTCCTTTTAGTAATATTGATGCTG
GTGCGACTACTGAGGAATCTTTACAATTCACGCCCGTTTTTTCTTAGAGGAGCGCAACGTGGAAAGGTTT
GATGCCATTATTATAGGCGCTGGTGCGGCAGGGATGTTCTGTTCTGCGCTGGCAGGTCAGGCAGGACGCC
GGGTTCTGCTGATCGATAATGGTAAAAAACCAGGGCGTAAAATCCTCATGTCTGGCGGTGGGCGCTGCAA
CTTTACCAACCTTTATGTCGAACCGGGCGCTTATCTGAGCCAGAATCCGCATTTTTGTAAGTCTGCACTC
GCGCGTTTTACCCAGTGGGATTTCATTGATCTGGTCAATAAACACGGCATCGCCTGGCACGAGAAAACGT
TAGGGCAACTCTTCTGCGATGACTCCGCGCAGCAGATTGTCGACATGCTGGTGGATGAGTGCGAGAAGGG
CAATGTGGCCTTCAGATTGCGTAGCGAAGTGCTGAGCGTGGCGAAGGATGATACAGGCTTCACGCTTGAA
CTGAACGGCATGACTGTCGGTTGCGAAAAGCTGGTCATCGCGACCGGTGGACTGTCAATGCCGGGGCTGG
GCGCATCGCCGTTTGGTTATAAGATTGCCGAACAATTTGGCCTCAACGTGCTGCCGACCCGTGCGGGTCT
GGTGCCATTCACTCTGCATAAACCGTTGCTTGAAGAGTTACAGGTGCTGGCGGGCGTGGCGGTGCCTTCC
GTGATTACCGCTGAAAACGGTACCGTTTTCCGTGAGAACTTACTCTTCACCCACCGCGGCTTATCTGGAC
CGGCGGTGTTGCAGATTTCCAGCTACTGGCAACCGGGTGAATTTGTCAGCATCAATCTGCTACCGGATGT
GGACCTCGAAACCTTCCTGAATGAGCAGCGTAATGCACATCCGAATCAGAGCCTGAAAAACACACTGGCG
GTTCATCTACCGAAGCGGTTGGTTGAACGTTTACAGCAACTCGGGCAAATCCCGGATGTTTCGCTAAAAC
AGCTCAACGTGCGTGACCAACAGGCACTGATTAGCACATTGACCGACTGGCGCGTACAACCCAACGGCAC
TGAAGGCTATCGTACTGCTGAAGTGACGCTCGGCGGCGTGGACACCAACGAACTCTCTTCACGGACGATG
GAAGCGCGCAAAGTGCCTGGGCTGTACTTCATCGGCGAAGTGATGGACGTCACCGGTTGGCTGGGGGGCT
ATAATTTCCAGTGGGCGTGGTCGAGTGCGTGGGCTTGTGCGCAGGATTTGGTGGCAGAATAAGAAGCAAA
ATGCGCTCTCGATACCGGAGGGATTAACCTGAATAAAACCAGATAAGGCGCCCAACGCCTTATCTGAAGC
CTTTTTTATTATTTTTTCGCTGAACCCGCTTCTAATATAGAAACGATGGAAAACAGTGTAAAACAAACTG
CACCTAAGCCAACCAGAACTCGCGAAGGAATAAAGTAAGCCATATCGGTTTGCGCAATTTCAGCCAGGAA
CGCAGCAAGGAACAGACAAAACAGACAGGTAAATACCGGAATCATGGGTATTCTGTTGGCTAACGAACAT
GTGCGTCGCCATACCAGCGCTAACAACCACACTTTGGAGAAAATACTGTAGCAGATCATCCCCAGGCAAA
TGAGAATAATGCCGGGGGCCAGGCGGGCGCTTGCATCTGAACTGATTAATACGTAGATACCAAAAATAAT
GGTAAGTGAGCCAAGCAAAATAACCCAATAGCACCACAGCCAATGTTCTTTCACTGAGAACGTATTCCGC
GTTTGATGGACAATAGTGGCGACAAGGCCAATAAGACAAGCGCAAATTGCCGTTAACCCCATTAGTACGT
GACCTGCAACATAATGTGGTGTGATATCTGCACTACGTAACAGTATGACTGACCAAATGAAACCAAAGAG
AGTAAGCAGAACGGGAACGGCAATTAAGCAATTACCGATTGTTGAAGAATAGGCCTGCAATGGCGTACCG
TCACTCTTACTGCCCGAGGCGTTTTTGGGGATCAACAGAAAATGTCCGGAAGATGCCGCTACGGTTGATA
CACAAGCGGCAATCATGCCAACGCCGAAAATAACATGACCGGCGACAAATTCATCTGCCATCACATTATT
GCTTGCCAACAGTGACCATCCCCAAATCATAGTTGTAGCAGAACCGGCATAACCAATAACGGGAAATAAC
CTGTTGTAGAATTTATTCATGCCGTGAGTTAACTGAGATATAATAATAAATGCGGTAGTGAACAATGCCA
GACATATCGCAGAAAGAGAAATCAGAACATGCCCTGCAACGAAATATTCACTTTGCCCTGAACCGGTTAA
TACAAACTCACCTAATGCGATGCATATTATACCCATCAGTAAAGGAATTAATTTAAACAACCATCCGATA
TATATATTCATTTTAAACCCCATATATATTTTCTGCTACACTTCGAAAAACATATGATTCGTCTTTTCAG
TTAGTTAAATATGTCTATAAGATGCCATCAATTAAAAAAAGTAACTTCACTATAATCGGATTTAGCGTTA
TGGGGATCAACTTTTAGCGGTGAGTTAATGCTATTAAATAAATATTTATCCTAAGATAAACTCTGAATTA
ATATCTTTATCTTATTTTGTTGTTTTAAATGAGTCTTTTAGGGAATATTTTATTAAACCCACGAGCCTTT
ATCATCTATCATCTTTTCAGAATAAATTATTTTATATTCGGTATTTATTCGCACATCAGGCGATAATAAC
GCTATGTGATAGTCATCAGGTTTCCCTGTTACGGAAACCTGTGCAACAGAATCTGTGAACCTGTACAGAA
TATTTTTGGAAAAAACACCAGCGAACGGAAGAACATCGCGATGTATCACAAGTTGATGGCAATCAAATAG
ACAACATGAATATAAATGTTAGTATTTAATTGATTTCACTTATGAGTATGCGTGTTTCATTTACGGCCAG
GAATGCTGATGATGACAACATTACTACCCGTTTTCACTAAGCCTTCCCCATTGGCGCTCAATGCTCTGTG
CGCTGGTCGTATTTGCCATTTCCTTCTTATCCCGGATGGAAGAATCCGCTGAACATCGTTCGGTGGCAGT
TGTAACACGCGTCGATTGCTTACAGGGATTATGGCGGATCGATTATGGATAAGAGTAAGCGCCATCTGGC
GTGGTGGGGTGTCGGGGCACTGGCGGTGGCTGCCGTCGTGGCGTGGTGGCTGTTGCGCCCGGCGGGTGTG
CCGGAAGGCTTTGCTGTCAGCAATGGGCGCATTGAAGCGACGGAAGTGGATATCGCCAGCAAAATTGCCG
GGCGTATCGACACCATTCTGGTGAAAGAAGGCCAGTTTGTTCGAGAAGGTGAAGTGCTGGCGAAGATGGA
TACTCGCGTGTTGCAGGAACAGCGACTGGAAGCCATCGCGCAAATCAAAGAAGCACAAAGTGCCGTTGCC
GCCGCGCAGGCTTTGCTGGAGCAACGCCAAAGCGAAACTCGTGCCGCACAGTCGCTGGTTAATCAACGCC
AGGCAGAACTGGACTCCGTAGCAAAACGTCATACGCGTTCCCGCTCACTGGCACAACGGGGGGCAATTTC
TGCGCAACAGCTGGATGACGACCGCGCCGCCGCTGAGAGCGCCCGAGCTGCGCTGGAATCGGCAAAAGCT
CAGGTTTCTGCTTCTAAAGCCGCTATAGAGGCGGCACGCACCAATATCATTCAGGCGCAAACTCGCGTCG
AAGCGGCACAAGCCACTGAACGGCGCATTGCCGCAGATATCGATGACAGCGAACTGAAAGCCCCGCGTGA
CGGACGCGTGCAGTATCGGGTTGCCGAGCCAGGCGAAGTGCTGGCAGCAGGCGGTCGGGTGCTGAATATG
GTCGATCTCAGCGACGTCTATATGACTTTCTTTCTGCCAACCGAACAGGCGGGCACGCTGAAACTGGGCG
GTGAAGCACGGCTGATCCTCGATGCCGCGCCAGATCTGCGTATTCCCGCGACCATCAGTTTTGTCGCCAG
CGTCGCCCAGTTCACGCCAAAAACCGTCGAAACCAGCGATGAACGGCTGAAATTGATGTTCCGTGTCAAA
GCGCGTATCCCACCGGAATTACTCCAGCAGCATCTGGAATATGTCAAAACCGGATTGCCGGGCGTAGCGT
GGGTGCGGGTGAATGAAGAACTTCCGTGGCCTGACGACCTGGTGGTGAGGTTGCCGCAATGACGCATCTG
GAACTGGTTCCCGTCCCGCCTGTCGCGCAACTGGCGGGCGTGAGCCAGCATTATGGAAAAACCGTTGCGC
TGAACAATATCACACTCGATATTCCGGCCCGTTGCATGGTCGGGCTGATTGGACCGGATGGTGTCGGTAA
ATCGAGCTTGTTGTCGTTGATTTCCGGTGCCCGCGTCATTGAGCAGGGCGGCGTGATGGTGCTGGGCGGC
GATATGCGCGACCCAAAGCATCGCCGCGACGTCTGCCCGCGCATCGCCTGGATGCCGCAGGGGCTGGGCA
AAAATCTCTACCACACCTTGTCGGTGTATGAAAACGTCGATTTTTTCGCCCGCCTGTTCGGTCACGACAA
AGCGGAGCGGGAAGTGCGAATTAATGAGCTGCTGACCAGCACCGGATTAGCACCGTTTCGCGATCGTCCG
GCAGGGAAACTCTCCGGCGGGATGAAGCAAAAACTTGGGCTGTGCTGTGCGTTAATCCACGACCCGGAAT
TGTTGATTCTTGATGAGCCAACAACGGGGGTTGACCCGCTCTCTCGCGCCCAGTTCTGGGATTTGATCGA
CAGTATTCGCCAGCGGCAGAGCAATATGAGCGTGCTGGTTGCCACCGCCTATATGGAAGAGGCGGAACGC
TTCGACTGGCTGGTAGCGATGAATGCCGGAGAAGTGCTGGCAACCGGTAGCGCCGAAGAGTTGCGGCAGC
AAACGCAAAGCGCCACGCTGGAAGAAGCATTTATAAATCTGTTACCGCAAGCACAACGGCAGGCGCATCA
GGCGGTAGTGATCCCACCGTATCAACCTGAAAACGCAGAGATTGCCATCGAAGCGCGCGATCTGACCATG
CGTTTTGGTTCCTTCGTTGCCGTTGATCACGTCAATTTCCGCATTCCACGCGGGGAGATTTTTGGTTTTC
TTGGTTCGAACGGCTGTGGTAAATCCACCACCATGAAAATGCTTACCGGATTGCTGCCCGCCAGCGAAGG
TGAGGCGTGGCTGTTCGGGCAACCGGTTGATCCAAAAGATATCGATACTCGCCGTCGGGTGGGCTATATG
TCGCAGGCGTTTTCGCTCTATAACGAGCTCACCGTGCGGCAAAACCTGGAGTTACATGCCCGTTTGTTTC
ACATCCCGGAAGCGGAAATTCCCGCGCGAGTGGCTGAAATGAGCGAGCGTTTTAAGCTCAACGACGTTGA
AGATGTTCTGCCGGAGTCATTACCGCTCGGCATTCGCCAGCGGCTTTCGCTGGCGGTGGCGGTGATTCAT
CGCCCGGAGATGTTAATCCTCGATGAGCCAACTTCTGGCGTCGATCCGGTGGCGAGGGATATGTTCTGGC
AGTTAATGGTCGATCTTTCGCGCCAGGACAAAGTGACCATTTTCATCTCCACCCACTTTATGAACGAAGC
GGAACGGTGCGATCGCATCTCACTAATGCACGCCGGAAAAGTGCTCGCCAGCGGTACACCGCAGGAACTG
GTTGAGAAACGCGGAGCCGCCAGTCTGGAAGAGGCATTTATCGCCTATTTGCAGGAAGCGGCAGGGCAGA
GCAACGAAGCCGAAGCGCCGCCTGTGGTACATGACACCACCCACGCGCCGCGTCAGGGATTTAGCCTGCG
ACGTCTGTTTAGCTACAGCCGTCGCGAAGCACTGGAACTGCGCCGCGATCCGGTACGTTCGACGCTGGCG
CTGATGGGAACGGTGATCCTGATGCTGATAATGGGTTACGGCATCAGTATGGATGTGGAAAATCTGCGCT
TTGCGGTGCTTGATCGCGACCAGACCGTCAGTAGCCAGGCGTGGACGCTCAATCTCTCCGGTTCCCGTTA
TTTTATCGAACAGCCGCCGCTCACCAGTTATGACGAACTTGATCGTCGGATGCGTGTGGGCGATATCACG
GTGGCGATTGAGATCCCTCCCAATTTTGGCCGCGATATCGCGCGTGGTACGCCCGTGGAACTCGGTGTCT
GGATCGACGGTGCGATGCCGAGCCGCGCCGAAACGGTAAAAGGCTACGTGCAGGCCATGCACCAGAGCTG
GCTACAGGATGTGGCGAGCCGACAGTCCACACCCGCCAGCCAAAGCGGGCTGATGAATATTGAGACGCGC
TATCGCTATAACCCGGACGTAAAAAGCCTGCCGGCGATTGTTCCGGCGGTGATCCCGCTTCTGCTGATGA
TGATCCCGTCAATGCTAAGCGCCCTTAGCGTGGTGCGGGAAAAAGAGCTAGGGTCGATTATCAACCTTTA
CGTGACCCCCACCACCCGTAGCGAATTTTTACTTGGCAAACAGCTGCCATACATCGCGCTGGGGATGCTG
AACTTTTTCCTGCTCTGCGCCCTGTCGGTGTTTGTGTTTGGCGTACCGCATAAAGGCAGTTTCCTGACTC
TCACCCTGGCGGCGCTGCTGTATATCATCATCGCCACCGGAATGGGGCTGCTGATCTCCACCTTTATGAA
AAGCCAGATTGCCGCCATTTTCGGTACGGCAATTATCACGTTGATCCCGGCGACACAGTTTTCCGGGATG
ATCGATCCGGTAGCTTCGCTGGAAGGTCCAGGACGTTGGATCGGCGAGGTTTATCCCACCAGTCATTTTC
TGACTATCGCCCGCGGAACGTTCTCGAAAGCGCTGGATCTGACTGATTTGTGGCAACTTTTTATCCCGTT
GCTGATAGCCATACCGCTGGTGATGGGCTTAAGCATCCTGCTGCTGAAAAAACAGGAGGGATGATGCGCC
ATTTACGCAATATTTTTAATCTGGGTATCAAAGAGTTGCGCAGTCTGCTCGGTGATAAAGCGATGCTGAC
GCTGATTGTCTTCTCGTTTACGGTGTCGGTGTATTCGTCAGCGACCGTTACGCCAGGATCGTTGAACCTC
GCGCCGATCGCCATAGCCGATATGGATCAATCGCAGTTGTCGAACCGGATCGTTAACAGCTTCTATCGCC
CGTGGTTTTTGCCACCGGAGATGATCACCGCCGATGAGATGGATGCCGGACTGGACGCCGGACGTTATAC
CTTCGCGATAAATATTCCGCCTAATTTTCAGCGTGATGTCCTCGCCGGACGCCAGCCGGATATTCAGGTG
AACGTCGATGCCACGCGCATGAGCCAGGCATTCACTGGCAACGGTTATATCCAGAATATTATCAACGGTG
AAGTGAACAGCTTTGTCGCGCGTTACCGTGATAACAGCGAACCGTTGGTATCGCTGGAAACCCGGATGCG
CTTTAACCCGAACCTCGATCCCGCGTGGTTTGGCGGGGTGATGGCGATCATCAACAACATTACCATGCTG
GCGATTGTGTTGACCGGATCGGCACTGATCCGCGAGCGTGAACACGGCACGGTGGAACACTTACTGGTGA
TGCCGATAACGCCGTTTGAGATCATGATGGCAAAGGTCTGGTCGATGGGGCTGGTGGTGCTGGTGGTATC
GGGATTATCGCTGGTGCTGATGGTGAAAGGCGTGCTGGGCGTACCGATAGAAGGCTCGATCCCGCTGTTT
ATGCTGGGCGTGGCGCTCAGTCTGTTTGCCACCACGTCAATCGGCATTTTTATGGGGACGATAGCGCGTT
CAATGCCGCAACTGGGGCTGCTGGTGATTCTGGTGCTGCTGCCGCTGCAAATGCTTTCCGGTGGTTCCAC
GCCGCGCGAAAGTATGCCGCAGATGGTGCAGGACATTATGCTGACCATGCCGACGACACACTTTGTTAGC
CTCGCGCAGGCCATTCTCTACCGTGGTGCCGGATTCGAAATCGTCTGGCCGCAGTTCCTGACGCTGATGG
CAATTGGCGGCGCGTTTTTCACCATCGCACTGCTGCGATTCAGGAAGACGATTGGGACAATGGCGTAAGG
AAGGGAAACTTGACTTCATATTGTGATGTCATACTATTGATGTCATAAAGTGAAGTCATAAGGACATGCC
ATGAGAACCCAGGTACAGGCTTTGCGGAAGAAACAAAAAAATACATTGGATCAAATATTTAAATCTCCTG
TTCCTCAAGGGATTAAGTGGTCTGATATAGAGTCACTGGTTAAAGCATTAGGCGGAGAAATTAAGGAAGG
AAGAGGTTCGCGTTGTAAGTTCATACTAAATATGAGCGTTGCGTGTTTCCATCGGCCTCATCCGTCGCCA
GATACCGATAAAGGCGCTGTAGAAAGCGTGCGTGACTGGTTACTAAGTATAGGGGTAAAACCATGATCAA
ACTGAAGACGCCAAACTCTATGGAGATTGCCGGGCAACCTGCTGTTATCACTTACGTGCCAGAACTGAAT
GCATTTCGTGGCAAATTCCTGGGCTTGTCAGGTTATTGTGATTTTGTCTCTGACAGCATTCAGGGGCTGC
AAAAAGAAGGGGAGCTTTCCCTGCGAGAGTATCTTGAGGATTGTAAAGCTGCGGGTATTGAGCCGTATGC
GCGTACAGAAAAGATTAAGACCTTTACATTACGCTATCCAGAATCGCTGAGTGAACGCCTTAATAATGCG
GCTGCGCAGCAACAAGTCTCTGTAAATACTTATATTATTGAAACGCTAAATGAGCGTTTGAATCATTTAT
AAATTTTAGCGTCGTACATTACGCAGAATATCTGCCTTTACAGGATCTATCTATGCAACTGAACTTAATT
TTATAAATTAAGTTCAGTTAATATCTTTTCTTTCCTCGTTTTAGAAATAACTCAATCTTCCTTCGGCAGG
CACTGCAAATGCCCGTGCCGCACGCCGCGCTGGGCGATGACGTCATCGGCAAAATGCTGCACGTCGCTCA
TGTCACCTTTCAACACGGCGATTTCCAGACAGTCGTCGTGATTAATGTGCACATGCAGAGTAGCAACCGA
GAGATCGTGGTGATGATGCTGGGTGGAGACAATACGGCTGGCTAAGTCGCGTTTTTCGTGTTCATACACA
TACGACAGCACCGCGAAACCTTGTGTGCCGTGTTGTTGAGTGGCTTCCTGCGCCAGAGCGCTACGCAGAA
TATCGCGGATCGCCTCGGAACGGTTGTTATAACCACGACGCTGGCTCAGGCTGTCCAGCGTCTCCAGTAA
ATCGTCATCAAGCGTGATGGTGACTCGTTGCATTTGCGTTAAACCTTTTCTGTGGTGCGACGGCGCACGG
GGAATGCGGGTAATACCGCGTTTTGTAGCACACGTCCGGCGTCAGAGGAAAAGGTTAATTTATCTCCCAC
CACCTGGGTTTCGACGATTTGTCCGTTGTCCATCACCATCACCCGCTGACAGAAGCGTTCCACAAGGCGT
AAGTCGTGGGTGATGAACAAGCAGGCGGTGCCAAACTGTTGTTGCAGCTTTTTCAGCAGGCGAATGACGC
CCGCCTGTAACACGAGATCAAGGTTCGAAACCGCTTCATCCAGAATCAGCAGTTTCGGTTCGACCGCCAG
CGCGCGTGCCAGGCAGACACGCTGGAGCTGGCCGCCGCTTAACTGCGGTGGGCGTTTGTCGAGCACGCTA
TCGTCGAGATCGACCGCCTTCAGCATTTCACTGGCGCGCGCCAGTTGTTCGGCTTTTTTCAGCGATAGCA
GGTGGCGCATCGGTTCACGCAGGATCTCGCGCACGGTTTTGCGCGGATTCACGGCGCTGATGGAGTCCTG
AAACACCATTTGAATATCACGGCGGAACGCTTTACGTTGCGCGCGATTGAGCTTCGCCAACGGTTCGCCG
CGCCAGCTAATATTTCCCTGTGAGGGCGACTCTAACCCTACCAGCAGCCGCGCGAGGGTACTTTTTCCGC
AGCCGCTGCGCCCCAGCAGGGCGACGGTTTCACCGCTTTTCAGGGCCAGGGAAACGTTATTCAGCACCGC
CTGGTGTTGATGTTTGCCGCTAAATCCACCGTGCGCGTAGTGATGGGAAAGGTCGGAGACGTTAAGTAAA
GTCATGATGCCAGCTCCATACCGTAGAGGGCGAGATGAGCGGAAACCAGGCTGCGCGTTACCGCATGTTT
GGGGGCGTTAAACAGCGTTTCTACATCGCCCTGTTCGACAATTTTACCGTGAGACATTACCGCCACATCG
TCTGCCAGACGCGCTACCACGCCCATATCATGGGTAACCAGCAGCATTCCCGGTGCTTGTTTTTGCATAA
TGCTTTCCAGTAGATCGAGGATGCGTGCTTGTGCTACCACGTCGAGATCGGTGGTTGGTTCATCGGCGAT
GATAAACGGTGATTCGCACAGCACCGCCATCGCAATCATCATGCGCTGCAACATGCCGCCGCTCATCTCG
AACGGGTAGAGCTTCAGCACGCGCGCGGCGTTTTCCAGCCCCACCGCTTCTATGGCAGCGGTAAGCGTAG
CGTCATCGGCGGGTTTCCCCAGCGCCAGGCAGGTTTCACGCGCGTGAGTGTGCATGGTGTGCAGCGGATT
AAAGGCGCTGCGCGGGTTCTGCATGATGGTGGCAATTTTGATACCGCGCAGGGCGCAGGGAGAAACCGGT
TTTCCATCGGCCAAAATTTCCCCCGCCGTCTGGCGAACGCCAGCAGGCAGAATGCCCAGCGTCGCGGCGC
AGGTCAGCGACTTCCCGCTGCCACTTCCGCCGACTAACGCCAGCACGCGCCCACGTTGCAGGGTTAACGA
TACGCCATGCACCAGCGGCTGCGCGGCCTGTAGCGCGATATTACGGAGTTCAATCTGTTGCGGCATTAGT
GTGCGTGCTCCGTCACCAGATGAGGGTCCAGATGATCGCGCAGTGCGTCACCCACCAGGTTAAAGGCCAT
CACGCTGATAAACAGCGCCAGCCCCGGCCAGAACATTTGCAGCGGCTGGGTCCAGATATACTGACGCGCG
TCGTTAATCATCACGCCCCATTCGGCGGTCGGCGCGGTCACGCCGAGACCGAGGAAGGACATCCCCGCGA
CGTGTAGCATCATATGACCGATATCCAGCGTCGCCAGCACCAGCAGCGAGGGGATCACCGCACCTGCCAG
ATGATCAATAAACACCCGCACATGGCCCGCGCCAGAAAGCCGTGATGCCAGCACAAACTCGCGCTGGCGC
AGTGAAATCACCAGACTGCGCACCATGCGCGCGTACCATGCCCAGTGCGAAAGGGCGATAGCGATAATTA
CGTTGGTCAACCCGGTGCCAAGCACGCCGACCATAAAGAACGACAGAATCGAGGTTGGGAAGGTCATAAA
CATATCCGCGACGCGCATGGTGGCCTGATCAACGCGCCCGCCAATCAGCCCGGCGCTGCCGCCAATAATC
AGCCCTAATGTCAGCACCAACAGCAGGCAGGCCATTACCGAGCCGAGCGACACGCGGGTCGCTGCCATCA
GCCGCGAGAAAATATCGCGCCCTAAATGATCGGTGCCCAGCCAGTGCTGCGCATCCGGCGAGAGCAGGCG
CGACGGCAAATCAATAGCCTGAGGGTCATACGGCAGCCACCACTGGCTGGTGAGCGCAATCAGCGCCAGC
AGGGCGATAATGATCAGCGCCAGGCGAACCGACCAGCGGGAGGAGAGGAAAAAGTTCACGCGTGCGCTCC
TTCATGACGACGAATACGCGGGTCCAGCGCGGCGTTGAGCAAATCGACAATCAAATTACAGACCACAAAA
ACCACCACCATCATCAGCGTAAAGCATTGGATCACCGGATAGTCACGGTTGAAAATCGCCGACACCGCAT
AGCGCCCGACGCCCGGCCAGGCAAAGATGTTTTCGATAATCATCGTCCCGCCAATCAGTTCGCCAATGTG
CATCCCCACGGCAGTGATCATCGGCAGCGAGGCATTGCGCAGAATATGGCGGCGTTCGGTCTGTTTGTCG
CTCAGACCACGCAGTCGTGCCCAGGTGACGTGACGCTGACCGGCGACGTCCAGCATACTGGCGCGCAGCA
AACGCGCGTTAATCGCCAGCGACATAAAGGCGATGGATACCGCAGGCAAAATGATGTGCTGCCAGCCGCC
GTAACCCATCGCGGGTAGCCATTGCAGATACACCGAAAACGCCATCACCAGTAAAAACGCCAGCCAGAAG
TTAGGCATCGACACGCCGAGAAACGCGATGAAACGGACGGCGAAATCCGGCAGACGATCGCGATGGCGCG
CCGCCCAGATACCGAGCGGCACGGAGGTGAGCAGAATTAATACCAGCGCCGCACCTGCAAGTTCCAGCGT
GGCGGGCAGGAAATTCAGCATATCGTCCAGCACCGGGCGTTGGCTGGCGAATGAGATACCAAAGTCAAGA
TGCAGCGCCTTCCACAACCAGGTGCCATACTGGACGTACAGCGGCTGATCCAGCCCCAGCATAGTGCGGG
TAGAGGCCAGCATCTCCGGCGTCGGCGGCAGGTTAGATAAACGCAAATAATCAAGCGCCGGGTCGCCGGT
GCCGAGGCGCAGCATCAGAAAAATGATCACCGAGGCGGCGAGCACCATCGGGATCAGCAGCAGAAAGCGG
CGTAATACATAACGCAACATTAAGGTTTCACCGGTTTAATCTGTTCGAACGGGATTTCGGTGGCGATCGG
CGCGTAGGGGATGTTACCCAGTTCCGGTTTTGAAACCACCATCATTGAGATGTAACTGATAGGCAGATAA
ACCGCCTCGTCATGCAGACGGGTCAGAATGTCGCGATACAGCGCCTGACGTTGCGTTTCGTCATGGGTCG
CCAGCACTTCGCCGATCTCTTTATCAATCAGCGGCTTGTCGGCTAAACCTTGCTGTGCCTGGAAGTCAGC
GTGCGACGGTACGCGCATTGAACTCAGGAAGGCGTGTGGATCGTATGGCGCGCCCCAGGTGCGGTGGAAA
ATCATGCCAAAACGACCGTCGCGCTGACGAGCATAGATACTGCTCTCTTCTTCGCCAATCAGCGAGACAT
CTGCGCCAATCTGGCGCATATCAGCCTGAATGATTTCCGCCATCGATTTGCTTAACGCATCGGTGCCGAT
GAACGACAGTTCAATGCGCAGCGGCTGACCATTTTTCTCGCGGATGTCTTTGCCAGCAGGCAGCGTCCAA
CCGGCTTTTTCCAGCAACGCTTTCGCTTTCTGCGGATCGTACTGGCGCGGTTTCAGGCCGAGGTTGGCGT
AGGGCACAGAAGGGGCAAACAGGGTGTCGGCAACCTGCTGGGTACCATACAACGCGTTATCAATCAGCGA
TTTTTTGTTCACCGCGTAATTAAGAGCTTCACGGACTGCCAGCTCGTTGGTGGGGGCTTTGGCGGTATTG
AGCGCCAGCATCACGGTTTCGATCGGCTGTGACAGTTGAGTGTGGTAAGCCGGGTTCTGGCTAAAGCGGG
CGAAGGTATCAAGCGGTAATAACCCTTCGTTTCCGTACAGCAGGTCGATATCGCCAGTTTCAAACGCCAC
CGCGCGGGTAGTCGGGTCCGGGATCACGTTAAAGGTGATCTTTTTAATCGCCGGCTTTTCGCCCCAGTAG
TTTTCGTTACGGACGAAGACATCGTACTGATTCAGTTTCGATTCCTGTAAAACCCACGGCCCGGTGCCAA
TCGGCGCTTTAATTCCGTTCATGGTTTCGTGGTTTTTAAACTGCGAGGGTGCGATAAAACGGAAAGGACG
GGGCAGGGCCAGTTCTTGCAGGAAAGGATAGTAGGCGCTTTTCAGGGTGATTTGCAGCTCGTTTTTACTG
AGTGCTTTGACATCAACAATCTGGTTTGCCAGCTCCAGCCAGGCGTGACGTTGACGGTTATCGAGCACTG
CACGGAAGTTTTCTGCCGCCGCCTCTGCATCAAACGGTTCGCCGTTGGAGAATTTCACGTCATCACGCAG
GGTGAAGGTCCAGGTTTTACCATCTTCTGAATGAGTCCAGCTTTTTGCCAGCCACGGGATCACCGAACCG
TCTGCCTGATATTTCACCAGCGGTTCATAAACCATGCTCTGGGCGAACATTTGGTTAGGCGTGTAAAGGT
GCGGGTTTAGTGGCCCGACATTCACCGGCCAGGCGGTGGTGATTTCATCTGGTGCAGCGGCATGGACGAT
AAAAGACGCACAAGCCAGCAGCGCAAATAGAGTGCGGCGGAGTGTAGAGAACATGGTAACCCCAATGGAT
TAAAATAGATGGCGGAAATAAGTATGACGATTTTAAGTATTCGTCATACTGATTACCTGTTCTGGATCAA
TAGATGGGCAGTCGGGTGGGCGGATCAGTTAACTGAATCGATCCATTGCACACTGTCGGCGGTGAGCGTA
AAGGGGGTAGGGGTGCAGATCGCCAGGCTTAAATTTTCTAGCTGACAATGGCTGACTGACAGCGAGGAGT
TATAGGTGCTGTCTACGCTGACGATTTGCCAGGCGCTGCCGCCACGCTGTTTAACGATGGCTTCTTTGCG
CGTCCAGATGCGCCAGAACATTTCCAGTTGCTGATCAGGATGCACGGCGTCCATCTCGGCATGTTCCCCG
AGGCTGAATACGGCGTTCGCCAGCCAGCGCCAGTTGGCGCGCGGGCGAATCACTTCGATATCGCAGCCGA
CTTCGCCTTCATCGCTCAACAGCAGGGCGATATCGTCACCGCTATGGCTTAAGTTGAACCATAGCGGCGT
TTCCGGCGCGAATGCAGGTTTGCCTTGTTCGCCATAGATGATCTCCGGTAGCGGGGAAAGCGTGTGCGAA
AGCAATGCACGCCCCGCCAGCCAGCGTTCGCGTCGTGGACCTTGCGGTGCTTGCTCGCGTAAACCCGGTG
GCAGAGGAGCTGCGCTTAAGGTCGAAACTTTCCCCAGAACTATCCGATACATATCAGGGCCAACGTTTAA
TGGAAAATGAAAGTGCGTATCGTAACACTTGTCGCCTCATCCCGGTAACCGACTTTTCGGTCTGCCTGGC
CCCAGTAGAATCGCCAGTTTGCTGCCGCCTTTGGTGGTTTCCATCCAGATTTTACACACGCTGGTTAATG
GCACCGAAAGTAGCATCCCTACCGGGCCGAGCAGCCATCCCCAAATTAACAATGAAAGAAATACCACCAT
GGTGGACATCCCCAGGCGATGGCCCATCATCCGTGGTTCTAAAATATTGCCGATGACCATATGGACCACT
AAAAACAATGCGCCGACCAGAATACATTCGTAAATACCATTAAACAGCAGCACCTGAATCATTGGCGGTA
CGGCGGAAATTACCGCACCGATGTTGGGCACGTAGTTGAGCAAAAACGCCAGTACTGCCCACATCAGCGC
AAACTGCACCCCCATCAGCTCCAGCCCCAGCCAGACGATTACGCCTGTCCATAAACTGAGTAGCGTCTTT
AACGCCAGATAATGCGAAACGCCTTTAAGTGCGCGGTGTAGTCCGGCGATGTGAATCTGTGGATTATTCA
ACGCGAAACGCATTTTGTAAGGGACGTGGCGCACTTCAAACAGCATAAAAACTACGGTCATCACCAGCAA
AAGCACGCTCGCCATTGCCCCGGAAAGCCCGGTCATTAGCGCCGTGGTGAAGGTAACCACTTTTTCCGAG
TCCATCCGCTGTAGTATTCGCTCCGGCGACATATGCAAATTAAGAAAAGGCAACATCTCCTGCAATTTAA
AAAGTTTGCGCGTCAGCTCCTTATTAAACTTCGGCAGCATAGAGATAAATTCGTTAAACGATGCCGCCAG
TACGCCGACCAGCGCGGTGAGTGCGATCAGCATCACCACAACCACAATCGTAATGGCAACGGGGCGTTGT
ACTCCCCGACGAATAAACCAGGTGACGAGCGGGTTGAGAACGATGGCAAAAAACAGCGCCAGTAATAGCT
GCACAATGATATCTGCCGCTGCGTGAATGCCCGCGAGGATCACTACCAGCGAGGCCAACTTGAGCAGAAT
GTGCATGCCCGTTTTATCGGGTTGAGGGGTTTCCATTGGGGCTTCCTTGTGACTTTTTGTATTAAGTGTA
GCGGGAGTCACGCCAGCAATATTCTGATTCTTACTGCTGATTTTCACGTCAGCACATGGTAAAAATGAAA
CACTGTTGTAAAAATGTGGTGATCCTCATGCCCGAACCCGTAGCCGAACCCGCGCTAAACGGATTGCGCC
TGAATTTGCGCATTGTCTCCATTGTCATGTTTAACTTCGCCAGCTACCTTACCATCGGGTTGCCGCTCGC
TGTATTACCGGGCTATGTCCATGATGTAATGGGATTTAGTGCCTTCTGGGCAGGGTTGGTTATCAGCCTG
CAATATTTTGCCACCTTGCTGAGCCGTCCTCATGCCGGACGTTACGCCGATTTGCTGGGACCCAAAAAGA
TTGTCGTCTTCGGTTTATGCGGCTGCTTTTTGAGCGGTTTGGGATATCTGACGGCAGGATTAACCGCCAG
TCTGCCCGTCATCAGCCTGTTATTACTGTGCCTTGGGCGCGTAATCCTTGGGATTGGACAAAGTTTTGCC
GGAACGGGATCGACCCTGTGGGGTGTTGGCGTGGTTGGTTCGCTACATATCGGGCGGGTGATTTCGTGGA
ACGGTATTGTCACTTACGGGGCGATGGCGATGGGTGCGCCGTTAGGTGTCGTGTTTTATCACTGGGGCGG
ATTGCAGGCGTTAGCGTTAATCATTATGGGCGTGGCGCTGGTGGCCATTTTGTTGGCGATCCCGCGTCCG
ACGGTAAAAGCCAGTAAAGGCAAACCGCTGCCGTTTCGTGCGGTGCTTGGGCGCGTCTGGCTGTACGGTA
TGGCGCTGGCACTGGCTTCCGCCGGATTTGGCGTTATCGCCACCTTTATCACGCTGTTTTATGACGCTAA
AGGTTGGGACGGTGCGGCTTTCGCGCTGACGCTGTTTAGCTGTGCGTTTGTCGGTACGCGTTTGTTATTT
CCTAACGGCATTAACCGGATCGGCGGCTTAAATGTGGCGATGATTTGCTTTAGCGTTGAGATAATCGGCC
TGCTACTGGTTGGCGTGGCGACTATGCCGTGGATGGCGAAAATCGGCGTCTTACTCGCGGGGGCGGGGTT
TTCGCTGGTGTTCCCGGCATTGGGCGTAGTGGCGGTAAAAGCGGTTCCGCAGCAAAATCAGGGGGCGGCG
CTGGCAACTTACACCGTATTTATGGATTTATCGCTTGGCGTGACCGGACCACTGGCTGGGCTGGTGATGA
GTTGGGCGGGCGTCCCGGTGATTTATCTGGCGGCGGCGGGACTGGTCGCAATCGCGTTATTACTGACGTG
GCGATTAAAAAAACGGCCCCCGGTGGAAATACCTGAGGCCGCCTCATCATCTTAAAACTTACTGAATAAC
CAGCGTATTAATGATGTTTTCTGCGGTGGTCTGTGCTTTTTGCTGATTGTCAGCGGGCAGCGTAATTTGC
ATGGTTAGCAGTTGATTACCCACGTTACCCAGAATAACGGAAGAGTACGCCGTCTGGCCTTTCGCGGAGA
TAATGCTGTCTAACTGCTGCATTTTGTGACCTTTCAGCTCAATGGCTTTATTGGTTACCACTTGCAGCTG
CGGATCGCGGCTACGTTGCTGATCTTCCAGACGCTTCGCCAGCACCGCCAGATCTTCTTTCGGATCATCG
CCCATGATGACAATGACTGCTTTCTGCCCGGTGGCGTCGGACCAGACATGCATGTTATTGGCCTGCGTTC
CCAGCTTACCGCTCTGGTCGGTCATATCCGCTGGCAGCGAGAAACTTAACTTGCCATCAAGCAGGTTGAC
GGGATTCCCGGTCGCGTTACTTTCTGCGACCGAACCCTGCGCCGTAGCGTTAGTGTCTTTATCATCACAG
GCCGCAAGCCCCATAACCAGCAGGCCAATTCCGACATATTTAACCAGATTGCGCATTGACTTCTTCCTTT
CGATAAACGGCCATAACGGCTCATTCATCCATCTTATCACAACTCTGATAACGAACCTTTAACTCGCCTG
CAAAGCGTTGATTTCGGATTTATCTGCCAGTCTTTTCAACAGCATATTGAGTAGTACGCCATACATTGGC
AGGAAGAAAACGATACTGATTAACACTTTGAAACAGTAATCGACCAGCGCGATTTCCATCCAGTGTTCAG
CCATAAAGGCATCCGGGCTACGCCAGAAGGCAATGAAGAAGAAGGCCAGCGTGTCGCTGACGTTACCGAA
CAGTGTGGACGCTGTCGGTGCCAGCCACCAGTGACGACTCTGACGCAGGCGGTTAAAAACGTGCACGTCG
AGGATCTGCCCCAGCGCGTAGGCCATGAAACTGGCGGTGGCGATACGGGCGACAAACAGGTTGAAGTGGG
CGAGCGCGCCGAATCCTTGCCATGACCCCATATAAAACAGCGATGAGATGACGTAGGAGATCAGCAATGC
GGGGATCATTACCGCAAAGATGATGCGACGAGCCAGCGGCGCGCCAAAAATACGCACGGTCAGGTCAGTA
GCGAGAAAGATAAACGGAAAGCTAAACGCGCCCCAGGTGGTATGGAAACCAAAAATGGAGACGGGAAGCT
GAACCAGATAGTTACTGGAGGTGATCACCAGCAGATGAAATAACGATAACCAGAACAACGCCTTATAGCG
TTGCGTTTGCGAGAAAACGTTCATATTGTACCTTTTTGATTAACCATTGGGGTGAGGGAACCCAATACGT
ACGACACGTCTGTTACCTTAACATAATAACGTGCTGACCCTTTTTTCGAGCCGCCGCATGATACTGCTTT
ACGTTGACAATGCAATGGTTAATTTTCACGCAATCGTTAACCTGGTTTGCTTACGGACTCACAGGGCGTA
AACTAGCGCCGTTTTTTTATGTGATGAGAAGAAAATGACCGATCTCTTTTCCAGTCCTGACCATACACTC
GACGCGCTTGGCTTGCGCTGCCCGGAACCGGTGATGATGGTGCGTAAAACGGTGCGCAATATGCAACCAG
GCGAAACGTTGTTGATTATTGCCGACGATCCGGCGACGACCCGCGATATTCCTGGGTTTTGTACCTTTAT
GGAACACGAACTGGTTGCTAAAGAGACGGATGGACTGCCTTATCGTTATTTGATTCGTAAAGGCGGTTAA
TGGGGGAAGATGGGCTTCGATGCCGCCTTTTCCCCTCACCCTAACCCTCTCCCCAGAGGAGCGCTGTCTC
TTGATCAGATCTCCTGATCAAGAGACTTCATCACCAGGTAACCCTCAACCATATCCTGAAGTCTGAACCA
GCCATCCCACATGACTACCCAACCGGGGCGACCGGTGCGTTTGCTGTCATGCCATCGCCCCAGTTTCGCC
AGTTTCAGACAGGCCCATTTCAGTGTCGGCATCTGTGACGGAAGCGGTTTTCCTTCCAGCTTAACCCACA
GCAGTTTCCACTCTGTCGGCGTCAGTATTTTCTCACAGCTGTCATTTTGTGTTTCTTCACTGATACCGCC
CTGCCGCAGGCCCAGCACCCGCACCGCGATAAACGCCTTGATAACCACCATGCGCTCGAGGTTATCCCGG
GTCTGCATTCGCAGCGATTCCACACATGTACCACCACTTTTCCACGCCTTGTGGTATTCCTCTATCAGCC
AGCGTCGCTCGTAATGGCTGACGATACGTCGCGCATCGGCGGCACTCGCCACTTTTTCTGACGTCAGCAG
ATGCCAGCAGGCGCCGTCCTCTGCCTGCTCCCGGCAACAGACATACGTGAGCGGGAGCGCCTGGCCGCTG
TTGTCGGGATTTTTTATGCTGACTTCGCTGTAACTGATGAACATCCGGGCCTGGCGGGCTGCCCGCCCGC
CTTTTTGCATCACATTCAGCGTGTGGCTTCCCGCGGTTGCCAGGACTTCCGGCAGTTCGAAGAGCTTGCC
GGGTGCTTCTTCCAGCCGGCGATTCTGTGCTGCACGCACCACGAAGCGCTGCCCGTGGCTGACTTTATAA
TGCAGGTAATGCCAGATATCCGCTTCCCGGTCACAGACAGTGATTACCCGTTTCTGTATCTCCCCCAGCC
GTTCGGCCATGCGCTCCGAAGCCTGCTGCCAGCGGTAACTTTCTTTTTCTTCATAGGGACGTTCTTTTCG
CTGGTGCTTAACACCGTAGGTGTCCGTGGCACGACTCCAGCGCTGCTGTTCGATAAGACCGACTGGCAGG
GCGCTGTCGGGGGCGTACATCAGGACAGAGTGAGCCAGCAGCCCGCGCGTCTTCGGGTTAGTGGTGGTAT
TCCCCAGGTCATCAGATGCCGTACTGTGACTGAAGTTAATGGTGGTGGTGTCTTCCAGCGCGAGGAGCAG
CGGATGAGCCTCACATGCCCTTACAGTGGCGGTAAATCCGGCTTCGGCAATGGCTTGCGGGGACACAGAC
GGGTTACGTATCAGGCGGTACGCACCTTCAACCTGAGCAGTGGACTGGGATGATTTCACAATAGAAAGAC
CTGCATGCTGAGCGAGAGAAGAGGCCAGTGACACAAGGCGTCGTGTACGACGCGGATCACCGAGACGGGC
ATGTCCAAACTGCTCGTTAGCCCATGAATAACAATCAGAAAGTACCATAACAGACCCGAAGAAAATGAAA
TATAAGAGAAGATCAACGGGTGAGGAAAAAGTTCAAAAAATCGCTGCCGGGGAGGAAGGAAACTACCGGA
TGGAAAGAGTCCCCCTAAAGCAGACTGACAGACATCACAAATCCCCGGGTGGGGATTTGTGTATAAGAGA
CAGAGAGGAGCGAGGGGACCGATCGCGCTCAATGTTGCTGCTTGAAACCGGTTTGTAGGCCGGATAAGGC
GTTCAAGCTGCATCTGGCGATACGGTGCACAATGCCTGATGCGACGCTGTCGCGTCTTATCATGCCTACG
AGTTCGATGCTCTGTGTAGGCCGGATAAGATGTTCACGCCGCATCCGGCATTGTTGGACCGTAGACTGAT
AGCCTCTTTATTTCCTGCGCAATAACCGTAACGCATTCGCCGTCACCAGCACCGTCGCACCGGTATCTGC
CAGCACTGCCAGCCACAGTCCGGTCATCCCTAACAGCGTCGTGACGAGGAAAACGCCTTTCAGCCCCAGC
GCAATAGTGATGTTCTGGCGGATATTGGCGTGAGTGGCGCGTGCCAGTTCAATCATTTGCACCAGACCGC
GCAGGTGGTTATGGGTTAATGCTGCATCGGCGGTTTCCAGCGCCACGTCTGTGCCGCTACCCATTGCAAT
CCCGATGGCGGCAGCTTTCATCGCTGGCGCGTCGTTAATACCATCACCGACCATCGCCAGCGGCGCATGT
TGATTCAGCTCGGTCACCGCTTTGACTTTATCTTCCGGCAAGAGGCCCGCTTTAAATTCCAGCCCCAGTT
CCCCGGCGATTGCCGCTGCTGCGCGTGGATTATCGCCGGTGAGGATCACCCCTTTGACACCCAGCGCGTT
CAGTTCACTGATAGCAGTTGCAGCATCGGCGCGCAGGGTATCCTGCAACGCAATGACACCCAGCACGTCA
TCATTACGTACTACCAGCACTACCGTTTGCCCGGCGCTTTCCAGTTCATTAATCAAACCAGCAAATGCAT
CAGCAGGATGTTTTCCGGCAGCGCATATCAACACGCGCTCACCGTTAACCTGCGCTTCAATGCCAGCCCC
GACCAGCGCCCGCTGTGATTGGGCGGTGGGAATGGCGAGTTCAGCAACCTGTGCTTCGCGCACAATGGCC
TGTGCCAGTGGATGCGTCGCGCCTTGCTCGACCGCCGCCGCCAGTGTCAGCAGTTCAGATTCACTAATAC
CCGTTGCCGGATGAATCGCGGTAACGCGCGGTTTACCGACGGTCAGCGTACCGGTTTTATCAAACGCCAC
CTGGGTAACACGACCCAGCTGCTCCAGCGCCGCGCCGCCTTTAATCAACGCCCCACGACGCGCTGCTGCC
GCCAGCCCGGAGGTAATCGCCGCGGGCGTGGAGATAACTAAAGCACACGGGCAACCAATCAGCAGCAGCG
TCAGCCCTTTATAAATCCACTCCTGCCAGCTGGCGGCAAACAGCAGCGGCGGCACCAGCGTTACCAGCAG
GGCGACGGCCATAATCGCTGGCGTGTAAATACGGCTGAAACGGTCGATAAACCGCTCAATAGGTGCGCGG
CGCTCTTCGGCTTCTTCAATCAGTTTCAGAATCCGGTCAATGGCGCTGGCACCCGGTTCTGACAGCACTT
CCAGCGTTACCAGACGGTCTACGCTGGTGGCGCCTGCAGGAACTTTATCGCCCGTCGCGCGCTCCACAGG
AATGGATTCTCCGGTCAGGGCGCTTTCATCAAAACTGGCAAACGGTGAGAGCAGTTTACCGTCGGCAGGC
AAACGCCCACCTGCCGCAACTTCAATCACATCGCCAGGCCGCAGGCTGTTTATTGCCACCTCTTCACGCT
CACCGTTACGCAGACGCGTGGCGGTTTCTGGCTTCAGCGCCATTAACGCGCTGACCCCTTGACGCGCGCG
GCTGGCGGCCCAGCCTTCCAGTCGTTCGCCAATCAAAAACAGCAGCAACACCATCGCAGCTTCAGCCGTT
GCGCCAATAAACAGCGCACCAATAGCGGCTACGCTCATTAAGGTTTCAATGGCGAAGTAGCTGCCAGATT
TGATCAGCCGTAATGCCTGACGAGCAATTGGGTACAGCCCAACCAGCGTGGTCGCGATAAACGCCAGTTG
ACCAAACGGATGATTGAACTGCTCCAGCCCCCAACTGATTGCCATCATCACGATAAGCGTAATCAGCGGC
AGATTCTCTTTCAGGCGTGATTCTTGTGGTTCGTCGGAGGCCTGTTCATCGCGCAGGGAATAGCCCGCTT
TTTGCACCGCAGATTCAACTTGTGCCCGTATGTCATTGTCGGCATCCACCACCAGTTTTTCGGTGGCGAA
CAACACCTGTACCTGATTCACGCCTGCAAGCTGGCGCACGGCATTTTCCACTTTGCGCGCACAGGCGGCG
CAGTCCATACCGCTGACTTTCCAGCTATAGCGGGTGCCGGAGACGTTTTCAGAGAGAGTTGGCGTGCTGG
AACATGCGCCGTCGCAGCAACAGTCGTTGGTGTTCTGTACCGTAGTTAGCGGTTTGAACGCAGCAAATTG
AGGGGCTTTCTTGCCGTGATTGTCAGGAGTCGACATGGCATCCTCCGGTTAAGTTTTTTCTCATTAACCG
AAGGATACACTCTAGAGTCGACTCCAGAGTCAAGTTTTATCAGAGATACAGCGAGCGGACGATGAGGAAG
TGACCAGCAAAGTAGCAGGCCGCAGCAATCGCGTTGTCCGCACGGAAGCGTCGGCGATAGTGACTACCCA
GCCAGACAAAGTTACTGATAAACAGCAACGAAGCGCCGACAAACGCAGAGAGCGCCGGAGCGGTCGGACG
GAAGAACCACAGTTCACCTGCCAGCCACACCATCACCAGCGTCATGCCGATAAACGTGCAGATAGGCCAA
CGATACTCTTCCAGACGCGTCCAGATAATCGCCAGTAACAGCGCGCCCAGAACCAGCAGCACCAACGGCA
GAGGCCAGAAGAAAGAGAGCGTCATCTGACTGGCGAAATAGATGGTGTACAGCAGGTGCGAGAGGAAAAA
CGCGCCGATGGCGTACATCAGACGTTGACGTGGCAACAGGGTTAGCGCATCGCCCAGCAGTGAGGCACAC
AGCCCCGCCAGCACCAGATAGCTAATGGCGTCGAACATCGGCGCTTGCCAGGCCAGCAACAGCAGGAGAA
GAAGGGTTAACGGTTTAAACACCCAGCGTTGCCAGGTTGGCCCACGATACGATGCATCCACAGATAGCCA
TGCGGAAAGACAGACAGCGATAAACGACCAAAGCATCTTAGTTCCTTGAATTCGTTATTTTTTCGTAAGC
GGAATGCCTACGGTCTTGCTTCCAGTTTAGTGGCGAGGGTGGACGGATGACAACACCATAACTGGCAGGG
TATGCTTATTTCCGCATTTTCCGATGAGGGATAAAGATGAGTAAACCACCTCTTTTCTTTATTGTTATCA
TTGGCTTAATCATCGTCGCCGCATCGTTTCGTTTTATGCAACAACGACGGGAAAAAGCTGATAATGATAT
GGCACCGCTACAGCAAAAGCTGGTGGTGGTGAGCAACAAGCGGGAAAAACCGATTAACGATCGCCGTTCG
CGCCAGCAGGAAGTGACTCCGGCAGGCACCAGTATGCGCTATGAGGCAAGCTTCAAACCGCAAAGCGGAG
GAATGGAGCAGACGTTTCGCCTCGACGCCCAGCAGTACCACGCCCTGACAGTGGGTGATAAAGGTACGCT
GAGCTATAAAGGAACGCGCTTTGTCAGCTTTGTAGGCGAACAATAAGGTTATTTTTTAACTTTAAATTTC
TTCTGCCAGACCAGCAGTTCAAACACGCCGAAAAGGAAAATCCGCACCTTTTCGGCGGTGGTCATCTGCG
GGCCATCTTTCGGTAAAGTGGATTTCAATAGCGCCAGCTGCATACCATGCATCAGCACGGTAAAAATCAG
CGCCACGTTAACGAAAATATTCAGCGGGCGTGGGAAGGGATGCACCAGGTTGAGGATTAAAAATCCCCAA
ACACAGAGCATTAACAAACGACCAATATTAATCAGCATCACTTTCTCCTTGTGCTTCGCGTTGATACAGC
CGATAAGCCACCTGACCCGCCACTTTTTCCCGATGTAATGACCAGTTTGCCGGAACAGTGGGCAGACCGT
TTTCGACTTCGCTTTCGACATAAATCAGGGCTTCGTCAGCCAGCCAGCCGTTATCTTCCAGTAAATTTAT
CGTCTCTTCTAACAAGCCACGGCGGAACGGTGGATCGACAAACACGATATTATGCGGTGTGCCTTTTTGC
GCCAGGAATGACATCGCGTTGCTGTTCACCACGCGTGCATTGCCTGCTTTTAGTGTCGCCAGATTCTTAA
TTAACTGCTGAGAAACCGCACGATCCATCTCAATCAACATGGCCCCCGCAGCGTAGCGCGATAACGCTTC
CAGCCCCAGCGCGCCGCTCCCGGCGAAGCAATCCAGACATTGGGCGTCAACAATGACCGGAGCCAGCCAG
TTAAACAACGTTTCGCGTACGCGGTCGGTGGTGGGGCGCAGACCTGGACTATCAGGAACCGGGAGTTTAC
GGCCTCGCCACTGCCCGCCAATAATGCGGATTTGGCCGCTGCCGGAATGATTCGGTTTTTTCATGATAAA
TTGCTCAATCCGCCAGATAACACATACTTGCAGGCGGTGATGTGAATTAAGTTAAGTGATAGACTATTTC
ATCATTTTTTTAGCTGCTATGTACATAGCGTTAACGCTGTGCCATGAAGCAACAGCGAGGAGTGTAGTCG
CAAATGGCGAAAGAAAAAAAACGTGGCTTTTTTTCCTGGCTGGGCTTTGGTCAAAAAGAGCAGACCCCGG
AAAAAGAGACAGAAGTTCAGAATGAACAACCAGTTGTAGAAGAAATCGTTCAGGCGCAAGAGCCTGTGAA
GGCTTCTGAACACGCCGTTGAAGAGCAGCCGCAGGCGCATACTGAAGCCGAGGCGGAAACTTTTGCTGCC
GACGTTGTGGAAGTTACTGAACAGGTTGCTGAAAGTGAAAAAGCGCAGCCTGAAGCGGAAGTCGTTGCTC
AGCCGGAACCGGTCGTAGAAGAAACGCCGGAGCCAGTGGCTATCGAACGTGAAGAACTGCCGTTGCCGGA
AGACGTCAACGCCGAAGCGGTTTCGCCAGAAGAGTGGCAGGCCGAAGCGGAAACCGTAGAGATTGTCGAA
GCGGCGGAAGAAGAAGCGGCTAAAGAAGAAATCACCGACGAAGAGCCGGAGGCACAGGCGCTGGCTGCCG
AAGCGGCAGAAGAGGCGGTAATGGTGGTTTCTCCGGCAGAAGAAGAGCAGCCGGTGGAAGAAATCGCTCA
GGAGCAGGAAAAACCGACCAAAGAAGGTTTCTTCGCGCGCCTGAAACGCAGCCTGTTAAAAACCAAAGAA
AATCTCGGCTCCGGATTTATCAGCCTGTTCCGCGGTAAAAAAATCGACGATGATCTGTTTGAAGAGCTGG
AAGAACAGCTGTTGATCGCCGATGTGGGCGTGGAAACCACACGTAAAATTATCACCAATCTGACAGAAGG
CGCATCCCGCAAGCAGCTTCGTGATGCCGAGGCGCTCTATGGCCTGCTGAAAGAAGAGATGGGCGAGATT
CTGGCGAAAGTCGATGAGCCGCTGAATGTTGAAGGTAAAACGCCGTTCGTGATCCTGATGGTGGGCGTCA
ACGGTGTGGGTAAAACCACGACGATTGGTAAGCTGGCGCGTCAGTTTGAGCAGCAGGGTAAATCGGTGAT
GCTGGCGGCAGGCGATACTTTCCGTGCGGCAGCGGTTGAACAGCTTCAGGTCTGGGGTCAGCGCAACAAT
ATTCCGGTGATTGCCCAGCATACCGGTGCGGATTCCGCTTCTGTTATCTTCGACGCCATTCAGGCCGCTA
AAGCGCGTAACATCGACGTCCTGATTGCCGATACCGCCGGACGCCTGCAAAACAAATCGCACCTGATGGA
AGAGTTGAAGAAAATCGTCCGCGTGATGAAGAAACTCGACGTTGAAGCTCCGCATGAAGTTATGCTGACC
ATCGATGCCAGCACCGGGCAGAATGCGGTAAGCCAGGCCAAACTGTTCCACGAAGCCGTTGGCTTAACCG
GCATCACGCTAACGAAACTGGACGGCACGGCGAAAGGCGGGGTAATTTTCTCGGTGGCTGACCAGTTTGG
TATCCCTATCCGCTACATTGGTGTCGGCGAACGTATTGAGGATTTGCGTCCGTTTAAGGCGGACGACTTT
ATAGAGGCACTTTTTGCCCGAGAGGATTAACAATGATTCGCTTTGAACATGTCAGCAAGGCTTATCTCGG
TGGGAGACAGGCGCTGCAGGGCGTTACGTTCCATATGCAGCCGGGTGAGATGGCGTTTCTGACCGGTCAT
TCCGGCGCAGGGAAAAGTACCCTCCTGAAGCTGATCTGTGGGATTGAGCGGCCCAGCGCCGGGAAAATCT
GGTTTAGCGGCCATGACATCACGCGTCTGAAAAACCGTGAAGTTCCGTTTCTGCGCCGCCAGATTGGCAT
GATTTTCCAGGATCACCATCTACTGATGGACCGTACTGTCTATGATAACGTGGCGATCCCGCTGATTATC
GCCGGTGCCAGCGGTGATGACATTCGTCGCCGGGTGTCGGCGGCGCTGGATAAAGTCGGGCTACTGGACA
AAGCGAAGAACTTCCCTATTCAGCTTTCCGGCGGTGAACAACAGCGTGTTGGCATTGCCCGCGCGGTGGT
GAACAAGCCCGCGGTACTGCTGGCGGACGAACCGACTGGTAACCTGGACGACGCGCTGTCGGAAGGCATT
TTACGTCTGTTTGAAGAGTTTAACCGCGTTGGGGTAACCGTATTGATGGCAACGCACGACATCAACCTGA
TTTCGCGACGTTCCTATCGTATGCTCACCCTGAGCGATGGTCACTTGCATGGAGGCGTGGGCCATGAATA
AGCGCGATGCAATCAATCATATTCGGCAGTTTGGCGGGCGTCTGGATCGCTTCCGTAAATCGGTCGGCGG
CTCTGGCGACGGCGGTCGTAACGCGCCGAAACGCGCGAAATCCTCGCCAAAACCGGTAAATCGCAAAACC
AACGTTTTCAACGAACAGGTACGCTATGCCTTCCACGGCGCATTGCAGGATCTGAAAAGCAAACCGTTCG
CCACGTTTTTAACGGTGATGGTTATCGCCATCTCCCTGACGCTGCCCAGCGTCTGTTATATGGTGTACAA
AAACGTTAACCAGGCGGCGACGCAATATTATCCGTCACCGCAAATCACTGTTTATCTGCAAAAAACGCTG
GATGATGACGCCGCTGCGGGCGTGGTGGCACAGTTGCAGGCCGAGCAAGGCGTGGAGAAAGTGAATTATC
TTTCTCGTGAAGACGCACTGGGCGAGTTCCGTAACTGGTCTGGTTTTGGTGGTGCGCTGGATATGCTGGA
AGAAAACCCGCTTCCGGCAGTAGCGGTGGTGATCCCGAAACTCGATTTTCAGGGGACGGAGTCACTGAAT
ACGCTGCGTGATCGTATCACGCAGATTAACGGCATTGACGAAGTGCGGATGGATGACAGCTGGTTTGCCC
GCCTGGCGGCGTTGACCGGGCTGGTCGGGCGCGTTTCGGCAATGATCGGCGTATTGATGGTGGCGGCAGT
GTTCCTCGTCATCGGTAACAGTGTGCGCCTGAGTATCTTTGCTCGCCGTGATTCTATTAACGTGCAGAAA
CTGATTGGTGCGACGGATGGTTTCATCCTGCGTCCGTTCCTGTACGGTGGCGCATTGCTGGGATTTTCTG
GCGCATTGTTGTCACTAATTTTGTCAGAAATTCTGGTGCTGCGTTTGTCATCGGCGGTTGCGGAAGTGGC
ACAGGTTTTCGGAACGAAGTTTGATATCAATGGCTTATCGTTCGATGAATGCCTGCTATTGCTGCTGGTA
TGCTCGATGATTGGCTGGGTGGCAGCGTGGCTTGCCACGGTACAACATTTACGCCACTTTACGCCTGAAT
AATAAAAGCGTGTTATACTCTTTCCCTGCAATGGGTTCCGTAGCAGGGAAAGAGACCCCGTTGTCTCTTC
CCGGTATTTCATCTCTATGTCACATTTTGTGCGTAATTTATTCACAGCGTTGCATTGAACTTGTGGATAA
AATCACTGTCTGATAAAACAGTGAATGATAACCTCGTTGCTCTTAAGCTCTGGCACAGTTGTTGCTACCA
CTGAAGCGCCAGAAGATATCGATTGAGAGGATTTGAATGACTGACAAAATGCAAAGTTTAGCCTTAGCCC
CAGTTGGCAACCTGGATTCCTACATCCGGGCAGCTAACGCGTGGCCGATGTTGTCGGCTGACGAGGAGCG
GGCGCTGGCTGAAAAGCTGCATTACCATGGCGATCTGGAAGCAGCTAAAACGCTGATCCTGTCTCACCTG
CGGTTTGTTGTTCATATTGCTCGTAATTATGCGGGCTATGGCCTGCCACAGGCGGATTTGATTCAGGAAG
GTAACATCGGCCTGATGAAAGCAGTGCGCCGTTTTAACCCGGAAGTGGGTGTGCGCCTGGTCTCCTTCGC
CGTTCACTGGATCAAAGCAGAGATCCACGAATATGTTCTGCGTAACTGGCGTATCGTCAAAGTTGCGACC
ACCAAAGCGCAACGCAAACTGTTCTTCAACCTGCGTAAAACCAAGCAGCGTCTGGGCTGGTTTAACCAGG
ATGAAGTCGAGATGGTGGCCCGTGAGCTGGGCGTAACCAGCAAAGACGTACGTGAGATGGAATCACGTAT
GGCGGCACAGGACATGACCTTTGACCTGTCTTCCGACGACGATTCCGACAGCCAGCCGATGGCTCCGGTG
CTCTATCTGCAGGATAAATCATCTAACTTTGCCGACGGTATTGAAGATGATAACTGGGAAGAGCAGGCGG
CAAACCGTCTGACCGACGCGATGCAAGGTCTGGACGAGCGTAGCCAAGATATCATCCGCGCGCGCTGGCT
GGACGAAGACAACAAGTCCACGTTGCAGGAACTGGCTGACCGTTACGGTGTTTCCGCTGAGCGTGTGCGC
CAGCTGGAAAAGAACGCGATGAAAAAATTGCGCGCTGCTATTGAAGCGTAATTTCCGCTATTAAGCAGAG
AACCCTGGATCAGAGTCCGGGGTTTTTGTTTTTTGGGCCTCTACAATAATCAATTCCCCTTCCGGCAAAA
CGCCAATCCCCACGCAGATTGTTAATAAACTGTCAAAATAGCTATTCCAATATCATAAAAATGGGGTATG
TTTTAGCAGAGTATGCTGCTAAAGCACGGGTAGCTACGTATAAAACGAAATAAAGTGCTGCACAACAACA
TCACAACACACGTAATAACCAGAAGAGTGGGGATTCTCAGGATGAACATAAAGGGTAAAGCGTTACTGGC
AGGATGTATCGCGCTGGCATTCAGCAATATGGCTCTGGCAGAAGATATTAAAGTCGCCGTCGTAGGCGCA
ATGACCGGTCCGGTGGCGCAGTACGGTGACCAGGAGTTTACTGGCGCAGAGCAGGCGGTTGCGGATATCA
ATGCTAAAGGTGGTATCAAAGGTAACAAACTGCAAATCGTAAAATATGACGATGCCTGTGACCCGAAACA
GGCGGTTGCGGTGGCGAACAAAGTCGTTAACGACGGCATTAAATACGTGATTGGTCACCTCTGCTCTTCA
TCAACGCAGCCAGCGTCTGACATCTACGAAGACGAAGGCATTTTAATGATCACCCCAGCGGCAACCGCAC
CAGAGCTGACCGCCCGTGGCTATCAGCTGATCCTGCGCACCACCGGCCTGGACTCCGACCAGGGGCCGAC
GGCGGCGAAATATATTCTTGAGAAAGTGAAACCGCAACGCATTGCTATCGTTCACGACAAACAGCAGTAC
GGCGAAGGTCTGGCGCGTGCAGTGCAGGACGGCCTGAAGAAAGGCAATGCTAACGTGGTGTTCTTTGATG
GCATCACCGCCGGGGAAAAAGATTTCTCTACCCTGGTGGCGCGTTTGAAGAAAGAGAATATCGATTTCGT
TTACTACGGCGGTTATCACCCGGAAATGGGGCAAATCCTGCGTCAGGCACGCGCGGCAGGGCTGAAAACT
CAGTTTATGGGGCCAGAAGGCGTGGCTAACGTCTCGCTGTCTAACATTGCGGGCGAATCAGCGGAAGGGC
TGCTGGTGACCAAGCCGAAGAACTACGATCAGGTTCCGGCGAACAAACCGATTGTTGACGCGATCAAAGC
GAAAAAACAGGACCCAAGCGGCGCGTTCGTCTGGACCACCTACGCCGCGCTGCAATCTTTGCAAGCGGGG
CTGAATCAGTCTGACGATCCGGCGGAGATCGCTAAATACCTGAAAGCGAACTCGGTGGATACCGTGATGG
GGCCGCTGACCTGGGATGAGAAAGGCGATCTGAAAGGCTTTGAGTTCGGTGTGTTTGACTGGCACGCCAA
CGGCACGGCGACTGATGCGAAGTAATCATTAATCGGCAACTTTGGGTTGCCGCCAAATTGCTAATATCGA
GTACGTTGCTTCATGCCGGATGCGGCGTAAACGCCTTATCCGGCCTACAAGATTCAAAGAAATCAGTAAG
TTGCAGCACACATTGTAGGCCTGATAAGCGTAGCGCATCAGGCAATATCACTTTTGAAATCAAACTTGAC
GATTAATGCTTCTCCCAGCCACCCTGTTGTGCCGTAAATCCCAGTGCTCGCATAAACGCTGTCATCACGC
CGCGATCTTCCACGCCAGCATCCGCCATCCACCAACATGAAACGCCAGGATTGTTACGCAAAACCTCTTC
CAGCAGATATTGCCCCACACCGCGACGTCGGGTGACTTCCCGCACGCGTAGAGAATCCAGTGCCCCCTCG
GTGCCGCTTAAGGTTACCCGCACGGCAGCGAGCAGGCGCTCGTTAAAACGCGCGGCGTAGATACGGTAGT
TATCGTCAACCTGTAAAGAGGAAGGGGAATACTCCGGCCAGATCTTTTGCAGGTCAATCCGGTCCTGGTC
GCTAAAGTTTTCTAATCGAATGATGGTCAGCTTCATGGGGAACCCGTGTAAATCACAAAAGTGGAACCAG
TGTAGCGAAATAATTTAATCGGAGGCTTTCTCTTTTTTATTTCTTTTGGCAGGTGATTAATTTTTTTTCA
GCAATAATTACAAAGTTAAAACATTAGAGAATGAAAAATATCCAGCATAATCCCCTAAATGGTAGTGAAT
TATTCTGCCCTTTGTACCGTTATTTTATGCTGACAAGGGCGCTTTTTTCTGTTTATCTATCAATAAATTC
AGAATATTATCTGTTCTTAATCGACTGAAAAATAGGGATTTTAATCGCTATCATCACAAAATACTGCGCT
AAACCCTTAATCAGACAGGTAAAAACAGTGCAGTATAAAAAAAGAACAGTCTGATTTGTTAACACATAAG
AACAAAGCAACACAACATCACGAATGGGGATTTTTGACTATGAAACGGAATGCGAAAACGATCATCGCAG
GGATGATTGCACTGACAATTTCACACACCGCTATGGCTGACGATATTAAAGTCGCCGTTGTCGGCGCGAT
GTCCGGCCCGATTGCCCAGTGGGGCGATATGGAATTTAACGGCGCGCGTCAGGCAATTAAAGACATTAAT
GCCAAAGGGGGAATTAAGGGCGATAAACTGGTTGGCGTGGAATATGACGACGCCTGCGACCCGAAACAAG
CCGTTGCGGTCGCCAACAAAATCGTTAACGACGGCATTAAATATGTTATTGGTCATCTGTGTTCCTCCTC
TACCCAACCTGCATCAGATATCTATGAAGACGAAGGTATTCTGATGATCTCGCCGGGAGCGACCAATCCG
GAGCTGACCCAACGCGGTTATCAATACATCATGCGTACTGCCGGGCTGGACTCTTCCCAGGGGCCAACGG
CGGCAAAATACATTCTTGAGACGGTGAAGCCCCAGCGCATCGCCATCATTCACGACAAACAACAGTATGG
CGAAGGGCTGGCACGTTCGGTGCAGGACGGGCTGAAAGCGGCTAACGCCAACGTCGTCTTCTTCGACGGC
ATTACCGCTGGAGAGAAAGATTTCTCCGCGCTGATCGCCCGCCTGAAAAAAGAAAACATCGACTTCGTTT
ACTACGGCGGTTACTACCCGGAAATGGGGCAGATGCTGCGCCAGGCCCGTTCCGTTGGCCTGAAAACCCA
GTTTATGGGGCCGGAAGGTGTCGGTAATGCGTCACTGTCGAACATTGCCGGTGATGCCGCTGAAGGCATG
TTGGTCACCATGCCAAAACGCTATGACCAGGAGCCGACAAACCAGGGCATCGTTGATGCGCTGAAAGCAG
ACAAGAAAGATCCGTCCGGGCCCTATGTCTGGATCACCTACGCGGCGGTGCAATCTCTGGCAACTGCCCT
TGAACGTACTGGCAGCGATGAGCCGCTGGCGCTGGTGAAAGATTTAAAAGCTAACGGTGCAAACACCGTA
ATTGGGCCGCTGAACTGGGATGAAAAAGGCGATCTTAAGGGATTCGATTTTGGTGTCTTCCAGTGGCATG
CCGACGGTTCATCCACGGCAGCCAAGTGATCATCCCACCGTTCGTGAAAAACGGGCGGGTTTAGAAAGGT
TACCTTATGTCTGAGCAGTTTTTGTATTTCTTGCAGCAGATGTTTAACGGCGTCACGCTGGGCAGTACCT
ACGCGCTGATAGCCATCGGCTACACCATGGTTTACGGCATTATCGGCATGATCAACTTCGCCCACGGCGA
GGTTTACATGATTGGCAGCTACGTCTCCTTTATGATCATCGCCGCACTGATGATGCTGGGCATTGATACC
GGCTGGCTGCTGGTGGCGGCGGGATTCGTCGGCGCAATCGTCATTGCCAGCGCCTACGGCTGGAGTATCG
AACGGGTAGCCTATCGCCCGGTGCGCAACTCTAAGCGCCTGATTGCACTCATCTCGGCAATCGGTATGTC
TATCTTCCTGCAAAACTACGTTAGCCTGACCGAAGGTTCGCGCGACGTGGCGCTGCCCAGCCTGTTTAAC
GGTCAGTGGGTAGTGGGTCATAGCGAAAACTTCTCTGCCTCTATTACTACCATGCAGGCGGTTATCTGGA
TTGTCACCTTCCTCGCCATGCTGGCACTGACGATTTTCATTCGCTATTCCCGTATGGGGCGAGCCTGCCG
TGCCTGCGCGGAAGATCTGAAAATGGCGAGCCTGCTTGGCATCAACACCGACCGGGTGATTGCGCTGACC
TTTGTGATTGGCGCGGCGATGGCGGCAGTGGCGGGCGTGCTGCTCGGTCAGTTCTACGGCGTAATTAACC
CCTACATCGGCTTTATGGCCGGGATGAAAGCCTTTACCGCTGCGGTGCTCGGTGGGATTGGCAGCATTCC
GGGGGCGATGATTGGCGGGCTGATCCTGGGGATTGCGGAGGCGCTCTCTTCTGCCTATCTGAGTACGGAA
TATAAAGATGTGGTCTCATTCGCCCTGCTGATCCTGGTGCTGCTGGTGATGCCGACCGGTATTCTGGGGC
GCCCGGAGGTAGAGAAAGTATGAAACCGATGCATATTGCAATGGCGCTGCTCTCTGCCGCTATGTTCTTT
GTGCTGGCGGGCGTCTTTATGGGCGTGCAACTGGAGCTGGATGGCACCAAACTGGTGGTCGACACGGCTT
CAGAGATCCGTTGGCAGTGGGTGTTTATCGGCACGGCGGTGGTCTTTTTCTTCCAGCTTGTGCGGCCTGC
TTTCCAGAAAGGGCTAAAAAGCGTTTCCGGGCCGAAGTTTATTCTGCCCGCGATTGATGGCTCCACGGTG
AAGCAGAAACTGTTCCTCGTGGCGCTGCTGGTGCTTGCAGTGGCGTGGCCATTTATGGTGTCGCGTGGGA
CGGTGGATATCGCCACTCTGACCATGATCTACATTATTCTCGGTCTCGGGCTGAACGTGGTTGTTGGTCT
TTCTGGTCTGCTGGTGCTGGGATACGGCGGCTTTTACGCCATCGGCGCTTACACTTTTGCGCTGCTCAAT
CACTATTACGGTCTGGGCTTCTGGACCTGTCTGCCGATTGCCGGGTTAATGGCGGCGGCGGCGGGCTTCC
TGCTCGGTTTTCCGGTGCTGCGTCTGCGCGGTGACTATCTGGCGATCGTTACCCTCGGGTTCGGCGAAAT
TGTGCGCATATTGCTGCTCAATAACACCGAAATTACCGGCGGACCGAACGGTATCAGTCAGATTCCGAAA
CCGACGCTCTTCGGACTCGAGTTCAGCCGTACCGCCCGTGAAGGCGGCTGGGACACGTTCAGTAATTTCT
TTGGCCTGAAATACGATCCCTCCGATCGCGTCATTTTCCTCTACCTGGTGGCGTTGCTGCTGGTGGCGTT
AAGCCTGTTTGTCATTAACCGCCTGCTGCGGATGCCGCTGGGGCGTGCGTGGGAAGCGTTGCGTGAAGAT
GAAATCGCTTGTCGTTCGCTGGGCTTAAGCCCGCGTCGTATCAAGCTGACTGCCTTTACCATCAGCGCTG
CGTTTGCCGGTTTTGCCGGAACGTTGTTTGCTGCGCGCCAGGGCTTTGTCAGCCCTGAATCCTTCACTTT
TGCCGAATCGGCGTTTGTGCTGGCGATAGTGGTGCTCGGCGGTATGGGCTCGCAGTTTGCAGTGATTCTG
GCGGCTGTTTTGCTGGTGGTATCGCGCGAGTTGATGCGTGATTTCAACGAATACAGCATGTTAATGCTCG
GTGGTTTGATGGTGCTGATGATGATCTGGCGTCCGCAGGGCTTGCTGCCCATGACGCGCCCGCAACTCAA
GCTGAAAAACGGCGCAGCAAAAGGAGAGCAGGCATGAGTCAGCCATTATTATCTGTTAACGGCCTGATGA
TGCGCTTCGGCGGCCTGCTGGCGGTGAACAACGTCAATCTTGAACTGTACCCGCAGGAGATCGTCTCGTT
AATCGGCCCTAACGGTGCCGGAAAAACCACGGTCTTCAACTGCCTGACCGGATTCTATAAACCCACCGGC
GGCACCATTTTACTGCGCGATCAGCACCTGGAAGGTTTACCGGGGCAGCAAATTGCCCGCATGGGCGTGG
TGCGCACCTTCCAGCATGTACGTCTGTTCCGTGAAATGACGGTGATTGAAAACCTGCTGGTGGGACAGCA
TCAGCAACTGAAAACCGGGCTGTTCTCCGGCCTGTTGAAAACACCCTCTTTCCGTCGCGCCCAGAGCGAA
GCGCTCGACCGCGCCGCCACCTGGCTTGAGCGCATTGGTTTGCTGGAACATGCCAACCGTCAGGCGAGTA
ACCTGGCCTATGGTGACCAGCGCCGTCTGGAGATTGCCCGCTGTATGGTAACGCAGCCGGAGATTTTAAT
GCTCGACGAACCGGCAGCAGGTCTTAACCCGAAAGAGACGAAAGAGCTGGATGAGCTGATTGCCGAACTG
CGTAACCATCACAACATCACTATCTTGTTGATTGAACATGATATGAAGCTGGTGATGGGGATTTCAGACA
GAATTTACGTGGTCAATCAGGGGACGCCGCTGGCAAACGGTACACCGGAGCAGATCCGTAATAACCCGGA
CGTGATCCGTGCCTATTTAGGTGAGGCATAAGATGGAAAAAGTCATGTTGTCCTTTGACAAAGTCAGCGC
CCACTACGGCAAAATCCAGGCGCTGCATGAGGTGAGCCTGCATATCAATCAGGGCGAGATTGTCACCCTC
ATTGGCGCGAACGGGGCGGGGAAAACCACCTTGCTCGGCACGTTATGCGGCGATCCGCGCGCCACCAGCG
GGCGAATTGTGTTTGATGATAAAGACATTACCGACTGGCAGACGGCGAAAATCATGCGCGAAGCGGTAGC
GATTGTCCCGGAAGGGCGTCGCGTCTTCTCGCGGATGACGGTGGAAGAGAACCTGGCGATGGGCGGCTTT
TTTGCCGAACGCGACCAGTTCCAGGAGCGCATAAAGTGGGTCTATGAACTGTTTCCGCGTCTGCATGAGC
GCCGTGTTCAGCGAGCGGGCACTATGTCTGGCGGTGAACAGCAGATGCTGGCGATTGGTCGCGCTTTGAT
GAGTAACCCGCGTTTGTTGTTGCTTGATGAGCCATCGCTCGGGCTGGCACCGATTATCATCCAGCAAATT
TTCGACACCATCGAACAACTGCGCGAGCAGGGGATGACCATCTTCCTTGTCGAGCAGAACGCCAACCAGG
CGCTAAAGCTGGCGGATCGCGGCTACGTGCTGGAAAACGGCCATGTAGTGCTCTCCGATACTGGCGACGC
GCTGCTGGCGAATGAAGCGGTGAGAAGTGCGTATTTAGGCGGGTAATAACACGTTGATTGATAAGGAGTC
AAAAGACTCCTTTGAGACAGGTGACAAATGTAAAATTGCCTGATGCGCTGCGCTTATCAGTCCTACTGGG
TGAGTTGCAATATATTGAATTTGCACGATCTTGTAGGCCGGATAAGGCGTTTACGCCGCATCCGGCATGA
AACGATGAGTAATCTGTAGAGTTTGATTCAGACCTTCTATTTTTCCGCTTATCCGTGCCCCATCTCCCAT
TTTCCCTCGCTCGCGCCGTCACCGCCTTGTCATCTTTCTGACACCTTACTATCTTAAAAATGTAACAAAA
TAGTTATTTTTCTGTAATTCGAGCATGTCATGTTACTCCGCGAGCATAAAACGCGTGAATTCGCGCATTC
GGTACAACAAGAGAGATAATCAATGAAACCGTTACGTTATACAGCTTCAGCACTGGCGCTCGGACTGGCT
TTAATGGCAAATGCGCAGGCAGTGACGACCATTCCGTTCTGGCATTCTATGGAAGGGGAACTGGGTAAAG
AGGTGGATTCTCTGGCCCAACGTTTTAACGCCGAAAACCCGGATTACAAAATTGTACCGACCTATAAAGG
CAACTACGAACAGAATTTAAGCGCGGGGATTGCCGCATTTCGTACCGGCAACGCTCCGGCTATTTTGCAG
GTTTATGAAGTTGGCACCGCCACCATGATGGCGTCGAAAGCCATTAAACCGGTGTATGACGTATTTAAAG
AGGCAGGGATTCAATTCGATGAGTCGCAGTTTGTGCCGACGGTTTCCGGTTACTACTCCGACAGCAAAAC
TGGGCACTTACTTTCCCAGCCGTTCAACAGTTCGACCCCCGTTCTCTATTACAACAAAGACGCCTTCAAG
AAAGCAGGATTAGACCCGGAACAACCGCCGAAAACCTGGCAGGATCTGGCGGACTATGCCGCAAAACTAA
AAGCCTCCGGCATGAAGTGCGGCTACGCCAGCGGCTGGCAGGGCTGGATCCAACTGGAAAACTTTAGCGC
CTGGAACGGTCTGCCGTTTGCCAGCAAAAACAACGGTTTTGACGGCACAGACGCGGTGCTTGAGTTCAAC
AAGCCGGAGCAGGTGAAACACATCGCCATGCTCGAAGAGATGAACAAGAAGGGCGATTTCAGCTACGTTG
GGCGTAAGGATGAATCCACCGAGAAGTTCTATAACGGTGATTGCGCGATGACGACCGCCTCTTCCGGTTC
TCTTGCCAACATTCGCGAGTACGCCAAATTTAACTATGGCGTAGGCATGATGCCTTACGACGCCGATGCG
AAAGACGCGCCGCAAAACGCCATTATCGGCGGAGCCAGTCTATGGGTAATGCAGGGTAAAGATAAAGAAA
CCTACACCGGCGTGGCGAAGTTCCTCGACTTCCTCGCAAAACCAGAAAACGCTGCCGAGTGGCATCAGAA
AACCGGTTATCTACCAATCACCAAAGCGGCGTATGACCTGACCCGTGAGCAGGGCTTTTACGAGAAAAAC
CCAGGAGCGGATATTGCCACGCGTCAGATGCTGAACAAGCCACCGTTGCCGTTCACCAAAGGTTTGCGTC
TGGGCAACATGCCGCAGATCCGCGTGATTGTGGATGAAGAGCTGGAGAGCGTGTGGACCGGTAAGAAGAC
ACCACAGCAGGCGCTGGATACTGCCGTTGAGCGTGGGAACCAGTTACTGCGCCGCTTTGAGAAATCGACG
AAGTCTTAATCAGTGTAATGTCGGATGCGTTTCGCTTATCTGACCTGGCATCGCGTGTAGGCCGGATAAG
CGAAGCGCATCCGGCACAGTTCAGGAATTAACTGTAATGTCATCATCCCGTCCGGTGTTCCGCTCGCGCT
GGCTGCCTTATTTGCTGGTCGCGCCGCAGCTCATCATCACCGTTATCTTTTTTATCTGGCCTGCGGGCGA
AGCGTTGTGGTACTCGCTACAAAGCGTCGATCCGTTTGGTTTCTCCAGCCAGTTTGTCGGCCTGGATAAT
TTCGTCACGCTGTTTCATGACAGCTACTATCTCGACGCCTTCTGGACGACGATAAAATTCAGCACCTTTG
TCACCGTCAGCGGTTTGCTGGTATCGCTGTTCTTCGCAGCGCTGGTGGAGTACATCGTGCGCGGCAGTCG
TTTCTATCAAACTTTGATGCTGCTGCCGTATGCCGTGGCTCCCGCCGTTGCCGCCGTATTGTGGATCTTT
CTGTTTAACCCCGGTCGCGGGCTGATCACCCATTTTCTCGCTGAGTTCGGCTACGACTGGAACCACGCGC
AAAACAGCGGTCAGGCGATGTTCCTGGTGGTGTTTGCCTCAGTGTGGAAGCAAATCAGCTACAACTTTCT
GTTCTTCTATGCCGCGCTGCAATCCATCCCCCGTTCGTTGATCGAAGCCGCAGCCATTGATGGGGCAGGG
CCGATTCGCCGCTTCTTTAAGATTGCGCTGCCGCTTATCGCTCCGGTGAGTTTCTTCCTGCTGGTGGTGA
ACCTGGTGTATGCCTTCTTCGACACCTTCCCGGTGATCGACGCCGCCACCTCCGGCGGGCCAGTACAGGC
CACCACGACGCTGATTTATAAGATCTACCGTGAAGGCTTTACCGGACTGGATTTGGCTTCGTCTGCCGCG
CAGTCGGTGGTGTTGATGTTCCTCGTCATCGTGCTGACGGTGGTGCAGTTCCGCTATGTTGAAAGCAAGG
TGCGTTACCAATGATTGAGAACCGTCCGTGGCTGACAATATTCAGCCATACCATGCTGATCCTCGGGATC
GCGGTGATCCTTTTCCCGCTGTACGTGGCGTTTGTCGCGGCGACGCTGGATAAACAAGAAGTCTATGCCG
CACCGATGACGCTAATCCCCGGCACACATCTGCGGGAAAACATCCACAACATCTGGGTAAACGGGGTAGG
CACGAATAGCGCGCCGTTCTGGCGGATGTTGCTTAACAGCTTTGTGATGGCGTTCAGCATTACGCTCGGC
AAAATTACCGTCTCGATGCTCTCGGCATTTGCCATTGTCTGGTTTCGTTTTCCGCTACGTAACCTCTTCT
TCTGGATGATTTTTATCACCCTGATGCTGCCGGTTGAAGTGCGTATCTTCCCGACGGTGGAAGTCATCGC
CAACCTGAAAATGCTCGACAGCTACGCAGGTTTAACGCTGCCGCTGATGGCCTCGGCGACCGCCACGTTT
CTGTTTCGCCAGTTCTTTATGACCCTACCGGATGAACTGGTGGAAGCCGCGCGGATCGACGGCGCGTCGC
CAATGCGTTTATTTTGCGACATCGTTTTTCCGCTGTCCAAAACTAATCTGGCGGCGCTGTTTGTGATCAC
CTTTATTTACGGCTGGAACCAGTATTTGTGGCCGTTGTTGATTATTACCGACGTTGATCTCGGCACCACC
GTGGCAGGGATTAAAGGGATGATCGCCACAGGCGAAGGCACAACGGAATGGAACTCGGTGATGGCGGCGA
TGTTGTTAACCCTGATCCCACCAGTAGTGATTGTTTTAGTGATGCAGCGTGCCTTCGTGCGCGGCCTGGT
CGATAGTGAGAAATAAGATGGCAGGACTGAAATTACAGGCAGTAACCAAAAGCTGGGATGGCAAAACCCA
GGTCATTAAACCGCTGACCCTTGATGTGGCGGATGGCGAATTTATCGTGATGGTCGGGCCGTCTGGCTGC
GGGAAATCGACGTTATTGCGAATGGTGGCCGGACTGGAGCGGGTAACGACGGGCGATATCTGGATCGACC
GCAAGCGTGTCACCGAAATGGAGCCGAAAGATCGCGGGATTGCGATGGTGTTCCAGAACTACGCGCTCTA
TCCGCATATGAGCGTAGAGGAGAACATGGCGTGGGGGCTGAAAATTCGCGGCATGGGCAAGCAACAAATT
GCCGAACGTGTTAAAGAAGCGGCGCGCATTCTGGAGCTGGACGGCCTGCTTAAGCGCCGCCCGCGTGAGC
TTTCCGGCGGTCAGCGCCAGCGTGTGGCGATGGGGCGTGCGATTGTGCGTGAGCCGGCAGTGTTCCTGTT
TGATGAGCCGCTCTCTAACCTCGATGCCAAGTTGCGTGTGCAGATGCGTCTTGAACTGCAACAGCTGCAC
CGTCGCCTGAAAACGACTTCACTCTACGTTACCCACGATCAGGTTGAGGCGATGACGCTCGCCCAGCGAG
TAATGGTGATGAACGGCGGCATCGCCGAACAGATTGGCACGCCAGTTGAAGTGTACGAAAAGCCCGCCAG
CCTGTTTGTGGCGAGTTTTATCGGCAGCCCGGCGATGAACCTACTGGCTGGCCGCGTGAATAACGAAGGT
ACGCATTTCGAACTGGATGGTGGTATTACGCTGCCGCTAAACGGTGGCTACCGTCAGTATGCCGGGCGTA
AAATGACCCTCGGCATTCGCCCGGAACATATAGCGCTAAGCTCGCAGGCAGAAGGTGGTGTGCCGCTGGT
GATGGACACGCTGGAGATCCTCGGCGCAGATAACCTGGCGCACGGACGTTGGGGCGAACAGAAGCTGGTG
GTGCGACTGGCACATCAGGAGCGCCCGACGGCAGGCAGCACGCTGTGGCTGCATCTGCCGGAAAATCAGC
TGCATCTTTTTGATGGTGAAACAGGACAACGAGTATGAGTAACTGGCCTTATCCCCGCATCGTCGCCCAT
CGTGGTGGCGGTAAGCTGGCCCCGGAAAACACCCTGGCAGCAATCGACATCGGGGCAAAATACGGTCATA
AGATGATCGAATTTGACGCAAAGTTATCGAAAGATGGCGAGATCTTCCTGCTCCATGACGACAATCTTGA
ACGCACCAGCAACGGCTGGGGCGTCGCGGGTGAACTGAACTGGCAGGATTTACTGCGCGTGGATGCAGGC
AGTTGGTACAGCAAAGCGTTTAAAGGTGAGCCGCTGCCATTGCTTTCGCAGGTGGCGGAACGTTGTCGCA
AACACGGGATGATGGCGAATATCGAAATCAAACCCACCACTGGCACCGGACCATTAACGGGCAAAACGGT
GGCGTTGGCGGCACGCGAACTGTGGACCGGTATGACGCCGCCGCTGCTGTCATCGTTTGAGATTGATGCT
TTAGAAGCCGCGCAACAGGCAGCACCGGAACTGCCGCGTGGTTTATTGCTTGATGAATGGCGCGACGACT
GGCGAGAATTGACCGCGCGGCTGGGCTGCGTCTCTATTCATCTCAATCATAAGTTGCTCGATAAAGCGCG
AGTGATGCAGTTGAAAGACGCCGGATTACGGATTCTGGTTTATACCGTCAATAAACCCCAGCGCGCGGCA
GAGTTGCTGCGCTGGGGCGTGGATTGCATCTGTACCGATGCGATTGACGTGATTGGTCCGAACTTTACGG
CCCAATAGTTTTCAACGGAATGTCAGGCTGCGGCGTGCTGGGCTGATTCAGCATGTCGCCGTTTCTCCTC
TCCGGCAGCATATGCTGCTGATTCAACGAACTATCCGGATTACGGTTGCTGTTTAACATCCCGCCGTTGG
TGTTGGGCAGCATTTGCTGCCGGGCGGGATTTCGCTCCCCCGGCTGTGACTGCAACACCCGCTGAGAATT
ATTGTTTATCTGGTTTTCTAAATGCTGCTGTTGCAGCTGCGTTTGCGTTTTCAGTTGCTGGTTCAGCATC
CCTTTTTGCTGGATTTGCTGCGTCTGCATTTGAGTTTGCATCCGCTGCTGGCTGGGGATCTGATATCCCG
GCTGGTTAGGGTTGTTCAGAGTATTAATGGGCTGTGCAAAGCCGACAAACGGCAGGAGTGCCGTCAAAAG
CAGAAGTCGTTTCATCGCGTATCCTCCTCTGAAGATATTCTTTAAGTTTACTCGCTTCCCGGCAAAACGA
TGATTAATTCAGAGTTATATACCAGGCTTAGCTGGGGTTGCCCCTTAATCTCTGGAGAATAACGATGATA
AAACCGACGTTTTTACGCCGGGTGGCCATTGCTGCTCTGCTCACAGGAAGTTGTTTTAGTACGGTAGCCG
CGCCACCTGTTTCTTATGGTGTGGAGGAAGATGTCTTCCATCCGGTACGCGCTAAGCAGGGAATGGTGGC
GTCTGTAGATGCTACTGCCACTCAGGTGGGGGTGGATATCCTCAAGGAGGGCGGGAATGCCGTTGATGCT
GCCGTGGCGGTGGGCTACGCGCTGGCAGTAACGCATCCGCAGGCAGGGAATCTGGGCGGCGGTGGTTTTA
TGCTGATCCGCTCGAAAAATGGCAATACCACGGCTATCGATTTCCGCGAAATGGCACCCGCCAAAGCGAC
CCGCGATATGTTCCTCGATGATCAGGGCAACCCGGACAGCAAAAAATCACTCACTTCGCATCTGGCTTCC
GGCACACCCGGTACGGTAGCGGGTTTCTCGTTGGCGCTGGATAAATACGGCACCATGCCGTTGAATAAAG
TGGTGCAACCGGCGTTTAAACTGGCACGCGATGGTTTTATCGTTAACGACGCGCTGGCTGACGATCTCAA
AACCTACGGCAGTGAAGTGCTGCCGAACCACGAAAACAGCAAAGCTATCTTCTGGAAAGAGGGCGAACCG
CTGAAAAAGGGCGACAAGCTGGTGCAGGCGAACCTGGCAAAGAGCCTGAAGATGATTGCCGAAAACGGCC
CGGATGAATTCTACAAAGGCACGATAGCGGAACAGATTGCCCAGGAGATGCAGAAAAACGGTGGCTTGAT
CAGCAAAGAAGATTTAGCGGCATATAAAGCGGTCGAACGCACACCGATAAGCGGCGATTATCGCGGGTAT
CAGGTTTACTCCATGCCACCGCCATCTTCCGGCGGTATTCATATCGTACAAATCCTCAATATTCTGGAAA
ACTTCGATATGCAGAAGTACGGCTTTGGCAGCGCCGACGCGATGCAAATCATGGCAGAAGCTGAGAAATA
CGCCTATGCCGACCGCTCGGAATATCTTGGCGACCCGGATTTTGTCAAAGTACCGTGGCAGGCGCTGACC
AATAAAGCCTATGCCAAATCTATTGCCGATCAAATCGATATCAATAAAGCGAAGCCATCCAGCGAAATTC
GTCCTGGCAAGCTTGCGCCTTATGAGAGTAATCAAACTACCCATTACTCAGTAGTGGATAAAGACGGTAA
CGCCGTGGCGGTGACCTATACGCTGAACACCACCTTCGGTACGGGCATTGTCGCGGGCGAGAGCGGTATT
TTGCTCAATAACCAGATGGATGATTTCTCCGCCAAACCAGGCGTACCGAACGTTTACGGGCTGGTGGGCG
GCGATGCCAACGCCGTCGGGCCGAATAAACGCCCGCTGTCGTCGATGTCACCAACCATTGTGGTCAAGGA
TGGTAAAACCTGGCTGGTCACCGGAAGCCCAGGCGGTAGCCGGATTATCACCACTGTGCTGCAAATGGTA
GTGAATAGCATCGATTATGGAATGAACGTCGCCGAAGCGACCAATGCGCCGCGTTTCCACCATCAGTGGT
TGCCGGACGAGCTGCGTGTCGAAAAAGGGTTTAGCCCGGATACGATCAAGCTGCTGGAAGCAAAAGGTCA
GAAAGTGGCGCTGAAAGAGGCGATGGGCAGTACACAAAGCATTATGGTTGGGCCGGACGGTGAGCTGTAC
GGTGCATCCGACCCACGCTCGGTGGATGATTTAACGGCGGGGTATTAATATCTTAAGCCCTCTCCCGGTA
GGTGAGGGCTTAAATGACAAACGTAGATTGCAAATTCTCTATTTCACCCGCGCCATATAATACGCATCGA
CATATTCACCATTACGCAGCGCGTACTTCTTGCCAGTCCCTTCAATCTCAAAGCCAAATTTTTTATAGAC
CTTAATTGCTGGCGCGTTATCGACGAACACCGTTAGCTCAATACGATCTACCCGCAACCAGTTGTCGCAC
ATTTCAATCATCTCTCGCATCAGGGCGCTGGCGACGCCGCGGTTCTTCCAACGGGAGTCGACACAGATAC
CAAAATCGGCAACATGACTGCGGCGTGGGCGTTGTTGCACGTCAATGGTGAGATGGCCTACGACGATTCC
ATCAATACAGGCGACTAACTGCTTGATGCCAGGGCGAGCGGTGAGTCGTTCCAGCCACATTTGTTCTGAA
GGATGAGGCACCTGTAGCGTGTTGTAATACACCTCCGGCTGGGCGTGAATCTGCCTGATAGCCTCGTAAT
CGCGTGTTTCTGCGTGGCGTATTACTATCTCACTCATTCCTTTGTCCTCTTTGGGGTAAATGTCCCTTTC
AACATCATTGACTTTCAAATGCGAGTCAAATGCATTTTTTTGCAAAAAGTGTTGGACAAGTGCAAATGAG
AATGATTATTATTGTCTCGCGATCAGGAAGACCCTCGCGGAGAACCTGAAAGCACGACATTGCTCACATT
GCTTCCAGTATTACTTAGCCAGCCGGGTGCTGGCTTTTTTTTTGACCTTTCGTTCTCAATTTATCCTCGG
GAAGTGCTTGTGTTCGTTATGCGCACTCCAGTAGGAACCACGTCCGCTTTGCGCTAAGGTGTAAATAACC
ACCTTAAAAAGGACGAAATCATGGTCATTAACTGCGCCTTTATTGGCTTCGGCAAAAGCACCACCCGTTA
CCATCTGCCGTATGTACTTAACCGCAAGGATAGCTGGCATGTCGCGCATATTTTTCGCCGCCATGCGAAG
CCGGAAGAACAGGCCCCCATTTATTCCCATATCCATTTCACCAGCGATCTCGACGAAGTGCTAAACGATC
CCGATGTTAAGCTGGTTGTCGTCTGCACCCACGCGGACAGCCACTTCGAGTACGCGAAGCGCGCGCTGGA
AGCCGGGAAAAATGTGCTGGTCGAAAAACCGTTCACTCCGACAATTGCGCAGGCGAAAGAGCTGTTTGCA
CTGGCGAAAAGCAAAGGGCTGATCGTTACGCCGTATCAGAATCGTCGCTTTGATTCCTGCTTCCTGACAG
CGAAAAAAGCGATTGAAAGCGGCAAGCTGGGAGAGATTGTCGAAGTGGAAAGCCATTTTGACTATTACCG
CCCGGTGGCAGAAACCAAACCGGGGCTACCGCAGGATGGCGCGTTCTATGGCCTTGGTGTGCATACGATG
GACCAGATTATTTCTCTGTTCGGTCGCCCGGATCACGTCGCTTATGACATCCGCAGCCTGCGTAATAAAG
CCAATCCGGACGACACCTTTGAAGCGCAGTTGTTTTATGGCGATCTAAAAGCCATCGTCAAAACCAGCCA
TCTGGTGAAAATCGATTATCCGAAATTTATCGTTCACGGTAAGAAAGGTTCGTTTATTAAATACGGTATC
GACCAGCAGGAAACTAGCCTGAAGGCTAATATTATGCCGGGCGAACCAGGATTCGCAGCGGATGATTCGG
TCGGTGTGCTGGAGTATGTCAATGACGAGGGCGTGACGGTAAGAGAAGAGATGAAGCCAGAGATGGGCGA
TTATGGGCGCGTTTATGATGCGTTGTATCAAACCATTACCAACGGTGCGCCAAATTACGTCAAGGAATCT
GAAGTTCTTACGAATCTGGAAATCCTTGAACGCGGTTTTGAGCAAGCTTCTCCCTCCGCAGTGACTCTCG
CGAGGTAAGTTTGATGGCCCCTCGAATAGTTCAATTTTTTTGAACAGAGGGGTCAATTTTCACCCTCTAT
CATCCCAGGCGGATCGGGTCCACACTAAGCCCATCGAAATCATTCAGGGGGCGAATACAAATGATCTACT
TACGCAAAGCAAATGAACGCGGTCATGCAAATCATGGCTGGCTGGACTCCTGGCATACTTTCTCTTTTGC
CAACTATTACGATCCGAACTTTATGGGCTTCTCTGCGCTGCGCGTGATTAACGACGACGTGATTGAAGCA
GGGCAGGGCTTCGGCACTCACCCGCATAAAGATATGGAAATTTTGACCTACGTGCTGGAAGGTACTGTTG
AGCACCAGGACAGCATGGGCAATAAAGAGCAGGTTCCGACGGGCGAGTTCCAGATTATGAGTGCGGGTAC
GGGTATTCGTCACTCAGAGTACAACCCAAGCAGCACCGAGCGTCTGCATCTGTATCAGATCTGGATCATG
CCTGAAGAAAACGGCATTACGCCGCGTTATGAACAGCGTCGCTTCGATGCCGTGCAGGGCAAACAACTGG
TGCTTTCGCCGGATGCGCGTGATGGTTCATTGAAAGTGCATCAGGATATGGAACTGTATCGTTGGGCGCT
GGTGAAAGATGAGCAGTCGGTGCATCAGATTGCCGCTGAACGCCGCGTCTGGATCCAGGTGGTGAAAGGC
AATGTCACCATTAACGGCGTGAAAGCCTCGACCAGCGATGGTCTGGCAATCTGGGATGAGCAGGCGATTT
CCATCCATGCTGATAGCGACAGTGAAATCCTGCTGTTCGATTTACCGCCAGTCTAAATTTATCTCACAAA
CCTTCCTGAGGAATCGGGAAGGTTGTGATGCGTCCGTGTTAAACTAAGAGAATCTATCTCTTTTGTACCT
TCAGGACGATGAAAAAGAAAAGACCCGTACTTCAGGATGTGGCTGACCGTGTAGGCGTGACCAAAATGAC
GGTCAGCCGTTTTTTACGCAACCCGGAGCAGGTTTCCGTCGCTCTACGCGGCAAGATTGCCGCCGCTCTT
GATGAACTGGGTTATATTCCCAATCGCGCGCCCGATATACTCTCTAACGCCACCAGCCGGGCGATTGGCG
TCCTGTTACCTTCTCTCACCAACCAGGTTTTCGCGGAAGTATTACGCGGAATCGAAAGCGTCACCGACGC
GCACGGTTATCAAACCATGCTGGCGCACTACGGTTATAAACCGGAAATGGAGCAAGAACGCCTCGAATCA
ATGCTCTCATGGAATATCGACGGCCTGATCCTCACCGAACGTACCCACACGCCGCGTACCTTAAAGATGA
TTGAAGTGGCGGGGATTCCGGTGGTGGAGTTGATGGACAGTAAGTCGCCGTGCCTCGATATCGCCGTCGG
TTTTGATAACTTTGAAGCGGCACGCCAGATGACCACCGCCATTATTGCTCGCGGGCATCGCCACATTGCC
TATCTCGGCGCACGCCTCGACGAACGTACTATCATCAAACAGAAGGGATACGAACAGGCGATGCTGGATG
CAGGCCTGGTGCCGTATAGCGTGATGGTTGAGCAATCTTCTTCTTACTCTTCCGGTATTGAACTGATTCG
CCAGGCGCGGCGGGAATATCCGCAGCTGGATGGCGTGTTCTGTACTAATGATGACCTGGCGGTCGGCGCG
GCGTTTGAATGTCAGCGTCTGGGGTTGAAAGTTCCTGACGATATGGCGATTGCCGGTTTCCACGGTCATG
ACATTGGTCAGGTGATGGAGCCACGGCTAGCGAGTGTGCTGACGCCGCGTGAGCGGATGGGCAGCATTGG
CGCTGAGCGCCTGCTGGCGCGTATTCGTGGCGAATCTGTGACACCGAAAATGTTAGATTTAGGTTTCACC
TTGTCACCGGGCGGATCTATTTAAGCCTACAAATTTGAAGTAGCTCACACTTATACACTTAAGGCACGGA
TGGATATTGCTTCTGATATTGTCCGGCTGGACAATGTTACCGATAACAGTTACCCGTAACATTTTTAATT
CTTGTATTGTGGGGGCACCACTTTGAGCACGACTAACCATGATCACCACATTTACGTCTTGATGGGCGTA
TCGGGCAGCGGCAAATCTGCGGTCGCCAGTGAAGTGGCGCATCAACTTCATGCCGCGTTTCTTGATGGCG
ATTTCCTCCATCCGCGCTGCAATATCGAAAAAATGGCGTCTGGCGAACCGCTGAATGACGACGATCGCAA
ACCGTGGTTGCAGGCGCTGAACGACGCCGCGTTTGCTATGCAGCGCACCAATAAAGTATCGCTGATCGTC
TGTTCTGCACTGAAAAAACACTATCGCGACTTGCTGCGTGAAGGTAATCCTAATCTCTCTTTCATCTACC
TGAAAGGCGATTTTGATGTGATTGAAAGCCGCCTGAAAGCGCGCAAAGGCCATTTCTTTAAAACCCAAAT
GCTGGTGACGCAGTTTGAAACGCTGCAGGAGCCGGGTGCGGACGAAACCGATGTACTGGTGGTGGATATT
GATCAACCGCTGGAAGGTGTTGTGGCAAGCACCATTGAGGTTATTAAAAAAGGCAAATAAGTAGTGACTA
CATTAACGCTTGTTTTAACAGCAGTAGGGTCTGTTTTACTGCTGCTGTTTTTAGTCATGAAGGCGCGTAT
GCACGCTTTCCTGGCTTTAATGGTGGTGTCCATGGGGGCTGGCCTTTTTTCCGGTATGCCGCTCGATAAA
ATCGCAGCGACGATGGAAAAAGGGATGGGAGGCACCCTCGGCTTCCTGGCGGTGGTTGTCGCTCTGGGAG
CCATGTTTGGTAAGATCTTACATGAAACCGGCGCGGTCGATCAGATTGCCGTCAAAATGCTCAAATCCTT
CGGTCACAGCCGCGTGCATTATGCTATCGGCCTTGCGGGGCTGGTTTGTGCGCTACCGCTGTTCTTTGAA
GTGGCGATTGTTCTGCTGATTAGCGTTGCTTTCTCAATGGCGCGCCACACCGGCACGAACCTGGTGAAGC
TGGTAATCCCATTATTTGCAGGCGTGGCGGCAGCGGCTGCGTTCCTGGTGCCTGGGCCAGCGCCAATGCT
GCTGGCATCGCAGATGAATGCCGATTTTGGCTGGATGATCCTGATTGGCCTGTGCGCGGCAATTCCGGGA
ATGATTATTGCCGGGCCGCTGTGGGGTAATTTCATCAGCCGCTACGTGGAGTTGCATATTCCTGACGACA
TCAGCGAACCGCATCTCGGCGAAGGCAAAATGCCGTCCTTCGGATTCAGCCTGTCGCTGATCCTGTTGCC
ACTGGTGCTGGTGGGGCTGAAAACCATTGCCGCGCGTTTTGTGCCAGAAGGCTCTACTGCTTACGAATGG
TTCGAGTTTATTGGTCATCCGTTTACCGCGATTCTGGTTGCTTGCCTGGTGGCGATTTACGGTCTGGCAA
TGCGTCAGGGTATGCCAAAAGACAAAGTGATGGAGATTTGCGGTCACGCGCTGCAACCGGCGGGGATCAT
TCTGCTGGTGATTGGTGCGGGCGGCGTGTTCAAACAGGTGCTGGTTGACTCTGGTGTCGGTCCGGCACTG
GGCGAAGCGTTAACCGGCATGGGCCTGCCGATTGCCATCACCTGCTTCGTGCTGGCAGCTGCAGTGCGCA
TCATTCAGGGTTCTGCCACCGTTGCCTGTTTAACGGCGGTGGGATTGGTAATGCCGGTCATTGAACAACT
GAACTACTCCGGTGCGCAAATGGCGGCGCTGTCGATTTGTATCGCCGGTGGTTCGATTGTTGTCAGCCAC
GTTAACGACGCGGGTTTCTGGTTGTTCGGTAAATTTACCGGCGCGACCGAAGCCGAAACGCTTAAAACCT
GGACCATGATGGAAACCATCCTCGGCACTGTCGGTGCCATCGTTGGGATGATTGCGTTCCAGCTGTTGAG
TTAAGTTTGTTTACCCGGTAGTTCTGACGCTACCGGGCTCTTTTCGAAAAACTCTCCTCGTTACCCCTTC
ATCCACATTCGAATGCCGTCGAGGAACATCTGAGTTGCCATCATCACCAGAATTAATCCCATCAGGCGTT
CAAGTGCGTTCACCCCTTTCTCGCCCAGCAGACGTAAAAATAGCGAAGACTGTAGCAGGATGACAAAGGT
GCCGCCCCAGGCCAGTAGCAGAGCAATTACCAGATGCCCCATCTGATTCGGGTACTGATGAGACAACAAC
ATCAGCGTGGCGAGAATAGTCGGCCCGGCGACTAACGGAATTGCCAACGGCACGATAAATGGCTCTTCAC
CTGCCGGAAGCCCGCTGCTATTTCCTGAAGCGCTGGGGAAAATCATCTTAATGGCGATCAGAAACAGAAT
GATGCCGCCAGAAATGGAGACGGTTTCTGCCCGCAGGCTAAGAAATGCCAGAATTTTCTCGCCCGCAAAC
AGGAACACCAGCATCACAAGGAGAGCAATAAGCAACTCTCGCACCATGATTGCCCGCCGTCTTTTCGGTT
CAGTATGTTTCAGTACGGACATGAAAATAGGTAGGTTTCCGAGCGGATCCATAATCAGGATCAATAAAAC
TGTTGCAGAAATGATTTCATTCATAACTCAAATTCCCTGATAATTGCCGCGGACTTTCTGCGTGCTAACA
AAGCAGGATAAGTCGCATTACTGATGGCTTCGCTATCATTGATTAATTTCACTTGCGACTTTGGCTGCTT
TTTGTATGGTGAAAGATGTGCCAGGAGGAGACCGGCACATTTATACAGCACACATCTTTGCAGGAAAAAA
CGCTTATGAAAAATGTTGGTTTTATCGGCTGGCGCGGTATGGTCGGCTCCGTTCTCATGCAACGCATGGT
TGAAGAGCGCGACTTCGACGCCATTCGCCCTGTCTTCTTTTCTACTTCTCAGCTTGGTCAGGCTGCGCCG
TCTTTTGGCGGAACCACTGGCACACTTCAGGATGCCTTTGATCTGGAGGCGCTAAAGGCCCTCGATATCA
TTGTGACCTGTCAGGGCGGCGATTATACCAACGAAATCTATCCAAAGCTTCGTGAAAGCGGATGGCAAGG
TTACTGGATTGACGCAGCATCATCTCTGCGCATGAAAGATGACGCCATCATCATTCTTGACCCCGTCAAT
CAGGACGTCATTACCGACGGATTAAATAATGGTATCAGGACTTTTGTTGGCGGTAACTGTACCGTAAGCC
TGATGTTGATGTCGCTGGGTGGTTTATTCGCCAATGATCTTGTTGATTGGGTGTCCGTTGCAACCTACCA
GGCCGCTTCCGGCGGTGGTGCGCGACATATGCGTGAGTTATTAACCCAAATGGGCCATCTGTATGGCCAT
GTGGCAGATGAACTCGCGAACCCGTCTTCTGCTATTCTCGATATCGAACGCAAAGTCACAACCTTAACCC
GTAGCGGTGAGCTGCCGGTAGATAACTTTGGCGTGCCGCTGGCGGGTAGCCTGATTCCGTGGATCGACAA
ACAGCTTGATAACGGTCAGAGCCGCGAAGAGTGGAAAGGGCAGGCGGAAACCAACAAGATCCTCAACACA
TCTTCCGTAATTCCGGTAGATGGTTTATGTGTGCGTGTCGGGGCATTGCGCTGCCACAGCCAGGCATTCA
CTATTAAATTGAAAAAAGATGTGTCTATTCCGACCGTGGAAGAACTGCTGGCTGCGCACAATCCGTGGGC
GAAAGTTGTTCCGAACGATCGGGAAATCACTATGCGTGAGCTAACCCCAGCTGCCGTTACCGGCACGCTG
ACCACGCCGGTAGGCCGTCTGCGTAAGCTGAATATGGGACCAGAGTTCCTGTCAGCCTTTACCGTGGGCG
ACCAGCTGCTGTGGGGGGCCGCGGAGCCGCTGCGTCGGATGCTTCGTCAACTGGCGTAATCTTTATTCAT
TAAATCTGGGGCGCGATGCCGCCCCTGCTAGTGCGTAATACAGGAGTAAGCGCAGATGTTTCATGATTTA
CCGGGAGTTAAATAGAGCATTGGCTATTCTTTAAGGGTGGCGGAATACACGAGTATTCACAGCCTTACCT
GAAGTGAGGACGACGCAGAGAGGATGCACAGAGTGCTGCGCCGTTCAGGTCAAAAAAATGTCACAACCAG
AAGTCAAAAATTCAGTTGGATGGGGTGACACAATAAAACAGGAAGACAAGCATGTCCGATCGTATCGATA
GAGACGTGATTAACGCGCTAATTGCAGGCCATTTTGCGGATCCTTTTTCCGTACTGGGGATGCATAAAAC
CACCGCGGGACTGGAAGTCCGTGCCCTTTTACCCGACGCTACCGATGTGTGGGTGATTGAACCGAAAACC
GGGCGCAAACTCGCAAAACTGGAGTGTCTCGACTCACGGGGATTCTTTAGCGGTGTCATTCCGCGACGTA
AGAATTTTTTCCGCTATCAGTTGGCTGTTGTCTGGCATGGTCAGCAAAACCTGATTGATGATCCTTACCG
TTTTGGCCCGCTAATCCAGGAAATGGATGCCTGGCTATTATCTGAAGGTACTCACCTACGTCCGTATGAA
ACCTTAGGCGCGCATGCAGATACTATGGATGGCGTCACAGGTACGCGTTTTTCTGTCTGGGCTCCAAACG
CCCGTCGGGTCTCGGTGGTTGGGCAATTCAACTACTGGGACGGTCGCCGTCATCCGATGCGCCTGCGTAA
AGAGAGCGGAATCTGGGAACTGTTTATCCCTGGGGCGCATAACGGTCAGCTCTATAAATACGAGATGATT
GATGCCAATGGCAACTTGCGTCTGAAGTCCGACCCTTATGCCTTCGAAGCGCAAATGCGCCCGGAAACCG
CGTCTCTTATTTGCGGGCTGCCGGAAAAGGTTGTGCAGACTGAAGAGCGCAAAAAAGCGAATCAGTTTGA
TGCGCCAATCTCTATTTATGAAGTTCACCTGGGCTCCTGGCGTCGTCACACCGACAACAATTTCTGGTTG
AGCTACCGCGAGCTGGCCGATCAACTGGTGCCTTATGCTAAATGGATGGGCTTTACCCATCTCGAGCTAC
TGCCCATTAACGAGCATCCCTTCGATGGCAGTTGGGGTTATCAGCCAACCGGCCTGTATGCACCGACCCG
CCGTTTTGGTACTCGCGACGACTTCCGTTATTTCATTGATGCCGCACACGCAGCTGGTCTGAACGTGATT
CTCGACTGGGTGCCAGGCCACTTCCCGACCGATGACTTTGCGCTTGCCGAATTTGATGGCACGAACTTGT
ATGAACACAGCGATCCGCGCGAAGGCTATCATCAGGACTGGAACACGCTGATCTACAACTATGGTCGCCG
TGAAGTCAGTAACTTCCTTGTCGGTAACGCGCTTTACTGGATTGAACGTTTTGGTATTGATGCGCTGCGC
GTCGATGCGGTAGCGTCAATGATTTATCGCGACTACAGCCGTAAAGAGGGGGAGTGGATCCCGAACGAAT
TTGGCGGTCGCGAGAATCTTGAAGCGATTGAATTCTTGCGTAATACCAACCGTATTCTTGGTGAGCAGGT
TTCCGGTGCAGTGACAATGGCGGAGGAGTCTACCGATTTCCCTGGCGTTTCTCGTCCGCAGGACATGGGC
GGTCTGGGCTTCTGGTACAAGTGGAACCTAGGCTGGATGCATGACACCCTGGACTACATGAAGCTCGACC
CGGTTTATCGTCAGTATCATCACGATAAACTGACCTTCGGGATGCTCTACAACTACACTGAAAACTTCGT
CCTGCCGTTGTCGCATGATGAAGTGGTCCACGGTAAAAAATCGATTCTCGACCGGATGCCGGGCGACGCA
TGGCAGAAATTCGCTAACCTGCGCGCCTACTACGGCTGGATGTGGGCATTCCCGGGCAAGAAACTACTGT
TCATGGGGAACGAATTTGCCCAGGGCCGCGAGTGGAACCATGACGCCAGCCTCGACTGGCATCTGTTGGA
AGGCGGCGATAACTGGCACCACGGTGTCCAGCGTCTGGTGCGCGATCTGAACCACACCTACCGCCACCAT
AAAGCAATGCATGAACTGGATTTTGACCCGTACGGCTTTGAATGGCTGGTGGTGGATGACAAAGAACGCT
CGGTGCTGATCTTTGTGCGTCGCGATAAAGAGGGTAACGAAATCATCGTTGCCAGTAACTTTACACCGGT
GCCGCGTCATGATTATCGCTTCGGTATTAACCAGCCGGGTAAATGGCGTGAAATCCTCAATACCGATTCC
ATGCACTATCACGGCAGTAATGCAGGCAATGGCGGCGCAGTACACAGCGATGAGATTGCCAGCCACGGTC
GTCAGCATTCACTGAGCCTGACGCTACCACCTCTGGCCACTATCTGGCTGGTTCGGGAGGCAGAATGACA
CAACTCGCCATTGGCAAACCCACTCCCCTCGGCGCGCATTACGACGGTCAGGGCGTCAACTTCACACTTT
TCTCCGCTCATGCCGAGCGGGTAGAGCTGTGTGTCTTTGATGCCAATGGCCAGGAACATCGCTATGACTT
GCCAGGGCACAGTGGCGACATTTGGCACGGTTATCTGCCGGATGCGCGCCCGGGTTTGCGTTATGGTTAT
CGCGTTCATGGCCCCTGGCAACCCGCCGAGGGGCATCGCTTTAACCCGGCGAAGTTGTTGATTGATCCTT
GCGCGCGGCAAATTGACGGGGAGTTTAAAGATAACCCGCTGCTGCACGCCGGTCATAATGAACCTGACTA
TCGCGACAACGCCGCCATTGCGCCGAAATGCGTAGTGGTGGTTGATCACTATGACTGGGAGGATGATGCC
CCGCCGCGCACGCCGTGGGGCAGCACCATCATTTATGAAGCCCATGTCAAAGGATTAACGTATCTGCACC
CGGAGATCCCGGTCGAGATCCGTGGCACTTATAAAGCCCTGGGGCATCCGGTGATGATCAACTATTTGAA
ACAGTTGGGCATTACAGCGCTGGAACTGCTGCCGGTGGCACAATTTGCCAGCGAACCACGTCTGCAACGT
ATGGGGCTTAGTAACTACTGGGGTTACAACCCGGTGGCGATGTTTGCGCTGCATCCGGCGTATGCCTGCT
CGCCAGAAACGGCGCTGGATGAGTTTCGCGATGCAATCAAAGCACTGCATAAAGCGGGTATCGAAGTCAT
TCTTGATATCGTGCTCAACCATAGTGCGGAACTGGACCTCGACGGCCCGTTATTCTCGCTGCGTGGGATC
GACAACCGTAGCTATTATTGGATAAGAGAAGACGGCGATTATCACAACTGGACCGGTTGTGGTAACACGC
TCAATTTGAGTCATCCGGCGGTGGTAGATTATGCCAGCGCCTGCCTGCGTTATTGGGTAGAAACCTGCCA
CGTCGATGGTTTCCGCTTTGATCTGGCGGCAGTCATGGGCCGTACGCCAGAGTTTCGTCAGGATGCGCCG
TTGTTTACCGCTATCCAGAACTGCCCGGTGCTCTCGCAGGTGAAGTTAATTGCTGAACCGTGGGATATCG
CTCCTGGTGGTTATCAGGTGGGAAATTTCCCGCCGCTGTTTGCCGAGTGGAACGATCATTTCCGCGATGC
AGCCCGTCGTTTCTGGCTGCATTATGATTTACCTCTGGGAGTGTTTGCCGGGCGTTTTGCTGCCTCCAGC
GATGTTTTTAAACGTAATGGTCGTCTGCCGAGTGCCGCGATTAATCTCGTCACCGCGCATGACGGTTTTA
CGCTTCGCGACTGCGTTTGCTTCAACCATAAACACAATGAAGCAAACGGAGAAGAAAATCGCGACGGGAC
CAACAACAATTACAGTAACAATCATGGTAAAGAAGGGTTAGGCGGTACTCTTGATCTGGTTGAACGGCGG
CGCGACAGCATTCACGCCCTGTTAACAACGTTGTTGCTCTCCCAGGGTACGCCGATGTTACTGGCCGGTG
ACGAACATGGTCACAGCCAGCATGGCAATAACAATGCCTACTGTCAGGATAACCAATTAACCTGGTTGGA
CTGGTCGCAGGCAAGCAGTGGTTTAACCGCATTTACCGCCGCGTTAATCCATCTGCGCAAGCGCATTCCC
GCTTTGATGGAGAATCGCTGGTGGGAAGAAGGCGACGGCAATGTCCGTTGGCTAAATCGATATGCTCAAC
CTTTAAGCACGGATGAGTGGCAAAACGGGCCGAAACAGCTGCAAATTCTGCTCTCGGATCGCTTTTTGAT
CGCAATTAACGCCACGCTTGAGGTAACAGAGATTGTTTTACCTGCTGGGGAGTGGCACGCCATTCCCCCA
TTCGCTGGAGAGGATAACCCAGTGATTACGGCTGTCTGGCAGGGACCTGCACACGGATTGTGTGTGTTCC
AGAGATGATAAAAAAGGAGTTAGTCATGGTTAGTTTAGAGAAGAACGATCACTTAATGTTGGCGCGCCAG
CTGCCATTGAAATCTGTTGCCCTGATACTGGCGGGAGGACGTGGTACCCGCCTGAAGGATTTAACCAATA
AGCGAGCAAAACCGGCCGTACACTTCGGCGGTAAGTTCCGCATTATCGACTTTGCGCTGTCTAACTGCAT
CAACTCCGGGATCCGTCGTATGGGCGTGATCACCCAGTACCAGTCCCACACTCTGGTGCAGCACATCCAG
CGCGGCTGGTCATTCTTCAATGAAGAAATGAACGAGTTTGTCGATCTGCTGCCAGCACAGCAGAGAATGA
AAGGGGAAAACTGGTATCGCGGCACCGCAGATGCGGTCACCCAAAACCTCGACATTATCCGCCGTTATAA
AGCGGAATACGTGGTGATCCTGGCGGGCGACCATATCTACAAGCAAGACTACTCGCATATGCTTATCGAC
CACGTCGAAAAAGGCGCACGTTGCACCGTTGCTTGTATGCCAGTACCGATTGAAGAAGCCTCCGCGTTTG
GCGTTATGGCGGTTGATGAGAACGATAAAATTATCGAATTCGTTGAAAAACCAGCTAACCCGCCGTCAAT
GCCGAACGATCCGAGCAAATCTCTGGCGAGTATGGGTATCTACGTCTTTGACGCCGACTATCTGTATGAA
CTGCTGGAAGAAGACGATCGCGATGAGAACTCCAGCCACGACTTTGGCAAAGATTTGATTCCCAAGATCA
CCGAAGCCGGTCTGGCCTATGCGCACCCGTTCCCGCTCTCTTGCGTACAATCCGACCCGGATGCCGAGCC
GTACTGGCGCGATGTGGGTACGCTGGAAGCTTACTGGAAAGCGAACCTCGATCTGGCCTCTGTGGTGCCG
GAACTGGATATGTACGATCGCAATTGGCCAATTCGCACCTACAATGAATCATTACCGCCAGCGAAATTCG
TGCAGGATCGCTCCGGTAGCCACGGGATGACCCTTAACTCACTGGTATCCGGCGGTTGTGTGATCTCCGG
TTCGGTGGTGGTGCAGTCCGTTCTGTTCTCGCGCGTTCGCGTGAATTCATTCTGCAACATTGATTCCGCC
GTATTGTTACCGGAAGTATGGGTAGGTCGCTCGTGCCGTCTGCGTCGCTGCGTCATCGATCGTGCTTGTG
TTATTCCGGAAGGCATGGTGATTGGTGAAAACGCAGAGGAAGATGCACGTCGTTTCTATCGTTCAGAAGA
AGGCATCGTGCTGGTAACGCGCGAAATGCTACGGAAGTTAGGGCATAAACAGGAGCGATAATGCAGGTTT
TACATGTATGTTCAGAGATGTTCCCGCTGCTTAAAACCGGCGGTCTGGCTGATGTTATTGGGGCATTACC
CGCAGCACAAATCGCAGACGGCGTTGACGCTCGCGTACTGTTGCCTGCATTTCCCGATATTCGCCGTGGC
GTGACCGATGCGCAGGTAGTATCCCGTCGTGATACCTTCGCCGGACATATCACGCTGTTGTTCGGTCATT
ACAACGGGGTTGGCATATACCTGATTGACGCGCCGCATCTCTATGATCGTCCGGGAAGCCCGTATCACGA
TACCAACTTATTTGCCTATACCGACAACGTATTGCGTTTTGCGCTGCTGGGGTGGGTTGGGGCAGAAATG
GCCAGCGGGCTTGACCCATTCTGGCGTCCTGATGTGGTGCATGCGCACGACTGGCATGCAGGCCTTGCGC
CTGCGTATCTGGCGGCGCGCGGGCGGCCGGCGAAGTCGGTGTTTACTGTGCACAACCTGGCCTATCAAGG
CATGTTTTATGCACATCACATGAATGACATTCAATTGCCATGGTCGTTCTTTAATATTCATGGGCTGGAA
TTCAACGGACAAATCTCTTTCCTGAAGGCCGGTCTGTACTATGCCGATCACATTACGGCAGTCAGCCCAA
CCTACGCTCGCGAGATCACCGAACCGCAGTTTGCCTACGGTATGGAAGGTCTGTTGCAACAGCGTCACCG
TGAAGGGCGTCTTTCCGGCGTACTGAACGGCGTGGACGAGAAAATCTGGAGTCCAGAGACGGACTTACTG
TTGGCCTCGCGTTACACCCGCGATACGTTGGAAGATAAAGCGGAAAATAAGCGCCAGTTACAAATCGCAA
TGGGGCTTAAGGTTGACGATAAAGTGCCGCTTTTTGCAGTGGTGAGCCGTCTGACCAGCCAGAAAGGTCT
CGACCTGGTGCTGGAAGCCTTACCTGGTCTTCTGGAGCAGGGCGGGCAGCTGGCGCTACTCGGCGCGGGC
GATCCGGTGCTGCAGGAAGGTTTCCTTGCGGCGGCAGCGGAATACCCCGGCCAGGTGGGCGTTCAGATTG
GCTATCACGAAGCATTTTCGCATCGCATTATGGGCGGCGCGGACGTCATTCTGGTGCCCAGCCGTTTTGA
ACCGTGCGGCTTAACGCAACTTTATGGATTGAAGTACGGTACGCTGCCGTTAGTTCGGCGCACTGGTGGG
CTTGCTGATACGGTTTCTGACTGTTCTCTTGAGAACCTTGCAGATGGCGTCGCCAGTGGGTTTGTCTTTG
AAGATAGTAATGCCTGGTCGCTGTTACGGGCTATTCGACGTGCTTTTGTACTGTGGTCCCGTCCTTCACT
GTGGCGGTTTGTGCAACGTCAGGCTATGGCAATGGATTTTAGCTGGCAGGTCGCGGCGAAGTCGTACCGT
GAGCTTTACTATCGCTTGAAATAGTTTTCAGGAAACGCCTATATGAATGCTCCGTTTACATATTCATCGC
CCACGCTTAGCGTAGAAGCTCTTAAGCACTCTATCGCTTACAAGCTGATGTTTACGATTGGAAAGGATCC
GGTCGTCGCCAATAAACATGAATGGCTGAACGCAACGTTATTTGCTGTGCGCGATCGTCTCGTGGAGCGC
TGGTTACGTTCAAACCGTGCCCAGTTGTCGCAAGAAACTCGTCAGGTTTACTACCTGTCGATGGAGTTTT
TGATTGGCCGTACGCTCTCCAACGCCATGTTGTCGCTAGGAATTTACGAAGATGTACAGGGCGCACTGGA
AGCAATGGGATTAAATCTCGAAGAGCTGATTGATGAAGAAAATGACCCGGGCCTCGGTAACGGTGGCCTG
GGCCGTCTGGCGGCTTGCTTCCTCGATTCTCTGGCGACGTTAGGGCTGCCGGGGCGCGGTTACGGCATCC
GCTATGACTACGGTATGTTCAAGCAAAACATCGTTAACGGTAGCCAGAAAGAGTCGCCTGACTACTGGCT
GGAATACGGTAACCCGTGGGAATTCAAACGCCACAACACGCGCTATAAAGTCCGTTTTGGCGGTCGCATT
CAGCAGGAAGGTAAAAAAACGCGCTGGATTGAAACCGAAGAGATTCTGGGAGTAGCTTACGATCAGATAA
TCCCAGGTTACGACACTGACGCGACCAACACGCTGCGTTTGTGGAGTGCCCAAGCCAGTAGCGAAATTAA
CCTCGGTAAATTCAACCAGGGCGACTACTTCGCGGCAGTGGAAGATAAAAACCACTCCGAGAACGTATCT
CGCGTACTGTATCCGGATGACTCCACCTACTCCGGACGTGAGCTGCGACTGCGTCAGGAATACTTCCTGG
TTTCCTCGACCATTCAGGACATTTTAAGCCGCCATTATCAGTTGCATAAAACCTACGATAACCTGGCGGA
TAAAATTGCGATTCACCTCAACGATACCCATCCGGTGCTGTCGATTCCTGAGATGATGCGTCTGCTGATC
GATGAGCACCAATTTAGCTGGGACGACGCGTTCGAAGTGTGTTGTCAGGTCTTCTCCTACACCAACCACA
CGCTAATGAGCGAGGCGCTGGAAACCTGGCCAGTCGATATGCTGGGTAAAATTCTGCCGCGTCACCTGCA
GATCATCTTTGAAATCAACGACTATTTCCTGAAAACCTTGCAGGAACAGTATCCGAACGATACCGATCTG
CTGGGACGGGCGTCGATCATTGATGAATCCAACGGTCGTCGTGTGCGTATGGCCTGGCTGGCGGTTGTGG
TGAGCCACAAAGTTAACGGTGTATCGGAGCTGCACTCTAACCTGATGGTGCAATCGCTATTTGCTGACTT
TGCGAAAATCTTCCCGGGTCGTTTCACCAACGTCACCAACGGTGTGACGCCGCGTCGCTGGCTGGCGGTA
GCGAACCCATCGCTTTCAGCCGTGTTGGACGAACACCTGGGCCGCAACTGGCGCACCGACCTTAGCCTGC
TTAATGATCTGCAACAACACTGTGATTTCCCAATGGTTAATCACGCGGTGCATCAGGCGAAGCTGGAGAA
CAAAAAGCGTCTGGCGGAGTATATCGCCCAGCAGCTGAATGTGGTGGTAAATCCGAAAGCGCTGTTCGAT
GTGCAAATCAAACGTATTCACGAATACAAACGTCAATTGATGAATGTGTTGCACGTGATCACCCGCTATA
ACCGCATCAAGGCCGACCCAGATGCGAAGTGGGTACCGCGCGTGAATATTTTTGGCGGTAAGGCGGCTTC
GGCCTATTACATGGCGAAGCACATTATTCATTTGATCAATGACGTAGCGAAAGTGATCAACAACGATCCG
CAGATTGGCGACAAGCTGAAAGTCGTGTTCATCCCGAACTACAGTGTTAGCCTGGCGCAGTTGATCATTC
CGGCGGCCGATCTATCTGAACAGATTTCGCTGGCGGGGACGGAGGCTTCCGGCACCAGTAACATGAAGTT
TGCGCTTAACGGCGCGCTGACTATCGGTACGCTGGACGGTGCGAATGTCGAGATGCTGGATCATGTCGGT
GCTGACAATATCTTTATCTTTGGTAACACAGCGGAAGAAGTGGAAGAACTGCGTCGTCAGGGCTACAAAC
CGCGTGAATACTACGAGAAAGATGAGGAGCTGCATCAGGTGCTGACGCAAATCGGCAGCGGTGTATTCAG
TCCGGAAGATCCGGGTCGCTATCGCGATCTGGTTGATTCGCTGATCAACTTCGGCGATCACTACCAGGTA
CTGGCGGATTATCGCAGCTATGTCGATTGTCAGGATAAAGTCGACGAACTCTACGAGCGTCAGGAAGAGT
GGACCGCAAAAGCGATGCTGAACATTGCCAATATGGGCTACTTCTCTTCTGACCGTACGATCAAAGAGTA
CGCCGATCATATCTGGCATATTGATCCGGTGAGATTGTAAGTTCGCTAAAAAACAGAACGGGGCCAAAAG
GTCCCGTTTTTTTTTCGCCTTTATTTAGGAAAAGTGTCCAGAGGGGGCGAGGGTTATCGGGGAGTATAAT
TTCGCCATTCAGCAAGAATGGAAAGAATAATGCAAAACGGAAAATGGATTTTGACCTCGCTGGTAATGAC
TTTTTTTGGCATCCCCATACTGGCGCAATTTTTGGCAGCGGTTGTTGCCATGCTGGGGGCCGGGCTTGCC
GCTATTCTTGAGGTTTGCAATTTACTCTTTACGCCAACAATTTATCTTCTACTCAACGTCTTTATGCTGA
CGCTGGGGGCGATAATCATATTTTTCTCTGGTCGCGTGTGGGCTGGTGATAGCGCACCAGAAAAAAGAGA
AATAGCCGCCTGGCGACAATGCTTTTTTCTCTTACCCGCGCTATTAACCTTGGTTGGCTGGATAATCGCG
CTACATCTGGCAGATTATCAATTTCGCCAGATGGGAGCCGGTTGGTTGGCAAACCTTATGCTTCCCTGGT
TGGGCGTTTTTACAGTCTCATTCGTCGGTGGTGAGTACTGGTGGATAGTCATTATTCCCGTTGGCGCGCA
TATCAGTTTTTCACTGGGATACGGCTGGCTGACCAGACATCCTTTAACCGGCACCTCCGGTCTACGTTGC
CGTAATTTACTTCTGTTCATTCTTCTCTTACTGGGTATTGTCGCTGGTTATCAGGCTTATTTATATAAAC
AGCTTAATCCCGGCGTCGGTGTGCGTGAAAATATTGATACCTGGGCCTGGCGACCCGATAAACTTTATAA
TCAACTGACGCCACTGCGTGGTAAACCACAAATTCAATTTACGCAAAACTGGCCGCGAAGCGATGGCGCT
ACGGCAGCGTATCCGCTTTATGCCTCTGCATTTTATGCACTAAGCGTTATACCGGAAGATTTTCATTCCT
GGGAATATCTGACGAACTCTCGAACACCAGAAGCGTATAACAGGATCGTTAACGGTGATGCCGATATTAT
TTTCGTGGCGCAACCTTCCGATGGGCAAAAAAAACGCGCTGAGAAATCGGGCGTCACTTTGCTGTACACG
CCATTTGCCCGTGAAGCGTTTGTTTTCATCGTCAATGCGGATAATCGGTTAATTCCCTGACTGAACAACA
AGTGTGTGACATTTTTAGTGGCGAAATTACCAACTGGCGCACGGTTGGCGGTAAGGATCAGGAGATCCAG
ACCTGGCAACGCCCGGAAGACTCTGGCAGCCAGACAGTGATGCAATCACAGGTCATGAAAAATGTCCGCA
TGATCTCGCCGCAGGAAACCGAAGTGGCAAGCATGATGGAGGGAATGATTAAAGTCGTTGCCGAATACCG
TAATACAAACAACGCAATAGGCTACACCTTCCGCTATTACGCAACACAAATGAATGCCGATAAAAATATA
AAACTGCTAGCGATTAACGGTATTGCACCGACTGTGGAAAATATTCGCAACGACAAATATCCCTATATAG
TCGATGCCTTAATGGTAACGCGGGAAAATACGACGTCAGAGACACAAAAATTGGTGGAGTGGTTTTTAAC
ACCGCAGGGGCAGAGTTTGGTGGAAGATGTGGGCTATGTGCCGATGGATAAAACGTTGCATTAAGCAGGA
TTACAATATGGATATCATTAATATTTTCCTGAACGCGGCGAATGCCCTTTTTAGCTATCAGCCGTTTATG
CACGATCAGCGGGCGAGGGAGTAATTATGCACCCCACTCCTGCCATGCAGGCATTAATTGAGCAGATATA
TCATATTTTTCGTCGTTATCCGGCGCCGCAGCAATTTGTGGTTTGTTGTGAATATTGTCTGAGTCAACAG
GAACAAAAAGCATTACGGAATACATCGTTGCGAGCGATTCCTTATTCCTTAATCAATGCCTGGAATAGTA
GTCCAGGACCTGATCCGCAAAACAGCGATGAGGTTCGTTATTTTCTGCCTCGTTTACTGGAGTTTGTTGC
GCAGGGGCAATTTGACAATATTCACGAAGTATTTTTTCTACGGCGTATCAACCTTGCCAGTAAAGAAAAC
TGGCGTGAGGATGAACGGGAAATATTGCAGCAATTTGCTTGCCAGTATATGACTGATTGGGTATCCGGGG
ATGAGGCTGTCGAATTACAGTACAAGCTGGAAATGTTTTTCCGTGCCGATATCGCTCTTTCGCCATTGCT
TGATGCCACTATTTCAGTTCCCGGATTTTGGTCGGCAGCGTCTCTTGCCTGTTTATTGAATACGTATCGT
GACGGTTATATCAGAGATAACCAGGACGATATCGATAAAGCCATTACCGCCCAAATCAATGCCTGGGCCT
TCAACAATCAATCCATCCTGAAAGAACGCGCGCGGCAGGCGATTGAGAACCCGCTTAAGCAGCCCGAACA
GGGCACACAGTATCAGGCCTGGGAAGACGACTGGATGATTGATGAGTGTTTATGCGCGATGTATGACGCA
TCATCCGAATCACCAGGAAAATAAAAATGATTAAATTCCGGCTTTATATTCCCCCTGTAATTCTCGGTTT
TGTTATCGTACCATTATTGGTATGGCCGACGGTTATTGCCTTAGCCGTACTTATATTCACGTTAACTTTT
CTGGCGGAAATAATATTCTCCTTTCCGCTCCTGGTTGTGCGTATTTCTCTTCAGGAATTACAACTTGAGT
TATTGGTTGAATATGCACTTTTTTTCAGTGTAATGTGTGGCATCGGTTGGCAATTCTCGCGCAGAACGCC
TCCTGAATTAAAAAACAGGTTACATTGCTGGCTGGTCTTTTCTCCGGTCTATTTTTGGTTAATTCTCTCG
AACTTCATTCTTTATATTTCTCCAGAGAAATCAGCGTTGCTGGAAAATATCCGAAATTTCTTTCTGACGT
TTGTCTGGCTTCCCCTGAATTTTTCCCCTTTTTGGCCGCAGCCGTGGACTGATTTTGTTGGCCCGATTAG
TGCACAGCTTGGTTTTGCGTTGGGATATTATTGTCAGTGGCGTAGCAAAAATAGAAGCCATAGGAAGAAG
TGGGGCGATTGGGTAACGTGCTTAAGTTTGGCGATTTTATCTCTGGGGCCGTTATTCAATTATTCACAAT
GAATAGTCTAAGGAATTCAAATAGCCCGGTTGCACTTCACAACCGGGCATCATCCTTACGACGCCTGCGA
CAACTTCTGCTGCGTATATTCCACCAGCCACTGACTCACACGAGATTGTTGTTCCGCATTCAGCCACATG
CCTTGTTTTGTGCGACGCCACAGGGCATCGTCGGCGCGGCGGACCCATTCGTGATCCACCAGATATTTCA
GCTCCGCTTCGTAGAACTCATGACCGAAATCTTCACCGAGGTCGCTTATCGCCCCTGCATTGCCGAGCAG
CAGTTCGCTGTTGCTGCCGTAAGTGCGCGCGTAGTGACGTGCCAGTGATTCGGTCAGGAATGGGTAACGG
CGGCGCAGGCGGGCGGCGTAATCGTCACGGTCGCCTTCAATGGCACCACCCGGCAGCACGCTCTCTTTCG
TCCACGCCGGACCAATGCCCTGATAATACGGCGTCAGTTTTTCCAGCGCGTGCTCCGCCAGTTTGCGGTA
GGTGGTCAGCTTACCGCCGAATACCGACAGCAGCGGGGCTTTGCCGTTTTCATCATGGATATCAAGGGTG
TAATCACGGGTAATGGCCTGCGGCGAGTCGGACTCATCATCACATAGCGGACGCACGCCGGAGTAGGTCC
AGACGATATCGTCCCGGTTTAACTGCTTTTTAAAGTGCGTGTTATACACTTTCAACAGGTAATTGATTTC
ACTCTCTTCAATCTTCACTGCTTTTGGATCGCCTTTGTATTCCACATCGGTGGTGCCGATGATGGAAAAC
TCGTCCATCCACGGGATCACGAAGACAATACGTTTATCTTCGTTTTGCAGAATGTAGGCTTGCTTCTGGG
TATGCACACGCGGCACCACAATATGGCTGCCTTTGATCAGGCGAATGCCATAAGGCGAAGGCAGATGCAT
CCCGTCGTCGAAAAATTGTTTCACCCACGGGCCGGTAGCATTAACCAGGCCGCGCGCCTGCCATGTATAT
TTTTTGCCGGTATCGATATCTTCCGCTTCCACAATCCACAGGCCGTTTTCGCGGCGAGCAGACGTGGCAC
GAGTACGAGTAAGCACTTCACCGCCTTTACGCACCACCATCTGGGCGTTGGCGAGTACCAGACGGGCGTC
GTCTACCCAACAGTCAGAATATTCGAATCCGCGCTTAATTTCCGGTTTTAACACTGAGTTTGCGCCAAAA
CGCAAACCGGTTGATCCCGGCAGGCTGGTGCGCTTACCCAGATGATCGTACATAAACAGACCAATGCGAA
TCATCCACGCCGGGCGTAGATGCGGACGATGCGGCAGGCGAAAACGCATCGGGAAGGCGATATGCGGGGC
CATTTTCAGTAGCACTTCACGTTCAGCCAGCGCCTCGCTGACCAGTCGGAATTCATAGTGCTCAAGGTAG
CGCAGGCCACCGTGAATGAGTTTTGAACTGGCGGAAGAGGTCGCGCAAGCGAGATCCTGCGCCTCCAGCA
TCAGCACGGATAAACCGCGTCCAGCGGCGTCTGCCGCGATACCAGCACCATTGATGCCGCCACCTATCAC
AATCAGATCTTTGGTTTCCATGCTGCCCTCATTCACTTTCGTTAAAGTTCATAAATGTTCGTTATCGAAC
ATATTAGCAAAGAATCGCGCTTTGGGTAACATTGAAAAAACATTTTAGAGTGATATGTATAACATTATGG
CGTTTATCTGCCGCTTCGACGTAAACTGTGCGGTAAATTTGCCCACTTGTTTGTAAAGAAAGAGAGACGC
ATGGATCAGTTCGAATGTATTAACGTTGCCGACGCGCACCAGAAGTTGCAGGAAAAAGAGGCGGTGCTGG
TCGATATTCGCGATCCACAGAGTTTCGCAATGGGGCATGCGGCGCAGGCTTTCCATTTAACTAACGACAC
ACTGGGCGCGTTTATGCGTGATAACGACTTCGATACGCCAGTCATGGTGATGTGTTACCACGGTAATAGC
AGCAAAGGCGCGGCGCAGTATCTGCTGCAACAGGGCTACGATGTGGTCTACAGCATTGATGGCGGCTTTG
AAGCCTGGCAGCGCCAGTTTCCCGCAGAGGTGGCGTACGGCGCGTAACGCTTTATACTGTCCCCTTTTGT
GTGGAATAAGCGACAGCAACGATGTTGATGATTACCTCTTTTGCTAACCCCCGAGTGGCGCAGGCGTTTG
TTGATTACATGGCGACGCAGGGTGTTATCCTCACGATTCAACAACATAACCAAAGCGATGTCTGGCTGGC
GGATGAGTCCCAGGCCGAGCGCGTGCGGGCGGAGCTGGCGCGTTTTCTCGAAAACCCGGCAGATCCGCGT
TATCTGGCGGCCAGCTGGCAGGCGGGCCATACCGGCAGTGGCCTGCATTATCGCCGTTATCCTTTCTTTG
CCGCCTTGCGTGAACGCGCAGGTCCGGTAACCTGGGTGATGATGATCGCCTGCGTGGTGGTGTTTATCGC
CATGCAAATTCTCGGCGATCAAGAAGTGATGTTATGGCTGGCCTGGCCATTCGATCCGACGCTGAAATTT
GAGTTCTGGCGTTACTTCACCCACGCGTTAATGCACTTCTCGCTGATGCATATCCTCTTTAACCTGCTCT
GGTGGTGGTATCTCGGCGGTGCGGTGGAAAAACGCCTCGGTAGCGGTAAGCTAATTGTCATTACGCTTAT
CAGCGCCCTGTTAAGCGGCTATGTGCAGCAAAAATTCAGCGGGCCGTGGTTTGGCGGGCTTTCTGGCGTG
GTGTATGCGCTGATGGGCTACGTCTGGCTACGTGGCGAACGCGATCCGCAAAGTGGCATTTACCTGCAAC
GTGGGTTAATTATCTTTGCGCTGATCTGGATTGTCGCCGGATGGTTTGATTTGTTTGGGATGTCAATGGC
GAACGGAGCACACATCGCCGGGTTAGCCGTGGGTTTAGCGATGGCTTTTGTTGATTCGCTCAATGCGCGA
AAACGAAAATAATTCCAGGGATTTAGAAATGAAACAAACACAACGTCACAACGGTATTATCGAACTGGTT
AAACAGCAGGGTTATGTCAGTACCGAGGAGCTGGTGGAGCACTTCTCCGTCAGCCCGCAGACTATTCGCC
GCGACCTCAACGAACTGGCAGAGCAAAACCTGATCCTGCGCCATCATGGCGGTGCGGCGCTGCCTTCCAG
TTCGGTTAACACGCCGTGGCACGATCGCAAGGCCACCCAGACCGAAGAAAAAGAGCGCATCGCCCGCAAA
GTGGCGGAGCAAATTCCCAATGGCTCGACGCTGTTTATCGATATCGGCACCACGCCGGAAGCGGTGGCGC
ACGCGCTGCTTAATCACAGCAATTTACGCATTGTGACCAACAATCTCAACGTCGCTAACACGCTGATGGT
AAAAGAGGATTTCCGTATCATTCTTGCCGGTGGTGAATTGCGTAGCCGTGATGGCGGGATCATTGGCGAA
GCAACGCTCGATTTTATCTCCCAGTTCCGCCTCGATTTCGGCATTCTGGGGATAAGCGGCATCGATAGCG
ACGGCTCGTTGCTGGAGTTCGATTACCACGAAGTTCGCACCAAACGCGCCATCATTGAGAACTCGCGCCA
CGTTATGCTGGTTGTCGACCACTCAAAATTTGGCCGTAACGCAATGGTCAATATGGGTAGCATCAGCATG
GTCGATGCTGTCTACACCGACACGATGCCGCCTGCGAGCGTGATGCAGGTGCTGAAGGACCATCATATTC
AACTGGAGCTGTGCTGATCCTGCATTGCTTCCCATGTCAGACCAAAACGCGCCAGGTATTTGCGTAGCCG
ATCCGCGTCATTGACGCTGGCTTTACCCTGGCGCGAAACATCAAAAAGCTGTCGTCCGGCAGCAGAAAGC
GACTTTGCCTGACGACAAACGGCAATAACGTTTTCCAGTTGCATACGGTCGAAGAGGTCGATGTTTTCTG
CCTCTGTACCCAGCAACGCCGTAAGCGCGGAGGGGCGACTCTCCTGCCAGTTATAGCGCAGACGGTTGAT
CTCATCTTCCACCGTATCCAGTGTGATGCGTCCGCTAGTGGCAAAGGTGGCCATCCGCGTGACGCTGGCA
GAAAGTTCGCGAAAGTTGCCGCGCCATGTTGCCTGGGGAGAGGTCGCAAAGGCCAGCCAGGCACGCCGCG
CTTCGGTGTTAAAACGCACACTGTCGCCAGTGAGTGAGGCGTGGCGCTCCACTTCATAATCCAGGTTCGG
TTCAATATCTTCCTGGCGCTGGTGTAATCCTGGCAGGGTGAAGGTCCAGAGATTGATCCGCGCGTACAGA
TCTTCGCGGAATTTGCCTTCGGCAACCAGCTGACGCAAATCGCGCACCGTTCCGGCGATCAGCTGAAAGT
CGCTACTCACCTGGCGATCGCTGCCAAACGGATAAAAGGTTTTCTCTTCAATGGCTTTCAGCAGCATTGC
CTGTTCGTCTGCGCCCAGTTCGCCAATCTCATCAAGAAATAACATCCCGCCGTTGGCGCTGCGTAATAAT
CCTTCCCGCGACTCCCGCGCCCCGGTAAACGCGCCTTTCACATGACCAAACAGCGCTGACATGGCGGTAT
CGCCGCGCAGAGTGGCACAGTTCACCTCCACAAACGCGCCGCTAAACTGATGCCGCGCCTGTTTTAACTC
GAAGATGCGTCGTGCCAGAAACGACTTTCCCGCACCGGTTGGGCCGTTGAGCAGGATCGGTGCGCGGGAT
TTGATCGCCACTTTTTCGATCTGCTCAATCATGCGGTTGAAGTGGGCGTTACGCGTGGCAATGCCGGACT
TAAGAAAATCGAGCGTTTGCTGGCGTTCCTCGGCAAAGCGGCTGGCGATGGCGTTATAACGGCTTAAATC
GAGATCGATAATCGTCACTTCACCTGCACCGCGCGGCTGTTCTTTTTTACGCGGTGGCGAAGATTGTATT
AACCTGGCGGGCAGGTAACGTGCTTCCGCCAGCAGAAACCAGCAAATCTGCGCGACGTGGGTACCGGTGG
TGATGTGAATTAAATAGTCTTCTTTTTCTGGCTGAAACGCGTAACCACGGGCGAAATCATGCAGGCAGGC
GTAAACCTCCTCGAAATCCCATGGGTTATGCAGTTCAATCTCAACGCCCACCACTTTTGTTTCTGGCGAA
ACATTGGCGATATCGCGTTTAAGCGTTTCAAACAGCGAGCGTGAGCGGGCGTCGTGCAACAATTCCAGTC
GATTGATGACTAACGATTCTTGCTGGCATAGACAGAGTGACGGACGCCATTTCGACCATCGCTGACTGCC
GCGCCCGGCATAATCCAGTACGGTGCCGACAAAGCCAAAAGCCACTGTTTTACGCATCTTAGATATCCTT
ATAAAAGACGATATTTCATTATCGGAAAATTGGCTTTGTGGGAAATCTCCGTTTACGGACGTAAAGATTT
TATCTATTTAAAAACAATGAATTAAAAAATTAATCTACTCATTTAATTTTCTGGCACGACGGTTGCAATT
ATCTGGACAGCAAACAACGAAAAGAGAAAAATAAAATGAATTACGAATTACTGACCACTGAAAATGTCCC
GGTAAAAATGTGGACCAAAGGCGTACCGGTAGAAGACGATGCGCGTCAGCAACTGATAAATACGGCGAAG
ATGCCGTTTATTTTCAAACATATTGCGGTAATGCCTGATGTACATCTGGGTAAAGGTTCCACCATTGGTA
GCGTGATCCCAACCAAAGGAGCGATTATTCCGGCGGCGGTGGGGGTAGATATCGGTTGTGGAATGAACGC
GCTGCGTACCGCGTTAACGGCGGCTGACCTGCCTGAAAACCTGGCGGAGCTGCGTCAGGCGATTGAAGCT
GCCGTGCCGCATGGGCGTACCACAGGCCGTTGTAAACGTGATAAAGGCGCATGGGAAAAACCGCCTGTTA
ACGTCGATGCGAAATGGGCTGAGCTTGAAGCCGGTTATCAGTGGTTAACGCAAAAATATCCGCGTTTCCT
TAATACCAATAACTATAAACACCTGGGAACGCTGGGAACGGGTAACCACTTTATTGAAATTTGCCTTGAT
GAGTCGGATCAGGTGTGGATTATGCTGCACTCCGGTTCACGCGGAATTGGTAATGCCATCGGGACTTACT
TTATCGATCTGGCGCAAAAAGAGATGCAGGAAACACTTGAAACGTTGCCATCGCGTGACCTGGCGTACTT
TATGGAAGGTACGGAATATTTTGACGATTACCTGAAAGCGGTGGCCTGGGCGCAGCTTTTTGCCAGCCTT
AACCGCGATGCGATGATGGAAAACGTGGTAACGGCGTTGCAGAGCGTTACGCAGAAAACGGTAAGACAGC
CACAAACGCTGGCGATGGAAGAGATCAACTGTCACCACAACTATGTGCAAAAAGAACAGCACTTTAGCGA
AGAGATCTATGTGACGCGTAAAGGCGCGGTGTCTGCGCGTGCTGGTCAATATGGAATTATTCCCGGTTCG
ATGGGGGCGAAAAGCTTTATTGTCCGTGGGCTGGGAAATGAAGAGTCGTTCTGTTCGTGCAGCCACGGTG
CCGGGCGGGTAATGAGCCGTACTAAAGCGAAAAAACTGTTCAGCGTGGAAGATCAAATTCGTGCCACCGC
GCATGTGGAATGCCGTAAAGATGCCGAAGTGATCGACGAAATCCCGATGGCGTATAAAGATATTGATGCG
GTGATGGCGGCACAAAGCGATCTGGTGGAAGTTATCTATACCCTGCGTCAGGTGGTGTGCGTAAAAGGAT
AAATGATGAAAAGGATGATTGCGCTGGATGGCGCACAGGGCGAAGGCGGCGGGCAGATCCTGCGCTCGGC
GCTGAGCCTGTCGATGATAACTGGCCAGCCATTTACCATCACTGGCATTCGTGCCGGGCGGGCGAAACCG
GGGCTGTTGCGCCAGCATCTGACCGCGGTTAAGGCGGCGACGGAAATTTGCCGAGCAACGGTGGAAGGCG
CGGAGCTGGGGTCGCAGCGTCTGGTCTTCCGGCCCGGTACCGTGCGTGGCGGCGATTACCGCTTTGCTAT
CGGTAGTGCCGGAAGCAGCACGCTGGTGCTGCAAACGGTGCTACCCGCGCTGTGGTTTGCTGACGGGCCT
TCGCGTGTTGAAGTGAGCGGCGGCACCGATAACCCGTCGGCACCGCCTGCGGATTTTATCCGCCGGGTGC
TGGAGCCGCTGCTGGCGAAAATGGGCATTCATCAGCAAACCACATTATTACGCCACGGTTTTTATCCTGC
CGGAGGCGGGGTGGTGGCGACGGAAGTCTCGCCCGTGGCATCGTTTAACACTTTGCAACTTGGCGAGCGC
GGGAACATTGTGCAGATGCGTGGAGAGGTGCTGTTAGCTGGCGTGCCGAGGCATGTCGCTGAGCGTGAAA
TCGCTACGCTGGTGGGTAGTTTTTCCCTGCATGAGCAGAATATTCATAACCTGCCGCGTGACCAGGGATC
GGGTAATACCGTCTCGCTTGAAGTCGAAAGTGAAAATATCACCGAACGCTTTTTTATCGTCGGTGAAAAG
CGCGTCAGCGCCGAGGTGGTCGCCGCGCAGTTGGTGAAAGAGGTGAAACGCTACCTGGCAAGCCCGGCGG
CGGTGGGGGAATATCTCGCCGACCAGCTGGTACTGCCGATGGCGCTGGCGGGCGCGGGAGAATTTACGGT
CGCCCATCCTTCATGCCATCTGCTGACCAATATCGCCGTGGTGGAACGTTTCTTGTCGGTGCGGTTTAGT
CTGGTGGAGGCGGATGGCGTAACGCGGGTGAGCATTGAATGATATAAAGATGTAAGCCGGATCCAATGCA
TTATCCGGCTAAACTCACACCCCATATCCCATCATCTTCAGCAGTTTCTGCGCGTGTTGTACCGCGGCCT
GACGGTGGGCGACGCCGAGTTTTTGGTACAGATTGCGGATATGCGTTTTGATGGTGGTTGCCGCCACTTC
CAGCTCGCCTGCAATTTGCTCATTGCTGTAACCGGAGTAAATCAGCCCCAGGACCTGCCATTCACGTTGG
GTCAACGGGCTGGTGCGGATCAGTTCTGGCACTTCCGGATGATTTAGCAGACGTTCAACGAAATTCTCAT
CGAAATGGGCGAATTTATGCCGATGATGTTGATTGATTTCTCGCAGAATACGCTGTGCGCGATGCTGTTC
CAGTTCCGGCAGCGTATTGAGTTGAATCAGCTGGCGCAGTTGTTGCGCCATCGCTTCGCCTTCGATGACA
AAATGACTGATAAATCCGGTGCGATTCGCCAGTTTTAATGCGTCCAGCAACACACGCTGGGCGTCACTTT
TACGTCCGGCCTGCCAGTACAGTTGATTAAGCAGCAACAGGTTACGGTTGAGATCGCTCATCAACCGCAG
ACTGCGGGCGTTTTCATTGAGTTCTTCGAGAACAATTTCTGCCGGTTCAAACTCGCCCAGCAAGATTTGT
GCACGGGCAATGTTGCGCCATTGACCTTGCAGGAAGTGGTTGTTCGCAAACTCCGGTTTGGCCGTATGAC
GCAACCAGTTGGCAGCGGCGGCTTTATCGCCGGTCATTTGCCAGTAAATCACCCGGACTTTGTTGGCGTT
AGAGATCCAGTCGCTGTGATATTTGCCATTCCCCAGCAGGTTTTCCAGACGGTTAAGCTGGCTACGGGCG
TTATCTAAATCACCACGGGCCAGCGAGCATTGAATCAACATTGCCAGGCACTGAAGCTGTTGCTGAGGCT
GATAAGACGACAAGACTTCAATCCCGCTACGCGCCGACGCTTCGGCTTCATCCAGCCGTGCCCAGGCCCA
TAACAGCTGTGCACGAATGCGCACCAGAAACTCATGCATTGGCAGCTGTTCCAGATGCTGCTCGTTGATC
AGCTGGAACGCTTTTTCCTGCGTTTCCCACGCGGTTTGCAGGAATCCCTGAGCAAACAGAATTTCACTTT
GCTGGATTAAACTCCATAAGGCGTAGTGCCAGACATCGTGCTGGCGCGCCATCTGTTCGGTTTGCTGCAT
TAGCGCCAGTGAGCGGGTCAATTCGCCTTTGCAGTGCAACACTTCACCCAGCACCGAGGTTGCCACAATG
CGGCTATAGAACCAGCCCGGCGGCAGCTCTTCCAGTGCCAGTTTTGCCAGCCGTTCCGCTTCATCCGGAT
TACCATCGTTAATCGCCACCTGGGCGCGCAGAGCGTTAAATTCTGCGTGCATGGTGCCTTCTCTGATGTC
CTTGATTTCATGTTCAGCGCGGGCCAGCAGGGTGTTAACTTCGCCGTAGCGATGCTGGCTTTGCATCAGC
CACGCCTGCAATAACACCAACTGCGGATTTTCCAGCAAACTGTCCCACGGCAGGGCCTTAAGCGACTCTT
CCAGCAGTGACAGTTCGCTATGGTTGAACAAACTCCAGGCGTGATTAAGCAGAATATCGCGCAGCATCAG
CGCATCGCCTGCCGCCAGCGCATGATGAATCGCTTCGCTGGGAAATCCCTGGGCCATCCAGCTTTCTGCG
GCGGCACGGTGGATTTCCGGCAGCTCCGCCGCCAGTTCCCACTGGCAGCGCTGGCGCAGGAAGTTACCAA
ACAGTGGGTGATAGCAAAACCACTCGCCGGTATCATCCATCCGCTGTAAAAACAGCCCCTGACGCTCAAT
CTCTTCGAGGCGCATTTGCCCGTTTTCTTCGCCGGTCACACGGTTGATGAGTGCATCGTTCATTGAGCGC
AAAATGGCGCTTTTCAACAGAAAATGGCGCGTTGCGAGATCGACGTTATCCAAAACCTCATCGACCAGAT
AATCCGAAAGATGGCTGGCATTGATTCCCGCCAGGCGGCGTGCCGACTTATGGGCTGAGTGGGTATTCTG
CCGGGCGGAGAGGGCGATTAGCTGCAGTGCCGTCGCCCAACCGGAAACGTCATCACAAATCCGACTGCTT
TCTGCGGCTTCAATCGGCGATGACAGACGGCAATCAAAAAACTGCTTCGCTTCCTGATGGGTAAATGCCA
GTTGCTGACTGCCAATTTCCAGCAGTTGGTCACGAACACGCAGATTGGCAATGCCCAGTTGCGGAAGGTT
GCGTGACAACACCACCAGGGTGAGATTTTCTGGTTGATGGCGAATAAAGAAGCGCATTGACTCGTGGATC
ACTGGATTAGTGATCAGATGATAGTCATCGATGACCAGATAAAGTGGGCTATGCCATTCCGCCAGCTCAA
TGAAAAGCTGGGCGAAGAGTGACGTCAGGCTGGCATATTGCCGTTTTTGCGCCATTGTCTCACATATCGC
GCAGTGACCGTTGGTTGCCTGTTGCATGGCGGCAATGAGATAGCTGGCGAAACGCTCTTGCTGGTTATCA
CCTTCATCCAGCGAGTACCAGCCGATATCGTTTTTGCCTGCCGCCCACTGGGAAATGAGCGTGGTCTTTC
CGTAGCCCGCAGGACTTGTGATCAGCGCCAGCCGGAAGTTGTTCGCGCCGGAAAGTTTAGCCAGCAGGCG
CTCACGAACCACGGTATGGTCGAGTCGAACCGGACGACTTAATTTTGACGGAATCAGCATAGTTAATCAC
TTCACTGTGGAAAATGAGGAAATATTATTTTTTTGCGCTTCGTAATTAATGGTTATAAGGTCGGCCAGAA
ACCTTTCTAATGCAAGCGATGACGTTTTTTTATGTGTCTGAATTTGCACTGTGTCACAATTCCAAATGTT
TATTAACAACTCACCTAAAACGACGCTGATCCAGCGTGAATACTGGGTTGTACGGTATTTTCCTTATGTT
CATCAGTTTCATTTAAGCAAGGGTTTCTTCTTCATTTCTGATGAAAGTGCCATCTAAAAAGATGATCTTA
ATAAATCTATTAAGAATGAGATGGAGCACACTTGATATTTTACTTATGAAACTGTTTCACCCCTTTACTT
AATTTATAGAGTTACCTTCCGCTTTTTGAAAATACGCAACGGCCATTTTTTGCACTTAGATACAGATTTT
CTGCGCTGTATAGCATTGATTTGCTGCTAATCCTGTGGTTTGCACTAGCTTTAAGTGGTCGAGATCACAT
TTCCTTGCTCATCCCCGCAACTCCTCCCTGCCTAATCCCCCGCAGGATGAGGAAGGTCAACATCGAGCCT
GGCAAACTAGCGATAACGTTGTGTTGAAAATCTAAGAAAAGTGGAACTCCTATGTCACAACCTATTTTTA
ACGATAAGCAATTTCAGGAAGCGCTTTCACGTCAGTGGCAGCGTTATGGCTTAAATTCTGCGGCTGAAAT
GACTCCTCGCCAGTGGTGGCTGGCAGTGAGTGAAGCACTGGCCGAAATGCTGCGTGCTCAGCCATTCGCC
AAACCGGTGGCGAATCAGCGACATGTTAACTACATCTCAATGGAGTTTTTGATTGGTCGTCTGACGGGCA
ACAACCTGTTGAATCTCGGCTGGTATCAGGATGTACAGGATTCGTTGAAGGCTTATGACATCAATCTGAC
TGACCTGCTGGAAGAAGAGATCGACCCGGCGCTGGGTAACGGTGGTCTGGGCCGTCTGGCAGCGTGCTTC
CTCGATTCAATGGCAACTGTTGGTCAGTCTGCGACGGGTTACGGTCTGAACTATCAATATGGTTTGTTCC
GCCAGTCTTTTGTGGATGGCAAACAGGTTGAAGCGCCGGATGACTGGCATCGCAGTAACTACCCGTGGTT
CCGCCACAACGAAGCACTGGATGTGCAGGTAGGGATTGGCGGTAAAGTGACGAAAGACGGACGCTGGGAG
CCGGAGTTTACCATTACCGGTCAAGCGTGGGATCTCCCCGTTGTCGGCTATCGTAATGGCGTGGCGCAGC
CGCTGCGTCTGTGGCAGGCGACGCATGCGCATCCGTTTGATCTGACTAAATTTAACGATGGTGATTTCCT
GCGTGCCGAACAGCAGGGCATCAACGCGGAAAAACTGACCAAAGTTCTCTATCCAAACGACAACCATACT
GCCGGTAAAAAGCTGCGCCTGATGCAGCAATACTTCCAGTGTGCCTGCTCGGTAGCGGATATTTTGCGTC
GCCATCATCTGGCGGGGCGTAAACTGCACGAACTGGCGGATTATGAAGTTATTCAGCTGAACGATACCCA
CCCAACTATCGCGATTCCAGAACTGCTGCGCGTGCTGATCGATGAGCACCAGATGAGCTGGGATGACGCC
TGGGCCATCACCAGTAAAACTTTTGCTTACACCAACCATACCCTGATGCCAGAAGCGCTGGAACGCTGGG
ATGTGAAACTGGTGAAAGGCTTACTGCCGCGCCACATGCAGATTATTAACGAAATTAATACACGCTTTAA
AACGCTGGTGGAAAAAACCTGGCCGGGCGATGAAAAAGTGTGGGCCAAACTGGCGGTGGTACACGACAAA
CAAGTGCATATGGCGAACCTGTGTGTGGTTGGCGGTTTCGCGGTAAACGGTGTTGCGGCGCTACACTCGG
ATCTGGTAGTGAAAGATCTGTTCCCGGAATATCACCAGCTATGGCCGAACAAATTCCATAACGTCACCAA
CGGTATTACCCCACGTCGCTGGATCAAACAGTGCAACCCGGCACTGGCGGCTCTGTTGGATAAATCACTG
AAAAAAGAGTGGGCTAACGATCTCGATCAACTGATCAATCTGGAAAAATTCGCTGATGATGCGAAATTCC
GTCAGCAATATCGCGAGATCAAGCAGGCGAATAAAGTCCGTCTGGCAGAGTTTGTGAAAGTTCGTACCGG
TATTGAGATCAATCCACAGGCGATTTTCGATATTCAGATCAAACGTCTGCATGAGTACAAACGCCAGCAC
CTGAATCTGCTGCATATTCTGGCGTTGTACAAAGAAATTCGTGAAAACCCGCAGGCTGATCGCGTACCGC
GCGTCTTCCTCTTTGGCGCGAAAGCGGCACCGGGCTACTACCTGGCGAAAAACATTATCTTTGCGATCAA
CAAAGTGGCTGACGTGATCAACAACGATCCGCAGGTTGGCGACAAATTGAAGGTGGTGTTCCTGCCGGAT
TATTGCGTTTCGGCGGCGGAAAAACTGATCCCGGCGGCGGATATCTCCGAACAAATTTCGACGGCAGGTA
AAGAAGCTTCCGGTACCGGCAATATGAAACTGGCGCTCAGTGGTGCGCTTACTGTCGGTACGCTGGATGG
TGCGAACGTTGAAATCGCCGAGAAAGTTGGTGAAGAAAATATCTTTATTTTTGGTCATACCGTGGAACAA
GTGAAGGCAATTCTGGCCAAAGGCTACGACCCGGTGAAATGGCGGAAGAAAGATAAGGTGCTGGACGCAG
TATTGAAAGAGCTGGAAAGCGGCAAATACAGCGACGGCGATAAGCATGCCTTCGACCAGATGCTGCACAG
TATCGGCAAACAGGGCGGCGATCCGTATCTGGTGATGGCGGATTTCGCAGCCTATGTAGAGGCACAAAAG
CAGGTGGATGTGCTGTACCGCGACCAGGAGGCCTGGACTCGCGCGGCGATCCTCAATACCGCCCGCTGCG
GTATGTTTAGCTCGGATCGCTCTATTCGCGATTATCAGGCTCGTATCTGGCAGGCAAAACGCTAAGGAAG
CTCGATGGAAAGCAAACGTCTGGATAATGCCGCGCTGGCGGCGGGGATTAGCCCCAATTACATCAATGCC
CACGGTAAACCGCAGTCGATTAGCGCCGAAACCAAACGGCGTTTGCTTGACGCGATGCATCAACGTACCG
CCACGAAAGTGGCGGTAACACCAGTCCCGAATGTCATGGTTTATACCAGCGGCAAAAAAATGCCGATGGT
GGTGGAGGGCAGCGGCGAATATAGCTGGCTGCTGACCACCGAAGAAGGAACGCAGTACAAAGGCCATGTA
ACGGGGGGCAAAGCGTTCAATCTACCGACGAAGCTGCCGGAAGGTTATCACACGCTGATACTCACCCAGG
ACGACCAGCGCGCGCATTGCCGGGTGATTGTCGCCCCGAAACGCTGTTACGAACCGCAGGCGTTGCTGAA
CAAACAAAAGCTGTGGGGTGCCTGCGTTCAGCTTTATACGCTGCGATCGGAAAAAAACTGGGGTATTGGG
GATTTTGGCGATCTCAAAGCGATGCTGGTGGATGTGGCAAAACGTGGCGGGTCGTTCATCGGTCTGAACC
CGATTCATGCGCTCTATCCGGCAAATCCGGAAAGTGCCAGCCCGTATAGCCCGTCTTCTCGCCGTTGGCT
GAATGTGATTTATATCGACGTTAACGCCGTTGAAGATTTCCATCTTAGCGAAGAGGCTCTGGCCTGGTGG
AAGTTGCCGACCACGCAACAGACGCTGCAACAGGCGCGGGATGCCGACTGGGTTGATTACTCCACGGTTA
CCACCCTAAAAATGACAGCATTACGAATGGCGTGGAAAGGTTTCGCGCAACGTGATGATGAGCAGATGAC
CGCGTTTCGCCAGTTTGTTGCAGAGCAGGGCGACAGCCTGTTCTGGCAGGCAGCCTTTGATGCGCTACAT
GCCCAGCAAGTGAAAGAGGACGAAATGCGCTGGGGCTGGCCAGCATGGCCAGAGATGTATCAGAACGTGG
ATTCACCAGAAGTGCGCCAGTTCTGCGAAGAACATCGTGATGACGTCGATTTTTATCTCTGGTTGCAGTG
GCTGGCTTACAGCCAGTTTGCCGCCTGCTGGGAGATAAGCCAGGGCTATGAAATGCCGATTGGCTTGTAT
CGTGATCTGGCCGTTGGTGTAGCAGAAGGTGGGGCAGAAACCTGGTGCGACCGTGAACTGTATTGCCTGA
AAGCGTCGGTTGGCGCGCCGCCGGATATCCTCGGCCCGTTGGGGCAGAACTGGGGATTGCCGCCAATGGA
CCCGCATATCATCACCGCGCGTGCCTATGAACCGTTTATCGAGCTGTTGCGTGCCAATATGCAAAACTGC
GGCGCATTACGAATTGATCACGTGATGTCGATGCTGCGTTTGTGGTGGATACCGTATGGCGAGACGGCAG
ATCAGGGCGCGTATGTTCACTATCCGGTAGATGATCTGCTCTCGATTCTGGCACTCGAAAGTAAGCGCCA
TCGCTGCATGGTGATTGGTGAAGACCTCGGCACTGTACCGGTAGAGATTGTCGGTAAACTGCGCAGCAGC
GGTGTGTACTCCTACAAAGTGCTCTATTTCGAAAGCGACCACGAGAAGACATTCCGCGCGCCGAAAGCGT
ATCCGGAGCAGTCGATGGCGGTTGCGGCGACACACGACCTGCCTACACTGCGTGGCTACTGGGAGAGCGG
GGATTTAACACTGGGTAAAACGCTGGGGCTGTACCCGGATGAAGTGGTATTGCGCGGTCTGTATCAGGAT
CGCGAACTGGCGAAGCAAGGGTTGCTGGATGCACTGCATAAACATGGTTGCCTGCCAAAACGTGCGGGGC
ATAAGGCATCGTTAATGTCGATGACGCCGATGCTTAATCGTGGTTTGCAACGTTATATCGCTGATAGTAA
CAGTGCTCTGTTAGGGCTTCAGCCAGAAGACTGGCTGGATATGGCCGAACCGGTAAATATTCCTGGCACC
AGCTACCAGTACAAAAACTGGCGACGCAAGCTTTCCGCAACGCTTGAGACGATGTTTGCCGATGATGGCG
TGAACAAGTTGCTGAAGGATTTGGACAGACGGCGCAGAGCGGCAGCGAAGAAGAAGTAGAGTGCGGTTGA
TGCCGGATGCGACGCTTGACGCGTCTTATCCGGCCTACTAATTAATGCCGAATCGTAGGCCGGATAAGGC
GTTCACGCCGCATCCGGCTATCAGTATTATCAAATCACCATATTCAGCAGCAGACAGCCTACCAGACCGC
ACACCGAGATAATGGTTTCCAGCATCGACCAGGACTTGATGGTCTCGCCGATAGTCAGGTTAAAGTACTC
TTTGAACAGCCAGAAGCCCGGATCGTTCACGTGAGAGAAAATCACACTACCGGAACCAACCGCAATAACC
ATCAGTTCCGGGCTAACACCCGTCGTTGCAATTAGTGGTGCCGCGATACCCCCCGCAGTGATTGCCGCAA
CGGTTGCGGAACCCAGCGCGATACGCAGTACGGCGGCAATCGACCAGGCCATCAGCAGCGGAGAAATGTT
GGTTTCGTGCATCATGGAAGCAATGTATTTGTCCACGCCGCTGTCTACCAGCACCTGCTTGAACGCACCG
CCACCACCGATGATCAACAGCATCATCGCGATGATTTTGATGGAAGAAACCAGCGTGTCGTTAATCTGAT
CCATTGAACGACCACGGTTCAGACCAAAGGTGAACATAGCAATCAGCACGGCAATCAGCGTTGCCATTAC
CGGGTCACCGAGGAACTCCGCCACCGGCAGGAAAGCGTGACCTTTCGGCAGGATCATTTCGGCAATTGCA
CGCATCGCCATCAGCACAACCGGCACCAGAGAAGTCCAGACGCTGACGCCAAAGCTTGGCATCTCTTCTT
CGCTGAAGGTTTTCGCGCTGTACAGACCTTCCGGGATTGGCTTATCGATACCTTTCAGCACGCGAGCGTA
AACCGGACCGGCGAGAATAACGGTCGGGATTGCCAGAATAGTACCGTACAGCAGGGTTTTACCCATATCG
GCATTGAAAATGGTGGCAATCGCAGTCGGACCCGGATGCGGTGGCAGGAAGCCGTGGGTCACAGACAGTG
CAGCCGCCATTGGTACACCAACATACAGCAGTGGAATATTCGCGGAAGCCGCGATGGTAAACACCAGCGG
CAGCATCAGCACGAAACCCACTTCATAGAACAGGGCAAAACCAACGGTAAAACCGGTCAGTACCACCGCC
CACTGGATGTGTTTTTTACCAAATTTAGCAATCAGCGTGGTGGCGATACGTTGTGCGCCACCGCAGTCTG
CCAGCATTTTGCCCAGCATTGCGCCAAAACCCATGATCAGGGCAAGGCTACCGAGCGTTCCGCCGACACC
GGCTTTGATGGAGCCAATAACTTTATCCAGCGGCATTCCTTGCATTAATCCAACAGCAAGCGCCACGAGG
ACGAGAGCGATGAAACCGTTCATTTTGAAGCGGATCATCAGGAGTAATAACAAGATTACACCGATAGCAA
CAATGACTAATGGCATGATTTACCTGGCCTTTAATTTGTTATGGGTAACGTCAGGTTTCTGACGGAAAAT
CCTGGTTGTCCCAACTGGGAACAGAGATGTTACGGCACCACGGCTGATGACCCCTAAAACGAGTTAGTGT
AGTCAGATGTTATGAGTGTGTTTGGTGCCCATGGGAATGATACGGGTAACATTACGTGCTTGAGAATCAC
CAGAGCGGGGTAAATTTAAATTATGAGAGGTTGGTCATATTATCGTGGGGAAACGAAGAGATTGGATTTG
CTGAGGTAATTCTGCGCTAATGTCAGACTCTCGTGCAACGTACAGGCCCGATAAGACGCTTTAGCGTCAC
ATCGGGCAATCGACAAAAGAGGAGAGAACTTAGTAGTAAGAGTGCTCGCCGCGTTGGTGTTCGGTGAGAT
CGCGTACACCTTTCAGCTCCGGGAATTCGTTCAGCAACTGCTTCTCGATCCCCTCTTTCAGCGTTACATC
GACCATGGAACAACCGTTACAGCCGCCGCCAAATTGCAAAATGGCGTAACCGTCTTCGGTGATTTCCATC
AGCGAAACGCGACCACCGTGACCAGCAAGCTGTGGGTTGATCTGTGATTGCAGCATATACTCCACGCGCT
CCATCAGCGGCGCATCGTCAGCCACTTTACGCATTTTGGCGTTAGGCGCTTTCAGCGTCAGCTGCGAACC
CAACTGGTCGGTAACAAAATCGATCTCTGCATCTTCCAGGTAAGGAGCGCTTAACTCATCAACATACGCG
GTCAGCAGGTCAAATTTCAGGGCGGTGTCGGTGGCTTCCACAGCGTCCGGCGGGCAATAAGAAACACCAC
ATTCAGCGTTAGGCGTGCCAGGGTTAATCACAAATACGCGGATTTGTGTCCCTTCTTCCTGATTTGCCAG
CAGTTTGGCAAAGTGCGCTTGTGCAGCATCGGAAATACGGATCATAGTAATGGCCTAATAGTTGACTATT
TTAGTTGGTTATAATACGCCCATCATCGAGGCTCTACAAGGTTCGACAAAGGCACCAGACCTGGACAGTC
GCCGCACCATTGCGTAAAAGCAACTGCGCAATCTCTGCGACGGTACTTCCGGTGGTAACGACATCATCCA
CAATCACCATATGGCGACCTTGCACAGGCAATTCAAGGCGAAAGGCATTTTTCAGGTTGTGTTTGCGTAG
CCGGGCGTTAAGAAAATGCTGGGTCGCGGTGGCCCGTGTTCGTGTGACGGCTTCGCTATCCCATTGGCAG
TGTAGCCAGCGTGATAACGGCTGACACAGCAAATCGCTCTGATTAAATCCCCGACGCCAGTGACGCCGCT
GCCATAACGGAACGCTGATGATGCGATCAGGCAGTTGCAAGCCGGTGGTGCGACGAGCGTGTAAGACTTC
CAATAGTAACAGACGTGACAGGGCTCTGGCGATTTCACTGCGCCGGGAAAACTTAAGCTGGTGAATGAGC
GGACTTAATGGCGGCGCATAATCGGCGACCGTGACCAGTCTTTGCCAGGGCGGCGGTTTTTGCAGGCAGC
GACCGCAGGGAAGATGAGAGTGTGTGGCGGGTAATCCACATTGTGGGCATAACGTTTTATCTGTACGGGC
GGCGCGAGAGCAGACCGAACAAATCCCCCAATGACCTAACGCCAGCGGCATTCGGCATAGCCAGCATAAT
CCCGGTACTGTTAGCATATGTTCATCCTTGTAAGTAAAAAGAGAACAATAGCGGATGAATAACATCTGGT
GGCAGAGCAAAGGTCAGGGGAATGTTCATCTTGTGCTGCTGCACGGATGGGGACTGAATGCCGAAGTGTG
GCGTTGCATTGACGAGGAACTTAGCTCGCATTTTACGCTGCACCTTGTTGACCTGCCCGGCTTCGGGCGT
AGCCGGGGATTTGGTGCACTATCACTTGCTGATATGGCCGAAGTCGTGCTGCGACAGGCGCCAGATAAAG
CCATTTGGTTAGGCTGGAGTCTGGGCGGGCTGGTGGCAAGCCAGATTGCGTTAACCCATCCCGAGCGTGT
TCAGGCGCTGGTCACCGTGGCGTCGTCACCTTGTTTTAGTGCTCGCGACGAGTGGCCGGGGATAAAACCG
GACGTGCTGGCGGGATTTCAGCAGCAGCTGAGTGATGATTTTCAGCGTACAGTGGAGCGGTTCCTGGCGT
TACAAACCATGGGTACTGAAACGGCGCGCCAGGATGCGCGGGCGTTGAAGAAAACCGTTCTGGCGTTACC
GATGCCGGAGGTTGACGTGCTTAATGGCGGGCTGGAAATCCTGAAAATGGTCGATCTCCGTCAGCCGCTG
CAAAACGTGTCAATGCCGTTTTTGCGATTGTATGGCTATCTCGACGGTCTGGTGCCGCGCAAAGTGGTGC
CGATGCTGGATAAACTTTGGCCTCACAGCGAATCATACATCTTCGCCAAAGCGGCCCATGCGCCGTTTAT
TTCGCATCCGGCCGAGTTTTGTCGCATGCTGGTGGTGTTGAAGCAGAGGGTGTAGGTGGCTTTTGAAATG
GCGAGACAGAACTTTACTGGCTCGCCGCAGCCAACTCTTCTTCTGACACCCCGGTAAAGCGCATGATGTC
TGCAAGAGGGACTCCGGATTACAGCATTCTTTTGGCGATATCCAGGGCTTCCAGGCGTCGACCCAATAAA
TAACCAATCAGGTAACTAATAAGATATTCTCTTTCTGCATCTGTCATTAAAACCATCCTTTACGTTATTG
ATGATTTATTTCAGCAAGGTCTTCAACCGTCAGGCTGGTAAATCGCAGAACGTCCTCAAGAGGGACTCCG
GCATCCAGCATGGTTTTGGCGATAGCTCGTATACCTTTCTGAAACCCTTCTTGCCGCAATCTTTCCGCAA
TAGTCATTAAACTCTCCTTGTGTTTCGGTGAACGTTCGGCAACGCCGTCGATAAAATCGTTAAAACGTAC
CGCATCGCCGGTTTGTAGTATGTAATTAAACAGCCCTTTGATTTGTCTGTCATTAGCGTATCCACTACTT
AATAAGCAGGCCATTTGCTCTACCAGCCCCATCAGGTCGCGTTGACGTATATGTTTTTGAATTAGCTCCA
GCAGCGCCATGCGCCGGTGCTGCATGATTTCATCATCAGGCATGACAGTGACATCAATCAGCGGAAATGC
AGAGGCATAAAGCTGCCTTGCCAGTTTGGGATCGGCGAAACAATCCAGCCAACACAGTGAATAGGGATAG
GGGCTTTCAATGCCGTGGTAAAACAACAATGGCACCACCATCGGCAACGTTTTGTATCCGGCATCCAGGT
GATTTTGCATTGCGGCAATAGCGTAACGCATCATGCGAAATGCGATCAGTTTGTTTGAGGTGCTTTGATG
TTCAATCAGACAATAGATATATCCCGGTCCTTGTTCCGTTTTCACCGACCACAGCACGTCGGAATAGCTT
TCACGCAGATCATCATCAATAAAGCTGCTCGACTCCAGCTTGAGGGTTTTCATATCACAGAGCGCGTGAA
TAGGTGCCGGTAAATGGAACGCAAGAAAATCGCGTGCCGTGTCCGGTTGGCGTAAAAAGAGTTTGAACAG
TGCATCATGTGGGGTGGAACTCTGCTTTTTGCTCATGGCGTTCCTTCACCTGTTGTTTGAATGCCGTGAC
TCTACGCGCCACTCCACACCTGTGCATTAGCGAGTTTTCATCCCTGCGAGATGCTTTCAGAGGAACTTAC
GTTGTACTGCAAGAATTGCATTTTTATGGAAAGCCGCACGCAAAAAAGCCCGGATGCAAACGCATACCGG
GCTTTTCAAAACAGGCGATGGAGTATGGTTAACGCAGCGCCCACCACTCGCGCAGACAGGCTTTGCCTTC
CGGGCAGCTTTTACAACTGCCAGAGAGGCAGCCGTCAGGTTCTTCCTGAATCCGCACGGCTTTGCCCATG
CTTTCCAACTGTTGCAGCATGGCGTTAATCATTGGCTGCGGAGTGTTCAATGTCTGGCTTATCTGGGCCG
CTTCCATACGGCTCCGTAACGCCAGCAAATCACGCACCTGAATAAGTGAAGCCATTAATGGCAATCACCG
GTGGTGCTGGCTGCGCAGCAACTGCTTACCGACTTGCGGGTTGCCAGCAGTTCGATATCCACCCGGCTAC
GCGCGCGGCGCAGCAGACCGATAACCACGATGTTAAACAGGATAACCGCCAGAATGCACACCAGGCTGTA
AGTTGGGTGCTGACTGTAGCTGGCGACCTGATAGAACAATGTTGCCAGCGAGTAAGCGATATTCAGCCCC
CACAGGATGGAGAAGCCCATCCAGCCACGGCTTGATTCACGGGCGATGGCTCCCATCACCGAGATACATG
GTACATACAGCAGGACGAAAATCAGGTAGCTGTAAGCTGCTGCTGCGCTACCGAATTTCTGATCCATCAC
GCCCATCGCCCCGGTACCCATTTCGCCGTCGCCTTTGCTGGCTTCAATGGGGTTCATCAGTACGCTAAGG
CTGAAGGTGTCTTTCAGGCTCTGCCAGGTTTCATCTATCGCACTGAACAGCTCTTCACCGAGGTTAAACT
CTGCCGGATTGAACTCTTCGTCCTGAATATTTTCTGCGGTGTAGAGGGTGTTGAGCGTACCCACTACCAC
TTCTTTCGCCATGGCACCTGTAAACAGGCCAACCGTTGCCTGCCAGTTATCTTCATGCACGCCAATTGGC
TTGAAGACCGGGGTGATCACCCGGCTGACGGACGCCAGCGCCGAGTCGTTGATGTTATCGACGATTTTCC
CGCTCAGAGAGAAGCTGTTGAAAGCACTCAGGAAAATGCTGACGATGATAATCACTTTACCAGCACGCAG
AACGAAGCCTTTCAGACGCTGCCAGGTCTGGATAATCAGGCTTTTAACGTGTGGTACATGGTAGACCGGC
AGCTCCATGACAAACGGCGTCGCTTCACCGCGCATGATGGTGTACTTGAGCATCAGGCCAGTCAGCACCG
CCATCACAATACCGAGCATATACAGCGAGAAGACCGCCAGCGCACCGTTCTGCCCGAAGAAGGCAGCCGC
AAATACTGCGAAGATAGCCAGACGCGCGCCGCAGGACATAAACGGTGCCATCATGATGGTCATCAGACGT
TCACGCGGTGCATCAAGCGTACGTGCGCCCATTACCGACGGTACGTTACAACCGAAACCAACGATCAGCG
GTACAAAGGATTTCCCCGGCAAGCCCAGCGCCTGCATCAGACGGTCCATCACAAACGCCGCACGCGCCAT
ATAGCCGGAGTCCTCAAGGAAGGAGAGGAACAGGTACATCATGCCGATCTGCGGCACCAGTGGCAGCACG
GTGTTAATACCGCCGCCCAGGCCTTGGGCGAGGAAGATAGTCAGCCAGTCCGGGAAGTGGAGCGTGTAGC
CAATCCACTGAATACCATGCACAAAGAGTGCTACGGAGCCGACGTCAAACAGCGGCTGTAACGCCCCGCC
GATGTTGATAGCCAGCAAGAACATCAGGTACATCACAAAGAGGAAAATCGGCAGACCGAGGAAACGGTTG
AGCACGATTTTATCTATCGCAGTGGTGAAACGGCTGGGTTCTGCCGTCAGGGTGTTGCTTACCACATCAC
AGATGGCGGCAATGCACTGGTAACGAGCATCGGCAATGTGCAGCGCCGGATCGTCCATCTCATTACGCAG
ACGGGCGAGGGCGGCATCCAGATGCTGCGACGCTTCACCGGCGTAGGCGCGGCTGTAGATATCGCCTTCC
AGCATTTGCAGGCCCAGCCAGCGACGTTGTTTCAGCGAGATGTCGGAACGCATCACTTTTGCCAGTGAAT
CTGCTTCGTTGAGCAGCGGCTGAGCGTAATGCACCAGTTCCACATTCTCGTTAGCTTTATAGCGATCAAT
CGCCAGCTTGAGCGCTTCAATACCGCGACCACGGGTTGAAACCAGCGGGATCACCGGGCAGCCAAGACGC
GCCGACAGCGCATCAATTTCAATGCGAATATTTTGCTTCTCGGCAATGTCGAGCATGTTCAGCGCCACGA
TGCATGGAATGCCGAGTTCCAACAGTTGCAGCGTCAGGTACAGGTTACGCTCAAGGTTAGACGCATCCAC
CACGTTAATCAGCAGGTCTGCGTCGCCACTCAAAATGTAGTGACAGGCGATTTGCTCATCGAGCGAGGTC
TGCGATGAGATGGTGGTCAGAGAATAGGTGCCGGGCAGGTCCACCAGCGTGACCTGATGATCGGTGGTGG
AGAATTGCCCTTCTTTACGTTCGACGGTAACGCCAGCCCAGTTACCTACACGCTGACGTGAGCCAGTGAG
CTGGTTAAATAACGTTGTCTTGCCAGAATTTGGATTACCAATTAAGCCAATGGTTAATTTTTTCATTGTT
GTTATCACCGTATTAACAGGAAACCGCTTCCACTTCTAATAAGGCCAGATCTTTTTTGCGTAATACCAGG
CTCACACGACGGGTTTCGATATGAATGGGGTCGCCGAGTGGAGCGACGCGCACCACATTAAAAGAGGAGC
CAGGTAACATGCCAAGAGAAAGCAGTTTTTGGCGATATGCCGGGCTGATTTCACGGGAAAAGCCAGTAAT
TTTCCACGCAGTATCTGGAGTATATTGCATAGGTGCCTACTTGTTTCTCATTAACTGGATAACTACCTCA
TGGGGCGTTTGACAGCGACATGAGACCAGATGATTTGCCAACGAAGGAGAGATTAAATAATCAACAGTAC
AATGATAATGAGAATGGTTTCTATCAGCAATACTTAAAATGTGTGTGAATGTTGGTTTGAATAATAATCT
GACTCAATGTTGATATGGCTCAAGGTTATATCGCAGCGAAAATATAATTCGCATGACGAATTATTAGGGC
TGGTTAATGTTTAATTAAGGTTTCAGTTGTTAATGAAGTGATAAATATTAACGGAATCTATTATGAGTTT
GGTTGTGGAATAAAAAGACCGGAGATATTCTCCGGCACTTTTATGTCAGGCAAGGCGTTCGTTGCCAGAT
GCGGCGTGAACGCCTAATCGCGCAGGTTTAGGGGCCAGTCCGGGCGTTTAACGTTTTTTGCCCATTGCCG
CCGCCAGCGCATCCATCATCGCGCTGTTACCGGCAGGCTGCGCTTCACGCCCACGCGTTTTGGCTGCCGG
GCGGTTGTTTTGCGGGCGTTCATTACCGCCGCCGCGACGGGCGTTGGTTTCGCCAGGCTGCTCGTCCAGA
CGCATGGTCAGGGCGATACGTTTACGCTGAAGATCCACTTCCAGCACTTTCACCTTCACAATGTCGCCCG
CTTTCACCACGGTATGCGGATCTTCCACAAACTTGTTCGACAATGAAGAGATGTGAACCAGGCCGTCCTG
ATGCACGCCAATATCGACAAACGCGCCAAAGTTGGTGACGTTGGTCACCGCACCTTCGAGGATCATACCC
GGTTGCAGGTCGTTCATTGTCTCGACGCCATCGGCAAACTGAGCGGTTTTAAATTCCGGACGCGGATCGC
GACCCGGTTTTTCCAGCTCTTTGATGATGTCGGTTACCGTCGGCACACCGAATTTCTCATCAGTAAAGCC
AGATGCTTTCAGGTTACGCAGTTTGCTGCTGTTACCCATCAGATCTTTCAGTGCCTGCTGTGTTGCTGCC
AGAATGCGTTCCACCACCGGATAGGCTTCCGGGTGAACGGTAGAAGCGTCCAGCGGGTTATCACCGTGGT
TAATGCGCAAGAAACCCGCGCACTGCTCGAAGGCTTTCGGCCCCAGACGGCTCACTTTTAACAGTTGCTG
ACGGTTCTGGAACTGGCCGTTCTCATCGCGCCAGGCTACGATGTTTTGCGCCATCATGCGCGTCAGGCCC
GCCACGCGGGTTAACAGAGGAACAGAAGCGGTGTTGAGATCGACGCCAACGGCGTTTACGCAGTCTTCTA
CTACTGCATCCAGTTTGCGTGCCAGCTGCGTCTGGCTGACGTCATGCTGATACTGACCTACGCCGATAGA
TTTCGGATCGATTTTCACCAGCTCCGCCAGCGGATCCTGCAAACGACGGGCGATAGACACCGCGCCACGC
AGCGAAACGTCGAGATCCGGGAATTCCTGTGCTGCCAGCTCGGAAGCCGAGTAAACCGACGCGCCAGCTT
CGCTGACGATCACTTTCTGCGCGGTCACTTTCGGGAACTGCTTCTGCACGTCGAGATAGAAACGTTCGGT
TTCGCGAGAAGCTGTACCGTTGCCGATCGCCACCAGTTCAACATTATGCTTTTCACACAGCGCAGCAACG
GTCATCGCTGCTTTTGCGGCCTGCCCGGTATGCGGATAAATGGTATCGGTCGCCACCAGTTTGCCAGTTG
CATCGACTACCGCCACTTTTACCCCAGTACGCAGACCCGGATCGAGGCCCATCGTTGCACGCAGCCCGGC
AGGGGCCGCCATCAGCAGATCATGCAGGTTACGGGCAAAGACGTTGATTGCTTCATCTTCCGCGCGTTCG
CGCACGGTGCCCATCAGTTCAGTTTCCAGATGCATCAACACCTTGATGCGCCACGTCCAGCTCACCACAC
CTTTGCGCCAGCTATCCGCTGGGGCATTGTTCAGGCGCAGGCCAAGGTGATCCATGATGATTTGCTCGCA
ATAGCTCTCTTTCGGCGGTTCTTCGAACTGCGGATCGGCATTCAGCGAAAGCTGAAGTATGCCTTCGTTA
CGACCACGGAACATCGCCAGCGCGCGGTGAGAAGGCACCGTGGACAGCGGTTCGTGATGATCGAAATAGT
CGCGGAATTTCGCCCCTTCCTCTTCTTTACCGCTCGCCACCGTAGAAACCAAATGCGCGTTCTTCCACAG
ATAATCACGCACTTTCGCCAGCAGCGCGGCATCTTCGGCAAACCGTTCCATCAGGATATAGCGCGCGCCG
TCCAGCGCGGCTTTGGTATCTGCCACGCCTTTATCGGCATCAATATATTGTGCAGCGGCGACTTCTGGCG
TGTGTGACGGATCGCTCCACAGCAGATCGGCCAACGGCTCAAGCCCTGCTTCAATGGCGATTTGCCCACG
GGTGCGGCGTTTAGGTTTGTAGGGCAGGTAGAGGTCTTCGAGTTCGGTTTTGCTTAGGGTGGCGTTGATG
GCATTCGCCAGATCATCGGTGAGTTTGCCTTGCTCGGAAATGGACTTGAGGATCGCCTGACGTCTCTCTT
CCAGCTCGCGCAGATAGCTCAGACGCGTTTCCAGATTACGCAGCTGCGTGTCATCCAGACCGCCGGTGAT
TTCCTTACGATAACGTGCGATAAACGGCACGGTATTCCCTTCGTCAAGCAGGCGAACGGCAGCGTCAACC
TGTTCCGGGCGCGCCTGAATTTCACCCGCAATAATGCGGCAGAACGAATCATTCATCATGGTTTGAGTTC
ATCTTTTCGGATCAAAAATCAGGGGATAGTTATACGGACTGGCTGGCAAAAATGCCAGCCATCGGCAGGA
[truncated: 4,730,393 more chars]
